# Supplementary material for: Synthesis and structural analysis of aryloxo-modified trinuclear half-titanocenes, and their use as catalyst precursors for ethylene polymerisation
Source: Royal Society of Chemistry journal article supplement (doi:10.1039/c7ra07581b), 2017-01-01
Supplement: c7ra07581b1.pdf [file c7ra07581b1.pdf]

## Electronic Supplementary Information (ESI)

for

Synthesis and Structural Analysis of Aryloxo-Modified Trinuclear Half-Titanocenes, and  
their Use as Catalyst Precursors for Ethylene Polymerization

Qing Yan, Ken Tsutsumi, and Kotohiro Nomura\*

*Department of Chemistry, Faculty of Science and Engineering, Tokyo Metropolitan  
University, 1-1 Minami Osawa, Hachioji, Tokyo 192-0397, Japan*

### Contents

1. Additional experiments for the reactions of  $\text{Cp}'\text{TiX}_3$  with  $[(\text{LiO}-2,4\text{-R}_2\text{C}_6\text{H}_2)\text{-6-CH}_2]_3\text{N}$  or  $[(\text{HO}-2,4\text{-R}_2\text{C}_6\text{H}_2)\text{-6-CH}_2]_3\text{N}$ .
2. Additional VT  $^1\text{H}$  NMR spectra for  $[\text{Cp}'\text{TiCl}_2\{(\text{O}-2,4\text{-Me}_2\text{C}_6\text{H}_2)\text{-6-CH}_2\}]_3\text{N}$  (**1**).
3.  $^1\text{H}$  NMR spectra for  $[\text{Cp}'\text{TiCl}_2\{(\text{O}-2,4\text{-Me}_2\text{C}_6\text{H}_2)\text{-6-CH}_2\}][\text{Cp}'\text{TiCl}\{(\text{O}-2,4\text{-Me}_2\text{C}_6\text{H}_2)\text{-6-CH}_2\}_2]\text{N}$  [ $\text{Cp}' = \text{Cp}^*$  (**2**), 1,2,4- $\text{Me}_3\text{C}_5\text{H}_2$  (**3**)], and  $[\text{Cp}'\text{TiCl}_2\{(\text{O}-2,4\text{-R}_2\text{C}_6\text{H}_2)\text{-6-CH}_2\}]_3\text{N}$  [ $\text{R} = \text{Me}$ ,  $\text{Cp}' = \text{Cp}$  (**1**);  $\text{R} = \text{'Bu}$ ,  $\text{Cp}' = \text{Cp}$  (**4**),  $\text{Cp}^*$  (**5**),  $\text{'BuC}_5\text{H}_4$  (**6**), 1,2,4- $\text{Me}_3\text{C}_5\text{H}_2$  (**7**)] upon heating in toluene- $d_8$  at 80 °C (for 30 min).
4. Additional ethylene polymerization results.
5. Tables summarized in the crystal collection parameters for  $[\text{Cp}'\text{TiCl}_2\{(\text{O}-2,4\text{-R}_2\text{C}_6\text{H}_2)\text{-6-CH}_2\}]_3\text{N}$  [ $\text{R} = \text{Me}$ ,  $\text{Cp}' = \text{Cp}$  (**1**);  $\text{R} = \text{'Bu}$ ,  $\text{Cp}' = \text{Cp}$  (**4**),  $\text{Cp}^*$  (**5**), 1,2,4- $\text{Me}_3\text{C}_5\text{H}_2$  (**7**)],  $[\text{Cp}'\text{TiCl}_2\{(\text{O}-2,4\text{-Me}_2\text{C}_6\text{H}_2)\text{-6-CH}_2\}][\text{Cp}'\text{TiCl}\{(\text{O}-2,4\text{-Me}_2\text{C}_6\text{H}_2)\text{-6-CH}_2\}_2]\text{N}$  [ $\text{Cp}' = \text{Cp}^*$  (**2**), 1,2,4- $\text{Me}_3\text{C}_5\text{H}_2$  (**3**)], and  $[\text{Cp}^*\text{TiMe}_2\{(\text{O}-2,4\text{-R}_2\text{C}_6\text{H}_2)\text{-6-CH}_2\}]_3\text{N}$  [ $\text{R} = \text{Me}$  (**8**),  $\text{'Bu}$  (**9**)]

**1. Additional experiments for the reactions of Cp\*TiX<sub>3</sub> with [(LiO-2,4-R<sub>2</sub>C<sub>6</sub>H<sub>2</sub>)-6-CH<sub>2</sub>]<sub>3</sub>N or [(HO-2,4-R<sub>2</sub>C<sub>6</sub>H<sub>2</sub>)-6-CH<sub>2</sub>]<sub>3</sub>N.**

**1.1. Reaction of Cp\*TiCl<sub>3</sub> with [(LiO-2,4-Me<sub>2</sub>C<sub>6</sub>H<sub>2</sub>)-6-CH<sub>2</sub>]<sub>3</sub>N.**

To a Et<sub>2</sub>O (or toluene) solution (5 mL) containing Cp\*TiCl<sub>3</sub> (87 mg, 0.3 mmol, or 145 mg, 0.5 mmol) was added Et<sub>2</sub>O (or toluene) solution (2.5 mL) containing 44 mg (0.1 mmol) [(LiO-2,4-Me<sub>2</sub>C<sub>6</sub>H<sub>2</sub>)-6-CH<sub>2</sub>]<sub>3</sub>N dropwise at -30 °C. The reaction mixture was warmed slowly to room temperature and then was stirred overnight. After the removal of solvents, the reaction mixture was analyzed by <sup>1</sup>H NMR. As shown in Figures S1-1 and S1-2, bimetallic complex **2** and remained Cp\*TiCl<sub>3</sub> were observed as major species in <sup>1</sup>H NMR spectra irrespective of equivalence (either 3 or 5 equiv) of Cp\*TiCl<sub>3</sub> and solvent employed.

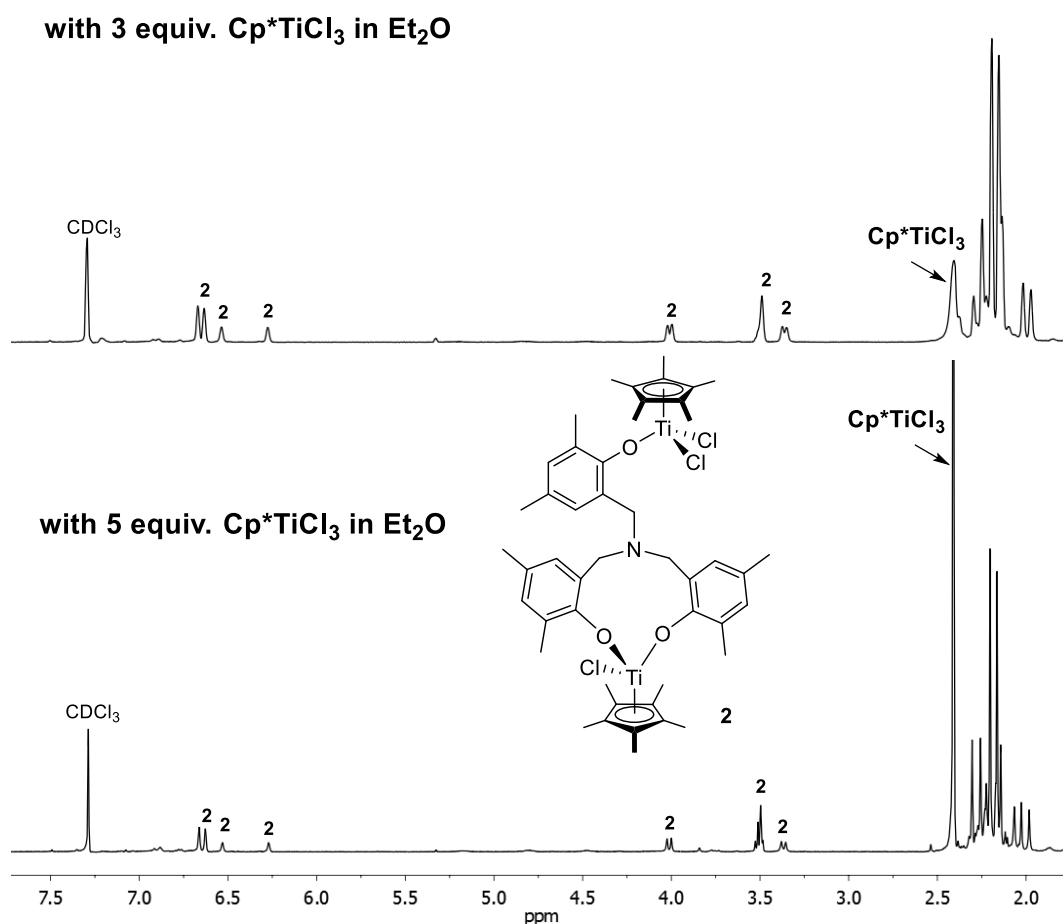

**Figure S1-1.** <sup>1</sup>H NMR spectra (in CDCl<sub>3</sub>) for the reaction mixture of Cp\*TiCl<sub>3</sub> with [(LiO-2,4-Me<sub>2</sub>C<sub>6</sub>H<sub>2</sub>)-6-CH<sub>2</sub>]<sub>3</sub>N (conducted in Et<sub>2</sub>O).

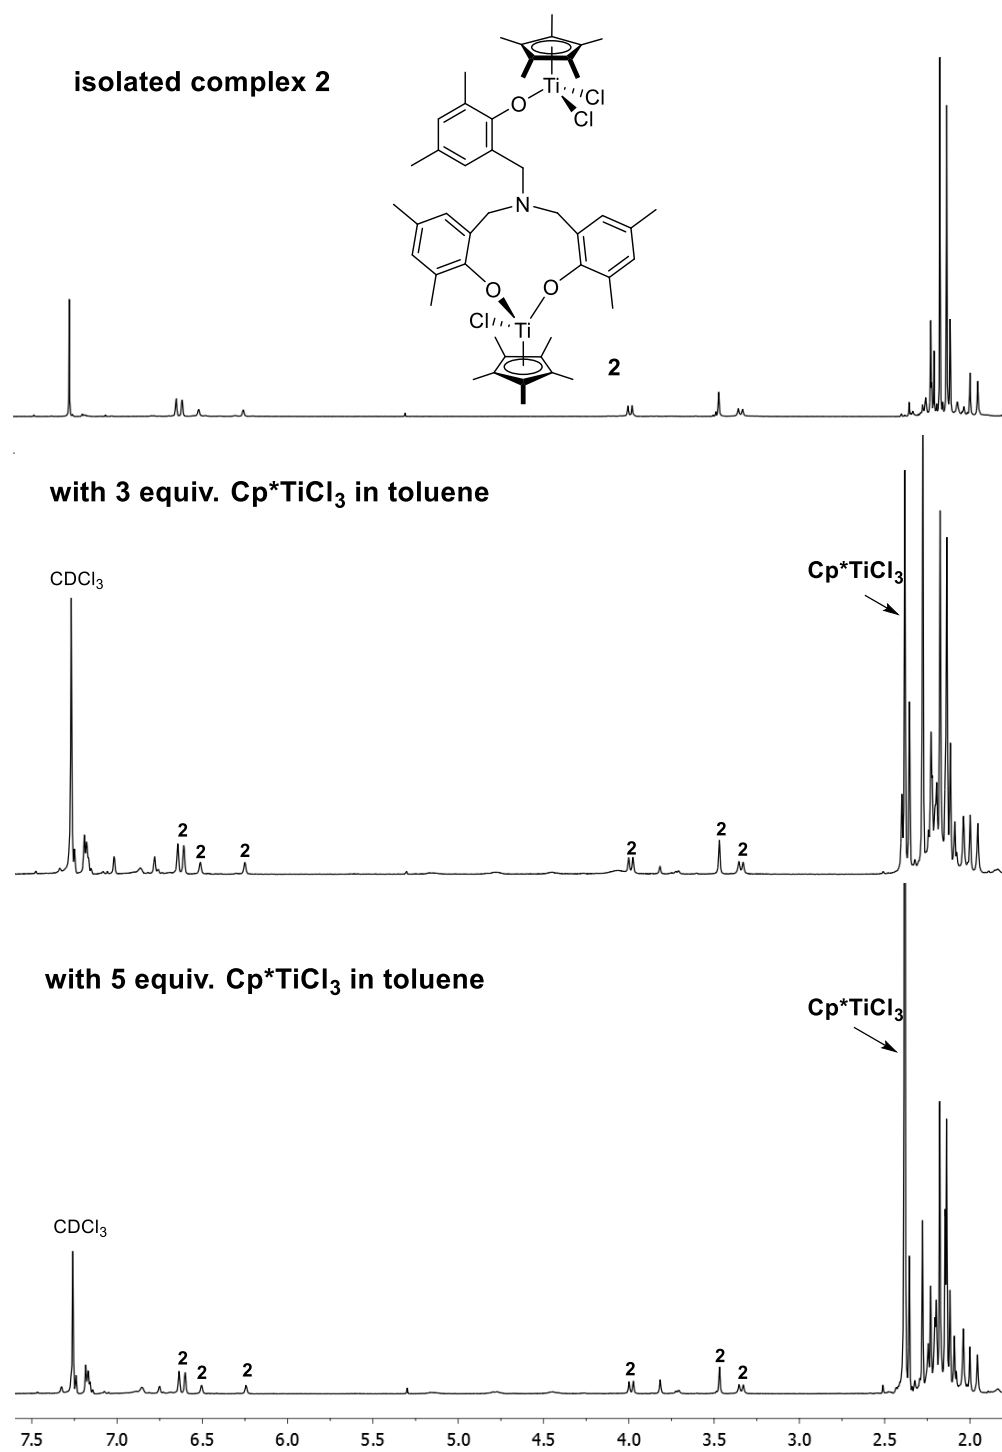

**Figure S1-2.** <sup>1</sup>H NMR spectra (in CDCl<sub>3</sub>) for the reaction mixture of Cp\*TiCl<sub>3</sub> with [(LiO-2,4-Me<sub>2</sub>C<sub>6</sub>H<sub>2</sub>)-6-CH<sub>2</sub>]<sub>3</sub>N (conducted in toluene).

## 1.2. Reaction of (1,2,4-Me<sub>3</sub>C<sub>5</sub>H<sub>2</sub>)TiCl<sub>3</sub> with [(LiO-2,4-Me<sub>2</sub>C<sub>6</sub>H<sub>2</sub>)-6-CH<sub>2</sub>]<sub>3</sub>N.

The reactions were conducted similarly to those of Cp\*TiCl<sub>3</sub> with [(LiO-2,4-Me<sub>2</sub>C<sub>6</sub>H<sub>2</sub>)-6-CH<sub>2</sub>]<sub>3</sub>N (described in 1.1), except that (1,2,4-Me<sub>3</sub>C<sub>5</sub>H<sub>2</sub>)TiCl<sub>3</sub> (78 mg, 0.3 mmol, or 131 mg, 0.5 mmol) was used in place of Cp\*TiCl<sub>3</sub>. As shown in Figure S1-3, bimetallic complex **3** and remained (1,2,4-Me<sub>3</sub>C<sub>5</sub>H<sub>2</sub>)TiCl<sub>3</sub> were observed as major species in <sup>1</sup>H NMR spectra irrespective of equivalence (either 3 or 5 equiv) of (1,2,4-Me<sub>3</sub>C<sub>5</sub>H<sub>2</sub>)TiCl<sub>3</sub> employed.

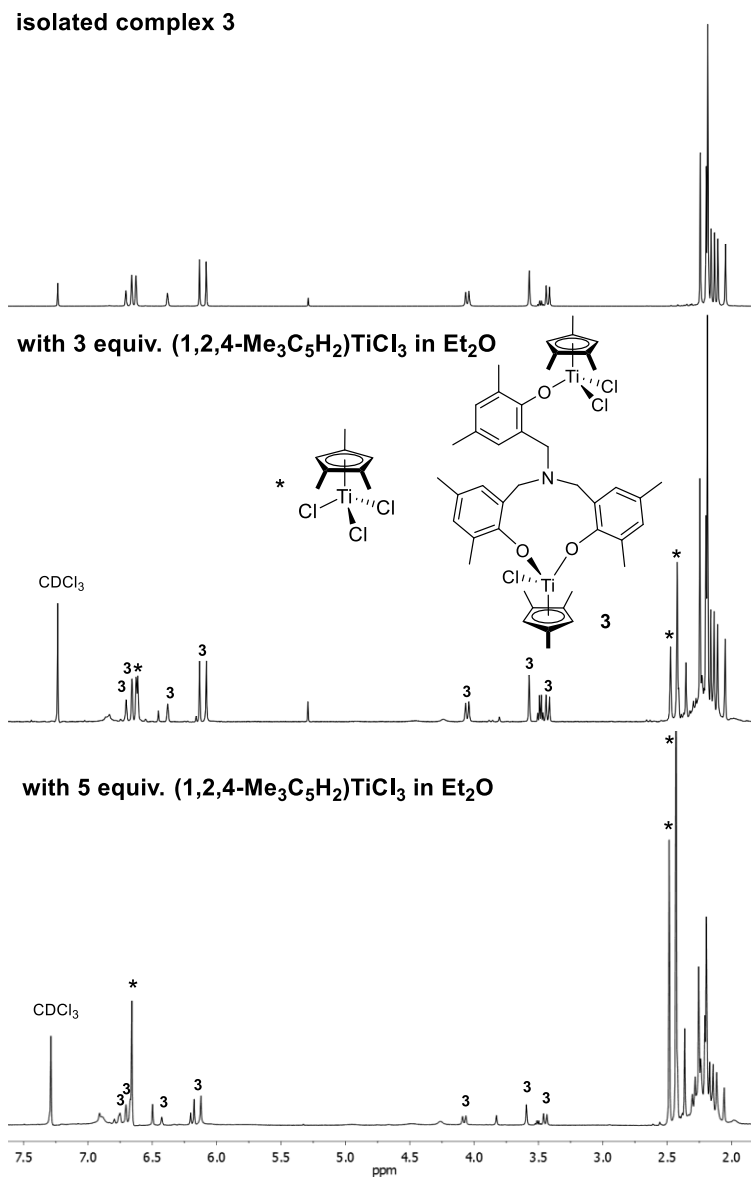

**Figure S1-3.** <sup>1</sup>H NMR spectra (in CDCl<sub>3</sub>) for the reaction mixture of (1,2,4-Me<sub>3</sub>C<sub>5</sub>H<sub>2</sub>)TiCl<sub>3</sub> with [(LiO-2,4-Me<sub>2</sub>C<sub>6</sub>H<sub>2</sub>)-6-CH<sub>2</sub>]<sub>3</sub>N (conducted in Et<sub>2</sub>O).

**1.3. Reaction of Cp\*TiMe<sub>3</sub> (generated *in situ*) with [(HO-2,4-<sup>t</sup>Bu<sub>2</sub>C<sub>6</sub>H<sub>2</sub>)-6-CH<sub>2</sub>]<sub>3</sub>N for attempted synthesis of [Cp\*TiMe<sub>2</sub>{(O-2,4-<sup>t</sup>Bu<sub>2</sub>C<sub>6</sub>H<sub>2</sub>)-6-CH<sub>2</sub>}]<sub>3</sub>N (9).**

Into a toluene solution (18 mL) containing Cp\*TiCl<sub>3</sub> (87 mg, 0.30 mmol) was added MeLi (0.94 mmol, in 0.85 mL Et<sub>2</sub>O solution) slowly at -30 °C. The stirred reaction mixture was warmed slowly to room temperature, and the mixture covered by Al foil was then stirred for 3 h. Into the solution, toluene solution (6.0 mL) containing [(HO-2,4-<sup>t</sup>Bu<sub>2</sub>C<sub>6</sub>H<sub>2</sub>)-6-CH<sub>2</sub>]<sub>3</sub>N (67 mg, 0.10 mmol) was then added by several portions at -30 °C. The reaction mixture was warmed slowly to room temperature, and then stirred overnight. After the removal of solvents, the reaction mixture was analyzed by <sup>1</sup>H NMR. As shown in Figure S1-4, Cp\*TiMe<sub>3</sub> and [(HO-2,4-<sup>t</sup>Bu<sub>2</sub>C<sub>6</sub>H<sub>2</sub>)-6-CH<sub>2</sub>]<sub>3</sub>N remained were observed in <sup>1</sup>H NMR spectra, whereas no other complexes, such as [Cp\*TiMe<sub>2</sub>{(O-2,4-<sup>t</sup>Bu<sub>2</sub>C<sub>6</sub>H<sub>2</sub>)-6-CH<sub>2</sub>}]<sub>3</sub>N (9), were observed.

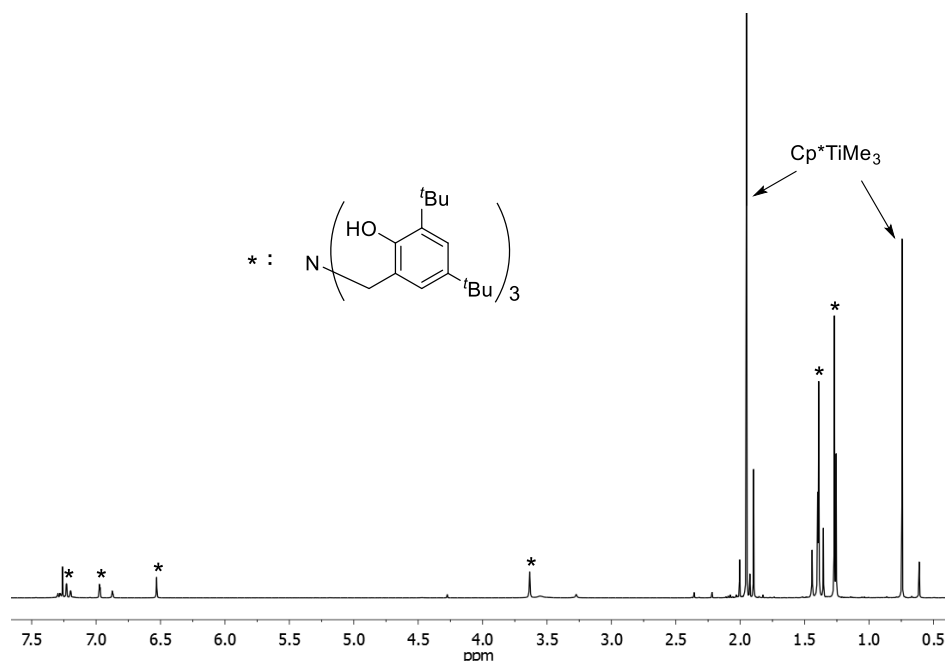

**Figure S1-4.** <sup>1</sup>H NMR spectra (in CDCl<sub>3</sub>) for the reaction mixture of Cp\*TiMe<sub>3</sub> (generated *in situ*) with [(HO-2,4-<sup>t</sup>Bu<sub>2</sub>C<sub>6</sub>H<sub>2</sub>)-6-CH<sub>2</sub>]<sub>3</sub>N.

2. Additional VT  $^1\text{H}$  NMR spectra for  $[\text{CpTiCl}_2\{(\text{O}-2,4\text{-Me}_2\text{C}_6\text{H}_2)\text{-6-CH}_2\}]_3\text{N}$  (**1**).

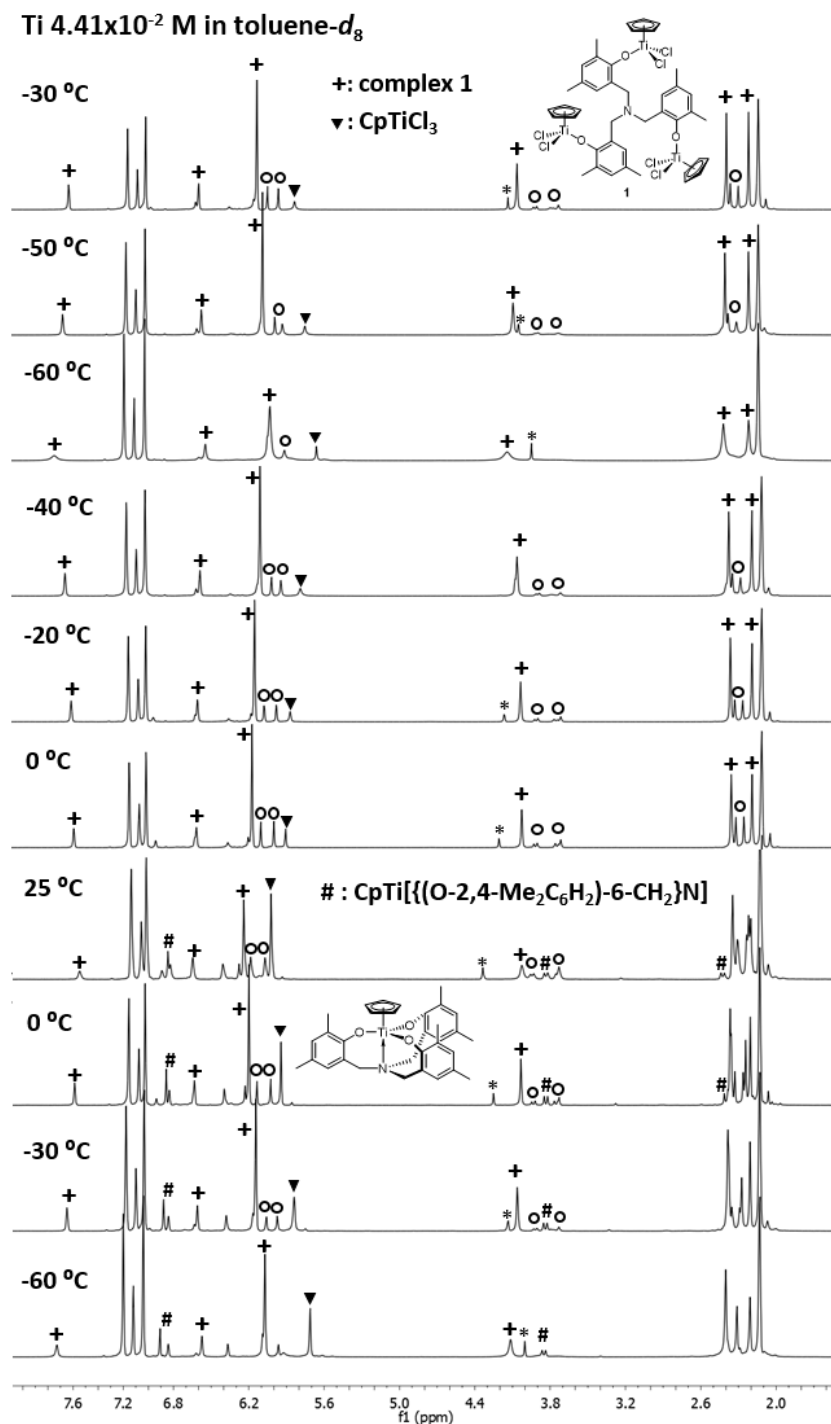

**Figure S2-1.** VT  $^1\text{H}$  NMR spectra (prepared at  $-30\text{ }^\circ\text{C}$ ) of toluene- $d_8$  solution containing  $[\text{CpTiCl}_2\{(\text{O}-2,4\text{-Me}_2\text{C}_6\text{H}_2)\text{-6-CH}_2\}]_3\text{N}$  (**1**) with rather high Ti concentration ( $\text{Ti } 4.41 \times 10^{-2}$  M). Complex **1** (+),  $\text{CpTiCl}_3$  (▼),  $\text{CpTi}\{[(\text{O}-2,4\text{-Me}_2\text{C}_6\text{H}_2)\text{-6-CH}_2]\text{N}\}$  (#), assumed bimetallic species (○). \*Impurity.

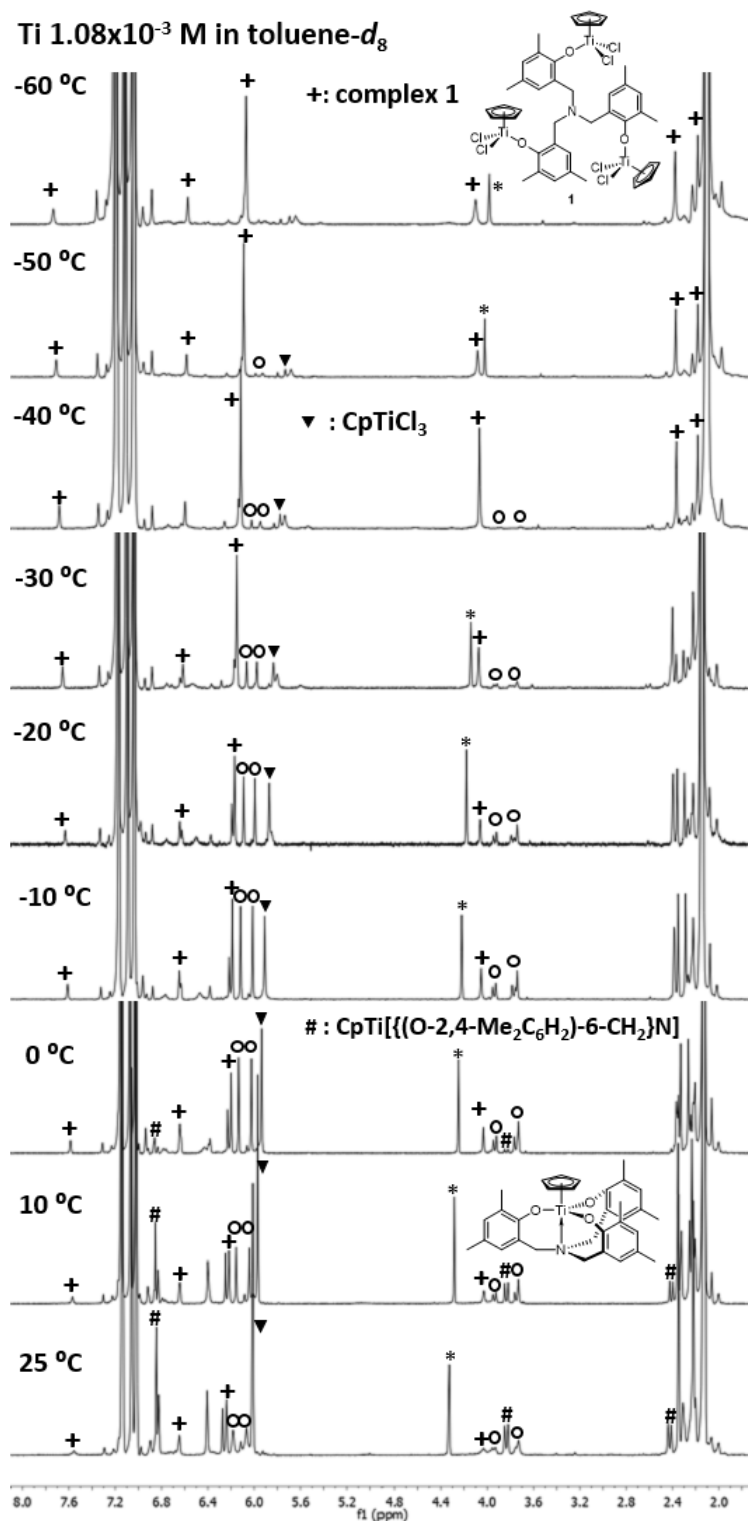

**Figure S2-2.** VT  $^1\text{H}$  NMR spectra (prepared at  $-60^\circ\text{C}$ ) of toluene- $d_8$  solution containing  $[\text{CpTiCl}_2\{\text{(O-2,4-Me}_2\text{C}_6\text{H}_2\text{)-6-CH}_2\}]_3\text{N}$  (**1**) with rather low Ti concentration (Ti  $1.08 \times 10^{-3}$  M). Complex **1** (+),  $\text{CpTiCl}_3$  (▼),  $\text{CpTi}[\{\text{(O-2,4-Me}_2\text{C}_6\text{H}_2\text{)-6-CH}_2\}_3\text{N}$  (#), assumed bimetallic species (○). \*Impurity.

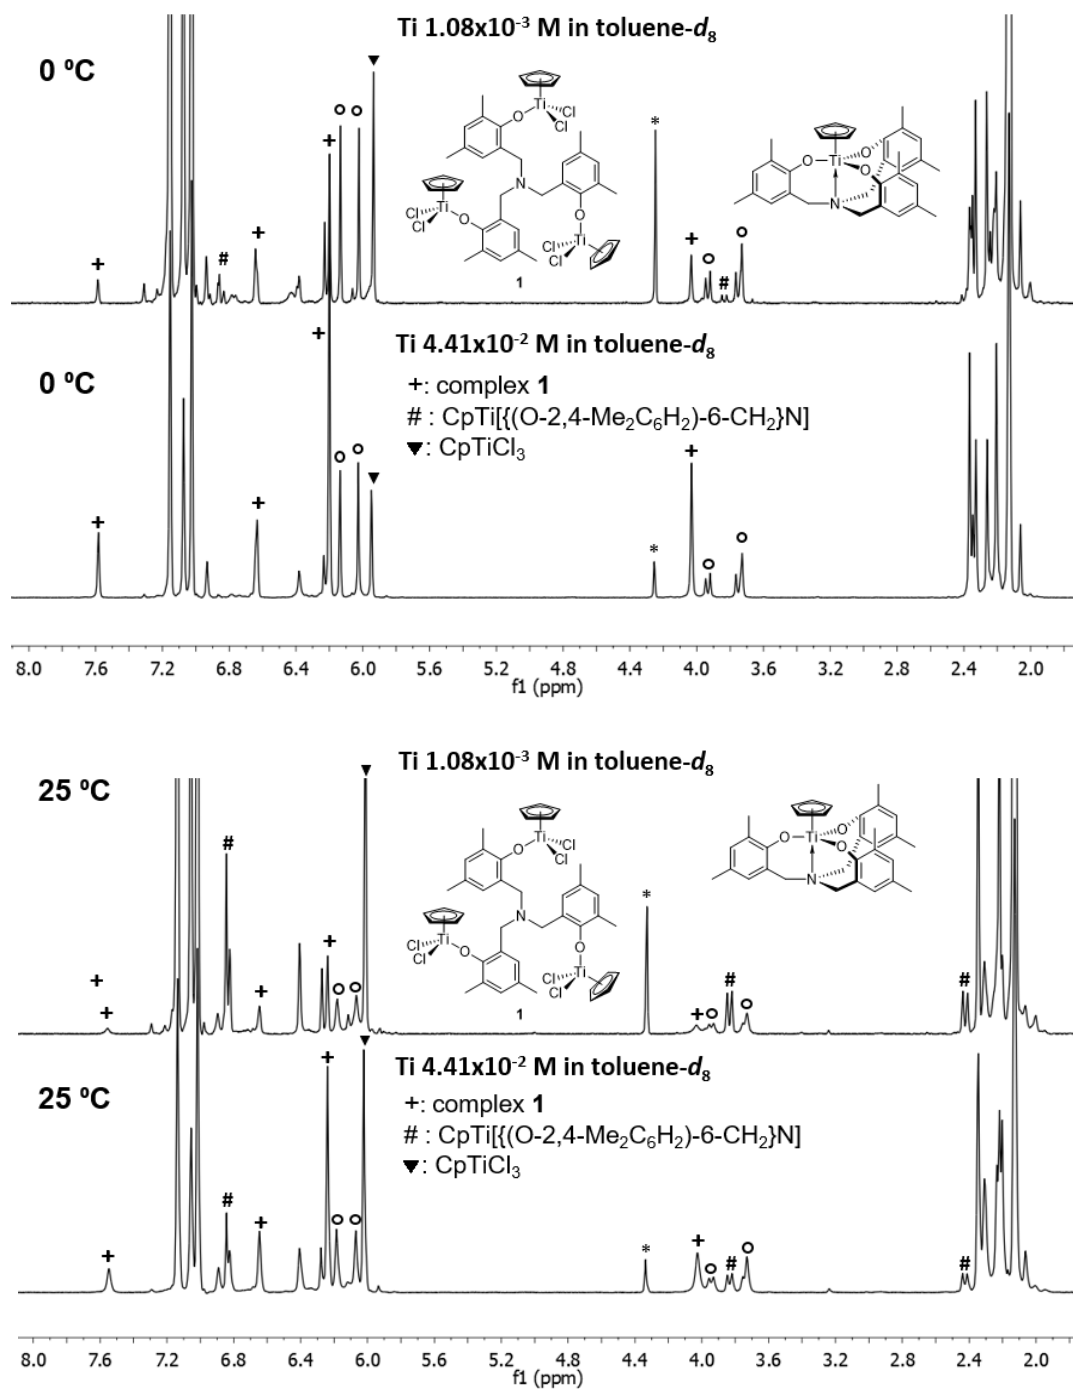

**Figure S2-3.**  $^1\text{H}$  NMR spectra of toluene- $d_8$  solution (at 0 °C or 25 °C) containing  $[\text{CpTiCl}_2\{(\text{O}-2,4\text{-Me}_2\text{C}_6\text{H}_2)\text{-6-CH}_2\}]_3\text{N}$  (**1**) under rather high Ti concentration (Ti  $4.41 \times 10^{-2}$  M) and low (Ti  $1.08 \times 10^{-3}$  M) concentration conditions. Complex **1** (+),  $\text{CpTiCl}_3$  (▼),  $\text{CpTi}[(\text{O}-2,4\text{-Me}_2\text{C}_6\text{H}_2)\text{-6-CH}_2]_3\text{N}$  (#), assumed bimetallic species (○). \*Impurity.



3.  $^1\text{H}$  NMR spectra for  $[\text{Cp}'\text{TiCl}_2\{(\text{O}-2,4\text{-Me}_2\text{C}_6\text{H}_2)\text{-6-CH}_2\}][\text{Cp}'\text{TiCl}\{(\text{O}-2,4\text{-Me}_2\text{C}_6\text{H}_2)\text{-6-CH}_2\}_2\text{N} [\text{Cp}' = \text{Cp}^* (2), 1,2,4\text{-Me}_3\text{C}_5\text{H}_2 (3)]$ , and  $[\text{Cp}'\text{TiCl}_2\{(\text{O}-2,4\text{-R}_2\text{C}_6\text{H}_2)\text{-6-CH}_2\}]_3\text{N} [\text{R} = \text{Me}, \text{Cp}' = \text{Cp} (1); \text{R} = \text{'Bu}, \text{Cp}' = \text{Cp} (4), \text{Cp}^* (5), \text{'BuC}_5\text{H}_4 (6), 1,2,4\text{-Me}_3\text{C}_5\text{H}_2 (7)]$  upon heating in toluene- $d_8$  at 80 °C (for 30 min).

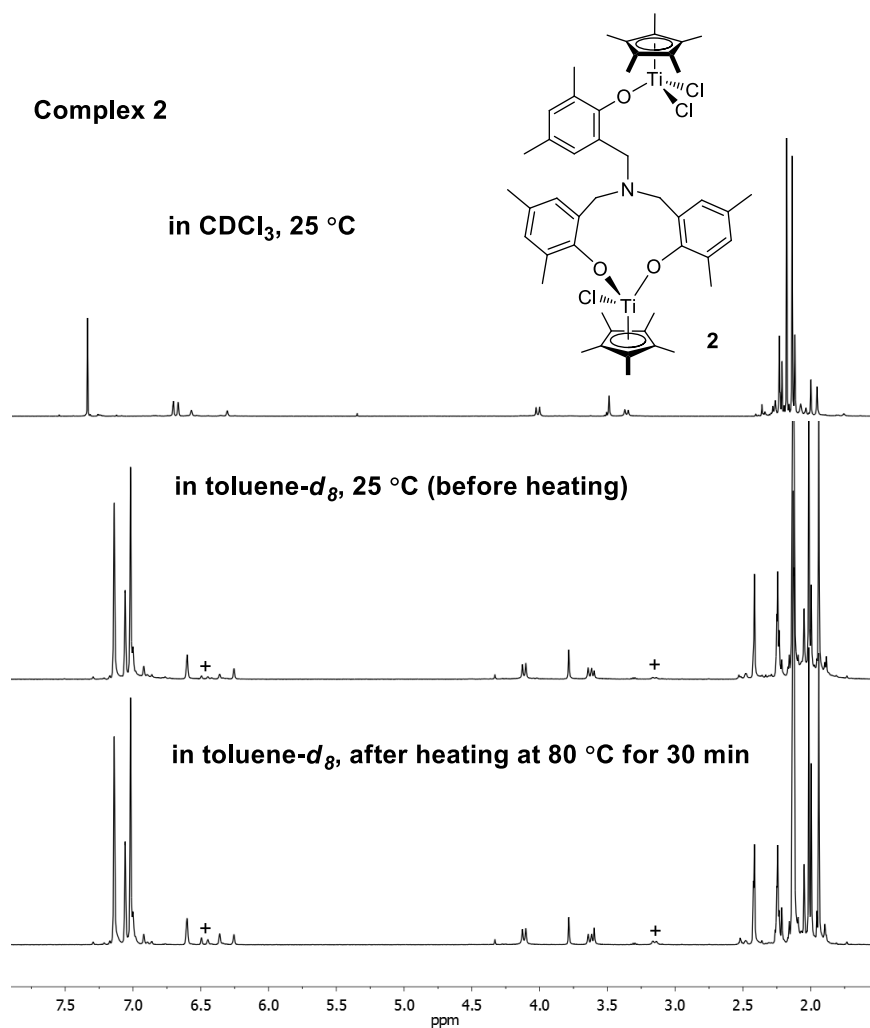

**Figure S2-4.**  $^1\text{H}$  NMR spectra (at 25 °C) of toluene- $d_8$  solution containing  $[\text{Cp}^*\text{TiCl}_2\{(\text{O}-2,4\text{-Me}_2\text{C}_6\text{H}_2)\text{-6-CH}_2\}][\text{Cp}^*\text{TiCl}\{(\text{O}-2,4\text{-Me}_2\text{C}_6\text{H}_2)\text{-6-CH}_2\}_2\text{N} (2)$  after heating at 80 °C for 30 min. Resonances marked with + are resonances which would be different from **2**.

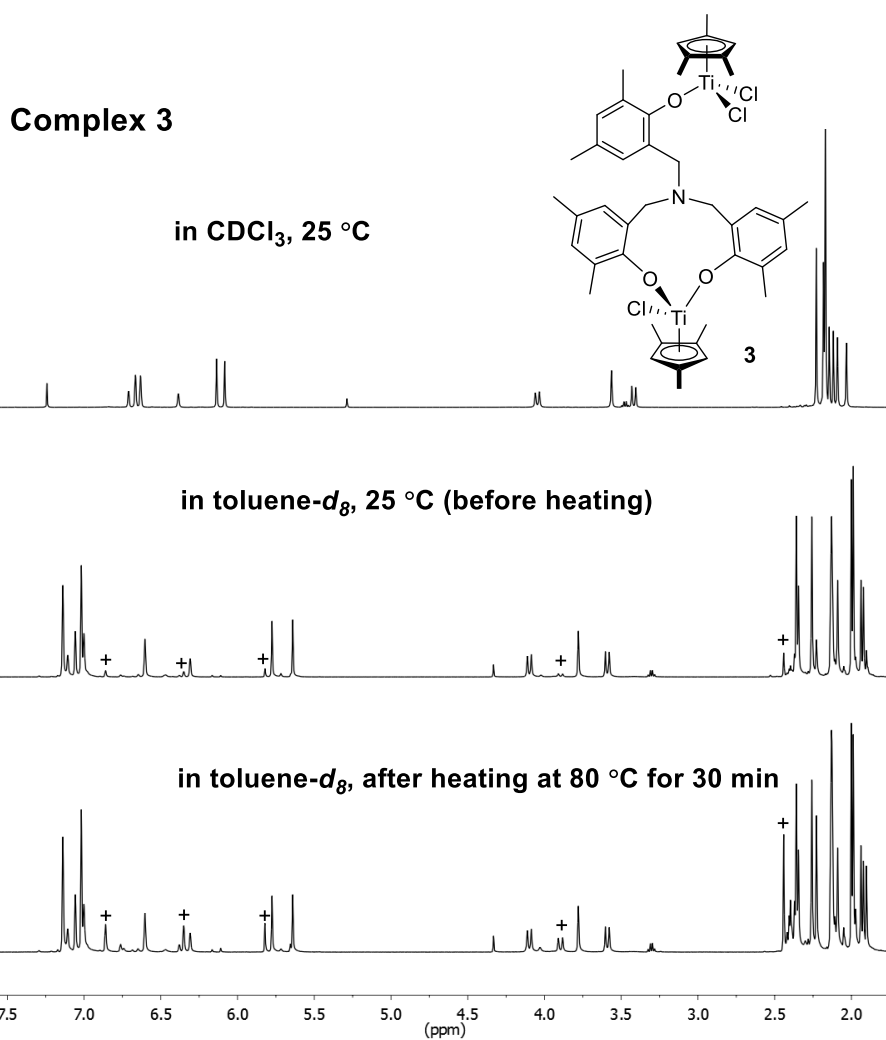

**Figure S2-5.** <sup>1</sup>H NMR spectra (at 25 °C) of toluene-*d*<sub>8</sub> solution containing [(1,2,4-Me<sub>3</sub>C<sub>5</sub>H<sub>2</sub>)TiCl<sub>2</sub>{(O-2,4-Me<sub>2</sub>C<sub>6</sub>H<sub>2</sub>)-6-CH<sub>2</sub>}][(1,2,4-Me<sub>3</sub>C<sub>5</sub>H<sub>2</sub>)TiCl{(O-2,4-Me<sub>2</sub>C<sub>6</sub>H<sub>2</sub>)-6-CH<sub>2</sub>}<sub>2</sub>] N (**3**) after heating at 80 °C for 30 min. Resonances marked with + are resonances which would be different from **3**.

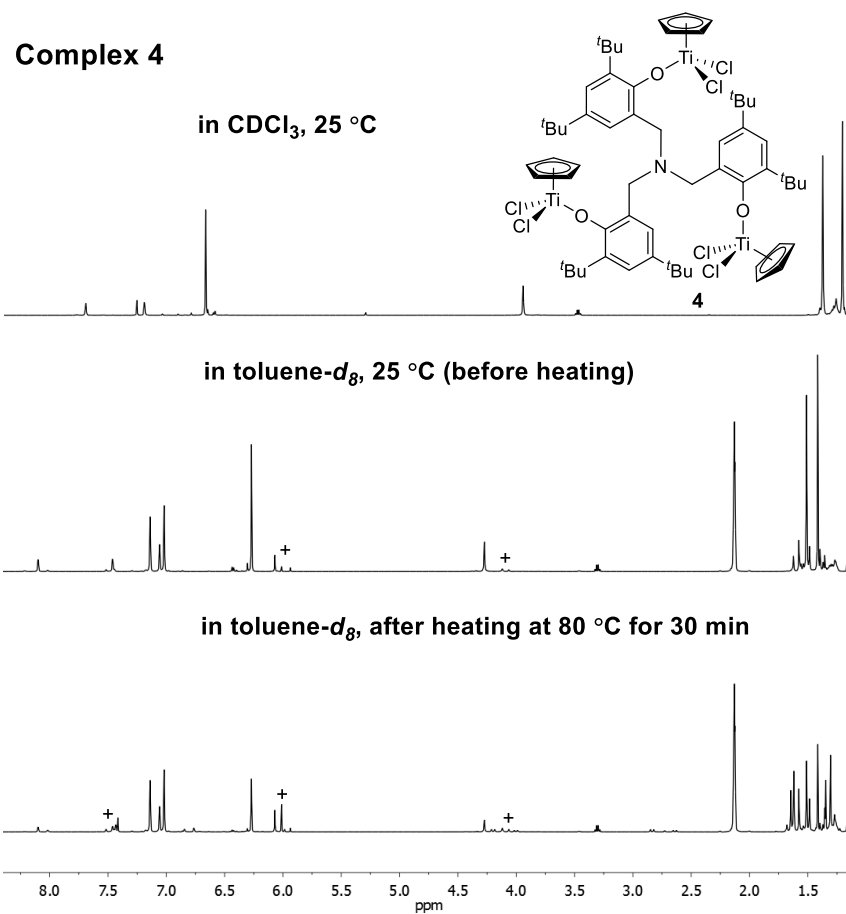

**Figure S2-6.** <sup>1</sup>H NMR spectra of toluene-*d*<sub>8</sub> solution (at 25 °C) containing [CpTiCl<sub>2</sub>{(O-2,4-<sup>t</sup>Bu<sub>2</sub>C<sub>6</sub>H<sub>2</sub>)-6-CH<sub>2</sub>}]<sub>3</sub>N (**4**) after heating at 80 °C for 30 min. Resonances marked with + are resonances which would be different from **4**.

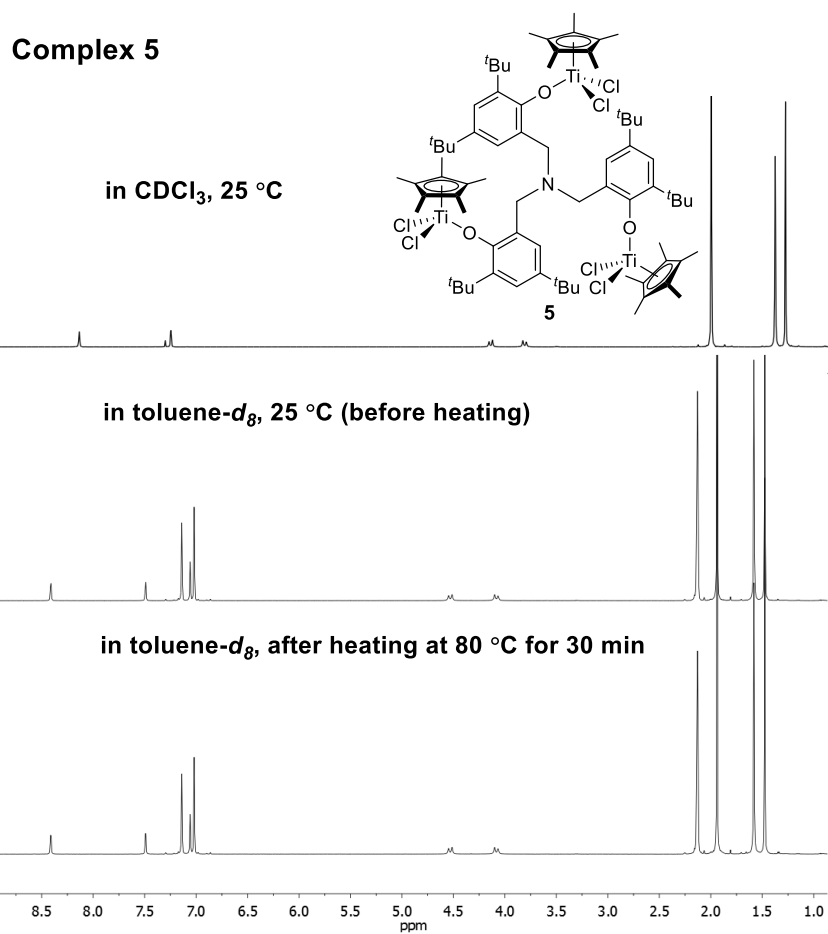

**Figure S2-7.** <sup>1</sup>H NMR spectra of toluene-*d*<sub>8</sub> solution (at 25 °C) containing [Cp\*TiCl<sub>2</sub>{(O-2,4-<sup>t</sup>Bu<sub>2</sub>C<sub>6</sub>H<sub>2</sub>)-6-CH<sub>2</sub>}]<sub>3</sub>N (**5**) after heating at 80 °C for 30 min.

### Complex 6

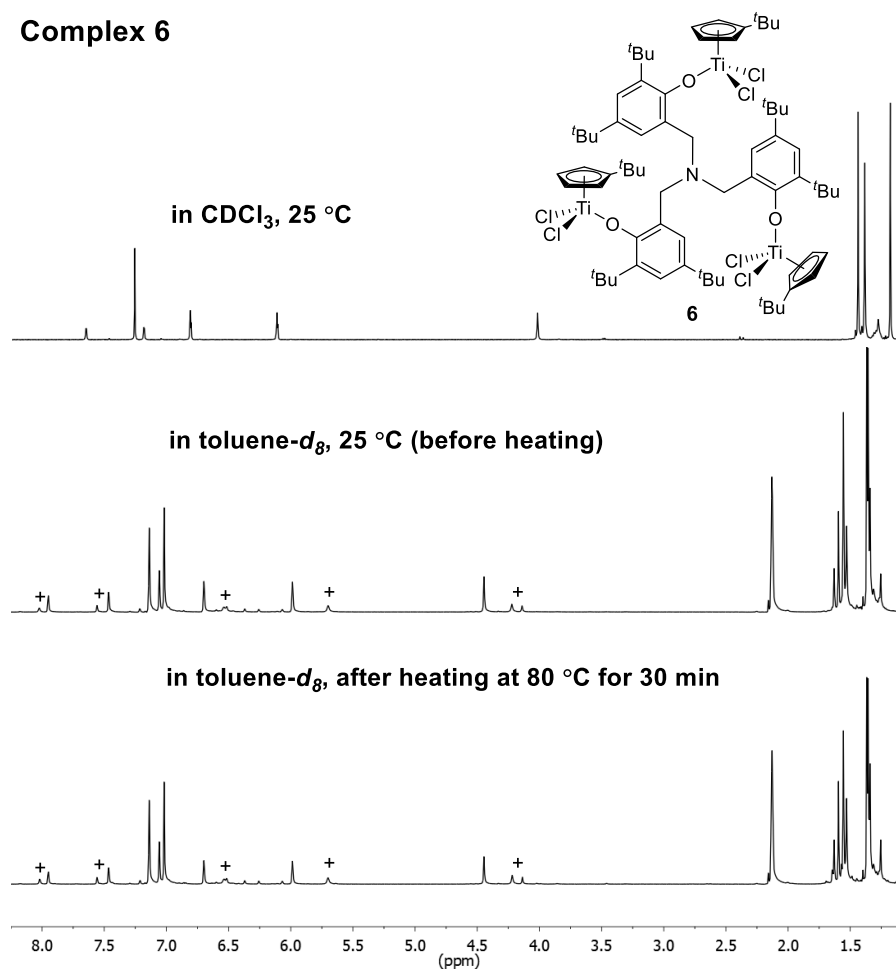

**Figure S2-8.**  $^1\text{H}$  NMR spectra of  $\text{toluene-}d_8$  solution (at 25 °C) containing  $[(^t\text{BuC}_5\text{H}_4)\text{TiCl}_2\{(\text{O-2,4-}^t\text{Bu}_2\text{C}_6\text{H}_2)\text{-6-CH}_2\}]_3\text{N}$  (**6**) after heating at 80 °C for 30 min. Resonances marked with + are resonances which would be different from **6**.

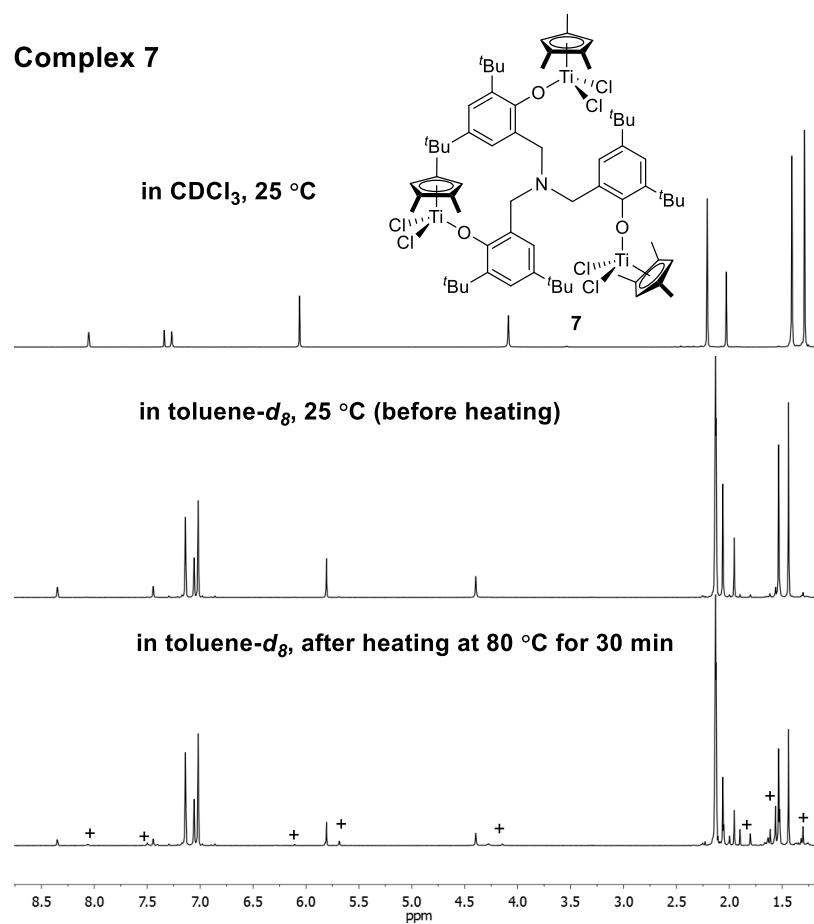

**Figure S2-9.** <sup>1</sup>H NMR spectra of toluene-*d*<sub>8</sub> solution (at 25 °C) containing [(1,2,4-Me<sub>3</sub>C<sub>5</sub>H<sub>2</sub>)TiCl<sub>2</sub>{(O-2,4-<sup>t</sup>Bu<sub>2</sub>C<sub>6</sub>H<sub>2</sub>)-6-CH<sub>2</sub>}]<sub>3</sub>N (**7**) after heating at 80 °C for 30 min. Resonances marked with + are resonances which would be different from **7**.

#### 4. Additional ethylene polymerization results.

**Table S1.** Ethylene polymerization by  $[\text{Cp}'\text{TiCl}_2\{(\text{O}-2,4\text{-R}_2\text{C}_6\text{H}_2)\text{-6-CH}_2\}]_3\text{N}$  [R = Me, Cp' = Cp (**1**); R = *t*Bu, Cp' = Cp (**4**), Cp\* (**5**), *t*BuC<sub>5</sub>H<sub>4</sub> (**6**), 1,2,4-Me<sub>3</sub>C<sub>5</sub>H<sub>2</sub> (**7**)],  $[\text{Cp}'\text{TiCl}_2\{(\text{O}-2,4\text{-Me}_2\text{C}_6\text{H}_2)\text{-6-CH}_2\}][\text{Cp}'\text{TiCl}\{(\text{O}-2,4\text{-Me}_2\text{C}_6\text{H}_2)\text{-6-CH}_2\}_2\text{N}]$  [Cp' = Cp\* (**2**), 1,2,4-Me<sub>3</sub>C<sub>5</sub>H<sub>2</sub> (**3**)], and  $[\text{Cp}^*\text{TiMe}_2\{(\text{O}-2,4\text{-R}_2\text{C}_6\text{H}_2)\text{-6-CH}_2\}]_3\text{N}$  [R = Me (**8**), *t*Bu (**9**)] in the presence of MAO cocatalyst (ethylene 4 atm, 25 °C).<sup>a</sup>

| run | catalyst<br>( $\mu\text{mol}$ ) | MAO<br>/ mmol | time<br>/ min | polymer<br>/ mg | activity <sup>b</sup> | $M_n^c \times 10^{-4}$ | $M_w/M_n^c$ |
|-----|---------------------------------|---------------|---------------|-----------------|-----------------------|------------------------|-------------|
| 1   | <b>1</b> (0.50)                 | 3.0           | 10            | 80              | 320                   | 341                    | 2.13        |
| S1  | <b>1</b> (0.50)                 | 3.0           | 10            | 70              | 280                   | 358                    | 2.06        |
| 2   | <b>2</b> (0.03)                 | 3.0           | 10            | 107             | 10700                 | 309, 3.91              | 2.11, 1.95  |
| S2  | <b>2</b> (0.03)                 | 3.0           | 10            | 93              | 9300                  | 354, 3.97              | 1.62, 2.24  |
| 3   | <b>2</b> (0.03)                 | 3.0           | 5             | 78              | 15600                 | 368, 3.09              | 2.67, 2.19  |
| 4   | <b>2</b> (0.03)                 | 3.0           | 5             | 75              | 15000                 | 300, 1.93              | 2.29, 2.58  |
| 5   | <b>3</b> (0.30)                 | 3.0           | 10            | 116             | 1160                  | 368, 0.96              | 1.72, 1.82  |
| S3  | <b>3</b> (0.30)                 | 3.0           | 10            | 101             | 1010                  | 375, 1.02              | 1.82, 2.02  |
| 6   | <b>4</b> (0.50)                 | 2.0           | 10            | 120             | 480                   | 220                    | 2.13        |
| 7   | <b>4</b> (0.50)                 | 2.0           | 10            | 124             | 496                   | 239                    | 2.21        |
| 8   | <b>4</b> (0.50)                 | 3.0           | 10            | 186             | 744                   | 204                    | 2.44        |
| 9   | <b>4</b> (0.50)                 | 3.0           | 10            | 180             | 720                   | 202                    | 2.48        |
| 10  | <b>4</b> (0.50)                 | 4.0           | 10            | 140             | 560                   | 238                    | 2.64        |
| 11  | <b>4</b> (0.50)                 | 4.0           | 10            | 136             | 544                   | 232                    | 2.66        |
| 12  | <b>5</b> (0.50)                 | 3.0           | 10            | 107             | 428                   | 172                    | 2.90        |
| S4  | <b>5</b> (0.50)                 | 3.0           | 10            | 96              | 384                   | 164                    | 2.76        |
| 13  | <b>6</b> (0.50)                 | 3.0           | 10            | 44              | 176                   | 277                    | 2.26        |
| S5  | <b>6</b> (0.50)                 | 3.0           | 10            | 38              | 157                   | 268                    | 2.06        |
| 14  | <b>7</b> (0.25)                 | 3.0           | 10            | 75              | 600                   | 93.1, 1.12             | 3.95, 2.11  |
| S6  | <b>7</b> (0.25)                 | 3.0           | 10            | 62              | 496                   | 74.8, 0.82             | 4.00, 2.05  |
| 15  | <b>7</b> (0.25)                 | 3.0           | 5             | 26              | 416                   | 238, 0.97              | 2.75, 2.05  |
| S7  | <b>7</b> (0.25)                 | 3.0           | 5             | 23              | 368                   | 238, 1.37              | 2.70, 1.68  |
| 16  | <b>8</b> (0.01)                 | 3.0           | 10            | 84              | 16800                 | 214                    | 2.20        |
| S9  | <b>8</b> (0.01)                 | 3.0           | 10            | 75              | 15000                 | 190                    | 2.38        |
| 17  | <b>9</b> (0.10)                 | 3.0           | 10            | 453             | 9060                  | 354                    | 2.24        |
| S10 | <b>9</b> (0.10)                 | 3.0           | 10            | 436             | 8720                  | 368                    | 2.16        |
| 18  | <b>9</b> (0.01)                 | 3.0           | 10            | 58              | 11600                 | 128                    | 3.04        |
| S11 | <b>9</b> (0.01)                 | 3.0           | 10            | 55              | 11000                 | 121                    | 3.16        |

<sup>a</sup>Conditions: toluene total 30 mL, d-MAO (prepared by removing toluene and AlMe<sub>3</sub> from the ordinary MAO). <sup>b</sup>Activity in kg-PE/mol-Ti·h. <sup>c</sup>GPC data in *o*-dichlorobenzene vs polystyrene standards.

**Table S2.** Effect of polymerization temperature in ethylene polymerization by [Cp\*TiCl<sub>2</sub>{(O-2,4-Me<sub>2</sub>C<sub>6</sub>H<sub>2</sub>)-6-CH<sub>2</sub>}][Cp\*TiCl{(O-2,4-Me<sub>2</sub>C<sub>6</sub>H<sub>2</sub>)-6-CH<sub>2</sub>}<sub>2</sub>]N (**2**), [Cp'TiCl<sub>2</sub>{(O-2,4-'Bu<sub>2</sub>C<sub>6</sub>H<sub>2</sub>)-6-CH<sub>2</sub>}]<sub>3</sub>N [Cp' = Cp (**4**), Cp\* (**5**), 'BuC<sub>5</sub>H<sub>4</sub> (**6**), 1,2,4-Me<sub>3</sub>C<sub>5</sub>H<sub>2</sub> (**7**)], and [Cp\*TiMe<sub>2</sub>{(O-2,4-R<sub>2</sub>C<sub>6</sub>H<sub>2</sub>)-6-CH<sub>2</sub>}]<sub>3</sub>N [R = Me (**8**), 'Bu (**9**)] in the presence of MAO cocatalyst.<sup>a</sup>

| run | catalyst<br>( $\mu\text{mol}$ ) | temp.<br>/ °C | time<br>/ min | polymer<br>/ mg | activity <sup>b</sup> | $M_n^c \times 10^{-4}$ | $M_w/M_n^c$ |
|-----|---------------------------------|---------------|---------------|-----------------|-----------------------|------------------------|-------------|
| 8   | <b>4</b> (0.50)                 | 25            | 10            | 186             | 744                   | 204                    | 2.44        |
| 19  | <b>4</b> (0.10)                 | 50            | 10            | 74              | 1480                  | 215                    | 2.04        |
| S12 | <b>4</b> (0.10)                 | 50            | 10            | 62              | 1240                  | 208                    | 2.24        |
| 13  | <b>6</b> (0.50)                 | 25            | 10            | 44              | 176                   | 277                    | 2.26        |
| 20  | <b>6</b> (0.30)                 | 50            | 10            | 58              | 387                   | 226                    | 2.48        |
| S13 | <b>6</b> (0.30)                 | 50            | 10            | 50              | 333                   | 228                    | 2.46        |
| 14  | <b>7</b> (0.25)                 | 25            | 10            | 75              | 600                   | 93.1, 112              | 3.95, 2.11  |
| 21  | <b>7</b> (0.10)                 | 50            | 10            | 43              | 860                   | 220, 0.67              | 2.15, 1.62  |
| S14 | <b>7</b> (0.10)                 | 50            | 10            | 41              | 820                   | 232, 0.58              | 2.27, 1.76  |
| 2   | <b>2</b> (0.03)                 | 25            | 10            | 107             | 10700                 | 309, 3.91              | 2.11, 1.95  |
| 22  | <b>2</b> (0.05)                 | 50            | 10            | 140             | 8400                  | 220, 1.44              | 1.67, 2.13  |
| S15 | <b>2</b> (0.05)                 | 50            | 10            | 132             | 7920                  | 228, 1.61              | 1.73, 1.81  |
| 23  | <b>2</b> (0.05)                 | 80            | 10            | 65              | 3900                  | 173, 0.95              | 1.47, 1.81  |
| S16 | <b>2</b> (0.05)                 | 80            | 10            | 61              | 3660                  | 169, 0.85              | 1.59, 1.86  |
| 12  | <b>5</b> (0.50)                 | 25            | 10            | 107             | 428                   | 172                    | 2.90        |
| 24  | <b>5</b> (0.10)                 | 50            | 10            | 158             | 3160                  | 113                    | 2.85        |
| S17 | <b>5</b> (0.10)                 | 50            | 10            | 145             | 2900                  | 101                    | 3.19        |
| 25  | <b>5</b> (0.10)                 | 80            | 10            | 150             | 3000                  | 26, 0.83               | 3.08, 1.63  |
| S18 | <b>5</b> (0.10)                 | 80            | 10            | 128             | 2560                  | 30, 0.84               | 3.76, 1.33  |
| 26  | <b>5</b> (0.10)                 | 80            | 5             | 121             | 4840                  | 38, 0.88               | 4.85, 1.64  |
| S19 | <b>5</b> (0.10)                 | 80            | 5             | 117             | 4680                  | 36, 0.97               | 4.81, 1.53  |
| 27  | <b>5</b> (0.10)                 | 100           | 10            | 68              | 1360                  | 112, 0.61              | 1.92, 1.68  |
| S20 | <b>5</b> (0.10)                 | 100           | 10            | 51              | 1020                  | 100, 0.63              | 1.68, 1.98  |
| 16  | <b>8</b> (0.01)                 | 25            | 10            | 84              | 16800                 | 214                    | 2.2         |
| 28  | <b>8</b> (0.02)                 | 50            | 10            | 128             | 12800                 | 215, 1.44              | 1.49, 2.06  |
| S21 | <b>8</b> (0.02)                 | 50            | 10            | 112             | 11200                 | 198, 1.37              | 1.66, 2.00  |
| 29  | <b>8</b> (0.02)                 | 50            | 5             | 110             | 22000                 | 277, 2.09              | 2.33, 1.79  |
| S22 | <b>8</b> (0.02)                 | 50            | 5             | 101             | 20200                 | 273, 1.99              | 2.37, 1.87  |
| 30  | <b>8</b> (0.04)                 | 80            | 10            | 84              | 4200                  | 180, 0.96              | 1.53, 1.69  |
| S23 | <b>8</b> (0.04)                 | 80            | 10            | 80              | 4000                  | 184, 0.99              | 1.50, 1.73  |
| 17  | <b>9</b> (0.10)                 | 25            | 10            | 453             | 9060                  | 354                    | 2.24        |
| 31  | <b>9</b> (0.05)                 | 50            | 10            | 107             | 4280                  | 126, 2.44              | 3.94, 1.53  |
| S24 | <b>9</b> (0.05)                 | 50            | 10            | 89              | 3560                  | 120, 2.09              | 4.10, 1.32  |

<sup>a</sup> Conditions: toluene total 30 mL, d-MAO 3.0 mmol, ethylene 4 atm. <sup>b</sup> Activity in kg-PE/mol-Ti·h. <sup>c</sup> GPC data in *o*-dichlorobenzene vs polystyrene standards.



**Table S3.** Ethylene polymerization by Cp'TiCl<sub>2</sub>(O-2-R-4,6-Me<sub>2</sub>C<sub>6</sub>H<sub>2</sub>) [Cp' = Cp, R = Me (**10**), <sup>t</sup>Bu (**11**); Cp' = Cp\*, R = Me (**12**), <sup>t</sup>Bu (**13**)] in the presence of MAO cocatalyst.<sup>a</sup>

| run | catalyst<br>( $\mu\text{mol}$ ) | temp.<br>/ °C | polymer<br>/ mg | activity <sup>b</sup> | $M_n^c \times 10^{-4}$ | $M_w/M_n^c$ |
|-----|---------------------------------|---------------|-----------------|-----------------------|------------------------|-------------|
| 32  | <b>10</b> (0.50)                | 25            | 110             | 1320                  | 305                    | 2.15        |
| S25 | <b>10</b> (0.50)                | 25            | 96              | 1150                  | 301                    | 2.10        |
| 33  | <b>11</b> (0.50)                | 25            | 128             | 1540                  | 30.3                   | 7.69        |
| 34  | <b>11</b> (0.50)                | 50            | 144             | 1730                  | 78.4                   | 4.35        |
| S26 | <b>11</b> (0.50)                | 50            | 141             | 1690                  | 75.8                   | 4.06        |
| 35  | <b>12</b> (0.50)                | 25            | 430             | 5160                  | 208                    | 2.09        |
| 36  | <b>12</b> (0.10)                | 25            | 173             | 10400                 | 139                    | 2.71        |
| S27 | <b>12</b> (0.10)                | 25            | 158             | 9480                  | 131                    | 2.80        |
| 37  | <b>13</b> (0.50)                | 25            | 189             | 2270                  | 26.0                   | 9.33        |
| 38  | <b>13</b> (0.50)                | 50            | 199             | 2390                  | 121                    | 2.92        |
| S28 | <b>13</b> (0.50)                | 50            | 208             | 2500                  | 121                    | 3.37        |

<sup>a</sup> Conditions: toluene total 30 mL, d-MAO 3.0 mmol, ethylene 4 atm, 10 min. <sup>b</sup> Activity in kg-PE/mol-Ti·h. <sup>c</sup> GPC data in *o*-dichlorobenzene vs polystyrene standards.

**Table S4.** Ethylene polymerization by [Cp\*TiX<sub>2</sub>{(O-2,4-'Bu<sub>2</sub>C<sub>6</sub>H<sub>2</sub>)-6-CH<sub>2</sub>}]<sub>3</sub>N [X = Cl (**5**), Me (**9**)], [Cp\*TiMe<sub>2</sub>{(O-2,4-Me<sub>2</sub>C<sub>6</sub>H<sub>2</sub>)-6-CH<sub>2</sub>}]<sub>3</sub>N (**8**), Cp\*TiCl<sub>2</sub>(2-R-4,6 Me<sub>2</sub>C<sub>6</sub>H<sub>2</sub>) [R = Me (**12**), 'Bu (**13**)] in the presence of Al<sup>i</sup>Bu<sub>3</sub>/[Ph<sub>3</sub>C][B(C<sub>6</sub>F<sub>5</sub>)<sub>4</sub>] cocatalysts.<sup>a</sup>

| run | catalyst<br>( $\mu\text{mol}$ ) | Al/Ti <sup>b</sup> | temp.<br>/ °C | polymer<br>/ mg | activity <sup>c</sup> | $M_n^d \times 10^{-4}$ | $M_w/M_n^d$ |
|-----|---------------------------------|--------------------|---------------|-----------------|-----------------------|------------------------|-------------|
| 39  | <b>5</b> (0.02)                 | 700                | 25            | 71              | 7100                  | 71.6                   | 3.37        |
| S29 | <b>5</b> (0.02)                 | 700                | 25            | 63              | 6300                  | 71.6                   | 3.45        |
| 40  | <b>8</b> (0.02)                 | 100                | 25            | trace           |                       |                        |             |
| 41  | <b>8</b> (0.01)                 | 300                | 25            | 60              | 12000                 | 71.6                   | 3.78        |
| 42  | <b>8</b> (0.01)                 | 500                | 25            | 84              | 16800                 | 88.1                   | 3.79        |
| 43  | <b>8</b> (0.01)                 | 700                | 25            | 138             | 27600                 | 115                    | 3.15        |
| S30 | <b>8</b> (0.01)                 | 700                | 25            | 112             | 22400                 | 124                    | 3.24        |
| 44  | <b>8</b> (0.01)                 | 900                | 25            | 36              | 7200                  | 70.8                   | 3.33        |
| S31 | <b>8</b> (0.01)                 | 900                | 25            | 29              | 5800                  | 71.6                   | 3.23        |
| 45  | <b>8</b> (0.01)                 | 700                | 0             | 61              | 12200                 | 77.7                   | 2.70        |
| 46  | <b>8</b> (0.01)                 | 700                | 0             | 70              | 14000                 | 78.4                   | 2.70        |
| 47  | <b>9</b> (0.02)                 | 700                | 25            | 20              | 2000                  | 78.5                   | 4.21        |
| S32 | <b>9</b> (0.02)                 | 700                | 25            | 15              | 1500                  | 76.5                   | 4.26        |
| 48  | <b>12</b> (0.03)                | 700                | 25            | 109             | 21800                 | 63.7                   | 4.17        |
| S33 | <b>12</b> (0.03)                | 700                | 25            | 107             | 21400                 | 65.1                   | 4.98        |
| 49  | <b>13</b> (0.06)                | 700                | 25            | 85              | 8500                  | 54.9                   | 2.82        |
| S34 | <b>13</b> (0.06)                | 700                | 25            | 72              | 7200                  | 52.4                   | 2.84        |

<sup>a</sup> Conditions: toluene total 30 mL, Al<sup>i</sup>Bu<sub>3</sub>, [Ph<sub>3</sub>C][B(C<sub>6</sub>F<sub>5</sub>)<sub>4</sub>] B/Ti = 1.5 (molar ratio), 4 atm, 10 min.

<sup>b</sup>Molar ratio. <sup>c</sup>Activity in kg-PE/mol-Ti·h. <sup>d</sup>GPC data in *o*-dichlorobenzene vs polystyrene standards.

**5. Tables summarized in the crystal collection parameter for [Cp'TiCl<sub>2</sub>{(O-2,4-R<sub>2</sub>C<sub>6</sub>H<sub>2</sub>)-6-CH<sub>2</sub>}]<sub>3</sub>N [R = Me, Cp' = Cp (1); R = 'Bu, Cp' = Cp (4), Cp\* (5), 1,2,4-Me<sub>3</sub>C<sub>5</sub>H<sub>2</sub> (7)], [Cp'TiCl<sub>2</sub>{(O-2,4-Me<sub>2</sub>C<sub>6</sub>H<sub>2</sub>)-6-CH<sub>2</sub>}]<sub>2</sub>[Cp'TiCl{(O-2,4-Me<sub>2</sub>C<sub>6</sub>H<sub>2</sub>)-6-CH<sub>2</sub>}]<sub>2</sub>N [Cp' = Cp\* (2), 1,2,4-Me<sub>3</sub>C<sub>5</sub>H<sub>2</sub> (3)], and [Cp\*TiMe<sub>2</sub>{(O-2,4-R<sub>2</sub>C<sub>6</sub>H<sub>2</sub>)-6-CH<sub>2</sub>}]<sub>3</sub>N [R = Me (8), 'Bu (9)].**

**Table S5.** Crystal data and collection parameters of [Cp'TiCl<sub>2</sub>{(O-2,4-R<sub>2</sub>C<sub>6</sub>H<sub>2</sub>)-6-CH<sub>2</sub>}]<sub>3</sub>N [R = Me, Cp' = Cp (1); R = 'Bu, Cp' = Cp (4)], [Cp'TiCl<sub>2</sub>{(O-2,4-Me<sub>2</sub>C<sub>6</sub>H<sub>2</sub>)-6-CH<sub>2</sub>}]

|                                                              | <b>1</b>                                                                        | <b>2</b>                                                                        | <b>3</b>                                                                        | <b>4</b>                                                                        |
|--------------------------------------------------------------|---------------------------------------------------------------------------------|---------------------------------------------------------------------------------|---------------------------------------------------------------------------------|---------------------------------------------------------------------------------|
| Formula                                                      | C <sub>42</sub> H <sub>45</sub> Cl <sub>6</sub> NO <sub>3</sub> Ti <sub>3</sub> | C <sub>47</sub> H <sub>60</sub> Cl <sub>3</sub> NO <sub>3</sub> Ti <sub>2</sub> | C <sub>43</sub> H <sub>52</sub> Cl <sub>3</sub> NO <sub>3</sub> Ti <sub>2</sub> | C <sub>60</sub> H <sub>81</sub> Cl <sub>6</sub> NO <sub>3</sub> Ti <sub>3</sub> |
| Formula weight                                               | 968.24                                                                          | 889.15                                                                          | 833.05                                                                          | 1220.72                                                                         |
| Crystal color, Habit                                         | orange, block                                                                   | red, platelet                                                                   | red, block                                                                      | orange, block                                                                   |
| Crystal size (mm)                                            | 0.250×0.250×0.160                                                               | 0.210×0.200×0.060                                                               | 0.200×0.180×0.130                                                               | 0.120×0.080×0.070                                                               |
| Crystal system                                               | trigonal                                                                        | monoclinic                                                                      | monoclinic                                                                      | trigonal                                                                        |
| Space group                                                  | R-3c (#167)                                                                     | P21/c (#14)                                                                     | P21/c (#14)                                                                     | R-3 (#148)                                                                      |
| <i>a</i> (Å)                                                 | 16.059(2)                                                                       | 14.275(7)                                                                       | 16.6846(7)                                                                      | 24.4075(13)                                                                     |
| <i>b</i> (Å)                                                 |                                                                                 | 22.520(10)                                                                      | 18.4587(6)                                                                      |                                                                                 |
| <i>c</i> (Å)                                                 | 63.922(6)                                                                       | 14.984(7)                                                                       | 14.6183 (7)                                                                     | 23.4369(16)                                                                     |
| <i>α</i> (deg)                                               |                                                                                 |                                                                                 |                                                                                 |                                                                                 |
| <i>β</i> (deg)                                               |                                                                                 | 100.408(6)                                                                      | 114.144(5)                                                                      |                                                                                 |
| <i>γ</i> (deg)                                               |                                                                                 |                                                                                 |                                                                                 |                                                                                 |
| <i>V</i> (Å <sup>3</sup> )                                   | 14276(3)                                                                        | 4738(4)                                                                         | 4108.2(3)                                                                       | 12091.4(12)                                                                     |
| Z value                                                      | 12                                                                              | 4                                                                               | 4                                                                               | 6                                                                               |
| <i>D</i> <sub>calcd</sub> (g/cm <sup>3</sup> )               | 1.351                                                                           | 1.246                                                                           | 1.347                                                                           | 1.006                                                                           |
| <i>F</i> <sub>000</sub>                                      | 5952                                                                            | 1872                                                                            | 1744                                                                            | 3840                                                                            |
| Temp (K)                                                     | 93                                                                              | 93                                                                              | 93                                                                              | 93                                                                              |
| <i>μ</i> (MoK $\alpha$ ) (cm <sup>-1</sup> )                 | 8.635                                                                           | 5.443                                                                           | 6.228                                                                           | 5.211                                                                           |
| No. of reflections measured ( <i>R</i> <sub>int</sub> )      | 47281                                                                           | 49820                                                                           | 43125                                                                           | 43023                                                                           |
| 2 $\theta$ <sub>max</sub> (deg)                              | 55.0                                                                            | 55.0                                                                            | 55.0                                                                            | 55.0                                                                            |
| No. of observations [ <i>I</i> > 2.00 $\sigma$ ( <i>I</i> )] | 3657                                                                            | 10837                                                                           | 9423                                                                            | 6172                                                                            |
| No. of variables                                             | 166                                                                             | 505                                                                             | 469                                                                             | 220                                                                             |
| <i>R</i> 1 [ <i>I</i> > 2.00 $\sigma$ ( <i>I</i> )]          | 0.0982                                                                          | 0.0721                                                                          | 0.0553                                                                          | 0.075                                                                           |
| <i>wR</i> 2 [ <i>I</i> > 2.00 $\sigma$ ( <i>I</i> )]         | 0.222                                                                           | 0.2152                                                                          | 0.1477                                                                          | 0.2317                                                                          |
| Goodness of Fit                                              | 1.096                                                                           | 1.063                                                                           | 1.037                                                                           | 0.984                                                                           |

[Cp'TiCl{(O-2,4-Me<sub>2</sub>C<sub>6</sub>H<sub>2</sub>)-6-CH<sub>2</sub>}]<sub>2</sub>N [Cp' = Cp\* (2), 1,2,4-Me<sub>3</sub>C<sub>5</sub>H<sub>2</sub> (3)].

**Table S6.** Crystal data and collection parameters of [Cp'TiCl<sub>2</sub>{(O-2,4-R<sub>2</sub>C<sub>6</sub>H<sub>2</sub>)-6-CH<sub>2</sub>}]<sub>3</sub>N [R = <sup>t</sup>Bu, Cp' = Cp\* (**5**), 1,2,4-Me<sub>3</sub>C<sub>5</sub>H<sub>2</sub> (**7**)] and [Cp\*TiMe<sub>2</sub>{(O-2,4-R<sub>2</sub>C<sub>6</sub>H<sub>2</sub>)-6-CH<sub>2</sub>}]<sub>3</sub>N [R = <sup>t</sup>Bu (**9**)].

|                                                                 | <b>5</b>                                                                         | <b>7</b>                                                                        | <b>9</b>                                                         |
|-----------------------------------------------------------------|----------------------------------------------------------------------------------|---------------------------------------------------------------------------------|------------------------------------------------------------------|
| Formula                                                         | C <sub>75</sub> H <sub>111</sub> Cl <sub>6</sub> NO <sub>3</sub> Ti <sub>3</sub> | C <sub>69</sub> H <sub>99</sub> Cl <sub>6</sub> NO <sub>3</sub> Ti <sub>3</sub> | C <sub>81</sub> H <sub>129</sub> NO <sub>3</sub> Ti <sub>3</sub> |
| Formula weight                                                  | 1431.12                                                                          | 1346.96                                                                         | 1308.62                                                          |
| Crystal color, Habit                                            | red, block                                                                       | red, plate                                                                      | orange, block                                                    |
| Crystal size (mm)                                               | 0.230×0.190×0.100                                                                | 0.330×0.130×0.050                                                               | 0.108×0.090×0.046                                                |
| Crystal system                                                  | monoclinic                                                                       | monoclinic                                                                      | monoclinic                                                       |
| Space group                                                     | P21/n (#14)                                                                      | P21/n (#14)                                                                     | P21/n (#14)                                                      |
| <i>a</i> (Å)                                                    | 17.5836(9)                                                                       | 13.2258(6)                                                                      | 19.9129(4)                                                       |
| <i>b</i> (Å)                                                    | 22.4075(10)                                                                      | 22.4804(11)                                                                     | 19.9654(3)                                                       |
| <i>c</i> (Å)                                                    | 21.6663(10)                                                                      | 24.4338(12)                                                                     | 20.1690(4)                                                       |
| <i>α</i> (deg)                                                  |                                                                                  |                                                                                 |                                                                  |
| <i>β</i> (deg)                                                  | 94.814(4)                                                                        | 99.642(4)                                                                       | 98.7979(19)                                                      |
| <i>γ</i> (deg)                                                  |                                                                                  |                                                                                 |                                                                  |
| <i>V</i> (Å <sup>3</sup> )                                      | 8506.5(7)                                                                        | 7162.1(6)                                                                       | 7924.2(3)                                                        |
| <i>Z</i> value                                                  | 4                                                                                | 4                                                                               | 4                                                                |
| <i>D</i> <sub>calcd</sub> (g/cm <sup>3</sup> )                  | 1.175                                                                            | 1.249                                                                           | 1.097                                                            |
| <i>F</i> <sub>000</sub>                                         | 3208                                                                             | 2848                                                                            | 2848                                                             |
| Temp (K)                                                        | 93                                                                               | 93                                                                              | 93                                                               |
| <i>μ</i> (MoK $\alpha$ ) (cm <sup>-1</sup> )                    | 5.068                                                                            | 5.929                                                                           | 3.388                                                            |
| No. of reflections measured<br>( <i>R</i> <sub>int</sub> )      | 89388                                                                            | 75160                                                                           | 65232                                                            |
| 2 $\theta$ <sub>max</sub> (deg)                                 | 55                                                                               | 55                                                                              | 55                                                               |
| No. of observations [ <i>I</i> ><br>2.00 $\sigma$ ( <i>I</i> )] | 19531                                                                            | 16446                                                                           | 17594                                                            |
| No. of variables                                                | 838                                                                              | 739                                                                             | 805                                                              |
| <i>R</i> 1 [ <i>I</i> > 2.00 $\sigma$ ( <i>I</i> )]             | 0.0757                                                                           | 0.0571                                                                          | 0.0579                                                           |
| <i>wR</i> 2 [ <i>I</i> > 2.00 $\sigma$ ( <i>I</i> )]            | 0.2209                                                                           | 0.133                                                                           | 0.1774                                                           |
| Goodness of Fit                                                 | 0.945                                                                            | 1.012                                                                           | 1.008                                                            |

X-ray Structure Report

for

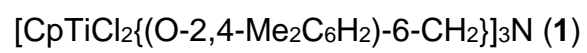

January 19, 2017

## Experimental

### Data Collection

An orange block crystal of  $C_{42}H_{45}Cl_6NO_3Ti_3$  having approximate dimensions of 0.250 x 0.250 x 0.160 mm was mounted on a glass fiber. All measurements were made on a Rigaku XtaLAB mini diffractometer using multi-layer mirror monochromated Mo-K $\alpha$  radiation.

The crystal-to-detector distance was 50.00 mm.

Cell constants and an orientation matrix for data collection corresponded to a R-centered trigonal cell (laue class:  $-3m1$ ) with dimensions:

$$\begin{aligned} a &= 16.059(2) \text{ \AA} \\ c &= 63.922(6) \text{ \AA} \\ V &= 14276(3) \text{ \AA}^3 \end{aligned}$$

For  $Z = 12$  and F.W. = 968.24, the calculated density is 1.351 g/cm<sup>3</sup>. Based on the reflection conditions of:

$$\begin{aligned} hki: & -h+k+l = 3n \\ h-h0l: & l = 2n \end{aligned}$$

packing considerations, a statistical analysis of intensity distribution, and the successful solution and refinement of the structure, the space group was determined to be:

R-3c(h) (#167)

The data were collected at a temperature of  $-180 \pm 1^\circ\text{C}$  to a maximum  $2\theta$  value of  $65.2^\circ$ . A total of 540 oscillation images were collected. A sweep of data was done using  $\omega$  scans from  $-60.0$  to  $120.0^\circ$  in  $1.00^\circ$  step, at  $\chi=54.0^\circ$  and  $\phi = 0.0^\circ$ . The exposure rate was 32.0 [sec./ $^\circ$ ]. The detector swing angle was  $30.00^\circ$ . A second sweep was performed using  $\omega$  scans from  $-60.0$  to  $120.0^\circ$  in  $1.00^\circ$  step, at  $\chi=54.0^\circ$  and  $\phi = 120.0^\circ$ . The exposure rate was 32.0 [sec./ $^\circ$ ]. The detector swing angle was  $30.00^\circ$ . Another sweep was performed using  $\omega$  scans from  $-60.0$  to  $120.0^\circ$  in  $1.00^\circ$  step, at  $\chi=54.0^\circ$  and  $\phi = 240.0^\circ$ . The exposure rate was 32.0 [sec./ $^\circ$ ]. The detector swing angle

was 30.00°. The crystal-to-detector distance was 50.00 mm. Readout was performed in the 0.073 mm pixel mode.

### Data Reduction

Of the 0 reflections were collected, where 0 were unique ( $R_{\text{int}} = 0.1014$ ); equivalent reflections were merged. Data were collected and processed using CrysAlisPro (Rigaku Oxford Diffraction).<sup>1</sup>

The linear absorption coefficient,  $\mu$ , for Mo-K $\alpha$  radiation is 8.635 cm<sup>-1</sup>. An empirical absorption correction was applied which resulted in transmission factors ranging from 0.471 to 0.871. The data were corrected for Lorentz and polarization effects.

### Structure Solution and Refinement

The structure was solved by direct methods<sup>2</sup> and expanded using Fourier techniques. The non-hydrogen atoms were refined anisotropically. Hydrogen atoms were refined using the riding model. The final cycle of full-matrix least-squares refinement<sup>3</sup> on  $F^2$  was based on 3657 observed reflections and 166 variable parameters and converged (largest parameter shift was 0.00 times its esd) with unweighted and weighted agreement factors of:

$$R1 = \sum ||F_o| - |F_c|| / \sum |F_o| = 0.0982$$

$$wR2 = [ \sum ( w (F_o^2 - F_c^2)^2 ) / \sum w(F_o^2)^2 ]^{1/2} = 0.2220$$

The goodness of fit<sup>4</sup> was 1.10. Unit weights were used. The maximum and minimum peaks on the final difference Fourier map corresponded to 0.61 and -1.14 e<sup>-</sup>/Å<sup>3</sup>, respectively.

Neutral atom scattering factors were taken from International Tables for Crystallography (IT), Vol. C, Table 6.1.1.4<sup>5</sup>. Anomalous dispersion effects were included in  $F_{\text{calc}}$ <sup>6</sup>; the values for  $\Delta f'$  and  $\Delta f''$  were those of Creagh and McAuley<sup>7</sup>. The values for the mass attenuation coefficients are those of Creagh and Hubbell<sup>8</sup>. All calculations were performed using the CrystalStructure<sup>9</sup> crystallographic software package except for refinement, which was performed using SHELXL Version 2014/7<sup>10</sup>.

## References

(1) CrysAlisPro: Data Collection and Processing Software, Rigaku Corporation (2015). Tokyo 196-8666, Japan.

(2) SHELXT Version 2014/5: Sheldrick, G. M. (2014). Acta Cryst. A70, C1437.

(3) Least Squares function minimized: (SHELXL Version 2014/7)

$$\sum w(F_o^2 - F_c^2)^2 \quad \text{where } w = \text{Least Squares weights.}$$

(4) Goodness of fit is defined as:

$$[\sum w(F_o^2 - F_c^2)^2 / (N_o - N_v)]^{1/2}$$

where:  $N_o$  = number of observations  
 $N_v$  = number of variables

(5) International Tables for Crystallography, Vol.C (1992). Ed. A.J.C. Wilson, Kluwer Academic Publishers, Dordrecht, Netherlands, Table 6.1.1.4, pp. 572.

(6) Ibers, J. A. & Hamilton, W. C.; Acta Crystallogr., 17, 781 (1964).

(7) Creagh, D. C. & McAuley, W.J. ; "International Tables for Crystallography", Vol C, (A.J.C. Wilson, ed.), Kluwer Academic Publishers, Boston, Table 4.2.6.8, pages 219-222 (1992).

(8) Creagh, D. C. & Hubbell, J.H.; "International Tables for Crystallography", Vol C, (A.J.C. Wilson, ed.), Kluwer Academic Publishers, Boston, Table 4.2.4.3, pages 200-206 (1992).

(9) CrystalStructure 4.2: Crystal Structure Analysis Package, Rigaku Corporation (2000-2015). Tokyo 196-8666, Japan.

(10) SHELXL Version 2014/7: Sheldrick, G. M. (2008). Acta Cryst. A64, 112-122.



## EXPERIMENTAL DETAILS

### A. Crystal Data

|                         |                                                                                            |
|-------------------------|--------------------------------------------------------------------------------------------|
| Empirical Formula       | $C_{42}H_{45}Cl_6NO_3Ti_3$                                                                 |
| Formula Weight          | 968.24                                                                                     |
| Crystal Color, Habit    | orange, block                                                                              |
| Crystal Dimensions      | 0.250 X 0.250 X 0.160 mm                                                                   |
| Crystal System          | trigonal                                                                                   |
| Lattice Type            | R-centered                                                                                 |
| Lattice Parameters      | $a = 16.059(2) \text{ \AA}$<br>$c = 63.922(6) \text{ \AA}$<br>$V = 14276(3) \text{ \AA}^3$ |
| Space Group             | R-3c (#167)                                                                                |
| Z value                 | 12                                                                                         |
| $D_{\text{calc}}$       | $1.351 \text{ g/cm}^3$                                                                     |
| $F_{000}$               | 5952.00                                                                                    |
| $\mu(\text{MoK}\alpha)$ | $8.635 \text{ cm}^{-1}$                                                                    |

## B. Intensity Measurements

|                                                        |                                                                                      |
|--------------------------------------------------------|--------------------------------------------------------------------------------------|
| Diffractometer                                         | XtaLAB mini                                                                          |
| Radiation                                              | MoK $\alpha$ ( $\lambda = 0.71073 \text{ \AA}$ )<br>multi-layer mirror monochromated |
| Voltage, Current                                       | 50kV, 24mA                                                                           |
| Temperature                                            | -180.0 $^{\circ}$ C                                                                  |
| Detector Aperture                                      | 75.0 mm (diameter)                                                                   |
| Data Images                                            | 540 exposures                                                                        |
| $\omega$ oscillation Range ( $\chi=54.0, \phi=0.0$ )   | -60.0 - 120.0 $^{\circ}$                                                             |
| Exposure Rate                                          | 32.0 sec./ $^{\circ}$                                                                |
| Detector Swing Angle                                   | 30.00 $^{\circ}$                                                                     |
| $\omega$ oscillation Range ( $\chi=54.0, \phi=120.0$ ) | -60.0 - 120.0 $^{\circ}$                                                             |
| Exposure Rate                                          | 32.0 sec./ $^{\circ}$                                                                |
| Detector Swing Angle                                   | 30.00 $^{\circ}$                                                                     |
| $\omega$ oscillation Range ( $\chi=54.0, \phi=240.0$ ) | -60.0 - 120.0 $^{\circ}$                                                             |
| Exposure Rate                                          | 32.0 sec./ $^{\circ}$                                                                |
| Detector Swing Angle                                   | 30.00 $^{\circ}$                                                                     |
| Detector Position                                      | 50.00 mm                                                                             |
| Pixel Size                                             | 0.073 mm                                                                             |
| $2\theta_{\max}$                                       | 55.0 $^{\circ}$                                                                      |
| No. of Reflections Measured                            | Total: 47281                                                                         |

Corrections

Unique: 3657 ( $R_{\text{int}} = 0.1014$ )

Lorentz-polarization

Absorption

(trans. factors: 0.471 - 0.871)

### C. Structure Solution and Refinement

|                                     |                                                                                                                          |
|-------------------------------------|--------------------------------------------------------------------------------------------------------------------------|
| Structure Solution<br>2014/5)       | Direct Methods (SHELXT Version                                                                                           |
| Refinement                          | Full-matrix least-squares on F <sup>2</sup>                                                                              |
| Function Minimized                  | $\sum w (F_o^2 - F_c^2)^2$                                                                                               |
| Least Squares Weights               | $w = 1 / [ \sigma^2(F_o^2) + (0.0449 \cdot P)^2 + 338.0268 \cdot P ]$<br>where $P = (\text{Max}(F_o^2, 0) + 2F_c^2) / 3$ |
| 2 $\theta_{\text{max}}$ cutoff      | 55.0 <sup>o</sup>                                                                                                        |
| Anomalous Dispersion                | All non-hydrogen atoms                                                                                                   |
| No. Observations (All reflections)  | 3657                                                                                                                     |
| No. Variables                       | 166                                                                                                                      |
| Reflection/Parameter Ratio          | 22.03                                                                                                                    |
| Residuals: R1 (I>2.00 $\sigma$ (I)) | 0.0982                                                                                                                   |
| Residuals: R (All reflections)      | 0.1259                                                                                                                   |
| Residuals: wR2 (All reflections)    | 0.2220                                                                                                                   |
| Goodness of Fit Indicator           | 1.096                                                                                                                    |
| Max Shift/Error in Final Cycle      | 0.000                                                                                                                    |
| Maximum peak in Final Diff. Map     | 0.61 e <sup>-</sup> /Å <sup>3</sup>                                                                                      |
| Minimum peak in Final Diff. Map     | -1.14 e <sup>-</sup> /Å <sup>3</sup>                                                                                     |

Table S7-1. Atomic coordinates and  $B_{\text{iso}}/B_{\text{eq}}$  and occupancy

| atom | x           | y           | z           | $B_{\text{eq}}$ | occ |
|------|-------------|-------------|-------------|-----------------|-----|
| Ti1  | 0.10567(9)  | 0.39766(9)  | 0.46057(2)  | 3.16(3)         | 1   |
| Cl1  | 0.05200(17) | 0.24779(17) | 0.44836(3)  | 5.19(5)         | 1   |
| Cl2  | 0.24579(14) | 0.48561(18) | 0.44358(2)  | 5.01(5)         | 1   |
| O1   | 0.1440(3)   | 0.3950(3)   | 0.48670(5)  | 3.06(8)         | 1   |
| N1   | 0.33333     | 0.66667     | 0.51144(11) | 2.39(14)        | 1/3 |
| C1   | 0.2969(5)   | 0.5680(4)   | 0.50426(8)  | 2.80(11)        | 1   |
| C2   | 0.2109(5)   | 0.4955(5)   | 0.51663(8)  | 2.72(11)        | 1   |
| C3   | 0.1397(5)   | 0.4092(5)   | 0.50783(8)  | 2.89(11)        | 1   |
| C4   | 0.0659(5)   | 0.3379(5)   | 0.51960(9)  | 3.25(12)        | 1   |
| C5   | 0.0618(5)   | 0.3545(5)   | 0.54089(9)  | 3.23(12)        | 1   |
| C6   | 0.1293(5)   | 0.4399(4)   | 0.55009(8)  | 2.80(11)        | 1   |
| C7   | 0.2032(5)   | 0.5098(4)   | 0.53813(8)  | 2.68(10)        | 1   |
| C8   | 0.1255(6)   | 0.4572(5)   | 0.57326(8)  | 3.76(14)        | 1   |
| C9   | -0.0074(6)  | 0.2437(6)   | 0.50973(11) | 4.50(15)        | 1   |
| C10  | -0.0035(5)  | 0.4343(5)   | 0.47604(9)  | 3.45(13)        | 1   |
| C11  | -0.0537(5)  | 0.3632(6)   | 0.46098(10) | 4.05(15)        | 1   |
| C12  | -0.0150(5)  | 0.4056(6)   | 0.44122(9)  | 4.23(16)        | 1   |
| C13  | 0.0583(5)   | 0.4992(6)   | 0.44436(10) | 3.79(13)        | 1   |
| C14  | 0.0674(5)   | 0.5182(5)   | 0.46590(9)  | 3.47(12)        | 1   |

$$B_{\text{eq}} = 8/3 \pi^2 (U_{11}(aa^*)^2 + U_{22}(bb^*)^2 + U_{33}(cc^*)^2 + 2U_{12}(aa^*bb^*)\cos \gamma + 2U_{13}(aa^*cc^*)\cos \beta + 2U_{23}(bb^*cc^*)\cos \alpha)$$

Table S7-2. Atomic coordinates and  $B_{\text{iso}}$  involving hydrogen atoms

| atom | x        | y       | z       | $B_{\text{iso}}$ | occ |
|------|----------|---------|---------|------------------|-----|
| H1A  | 0.34887  | 0.55200 | 0.50538 | 3.365            | 1   |
| H1B  | 0.27880  | 0.56343 | 0.48932 | 3.365            | 1   |
| H5   | 0.01183  | 0.30645 | 0.54920 | 3.871            | 1   |
| H7   | 0.24939  | 0.56825 | 0.54453 | 3.217            | 1   |
| H8A  | 0.17858  | 0.52105 | 0.57695 | 4.515            | 1   |
| H8B  | 0.06415  | 0.45346 | 0.57660 | 4.515            | 1   |
| H8C  | 0.13122  | 0.40816 | 0.58124 | 4.515            | 1   |
| H9A  | -0.05363 | 0.20250 | 0.52037 | 5.405            | 1   |
| H9B  | -0.04135 | 0.25617 | 0.49853 | 5.405            | 1   |
| H9C  | 0.02544  | 0.21129 | 0.50391 | 5.405            | 1   |
| H10  | -0.01936 | 0.42865 | 0.49129 | 4.134            | 1   |
| H11  | -0.11189 | 0.29885 | 0.46345 | 4.857            | 1   |
| H12  | -0.04028 | 0.37479 | 0.42731 | 5.071            | 1   |
| H13  | 0.09454  | 0.54702 | 0.43310 | 4.549            | 1   |
| H14  | 0.10955  | 0.58199 | 0.47264 | 4.160            | 1   |

Table S7-3. Anisotropic displacement parameters

| atom | U <sub>11</sub> | U <sub>22</sub> | U <sub>33</sub> | U <sub>12</sub> | U <sub>13</sub> | U <sub>23</sub> |
|------|-----------------|-----------------|-----------------|-----------------|-----------------|-----------------|
| Ti1  | 0.0452(7)       | 0.0625(8)       | 0.0161(4)       | 0.0297(6)       | -0.0013(4)      | -0.0059(5)      |
| Cl1  | 0.0917(16)      | 0.0859(15)      | 0.0356(9)       | 0.0565(13)      | -0.0161(9)      | -0.0197(9)      |
| Cl2  | 0.0530(11)      | 0.1152(18)      | 0.0243(7)       | 0.0437(12)      | 0.0036(7)       | 0.0033(9)       |
| O1   | 0.046(3)        | 0.059(3)        | 0.0145(17)      | 0.029(2)        | -0.0029(16)     | -0.0026(17)     |
| N1   | 0.036(3)        | 0.036(3)        | 0.019(3)        | 0.0179(14)      | 0.00000         | 0.00000         |
| C1   | 0.043(3)        | 0.044(3)        | 0.017(2)        | 0.020(3)        | 0.002(2)        | -0.002(2)       |
| C2   | 0.046(4)        | 0.042(3)        | 0.017(2)        | 0.023(3)        | 0.001(2)        | -0.002(2)       |
| C3   | 0.047(4)        | 0.052(4)        | 0.014(2)        | 0.026(3)        | -0.004(2)       | -0.001(2)       |
| C4   | 0.048(4)        | 0.051(4)        | 0.025(3)        | 0.025(3)        | -0.001(3)       | 0.001(3)        |
| C5   | 0.046(4)        | 0.048(4)        | 0.023(3)        | 0.019(3)        | 0.008(2)        | 0.011(3)        |
| C6   | 0.050(4)        | 0.037(3)        | 0.022(3)        | 0.024(3)        | 0.004(2)        | 0.004(2)        |
| C7   | 0.044(3)        | 0.038(3)        | 0.018(2)        | 0.019(3)        | 0.004(2)        | 0.001(2)        |
| C8   | 0.072(5)        | 0.047(4)        | 0.021(3)        | 0.028(4)        | 0.010(3)        | 0.008(3)        |
| C9   | 0.061(5)        | 0.062(5)        | 0.038(3)        | 0.023(4)        | 0.004(3)        | 0.003(3)        |
| C10  | 0.057(4)        | 0.064(5)        | 0.022(3)        | 0.040(4)        | 0.002(3)        | -0.005(3)       |
| C11  | 0.038(4)        | 0.080(5)        | 0.038(3)        | 0.031(4)        | -0.002(3)       | -0.011(3)       |
| C12  | 0.053(4)        | 0.102(6)        | 0.021(3)        | 0.051(5)        | -0.009(3)       | -0.013(3)       |
| C13  | 0.054(4)        | 0.066(5)        | 0.031(3)        | 0.035(4)        | -0.001(3)       | 0.007(3)        |
| C14  | 0.054(4)        | 0.058(4)        | 0.029(3)        | 0.035(4)        | -0.006(3)       | -0.009(3)       |

The general temperature factor expression:  $\exp(-2\pi^2(a^2U_{11}h^2 + b^2U_{22}k^2 + c^2U_{33}l^2 + 2a*b*U_{12}hk + 2a*c*U_{13}hl + 2b*c*U_{23}kl))$

Table S7-4. Bond lengths (Å)

| atom | atom            | distance  | atom | atom            | distance  |
|------|-----------------|-----------|------|-----------------|-----------|
| Ti1  | Cl1             | 2.252(3)  | Ti1  | Cl2             | 2.249(2)  |
| Ti1  | O1              | 1.788(4)  | Ti1  | C10             | 2.330(9)  |
| Ti1  | C11             | 2.333(9)  | Ti1  | C12             | 2.356(9)  |
| Ti1  | C13             | 2.357(10) | Ti1  | C14             | 2.330(10) |
| O1   | C3              | 1.377(6)  | N1   | C1              | 1.462(7)  |
| N1   | C1 <sup>1</sup> | 1.462(7)  | N1   | C1 <sup>2</sup> | 1.462(7)  |
| C1   | C2              | 1.510(7)  | C2   | C3              | 1.400(8)  |
| C2   | C7              | 1.409(8)  | C3   | C4              | 1.387(8)  |
| C4   | C5              | 1.395(8)  | C4   | C9              | 1.514(9)  |
| C5   | C6              | 1.384(8)  | C6   | C7              | 1.386(7)  |
| C6   | C8              | 1.514(8)  | C10  | C11             | 1.400(9)  |
| C10  | C14             | 1.414(9)  | C11  | C12             | 1.422(9)  |
| C12  | C13             | 1.384(10) | C13  | C14             | 1.402(9)  |

Symmetry Operators:

(1) -Y+1,X-Y+1,Z

(2) -X+Y,-X+1,Z



Table S7-5. Bond lengths involving hydrogens (Å)

| atom | atom | distance | atom | atom | distance |
|------|------|----------|------|------|----------|
| C1   | H1A  | 0.990    | C1   | H1B  | 0.990    |
| C5   | H5   | 0.950    | C7   | H7   | 0.950    |
| C8   | H8A  | 0.980    | C8   | H8B  | 0.980    |
| C8   | H8C  | 0.980    | C9   | H9A  | 0.980    |
| C9   | H9B  | 0.980    | C9   | H9C  | 0.980    |
| C10  | H10  | 1.000    | C11  | H11  | 1.000    |
| C12  | H12  | 1.000    | C13  | H13  | 1.000    |
| C14  | H14  | 1.000    |      |      |          |

Table S7-6. Bond angles ( $^{\circ}$ )

| atom | atom | atom            | angle      | atom            | atom | atom            | angle      |
|------|------|-----------------|------------|-----------------|------|-----------------|------------|
| Cl1  | Ti1  | Cl2             | 103.41(11) | Cl1             | Ti1  | O1              | 104.50(19) |
| Cl1  | Ti1  | C10             | 118.85(17) | Cl1             | Ti1  | C11             | 87.8(2)    |
| Cl1  | Ti1  | C12             | 89.5(2)    | Cl1             | Ti1  | C13             | 120.25(18) |
| Cl1  | Ti1  | C14             | 145.03(19) | Cl2             | Ti1  | O1              | 102.58(15) |
| Cl2  | Ti1  | C10             | 133.6(2)   | Cl2             | Ti1  | C11             | 142.1(2)   |
| Cl2  | Ti1  | C12             | 107.72(17) | Cl2             | Ti1  | C13             | 85.47(19)  |
| Cl2  | Ti1  | C14             | 98.37(18)  | O1              | Ti1  | C10             | 85.5(3)    |
| O1   | Ti1  | C11             | 109.5(2)   | O1              | Ti1  | C12             | 142.6(3)   |
| O1   | Ti1  | C13             | 131.4(3)   | O1              | Ti1  | C14             | 96.9(3)    |
| C10  | Ti1  | C11             | 34.9(2)    | C10             | Ti1  | C12             | 57.7(3)    |
| C10  | Ti1  | C13             | 57.8(3)    | C10             | Ti1  | C14             | 35.3(2)    |
| C11  | Ti1  | C12             | 35.3(2)    | C11             | Ti1  | C13             | 58.2(3)    |
| C11  | Ti1  | C14             | 58.8(3)    | C12             | Ti1  | C13             | 34.1(3)    |
| C12  | Ti1  | C14             | 57.7(3)    | C13             | Ti1  | C14             | 34.8(2)    |
| Ti1  | O1   | C3              | 149.9(6)   | C1              | N1   | C1 <sup>1</sup> | 110.6(5)   |
| C1   | N1   | C1 <sup>2</sup> | 110.6(5)   | C1 <sup>1</sup> | N1   | C1 <sup>2</sup> | 110.6(5)   |
| N1   | C1   | C2              | 112.8(6)   | C1              | C2   | C3              | 122.2(5)   |
| C1   | C2   | C7              | 120.4(5)   | C3              | C2   | C7              | 117.3(5)   |
| O1   | C3   | C2              | 118.3(5)   | O1              | C3   | C4              | 119.2(5)   |
| C2   | C3   | C4              | 122.5(5)   | C3              | C4   | C5              | 118.3(5)   |
| C3   | C4   | C9              | 121.0(5)   | C5              | C4   | C9              | 120.7(5)   |
| C4   | C5   | C6              | 121.0(5)   | C5              | C6   | C7              | 119.8(5)   |
| C5   | C6   | C8              | 120.9(5)   | C7              | C6   | C8              | 119.2(5)   |
| C2   | C7   | C6              | 121.0(5)   | Ti1             | C10  | C11             | 72.7(5)    |
| Ti1  | C10  | C14             | 72.3(5)    | C11             | C10  | C14             | 108.8(5)   |
| Ti1  | C11  | C10             | 72.4(5)    | Ti1             | C11  | C12             | 73.2(5)    |
| C10  | C11  | C12             | 106.5(6)   | Ti1             | C12  | C11             | 71.5(5)    |
| Ti1  | C12  | C13             | 72.9(5)    | C11             | C12  | C13             | 108.8(6)   |
| Ti1  | C13  | C12             | 72.9(6)    | Ti1             | C13  | C14             | 71.6(6)    |
| C12  | C13  | C14             | 108.6(6)   | Ti1             | C14  | C10             | 72.3(6)    |
| Ti1  | C14  | C13             | 73.6(6)    | C10             | C14  | C13             | 107.2(5)   |

Symmetry Operators:

(1)  $-Y+1, X-Y+1, Z$ (2)  $-X+Y, -X+1, Z$

Table S7-7. Bond angles involving hydrogens ( $^{\circ}$ )

| atom | atom | atom | angle | atom | atom | atom | angle |
|------|------|------|-------|------|------|------|-------|
| N1   | C1   | H1A  | 109.0 | N1   | C1   | H1B  | 109.0 |
| C2   | C1   | H1A  | 109.0 | C2   | C1   | H1B  | 109.0 |
| H1A  | C1   | H1B  | 107.8 | C4   | C5   | H5   | 119.5 |
| C6   | C5   | H5   | 119.5 | C2   | C7   | H7   | 119.5 |
| C6   | C7   | H7   | 119.5 | C6   | C8   | H8A  | 109.5 |
| C6   | C8   | H8B  | 109.5 | C6   | C8   | H8C  | 109.5 |
| H8A  | C8   | H8B  | 109.5 | H8A  | C8   | H8C  | 109.5 |
| H8B  | C8   | H8C  | 109.5 | C4   | C9   | H9A  | 109.5 |
| C4   | C9   | H9B  | 109.5 | C4   | C9   | H9C  | 109.5 |
| H9A  | C9   | H9B  | 109.5 | H9A  | C9   | H9C  | 109.5 |
| H9B  | C9   | H9C  | 109.5 | Ti1  | C10  | H10  | 125.5 |
| C11  | C10  | H10  | 125.5 | C14  | C10  | H10  | 125.5 |
| Ti1  | C11  | H11  | 126.4 | C10  | C11  | H11  | 126.4 |
| C12  | C11  | H11  | 126.4 | Ti1  | C12  | H12  | 125.5 |
| C11  | C12  | H12  | 125.5 | C13  | C12  | H12  | 125.5 |
| Ti1  | C13  | H13  | 125.6 | C12  | C13  | H13  | 125.6 |
| C14  | C13  | H13  | 125.6 | Ti1  | C14  | H14  | 126.1 |
| C10  | C14  | H14  | 126.1 | C13  | C14  | H14  | 126.1 |

Table S7-8. Torsion Angles(°)

(Those having bond angles &gt; 160 or &lt; 20 degrees are excluded.)

| atom1 | atom2 | atom3 | atom4 | angle       | atom1 | atom2 | atom3 | atom4 | angle     |
|-------|-------|-------|-------|-------------|-------|-------|-------|-------|-----------|
| Cl1   | Ti1   | O1    | C3    | -124.7(5)   | Cl1   | Ti1   | C10   | C11   | -30.2(4)  |
| Cl1   | Ti1   | C10   | C14   | -147.23(17) | Cl1   | Ti1   | C11   | C10   | 153.8(3)  |
| Cl1   | Ti1   | C11   | C12   | -92.1(3)    | Cl1   | Ti1   | C12   | C11   | 87.0(3)   |
| Cl1   | Ti1   | C12   | C13   | -155.7(3)   | Cl1   | Ti1   | C13   | C12   | 28.4(4)   |
| Cl1   | Ti1   | C13   | C14   | 145.40(18)  | Cl1   | Ti1   | C14   | C10   | 55.8(4)   |
| Cl1   | Ti1   | C14   | C13   | -58.9(4)    | Cl2   | Ti1   | O1    | C3    | 127.6(5)  |
| Cl2   | Ti1   | C10   | C11   | 122.6(2)    | Cl2   | Ti1   | C10   | C14   | 5.6(4)    |
| Cl2   | Ti1   | C11   | C10   | -96.9(3)    | Cl2   | Ti1   | C11   | C12   | 17.1(6)   |
| Cl2   | Ti1   | C12   | C11   | -169.1(3)   | Cl2   | Ti1   | C12   | C13   | -51.8(3)  |
| Cl2   | Ti1   | C13   | C12   | 131.3(3)    | Cl2   | Ti1   | C13   | C14   | -111.7(2) |
| Cl2   | Ti1   | C14   | C10   | -175.9(2)   | Cl2   | Ti1   | C14   | C13   | 69.4(2)   |
| O1    | Ti1   | C10   | C11   | -134.3(3)   | O1    | Ti1   | C10   | C14   | 108.7(3)  |
| C10   | Ti1   | O1    | C3    | -6.0(6)     | O1    | Ti1   | C11   | C10   | 49.2(4)   |
| O1    | Ti1   | C11   | C12   | 163.3(3)    | C11   | Ti1   | O1    | C3    | -31.8(6)  |
| O1    | Ti1   | C12   | C11   | -26.5(6)    | O1    | Ti1   | C12   | C13   | 90.7(4)   |
| C12   | Ti1   | O1    | C3    | -15.9(8)    | O1    | Ti1   | C13   | C12   | -125.9(3) |
| O1    | Ti1   | C13   | C14   | -8.9(4)     | C13   | Ti1   | O1    | C3    | 32.5(7)   |
| O1    | Ti1   | C14   | C10   | -72.0(3)    | O1    | Ti1   | C14   | C13   | 173.3(2)  |
| C14   | Ti1   | O1    | C3    | 27.4(6)     | C10   | Ti1   | C11   | C10   | -0.0(3)   |
| C10   | Ti1   | C11   | C12   | 114.0(6)    | C11   | Ti1   | C10   | C11   | 0.0(4)    |
| C11   | Ti1   | C10   | C14   | -117.0(5)   | C10   | Ti1   | C12   | C11   | -38.2(3)  |
| C10   | Ti1   | C12   | C13   | 79.1(4)     | C12   | Ti1   | C10   | C11   | 38.6(3)   |
| C12   | Ti1   | C10   | C14   | -78.4(3)    | C10   | Ti1   | C13   | C12   | -78.6(3)  |
| C10   | Ti1   | C13   | C14   | 38.3(2)     | C13   | Ti1   | C10   | C11   | 79.3(3)   |
| C13   | Ti1   | C10   | C14   | -37.8(2)    | C10   | Ti1   | C14   | C10   | -0.0(3)   |
| C10   | Ti1   | C14   | C13   | -114.7(5)   | C14   | Ti1   | C10   | C11   | 117.0(5)  |
| C14   | Ti1   | C10   | C14   | -0.0(3)     | C11   | Ti1   | C12   | C11   | -0.0(4)   |
| C11   | Ti1   | C12   | C13   | 117.3(7)    | C12   | Ti1   | C11   | C10   | -114.0(7) |
| C12   | Ti1   | C11   | C12   | 0.0(4)      | C11   | Ti1   | C13   | C12   | -37.2(3)  |
| C11   | Ti1   | C13   | C14   | 79.8(3)     | C13   | Ti1   | C11   | C10   | -78.1(4)  |
| C13   | Ti1   | C11   | C12   | 35.9(3)     | C11   | Ti1   | C14   | C10   | 36.6(2)   |
| C11   | Ti1   | C14   | C13   | -78.1(3)    | C14   | Ti1   | C11   | C10   | -37.0(3)  |
| C14   | Ti1   | C11   | C12   | 77.0(4)     | C12   | Ti1   | C13   | C12   | -0.0(3)   |
| C12   | Ti1   | C13   | C14   | 117.0(5)    | C13   | Ti1   | C12   | C11   | -117.3(6) |
| C13   | Ti1   | C12   | C13   | -0.0(3)     | C12   | Ti1   | C14   | C10   | 78.4(3)   |
| C12   | Ti1   | C14   | C13   | -36.3(2)    | C14   | Ti1   | C12   | C11   | -80.3(4)  |
| C14   | Ti1   | C12   | C13   | 37.0(3)     | C13   | Ti1   | C14   | C10   | 114.7(5)  |

Table S7-8. Torsion angles ( $^{\circ}$ ) (continued)

| atom1           | atom2 | atom3           | atom4           | angle     | atom1           | atom2 | atom3           | atom4           | angle     |
|-----------------|-------|-----------------|-----------------|-----------|-----------------|-------|-----------------|-----------------|-----------|
| C13             | Ti1   | C14             | C13             | 0.0(3)    | C14             | Ti1   | C13             | C12             | -117.0(5) |
| C14             | Ti1   | C13             | C14             | 0.0(3)    | Ti1             | O1    | C3              | C2              | -98.2(8)  |
| Ti1             | O1    | C3              | C4              | 82.3(10)  | C1              | N1    | C1 <sup>1</sup> | C2 <sup>1</sup> | -76.0(6)  |
| C1 <sup>1</sup> | N1    | C1              | C2              | 161.0(5)  | C1              | N1    | C1 <sup>2</sup> | C2 <sup>2</sup> | 161.0(5)  |
| C1 <sup>2</sup> | N1    | C1              | C2              | -76.0(6)  | C1 <sup>1</sup> | N1    | C1 <sup>2</sup> | C2 <sup>2</sup> | -76.0(6)  |
| C1 <sup>2</sup> | N1    | C1 <sup>1</sup> | C2 <sup>1</sup> | 161.0(5)  | N1              | C1    | C2              | C3              | 150.4(6)  |
| N1              | C1    | C2              | C7              | -34.0(10) | C1              | C2    | C3              | O1              | -6.3(12)  |
| C1              | C2    | C3              | C4              | 173.2(7)  | C1              | C2    | C7              | C6              | -174.1(7) |
| C3              | C2    | C7              | C6              | 1.7(12)   | C7              | C2    | C3              | O1              | 177.9(7)  |
| C7              | C2    | C3              | C4              | -2.6(13)  | O1              | C3    | C4              | C5              | -178.8(7) |
| O1              | C3    | C4              | C9              | 2.3(13)   | C2              | C3    | C4              | C5              | 1.7(13)   |
| C2              | C3    | C4              | C9              | -177.2(7) | C3              | C4    | C5              | C6              | 0.1(13)   |
| C9              | C4    | C5              | C6              | 179.0(8)  | C4              | C5    | C6              | C7              | -1.0(13)  |
| C4              | C5    | C6              | C8              | -179.1(7) | C5              | C6    | C7              | C2              | 0.0(13)   |
| C8              | C6    | C7              | C2              | 178.2(7)  | Ti1             | C10   | C11             | Ti1             | 0.00(3)   |
| Ti1             | C10   | C11             | C12             | -65.8(5)  | Ti1             | C10   | C14             | Ti1             | -0.00(3)  |
| Ti1             | C10   | C14             | C13             | 65.9(6)   | C11             | C10   | C14             | Ti1             | -63.9(7)  |
| C11             | C10   | C14             | C13             | 1.9(11)   | C14             | C10   | C11             | Ti1             | 63.7(7)   |
| C14             | C10   | C11             | C12             | -2.1(11)  | Ti1             | C11   | C12             | Ti1             | -0.00(4)  |
| Ti1             | C11   | C12             | C13             | -63.8(6)  | C10             | C11   | C12             | Ti1             | 65.3(7)   |
| C10             | C11   | C12             | C13             | 1.4(11)   | Ti1             | C12   | C13             | Ti1             | -0.00(4)  |
| Ti1             | C12   | C13             | C14             | -63.1(6)  | C11             | C12   | C13             | Ti1             | 62.9(8)   |
| C11             | C12   | C13             | C14             | -0.2(12)  | Ti1             | C13   | C14             | Ti1             | -0.00(3)  |
| Ti1             | C13   | C14             | C10             | -65.0(6)  | C12             | C13   | C14             | Ti1             | 64.0(8)   |
| C12             | C13   | C14             | C10             | -1.0(11)  |                 |       |                 |                 |           |

Symmetry Operators:

(1) -Y+1,X-Y+1,Z

(2) -X+Y,-X+1,Z

Table S7-9. Intramolecular contacts less than 3.60 Å

| atom | atom            | distance | atom | atom            | distance  |
|------|-----------------|----------|------|-----------------|-----------|
| O1   | C1              | 2.861(6) | O1   | C9              | 2.842(8)  |
| N1   | C2 <sup>1</sup> | 2.476(6) | N1   | C2 <sup>2</sup> | 2.476(6)  |
| N1   | C7              | 2.891(7) | N1   | C7 <sup>1</sup> | 2.891(7)  |
| N1   | C7 <sup>2</sup> | 2.891(7) | C1   | C2 <sup>1</sup> | 3.075(9)  |
| C1   | C7 <sup>1</sup> | 3.482(8) | C2   | C5              | 2.801(8)  |
| C3   | C6              | 2.766(8) | C3   | C10             | 3.241(11) |
| C4   | C7              | 2.792(8) |      |                 |           |

Symmetry Operators:

(1)  $-Y+1, X-Y+1, Z$

(2)  $-X+Y, -X+1, Z$

Table S7-10. Intramolecular contacts less than 3.60 Å involving hydrogens

| atom | atom             | distance | atom | atom             | distance |
|------|------------------|----------|------|------------------|----------|
| Ti1  | H1B              | 3.285    | Ti1  | H9B              | 3.356    |
| Cl1  | H9B              | 3.571    | Cl1  | H9C              | 3.589    |
| Cl1  | H11              | 3.269    | Cl1  | H12              | 3.345    |
| Cl2  | H1B              | 3.119    | Cl2  | H13              | 3.117    |
| Cl2  | H13 <sup>1</sup> | 3.033    | Cl2  | H14 <sup>1</sup> | 3.113    |
| O1   | H1A              | 3.211    | O1   | H1B              | 2.485    |
| O1   | H9B              | 2.787    | O1   | H9C              | 2.814    |
| O1   | H10              | 2.946    | O1   | H14              | 3.434    |
| N1   | H1A <sup>1</sup> | 2.016    | N1   | H1A <sup>2</sup> | 2.016    |
| N1   | H1B <sup>1</sup> | 2.016    | N1   | H1B <sup>2</sup> | 2.016    |
| N1   | H7               | 2.580    | N1   | H7 <sup>1</sup>  | 2.580    |
| N1   | H7 <sup>2</sup>  | 2.580    | C1   | H1A <sup>1</sup> | 3.238    |
| C1   | H1A <sup>2</sup> | 2.464    | C1   | H1B <sup>1</sup> | 2.497    |
| C1   | H1B <sup>2</sup> | 2.737    | C1   | H7               | 2.686    |
| C1   | H7 <sup>1</sup>  | 3.268    | C1   | H14 <sup>1</sup> | 3.090    |
| C2   | H1A <sup>2</sup> | 2.664    | C3   | H1A              | 2.978    |
| C3   | H1A <sup>2</sup> | 3.493    | C3   | H1B              | 2.645    |
| C3   | H5               | 3.247    | C3   | H7               | 3.261    |
| C3   | H9A              | 3.315    | C3   | H9B              | 2.775    |
| C3   | H9C              | 2.775    | C3   | H10              | 2.921    |
| C4   | H10              | 3.044    | C5   | H7               | 3.251    |
| C5   | H8A              | 3.312    | C5   | H8B              | 2.770    |
| C5   | H8C              | 2.771    | C5   | H9A              | 2.567    |
| C5   | H9B              | 3.155    | C5   | H9C              | 3.143    |
| C7   | H1A              | 2.954    | C7   | H1A <sup>2</sup> | 3.088    |
| C7   | H1B              | 3.302    | C7   | H5               | 3.252    |
| C7   | H7 <sup>1</sup>  | 3.333    | C7   | H7 <sup>2</sup>  | 3.375    |
| C7   | H8A              | 2.533    | C7   | H8B              | 3.136    |
| C7   | H8C              | 3.116    | C8   | H5               | 2.672    |
| C8   | H7               | 2.639    | C9   | H5               | 2.677    |
| C9   | H10              | 3.290    | C10  | H9B              | 2.980    |
| C10  | H12              | 3.225    | C10  | H13              | 3.231    |
| C11  | H9B              | 3.016    | C11  | H13              | 3.245    |
| C11  | H14              | 3.250    | C12  | H10              | 3.227    |
| C12  | H14              | 3.224    | C13  | H10              | 3.229    |
| C13  | H11              | 3.243    | C14  | H1A <sup>2</sup> | 3.320    |
| C14  | H1B              | 3.439    | C14  | H11              | 3.252    |

Table S7-10. Intramolecular contacts less than 3.60 Å involving hydrogens (continued)

| atom | atom             | distance | atom | atom             | distance |
|------|------------------|----------|------|------------------|----------|
| C14  | H12              | 3.224    | H1A  | H1A <sup>1</sup> | 3.426    |
| H1A  | H1A <sup>2</sup> | 3.426    | H1A  | H1B <sup>1</sup> | 2.495    |
| H1A  | H1B <sup>2</sup> | 3.508    | H1A  | H7               | 3.050    |
| H1A  | H7 <sup>1</sup>  | 3.094    | H1A  | H14 <sup>1</sup> | 2.490    |
| H1B  | H1B <sup>1</sup> | 2.488    | H1B  | H1B <sup>2</sup> | 2.488    |
| H1B  | H7               | 3.567    | H1B  | H14              | 3.070    |
| H1B  | H14 <sup>1</sup> | 2.785    | H5   | H8B              | 2.714    |
| H5   | H8C              | 2.722    | H5   | H9A              | 2.352    |
| H5   | H9B              | 3.344    | H5   | H9C              | 3.331    |
| H7   | H7 <sup>1</sup>  | 2.560    | H7   | H7 <sup>2</sup>  | 2.560    |
| H7   | H8A              | 2.302    | H7   | H8B              | 3.312    |
| H7   | H8C              | 3.292    | H9B  | H10              | 2.652    |
| H9B  | H11              | 2.749    | H10  | H11              | 2.573    |
| H10  | H14              | 2.583    | H11  | H12              | 2.597    |
| H12  | H13              | 2.547    | H13  | H14              | 2.574    |

Symmetry Operators:

(1) -Y+1,X-Y+1,Z

(2) -X+Y,-X+1,Z



Table S7-11. Intermolecular contacts less than 3.60 Å

| atom | atom             | distance  | atom | atom             | distance  |
|------|------------------|-----------|------|------------------|-----------|
| O1   | C9 <sup>1</sup>  | 3.414(11) | C2   | C11 <sup>1</sup> | 3.564(11) |
| C5   | C14 <sup>2</sup> | 3.593(14) | C7   | C11 <sup>1</sup> | 3.558(11) |
| C8   | C12 <sup>2</sup> | 3.573(15) | C8   | C13 <sup>2</sup> | 3.540(14) |
| C9   | O1 <sup>3</sup>  | 3.414(11) | C11  | C2 <sup>3</sup>  | 3.564(11) |
| C11  | C7 <sup>3</sup>  | 3.558(11) | C12  | C8 <sup>2</sup>  | 3.573(15) |
| C13  | C8 <sup>2</sup>  | 3.540(14) | C14  | C5 <sup>2</sup>  | 3.593(14) |

Symmetry Operators:

- (1) Y,-X+Y,-Z+1  
 (2) -X,-Y+1,-Z+1  
 (3) X-Y,X,-Z+1

Table S7-12. Intermolecular contacts less than 3.60 Å involving hydrogens

| atom | atom             | distance | atom | atom             | distance |
|------|------------------|----------|------|------------------|----------|
| Ti1  | H9A <sup>1</sup> | 3.550    | Cl1  | H8A <sup>2</sup> | 3.558    |
| Cl1  | H8B <sup>2</sup> | 3.459    | Cl1  | H9A <sup>1</sup> | 3.087    |
| Cl1  | H12 <sup>3</sup> | 2.829    | Cl2  | H13 <sup>3</sup> | 2.885    |
| O1   | H9A <sup>1</sup> | 2.855    | O1   | H9B <sup>1</sup> | 3.067    |
| C1   | H10 <sup>1</sup> | 3.513    | C1   | H11 <sup>1</sup> | 3.273    |
| C2   | H11 <sup>1</sup> | 2.718    | C3   | H9A <sup>1</sup> | 3.576    |
| C3   | H9B <sup>1</sup> | 3.200    | C3   | H11 <sup>1</sup> | 3.137    |
| C4   | H11 <sup>1</sup> | 3.487    | C5   | H8C <sup>4</sup> | 3.218    |
| C5   | H11 <sup>1</sup> | 3.457    | C5   | H14 <sup>5</sup> | 3.487    |
| C6   | H8C <sup>4</sup> | 3.399    | C6   | H11 <sup>1</sup> | 3.108    |
| C7   | H11 <sup>1</sup> | 2.710    | C8   | H5 <sup>4</sup>  | 3.191    |
| C8   | H8C <sup>4</sup> | 2.911    | C8   | H12 <sup>5</sup> | 3.584    |
| C8   | H13 <sup>5</sup> | 3.524    | C9   | H9C <sup>6</sup> | 3.348    |
| C10  | H1A <sup>6</sup> | 3.028    | C10  | H10 <sup>5</sup> | 2.921    |
| C11  | H1A <sup>6</sup> | 3.143    | C12  | H8A <sup>5</sup> | 3.567    |
| C12  | H8B <sup>5</sup> | 2.971    | C12  | H12 <sup>3</sup> | 3.285    |
| C13  | H8B <sup>5</sup> | 2.781    | C14  | H10 <sup>5</sup> | 3.077    |
| H1A  | C10 <sup>1</sup> | 3.028    | H1A  | C11 <sup>1</sup> | 3.143    |
| H1A  | H9B <sup>1</sup> | 3.591    | H1A  | H10 <sup>1</sup> | 2.572    |
| H1A  | H11 <sup>1</sup> | 2.818    | H5   | C8 <sup>4</sup>  | 3.191    |
| H5   | H8A <sup>4</sup> | 3.553    | H5   | H8B <sup>4</sup> | 2.936    |
| H5   | H8C <sup>4</sup> | 2.649    | H5   | H14 <sup>5</sup> | 3.528    |
| H7   | H11 <sup>1</sup> | 3.049    | H8A  | Cl1 <sup>7</sup> | 3.558    |
| H8A  | C12 <sup>5</sup> | 3.567    | H8A  | H5 <sup>4</sup>  | 3.553    |
| H8A  | H12 <sup>5</sup> | 3.394    | H8B  | Cl1 <sup>7</sup> | 3.459    |
| H8B  | C12 <sup>5</sup> | 2.971    | H8B  | C13 <sup>5</sup> | 2.781    |
| H8B  | H5 <sup>4</sup>  | 2.936    | H8B  | H8B <sup>4</sup> | 3.450    |
| H8B  | H8C <sup>4</sup> | 3.122    | H8B  | H12 <sup>5</sup> | 2.979    |
| H8B  | H13 <sup>5</sup> | 2.619    | H8C  | C5 <sup>4</sup>  | 3.218    |
| H8C  | C6 <sup>4</sup>  | 3.399    | H8C  | C8 <sup>4</sup>  | 2.911    |
| H8C  | H5 <sup>4</sup>  | 2.649    | H8C  | H8B <sup>4</sup> | 3.122    |
| H8C  | H8C <sup>4</sup> | 2.098    | H9A  | Ti1 <sup>6</sup> | 3.550    |
| H9A  | Cl1 <sup>6</sup> | 3.087    | H9A  | O1 <sup>6</sup>  | 2.855    |
| H9A  | C3 <sup>6</sup>  | 3.576    | H9A  | H9C <sup>6</sup> | 2.994    |
| H9B  | O1 <sup>6</sup>  | 3.067    | H9B  | C3 <sup>6</sup>  | 3.200    |
| H9B  | H1A <sup>6</sup> | 3.591    | H9B  | H9C <sup>6</sup> | 3.247    |
| H9C  | C9 <sup>1</sup>  | 3.348    | H9C  | H9A <sup>1</sup> | 2.994    |

Table S7-12. Intermolecular contacts less than 3.60 Å involving hydrogens (continued)

| atom | atom             | distance | atom | atom             | distance |
|------|------------------|----------|------|------------------|----------|
| H9C  | H9B <sup>1</sup> | 3.247    | H9C  | H9C <sup>1</sup> | 3.247    |
| H9C  | H9C <sup>6</sup> | 3.247    | H10  | C1 <sup>6</sup>  | 3.513    |
| H10  | C10 <sup>5</sup> | 2.921    | H10  | C14 <sup>5</sup> | 3.077    |
| H10  | H1A <sup>6</sup> | 2.572    | H10  | H10 <sup>5</sup> | 2.335    |
| H10  | H14 <sup>5</sup> | 2.682    | H11  | C1 <sup>6</sup>  | 3.273    |
| H11  | C2 <sup>6</sup>  | 2.718    | H11  | C3 <sup>6</sup>  | 3.137    |
| H11  | C4 <sup>6</sup>  | 3.487    | H11  | C5 <sup>6</sup>  | 3.457    |
| H11  | C6 <sup>6</sup>  | 3.108    | H11  | C7 <sup>6</sup>  | 2.710    |
| H11  | H1A <sup>6</sup> | 2.818    | H11  | H7 <sup>6</sup>  | 3.049    |
| H12  | C11 <sup>3</sup> | 2.829    | H12  | C8 <sup>5</sup>  | 3.584    |
| H12  | C12 <sup>3</sup> | 3.285    | H12  | H8A <sup>5</sup> | 3.394    |
| H12  | H8B <sup>5</sup> | 2.979    | H12  | H12 <sup>3</sup> | 2.650    |
| H13  | C12 <sup>3</sup> | 2.885    | H13  | C8 <sup>5</sup>  | 3.524    |
| H13  | H8B <sup>5</sup> | 2.619    | H14  | C5 <sup>5</sup>  | 3.487    |
| H14  | H5 <sup>5</sup>  | 3.528    | H14  | H10 <sup>5</sup> | 2.682    |

Symmetry Operators:

- |                         |                           |
|-------------------------|---------------------------|
| (1) Y,-X+Y,-Z+1         | (2) -Y+2/3,-X+1/3,Z+5/6-1 |
| (3) Y,X+1,-Z+1          | (4) X-Y+1,-Y+1,-Z+2       |
| (5) -X,-Y+1,-Z+1        | (6) X-Y,X,-Z+1            |
| (7) -Y+1/3,-X+2/3,Z+1/6 |                           |

X-ray Structure Report

for

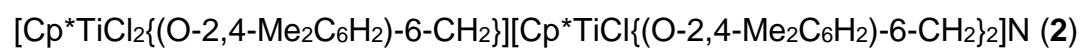

January 19, 2017

## Experimental

### Data Collection

A red platelet crystal of  $C_{47}H_{60}Cl_3NO_3Ti_2$  having approximate dimensions of 0.210 x 0.200 x 0.060 mm was mounted on a glass fiber. All measurements were made on a Rigaku XtaLAB mini diffractometer Mo- $K\alpha$  radiation.

The crystal-to-detector distance was 0.00 mm.

Cell constants and an orientation matrix for data collection corresponded to a primitive monoclinic cell with dimensions:

$$\begin{aligned} a &= 14.275(7) \text{ \AA} \\ b &= 22.520(10) \text{ \AA} & \beta &= 100.408(6)^\circ \\ c &= 14.984(7) \text{ \AA} \\ V &= 4738(4) \text{ \AA}^3 \end{aligned}$$

For  $Z = 4$  and F.W. = 889.15, the calculated density is 1.246 g/cm<sup>3</sup>. The reflection conditions of:

$$\begin{aligned} h0l: & l = 2n \\ 0k0: & k = 2n \end{aligned}$$

uniquely determine the space group to be:

$$P2_1/c \text{ (#14)}$$

The data were collected at a temperature of  $0 \pm 1^\circ\text{C}$  to a maximum  $2\theta$  value of  $55.0^\circ$ . The crystal-to-detector distance was 0.00 mm. Readout was performed in the 0.073 mm pixel mode.

### Data Reduction

Of the 49820 reflections were collected, where 10837 were unique ( $R_{\text{int}} = 0.0801$ ); equivalent reflections were merged. Data were collected and processed using CrystalClear (Rigaku). <sup>1</sup>

The linear absorption coefficient,  $\mu$ , for Mo-K $\alpha$  radiation is 5.443 cm<sup>-1</sup>. An empirical absorption correction was applied which resulted in transmission factors ranging from 0.855 to 0.968. The data were corrected for Lorentz and polarization effects.

### Structure Solution and Refinement

The structure was solved by direct methods<sup>2</sup> and expanded using Fourier techniques. The non-hydrogen atoms were refined anisotropically. Hydrogen atoms were refined using the riding model. The final cycle of full-matrix least-squares refinement<sup>3</sup> on F<sup>2</sup> was based on 10837 observed reflections and 505 variable parameters and converged (largest parameter shift was 0.00 times its esd) with unweighted and weighted agreement factors of:

$$R1 = \Sigma ||F_o| - |F_c|| / \Sigma |F_o| = 0.0721$$

$$wR2 = [ \Sigma ( w (F_o^2 - F_c^2)^2 ) / \Sigma w(F_o^2)^2 ]^{1/2} = 0.2152$$

The goodness of fit<sup>4</sup> was 1.06. Unit weights were used. The maximum and minimum peaks on the final difference Fourier map corresponded to 0.59 and -0.75 e<sup>-</sup>/Å<sup>3</sup>, respectively.

Neutral atom scattering factors were taken from International Tables for Crystallography (IT), Vol. C, Table 6.1.1.4<sup>5</sup>. Anomalous dispersion effects were included in F<sub>calc</sub><sup>6</sup>; the values for  $\Delta f'$  and  $\Delta f''$  were those of Creagh and McAuley<sup>7</sup>. The values for the mass attenuation coefficients are those of Creagh and Hubbell<sup>8</sup>. All calculations were performed using the CrystalStructure<sup>9</sup> crystallographic software package except for refinement, which was performed using SHELXL Version 2014/7<sup>10</sup>.

## References

(1) CrystalClear: Data Collection and Processing Software, Rigaku Corporation (1998-2015). Tokyo 196-8666, Japan.

(2) SHELXT: Sheldrick, G. M. (2014). Acta Cryst. A70, C1437.

(3) Least Squares function minimized: (SHELXL Version 2014/7)

$$\sum w(F_o^2 - F_c^2)^2 \quad \text{where } w = \text{Least Squares weights.}$$

(4) Goodness of fit is defined as:

$$[\sum w(F_o^2 - F_c^2)^2 / (N_o - N_v)]^{1/2}$$

where:  $N_o$  = number of observations  
 $N_v$  = number of variables

(5) International Tables for Crystallography, Vol.C (1992). Ed. A.J.C. Wilson, Kluwer Academic Publishers, Dordrecht, Netherlands, Table 6.1.1.4, pp. 572.

(6) Ibers, J. A. & Hamilton, W. C.; Acta Crystallogr., 17, 781 (1964).

(7) Creagh, D. C. & McAuley, W.J. ; "International Tables for Crystallography", Vol C, (A.J.C. Wilson, ed.), Kluwer Academic Publishers, Boston, Table 4.2.6.8, pages 219-222 (1992).

(8) Creagh, D. C. & Hubbell, J.H.; "International Tables for Crystallography", Vol C, (A.J.C. Wilson, ed.), Kluwer Academic Publishers, Boston, Table 4.2.4.3, pages 200-206 (1992).

(9) CrystalStructure 4.2: Crystal Structure Analysis Package, Rigaku Corporation (2000-2015). Tokyo 196-8666, Japan.

(10) SHELXL Version 2014/7: Sheldrick, G. M. (2008). Acta Cryst. A64, 112-122.

## EXPERIMENTAL DETAILS

### A. Crystal Data

|                         |                                                                                                                                                         |
|-------------------------|---------------------------------------------------------------------------------------------------------------------------------------------------------|
| Empirical Formula       | $C_{47}H_{60}Cl_3NO_3Ti_2$                                                                                                                              |
| Formula Weight          | 889.15                                                                                                                                                  |
| Crystal Color, Habit    | red, platelet                                                                                                                                           |
| Crystal Dimensions      | 0.210 X 0.200 X 0.060 mm                                                                                                                                |
| Crystal System          | monoclinic                                                                                                                                              |
| Lattice Type            | Primitive                                                                                                                                               |
| Lattice Parameters      | $a = 14.275(7) \text{ \AA}$<br>$b = 22.520(10) \text{ \AA}$<br>$c = 14.984(7) \text{ \AA}$<br>$\beta = 100.408(6)^\circ$<br>$V = 4738(4) \text{ \AA}^3$ |
| Space Group             | $P2_1/c$ (#14)                                                                                                                                          |
| Z value                 | 4                                                                                                                                                       |
| $D_{\text{calc}}$       | $1.246 \text{ g/cm}^3$                                                                                                                                  |
| $F_{000}$               | 1872.00                                                                                                                                                 |
| $\mu(\text{MoK}\alpha)$ | $5.443 \text{ cm}^{-1}$                                                                                                                                 |



## B. Intensity Measurements

|                             |                                                                       |
|-----------------------------|-----------------------------------------------------------------------|
| Diffractometer              | XtaLAB mini                                                           |
| Radiation                   | MoK $\alpha$ ( $\lambda = 0.71075 \text{ \AA}$ )                      |
| Voltage, Current            | 50kV, 12mA                                                            |
| Temperature                 | 0.0°C                                                                 |
| Detector Aperture           | 75.0 mm (diameter)                                                    |
| Detector Position           | 0.00 mm                                                               |
| Pixel Size                  | 0.073 mm                                                              |
| $2\theta_{\max}$            | 55.0°                                                                 |
| No. of Reflections Measured | Total: 49820<br>Unique: 10837 ( $R_{\text{int}} = 0.0801$ )           |
| Corrections                 | Lorentz-polarization<br>Absorption<br>(trans. factors: 0.855 - 0.968) |

### C. Structure Solution and Refinement

|                                       |                                                                                                                      |
|---------------------------------------|----------------------------------------------------------------------------------------------------------------------|
| Structure Solution                    | Direct Methods (SHELXT)                                                                                              |
| Refinement                            | Full-matrix least-squares on $F^2$                                                                                   |
| Function Minimized                    | $\sum w (F_o^2 - F_c^2)^2$                                                                                           |
| Least Squares Weights                 | $w = 1 / [ \sigma^2(F_o^2) + (0.1005 \cdot P)^2 + 9.5208 \cdot P ]$<br>where $P = (\text{Max}(F_o^2, 0) + 2F_c^2)/3$ |
| $2\theta_{\text{max}}$ cutoff         | 55.0°                                                                                                                |
| Anomalous Dispersion                  | All non-hydrogen atoms                                                                                               |
| No. Observations (All reflections)    | 10837                                                                                                                |
| No. Variables                         | 505                                                                                                                  |
| Reflection/Parameter Ratio            | 21.46                                                                                                                |
| Residuals: R1 ( $I > 2.00\sigma(I)$ ) | 0.0721                                                                                                               |
| Residuals: R (All reflections)        | 0.0999                                                                                                               |
| Residuals: wR2 (All reflections)      | 0.2152                                                                                                               |
| Goodness of Fit Indicator             | 1.063                                                                                                                |
| Max Shift/Error in Final Cycle        | 0.000                                                                                                                |
| Maximum peak in Final Diff. Map       | 0.59 e <sup>-</sup> /Å <sup>3</sup>                                                                                  |
| Minimum peak in Final Diff. Map       | -0.75 e <sup>-</sup> /Å <sup>3</sup>                                                                                 |

Table S8-1. Atomic coordinates and  $B_{\text{iso}}/B_{\text{eq}}$ 

| atom | x           | y           | z           | $B_{\text{eq}}$ |
|------|-------------|-------------|-------------|-----------------|
| Ti1  | 0.19676(5)  | 0.41835(3)  | 0.27932(5)  | 1.536(13)       |
| Ti2  | 0.67383(5)  | 0.19234(3)  | 0.47634(5)  | 1.369(13)       |
| Cl1  | 0.24355(8)  | 0.42275(5)  | 0.43314(7)  | 2.52(2)         |
| Cl2  | 0.03828(7)  | 0.39755(5)  | 0.26192(8)  | 2.52(2)         |
| Cl3  | 0.71146(8)  | 0.13254(4)  | 0.36228(7)  | 2.099(18)       |
| O1   | 0.24535(19) | 0.34962(12) | 0.25154(19) | 1.71(5)         |
| O2   | 0.54687(19) | 0.18091(12) | 0.46136(19) | 1.64(5)         |
| O3   | 0.69464(19) | 0.26492(12) | 0.43244(19) | 1.66(5)         |
| N1   | 0.4955(2)   | 0.30782(14) | 0.4182(2)   | 1.33(5)         |
| C1   | 0.4414(3)   | 0.33554(17) | 0.3368(3)   | 1.53(6)         |
| C2   | 0.3885(3)   | 0.29182(17) | 0.2705(3)   | 1.52(6)         |
| C3   | 0.2934(3)   | 0.30091(17) | 0.2295(3)   | 1.64(6)         |
| C4   | 0.2436(3)   | 0.25963(18) | 0.1680(3)   | 1.92(7)         |
| C5   | 0.2905(3)   | 0.20765(18) | 0.1514(3)   | 1.89(7)         |
| C6   | 0.3837(3)   | 0.19640(18) | 0.1919(3)   | 1.83(7)         |
| C7   | 0.4321(3)   | 0.23899(17) | 0.2498(3)   | 1.56(6)         |
| C8   | 0.4320(3)   | 0.13797(18) | 0.1778(3)   | 2.06(7)         |
| C9   | 0.1421(3)   | 0.2722(2)   | 0.1226(4)   | 3.02(9)         |
| C10  | 0.2818(3)   | 0.46502(19) | 0.1793(3)   | 2.09(7)         |
| C11  | 0.3036(3)   | 0.49610(19) | 0.2617(3)   | 2.19(7)         |
| C12  | 0.2186(4)   | 0.52408(19) | 0.2779(3)   | 2.42(8)         |
| C13  | 0.1448(3)   | 0.5100(2)   | 0.2052(3)   | 2.36(8)         |
| C14  | 0.1834(3)   | 0.47247(19) | 0.1446(3)   | 2.12(7)         |
| C15  | 0.3514(3)   | 0.4313(2)   | 0.1342(4)   | 2.78(9)         |
| C16  | 0.4004(4)   | 0.5036(2)   | 0.3202(4)   | 3.33(10)        |
| C17  | 0.2111(5)   | 0.5650(2)   | 0.3546(4)   | 3.83(11)        |
| C18  | 0.0456(4)   | 0.5336(3)   | 0.1902(4)   | 3.92(12)        |
| C19  | 0.1307(4)   | 0.4476(2)   | 0.0567(3)   | 3.02(9)         |
| C20  | 0.4332(3)   | 0.28297(17) | 0.4770(3)   | 1.66(6)         |
| C21  | 0.3910(3)   | 0.22278(18) | 0.4458(3)   | 1.58(6)         |
| C22  | 0.4502(3)   | 0.17394(18) | 0.4406(3)   | 1.55(6)         |
| C23  | 0.4126(3)   | 0.11809(18) | 0.4124(3)   | 1.79(6)         |
| C24  | 0.3141(3)   | 0.1134(2)   | 0.3862(3)   | 2.07(7)         |
| C25  | 0.2537(3)   | 0.1613(2)   | 0.3893(3)   | 2.08(7)         |
| C26  | 0.2929(3)   | 0.2152(2)   | 0.4204(3)   | 2.03(7)         |
| C27  | 0.1467(3)   | 0.1555(2)   | 0.3552(4)   | 2.73(8)         |
| C28  | 0.4776(3)   | 0.06593(19) | 0.4077(3)   | 2.39(8)         |

Table S8-1. Atomic coordinates and  $B_{\text{iso}}/B_{\text{eq}}$  (continued)

| atom | x         | y           | z         | $B_{\text{eq}}$ |
|------|-----------|-------------|-----------|-----------------|
| C29  | 0.5621(3) | 0.35097(18) | 0.4693(3) | 1.61(6)         |
| C30  | 0.6449(3) | 0.36604(17) | 0.4223(3) | 1.42(6)         |
| C31  | 0.7089(3) | 0.32158(17) | 0.4080(3) | 1.43(6)         |
| C32  | 0.7876(3) | 0.33477(18) | 0.3669(3) | 1.71(6)         |
| C33  | 0.7987(3) | 0.39379(19) | 0.3406(3) | 1.96(7)         |
| C34  | 0.7374(3) | 0.43878(18) | 0.3551(3) | 1.71(6)         |
| C35  | 0.6605(3) | 0.42415(17) | 0.3969(3) | 1.56(6)         |
| C36  | 0.7527(3) | 0.5018(2)   | 0.3262(3) | 2.44(8)         |
| C37  | 0.8590(3) | 0.28784(19) | 0.3531(3) | 2.16(7)         |
| C38  | 0.7991(3) | 0.21574(19) | 0.6006(3) | 1.68(6)         |
| C39  | 0.8202(3) | 0.15916(18) | 0.5670(3) | 1.70(6)         |
| C40  | 0.7457(3) | 0.11879(19) | 0.5816(3) | 1.90(7)         |
| C41  | 0.6803(3) | 0.15070(18) | 0.6227(3) | 1.67(6)         |
| C42  | 0.7108(3) | 0.21030(18) | 0.6320(3) | 1.81(6)         |
| C43  | 0.6627(3) | 0.2585(2)   | 0.6775(3) | 2.19(7)         |
| C44  | 0.8584(3) | 0.2708(2)   | 0.6039(3) | 2.45(8)         |
| C45  | 0.9061(3) | 0.1434(2)   | 0.5283(3) | 2.74(8)         |
| C46  | 0.7442(4) | 0.05342(19) | 0.5614(3) | 2.71(8)         |
| C47  | 0.5929(3) | 0.1268(2)   | 0.6521(3) | 2.33(8)         |

$$B_{\text{eq}} = 8/3 \pi^2 (U_{11}(aa^*)^2 + U_{22}(bb^*)^2 + U_{33}(cc^*)^2 + 2U_{12}(aa^*bb^*)\cos \gamma + 2U_{13}(aa^*cc^*)\cos \beta + 2U_{23}(bb^*cc^*)\cos \alpha)$$

Table S8-2. Atomic coordinates and  $B_{\text{iso}}$  involving hydrogen atoms

| atom | x       | y       | z       | $B_{\text{iso}}$ |
|------|---------|---------|---------|------------------|
| H1A  | 0.48476 | 0.35803 | 0.30687 | 1.841            |
| H1B  | 0.39608 | 0.36325 | 0.35457 | 1.841            |
| H5   | 0.25802 | 0.17961 | 0.11191 | 2.267            |
| H7   | 0.49550 | 0.23225 | 0.27560 | 1.867            |
| H8A  | 0.49616 | 0.13842 | 0.21107 | 2.475            |
| H8B  | 0.39758 | 0.10590 | 0.19908 | 2.475            |
| H8C  | 0.43291 | 0.13263 | 0.11441 | 2.475            |
| H9A  | 0.12262 | 0.31003 | 0.14261 | 3.619            |
| H9B  | 0.13814 | 0.27296 | 0.05793 | 3.619            |
| H9C  | 0.10098 | 0.24173 | 0.13832 | 3.619            |
| H15A | 0.31848 | 0.41410 | 0.07872 | 3.335            |
| H15B | 0.39972 | 0.45792 | 0.12122 | 3.335            |
| H15C | 0.38041 | 0.40040 | 0.17396 | 3.335            |
| H16A | 0.39474 | 0.52686 | 0.37262 | 3.994            |
| H16B | 0.42613 | 0.46528 | 0.33910 | 3.994            |
| H16C | 0.44200 | 0.52336 | 0.28611 | 3.994            |
| H17A | 0.27139 | 0.56693 | 0.39503 | 4.595            |
| H17B | 0.19358 | 0.60391 | 0.33123 | 4.595            |
| H17C | 0.16347 | 0.55048 | 0.38688 | 4.595            |
| H18A | 0.00981 | 0.51687 | 0.13562 | 4.708            |
| H18B | 0.01614 | 0.52316 | 0.24074 | 4.708            |
| H18C | 0.04714 | 0.57606 | 0.18457 | 4.708            |
| H19A | 0.06487 | 0.45893 | 0.04880 | 3.623            |
| H19B | 0.15796 | 0.46284 | 0.00735 | 3.623            |
| H19C | 0.13550 | 0.40506 | 0.05791 | 3.623            |
| H20A | 0.38167 | 0.31064 | 0.47937 | 1.994            |
| H20B | 0.46952 | 0.27903 | 0.53802 | 1.994            |
| H24  | 0.28806 | 0.07690 | 0.36598 | 2.490            |
| H26  | 0.25282 | 0.24720 | 0.42455 | 2.437            |
| H27A | 0.13184 | 0.11538 | 0.33632 | 3.279            |
| H27B | 0.11322 | 0.16577 | 0.40316 | 3.279            |
| H27C | 0.12780 | 0.18185 | 0.30479 | 3.279            |
| H28A | 0.54242 | 0.07781 | 0.42842 | 2.864            |
| H28B | 0.46154 | 0.03448 | 0.44548 | 2.864            |
| H28C | 0.47012 | 0.05224 | 0.34612 | 2.864            |
| H29A | 0.58691 | 0.33484 | 0.52893 | 1.937            |
| H29B | 0.52771 | 0.38711 | 0.47760 | 1.937            |

Table S8-2. Atomic coordinates and  $B_{\text{iso}}$  involving hydrogens/ $B_{\text{eq}}$  (continued)

| atom | x       | y       | z       | $B_{\text{eq}}$ |
|------|---------|---------|---------|-----------------|
| H33  | 0.84957 | 0.40302 | 0.31214 | 2.357           |
| H35  | 0.61892 | 0.45389 | 0.40802 | 1.870           |
| H36A | 0.70364 | 0.52687 | 0.34155 | 2.929           |
| H36B | 0.81376 | 0.51563 | 0.35677 | 2.929           |
| H36C | 0.75057 | 0.50293 | 0.26178 | 2.929           |
| H37A | 0.84024 | 0.25036 | 0.37486 | 2.588           |
| H37B | 0.86143 | 0.28471 | 0.28970 | 2.588           |
| H37C | 0.92070 | 0.29859 | 0.38608 | 2.588           |
| H43A | 0.69653 | 0.29524 | 0.67542 | 2.632           |
| H43B | 0.59824 | 0.26322 | 0.64632 | 2.632           |
| H43C | 0.66297 | 0.24783 | 0.73951 | 2.632           |
| H44A | 0.82746 | 0.30260 | 0.62986 | 2.940           |
| H44B | 0.91984 | 0.26367 | 0.64042 | 2.940           |
| H44C | 0.86583 | 0.28139 | 0.54352 | 2.940           |
| H45A | 0.90281 | 0.10238 | 0.51069 | 3.293           |
| H45B | 0.90845 | 0.16777 | 0.47617 | 3.293           |
| H45C | 0.96225 | 0.14999 | 0.57313 | 3.293           |
| H46A | 0.79737 | 0.04351 | 0.53312 | 3.253           |
| H46B | 0.74828 | 0.03147 | 0.61689 | 3.253           |
| H46C | 0.68599 | 0.04350 | 0.52124 | 3.253           |
| H47A | 0.56122 | 0.15827 | 0.67813 | 2.797           |
| H47B | 0.55078 | 0.11068 | 0.60061 | 2.797           |
| H47C | 0.61061 | 0.09619 | 0.69651 | 2.797           |

Table S8-3. Anisotropic displacement parameters

| atom | U <sub>11</sub> | U <sub>22</sub> | U <sub>33</sub> | U <sub>12</sub> | U <sub>13</sub> | U <sub>23</sub> |
|------|-----------------|-----------------|-----------------|-----------------|-----------------|-----------------|
| Ti1  | 0.0179(4)       | 0.0200(4)       | 0.0212(4)       | 0.0006(3)       | 0.0056(3)       | 0.0003(3)       |
| Ti2  | 0.0180(3)       | 0.0162(3)       | 0.0182(3)       | 0.0005(3)       | 0.0044(3)       | 0.0006(3)       |
| Cl1  | 0.0386(6)       | 0.0360(6)       | 0.0216(5)       | 0.0048(5)       | 0.0061(4)       | -0.0010(4)      |
| Cl2  | 0.0190(5)       | 0.0389(6)       | 0.0396(6)       | -0.0020(4)      | 0.0098(4)       | 0.0006(5)       |
| Cl3  | 0.0353(6)       | 0.0228(5)       | 0.0233(5)       | 0.0029(4)       | 0.0099(4)       | -0.0025(4)      |
| O1   | 0.0186(14)      | 0.0216(14)      | 0.0248(14)      | 0.0011(11)      | 0.0043(11)      | 0.0016(11)      |
| O2   | 0.0175(13)      | 0.0197(14)      | 0.0242(14)      | -0.0006(11)     | 0.0012(11)      | 0.0030(11)      |
| O3   | 0.0186(14)      | 0.0198(14)      | 0.0260(14)      | 0.0019(11)      | 0.0067(11)      | 0.0037(11)      |
| N1   | 0.0172(15)      | 0.0185(16)      | 0.0151(15)      | -0.0024(12)     | 0.0035(12)      | 0.0016(12)      |
| C1   | 0.0168(18)      | 0.0196(19)      | 0.0214(19)      | -0.0020(14)     | 0.0020(15)      | 0.0014(15)      |
| C2   | 0.0197(19)      | 0.0186(18)      | 0.0208(19)      | 0.0004(14)      | 0.0073(15)      | 0.0046(15)      |
| C3   | 0.024(2)        | 0.0171(18)      | 0.0212(19)      | 0.0020(15)      | 0.0051(16)      | 0.0025(15)      |
| C4   | 0.025(2)        | 0.024(2)        | 0.023(2)        | -0.0022(16)     | 0.0016(16)      | 0.0005(16)      |
| C5   | 0.026(2)        | 0.020(2)        | 0.026(2)        | -0.0029(16)     | 0.0066(17)      | -0.0028(16)     |
| C6   | 0.030(2)        | 0.0182(19)      | 0.023(2)        | 0.0002(16)      | 0.0104(17)      | 0.0014(15)      |
| C7   | 0.0193(19)      | 0.023(2)        | 0.0183(18)      | 0.0010(15)      | 0.0067(14)      | 0.0032(15)      |
| C8   | 0.038(2)        | 0.018(2)        | 0.024(2)        | 0.0024(17)      | 0.0097(18)      | 0.0002(16)      |
| C9   | 0.025(2)        | 0.039(3)        | 0.044(3)        | 0.002(2)        | -0.010(2)       | -0.008(2)       |
| C10  | 0.026(2)        | 0.024(2)        | 0.032(2)        | -0.0009(17)     | 0.0116(18)      | 0.0056(17)      |
| C11  | 0.023(2)        | 0.023(2)        | 0.036(2)        | -0.0011(17)     | 0.0018(18)      | 0.0047(18)      |
| C12  | 0.039(3)        | 0.021(2)        | 0.033(2)        | -0.0012(18)     | 0.008(2)        | -0.0004(18)     |
| C13  | 0.027(2)        | 0.027(2)        | 0.038(3)        | 0.0074(17)      | 0.0109(19)      | 0.0092(19)      |
| C14  | 0.027(2)        | 0.026(2)        | 0.028(2)        | -0.0001(17)     | 0.0068(17)      | 0.0061(17)      |
| C15  | 0.034(3)        | 0.036(3)        | 0.042(3)        | 0.006(2)        | 0.025(2)        | 0.011(2)        |
| C16  | 0.033(3)        | 0.040(3)        | 0.046(3)        | -0.016(2)       | -0.010(2)       | 0.013(2)        |
| C17  | 0.080(4)        | 0.029(3)        | 0.037(3)        | 0.005(3)        | 0.013(3)        | -0.008(2)       |
| C18  | 0.040(3)        | 0.051(3)        | 0.062(4)        | 0.028(3)        | 0.018(3)        | 0.026(3)        |
| C19  | 0.043(3)        | 0.047(3)        | 0.022(2)        | -0.018(2)       | 0.001(2)        | 0.006(2)        |
| C20  | 0.0171(18)      | 0.0205(19)      | 0.027(2)        | 0.0001(15)      | 0.0090(15)      | -0.0013(16)     |
| C21  | 0.0209(19)      | 0.024(2)        | 0.0171(18)      | -0.0013(15)     | 0.0080(15)      | 0.0057(15)      |
| C22  | 0.0170(18)      | 0.027(2)        | 0.0151(18)      | -0.0018(15)     | 0.0025(14)      | 0.0014(15)      |
| C23  | 0.027(2)        | 0.022(2)        | 0.0196(19)      | -0.0035(16)     | 0.0051(16)      | 0.0049(15)      |
| C24  | 0.030(2)        | 0.027(2)        | 0.022(2)        | -0.0094(17)     | 0.0040(17)      | 0.0010(16)      |
| C25  | 0.022(2)        | 0.031(2)        | 0.026(2)        | -0.0085(17)     | 0.0040(17)      | 0.0053(17)      |
| C26  | 0.023(2)        | 0.029(2)        | 0.028(2)        | -0.0044(17)     | 0.0097(17)      | 0.0017(17)      |
| C27  | 0.023(2)        | 0.036(3)        | 0.043(3)        | -0.0087(19)     | 0.0018(19)      | 0.004(2)        |
| C28  | 0.037(3)        | 0.020(2)        | 0.032(2)        | -0.0035(18)     | 0.0036(19)      | 0.0020(17)      |

Table S8-3. Anisotropic displacement parameters (continued)

| atom | U <sub>11</sub> | U <sub>22</sub> | U <sub>33</sub> | U <sub>12</sub> | U <sub>13</sub> | U <sub>23</sub> |
|------|-----------------|-----------------|-----------------|-----------------|-----------------|-----------------|
| C29  | 0.0183(18)      | 0.0211(19)      | 0.0220(19)      | -0.0024(15)     | 0.0040(15)      | -0.0033(15)     |
| C30  | 0.0150(17)      | 0.0216(19)      | 0.0164(17)      | -0.0034(14)     | 0.0001(14)      | -0.0051(14)     |
| C31  | 0.0195(19)      | 0.0180(18)      | 0.0168(18)      | -0.0022(14)     | 0.0034(14)      | -0.0014(14)     |
| C32  | 0.0168(18)      | 0.026(2)        | 0.0217(19)      | -0.0013(15)     | 0.0036(15)      | 0.0022(16)      |
| C33  | 0.020(2)        | 0.031(2)        | 0.024(2)        | -0.0031(16)     | 0.0079(16)      | 0.0051(17)      |
| C34  | 0.0202(19)      | 0.0199(19)      | 0.024(2)        | -0.0027(15)     | 0.0028(16)      | 0.0012(15)      |
| C35  | 0.0182(19)      | 0.0205(19)      | 0.0188(18)      | 0.0000(15)      | -0.0014(14)     | -0.0029(15)     |
| C36  | 0.033(2)        | 0.025(2)        | 0.035(2)        | -0.0043(18)     | 0.0067(19)      | 0.0075(18)      |
| C37  | 0.020(2)        | 0.026(2)        | 0.037(2)        | -0.0006(17)     | 0.0097(18)      | 0.0019(18)      |
| C38  | 0.0174(18)      | 0.028(2)        | 0.0176(18)      | -0.0010(15)     | -0.0005(14)     | 0.0004(16)      |
| C39  | 0.0198(19)      | 0.023(2)        | 0.0220(19)      | 0.0043(15)      | 0.0034(15)      | 0.0013(15)      |
| C40  | 0.023(2)        | 0.025(2)        | 0.022(2)        | 0.0027(16)      | -0.0008(16)     | 0.0026(16)      |
| C41  | 0.023(2)        | 0.026(2)        | 0.0138(17)      | 0.0005(16)      | 0.0004(14)      | 0.0031(15)      |
| C42  | 0.024(2)        | 0.024(2)        | 0.021(2)        | 0.0030(16)      | 0.0060(16)      | 0.0012(16)      |
| C43  | 0.028(2)        | 0.032(2)        | 0.023(2)        | 0.0082(18)      | 0.0033(17)      | -0.0046(17)     |
| C44  | 0.028(2)        | 0.031(2)        | 0.033(2)        | -0.0050(18)     | 0.0015(18)      | -0.0030(19)     |
| C45  | 0.021(2)        | 0.044(3)        | 0.039(3)        | 0.0126(19)      | 0.0038(19)      | -0.000(2)       |
| C46  | 0.048(3)        | 0.021(2)        | 0.035(2)        | 0.003(2)        | 0.009(2)        | 0.0028(18)      |
| C47  | 0.033(2)        | 0.030(2)        | 0.027(2)        | -0.0053(18)     | 0.0094(18)      | 0.0023(18)      |

The general temperature factor expression:  $\exp(-2\pi^2(a^2U_{11}h^2 + b^2U_{22}k^2 + c^2U_{33}l^2 + 2a*b*U_{12}hk + 2a*c*U_{13}hl + 2b*c*U_{23}kl))$



Table S8-4. Bond lengths (Å)

| atom | atom | distance   | atom | atom | distance   |
|------|------|------------|------|------|------------|
| Ti1  | Cl1  | 2.2830(16) | Ti1  | Cl2  | 2.2787(16) |
| Ti1  | O1   | 1.776(3)   | Ti1  | C10  | 2.341(5)   |
| Ti1  | C11  | 2.368(5)   | Ti1  | C12  | 2.402(4)   |
| Ti1  | C13  | 2.396(5)   | Ti1  | C14  | 2.336(5)   |
| Ti2  | Cl3  | 2.3140(15) | Ti2  | O2   | 1.804(3)   |
| Ti2  | O3   | 1.806(3)   | Ti2  | C38  | 2.396(4)   |
| Ti2  | C39  | 2.396(4)   | Ti2  | C40  | 2.387(4)   |
| Ti2  | C41  | 2.371(4)   | Ti2  | C42  | 2.332(4)   |
| O1   | C3   | 1.365(5)   | O2   | C22  | 1.368(5)   |
| O3   | C31  | 1.353(5)   | N1   | C1   | 1.461(5)   |
| N1   | C20  | 1.471(5)   | N1   | C29  | 1.474(5)   |
| C1   | C2   | 1.502(5)   | C2   | C3   | 1.401(5)   |
| C2   | C7   | 1.403(6)   | C3   | C4   | 1.408(5)   |
| C4   | C5   | 1.393(6)   | C4   | C9   | 1.513(6)   |
| C5   | C6   | 1.383(6)   | C6   | C7   | 1.390(5)   |
| C6   | C8   | 1.518(6)   | C10  | C11  | 1.404(6)   |
| C10  | C14  | 1.417(6)   | C10  | C15  | 1.504(7)   |
| C11  | C12  | 1.427(7)   | C11  | C16  | 1.506(6)   |
| C12  | C13  | 1.408(6)   | C12  | C17  | 1.491(7)   |
| C13  | C14  | 1.422(7)   | C13  | C18  | 1.491(7)   |
| C14  | C19  | 1.502(6)   | C20  | C21  | 1.522(6)   |
| C21  | C22  | 1.398(6)   | C21  | C26  | 1.394(6)   |
| C22  | C23  | 1.402(6)   | C23  | C24  | 1.393(6)   |
| C23  | C28  | 1.506(6)   | C24  | C25  | 1.387(6)   |
| C25  | C26  | 1.382(6)   | C25  | C27  | 1.525(6)   |
| C29  | C30  | 1.519(6)   | C30  | C31  | 1.399(6)   |
| C30  | C35  | 1.392(5)   | C31  | C32  | 1.406(6)   |
| C32  | C33  | 1.403(6)   | C32  | C37  | 1.508(6)   |
| C33  | C34  | 1.381(6)   | C34  | C35  | 1.398(6)   |
| C34  | C36  | 1.511(6)   | C38  | C39  | 1.422(6)   |
| C38  | C42  | 1.429(6)   | C38  | C44  | 1.496(6)   |
| C39  | C40  | 1.445(6)   | C39  | C45  | 1.491(7)   |
| C40  | C41  | 1.405(6)   | C40  | C46  | 1.502(6)   |
| C41  | C42  | 1.410(6)   | C41  | C47  | 1.496(6)   |
| C42  | C43  | 1.511(6)   |      |      |            |

Table S8-5. Bond lengths involving hydrogens (Å)

| atom | atom | distance | atom | atom | distance |
|------|------|----------|------|------|----------|
| C1   | H1A  | 0.970    | C1   | H1B  | 0.970    |
| C5   | H5   | 0.930    | C7   | H7   | 0.930    |
| C8   | H8A  | 0.960    | C8   | H8B  | 0.960    |
| C8   | H8C  | 0.960    | C9   | H9A  | 0.960    |
| C9   | H9B  | 0.960    | C9   | H9C  | 0.960    |
| C15  | H15A | 0.960    | C15  | H15B | 0.960    |
| C15  | H15C | 0.960    | C16  | H16A | 0.960    |
| C16  | H16B | 0.960    | C16  | H16C | 0.960    |
| C17  | H17A | 0.960    | C17  | H17B | 0.960    |
| C17  | H17C | 0.960    | C18  | H18A | 0.960    |
| C18  | H18B | 0.960    | C18  | H18C | 0.960    |
| C19  | H19A | 0.960    | C19  | H19B | 0.960    |
| C19  | H19C | 0.960    | C20  | H20A | 0.970    |
| C20  | H20B | 0.970    | C24  | H24  | 0.930    |
| C26  | H26  | 0.930    | C27  | H27A | 0.960    |
| C27  | H27B | 0.960    | C27  | H27C | 0.960    |
| C28  | H28A | 0.960    | C28  | H28B | 0.960    |
| C28  | H28C | 0.960    | C29  | H29A | 0.970    |
| C29  | H29B | 0.970    | C33  | H33  | 0.930    |
| C35  | H35  | 0.930    | C36  | H36A | 0.960    |
| C36  | H36B | 0.960    | C36  | H36C | 0.960    |
| C37  | H37A | 0.960    | C37  | H37B | 0.960    |
| C37  | H37C | 0.960    | C43  | H43A | 0.960    |
| C43  | H43B | 0.960    | C43  | H43C | 0.960    |
| C44  | H44A | 0.960    | C44  | H44B | 0.960    |
| C44  | H44C | 0.960    | C45  | H45A | 0.960    |
| C45  | H45B | 0.960    | C45  | H45C | 0.960    |
| C46  | H46A | 0.960    | C46  | H46B | 0.960    |
| C46  | H46C | 0.960    | C47  | H47A | 0.960    |
| C47  | H47B | 0.960    | C47  | H47C | 0.960    |

Table S8-6. Bond angles ( $^{\circ}$ )

| atom | atom | atom | angle      | atom | atom | atom | angle      |
|------|------|------|------------|------|------|------|------------|
| Cl1  | Ti1  | Cl2  | 103.17(5)  | Cl1  | Ti1  | O1   | 102.65(10) |
| Cl1  | Ti1  | C10  | 122.39(11) | Cl1  | Ti1  | C11  | 90.20(12)  |
| Cl1  | Ti1  | C12  | 87.19(12)  | Cl1  | Ti1  | C13  | 116.11(12) |
| Cl1  | Ti1  | C14  | 144.39(11) | Cl2  | Ti1  | O1   | 102.46(10) |
| Cl2  | Ti1  | C10  | 129.64(11) | Cl2  | Ti1  | C11  | 141.76(11) |
| Cl2  | Ti1  | C12  | 109.29(12) | Cl2  | Ti1  | C13  | 84.62(12)  |
| Cl2  | Ti1  | C14  | 94.81(11)  | O1   | Ti1  | C10  | 88.37(15)  |
| O1   | Ti1  | C11  | 109.36(15) | O1   | Ti1  | C12  | 143.63(16) |
| O1   | Ti1  | C13  | 137.98(16) | O1   | Ti1  | C14  | 103.10(15) |
| C10  | Ti1  | C11  | 34.70(16)  | C10  | Ti1  | C12  | 57.75(17)  |
| C10  | Ti1  | C13  | 57.97(16)  | C10  | Ti1  | C14  | 35.28(15)  |
| C11  | Ti1  | C12  | 34.81(16)  | C11  | Ti1  | C13  | 57.55(15)  |
| C11  | Ti1  | C14  | 58.11(15)  | C12  | Ti1  | C13  | 34.13(15)  |
| C12  | Ti1  | C14  | 57.71(16)  | C13  | Ti1  | C14  | 34.94(16)  |
| Cl3  | Ti2  | O2   | 100.78(10) | Cl3  | Ti2  | O3   | 100.50(11) |
| Cl3  | Ti2  | C38  | 117.49(11) | Cl3  | Ti2  | C39  | 86.69(11)  |
| Cl3  | Ti2  | C40  | 87.41(11)  | Cl3  | Ti2  | C41  | 118.52(11) |
| Cl3  | Ti2  | C42  | 143.03(11) | O2   | Ti2  | O3   | 108.14(12) |
| O2   | Ti2  | C38  | 136.08(14) | O2   | Ti2  | C39  | 141.20(14) |
| O2   | Ti2  | C40  | 106.57(14) | O2   | Ti2  | C41  | 85.92(13)  |
| O2   | Ti2  | C42  | 100.94(14) | O3   | Ti2  | C38  | 86.28(13)  |
| O3   | Ti2  | C39  | 107.74(13) | O3   | Ti2  | C40  | 142.11(13) |
| O3   | Ti2  | C41  | 135.49(13) | O3   | Ti2  | C42  | 100.66(14) |
| C38  | Ti2  | C39  | 34.52(14)  | C38  | Ti2  | C40  | 57.85(14)  |
| C38  | Ti2  | C41  | 57.97(14)  | C38  | Ti2  | C42  | 35.16(15)  |
| C39  | Ti2  | C40  | 35.18(14)  | C39  | Ti2  | C41  | 57.88(14)  |
| C39  | Ti2  | C42  | 58.03(15)  | C40  | Ti2  | C41  | 34.35(15)  |
| C40  | Ti2  | C42  | 57.78(15)  | C41  | Ti2  | C42  | 34.88(14)  |
| Ti1  | O1   | C3   | 172.4(3)   | Ti2  | O2   | C22  | 173.9(3)   |
| Ti2  | O3   | C31  | 174.0(3)   | C1   | N1   | C20  | 112.2(3)   |
| C1   | N1   | C29  | 110.3(3)   | C20  | N1   | C29  | 110.0(3)   |
| N1   | C1   | C2   | 113.5(3)   | C1   | C2   | C3   | 121.7(3)   |
| C1   | C2   | C7   | 120.8(3)   | C3   | C2   | C7   | 117.4(3)   |
| O1   | C3   | C2   | 120.1(3)   | O1   | C3   | C4   | 118.2(3)   |
| C2   | C3   | C4   | 121.7(4)   | C3   | C4   | C5   | 118.0(4)   |
| C3   | C4   | C9   | 120.0(4)   | C5   | C4   | C9   | 122.0(4)   |
| C4   | C5   | C6   | 122.1(4)   | C5   | C6   | C7   | 118.5(4)   |

Table S8-6. Bond angles ( $^{\circ}$ ) (continued)

| atom | atom | atom | angle    | atom | atom | atom | angle    |
|------|------|------|----------|------|------|------|----------|
| C5   | C6   | C8   | 121.6(4) | C7   | C6   | C8   | 119.8(4) |
| C2   | C7   | C6   | 122.2(4) | Ti1  | C10  | C11  | 73.7(3)  |
| Ti1  | C10  | C14  | 72.2(3)  | Ti1  | C10  | C15  | 121.5(3) |
| C11  | C10  | C14  | 108.1(4) | C11  | C10  | C15  | 125.9(4) |
| C14  | C10  | C15  | 125.9(4) | Ti1  | C11  | C10  | 71.6(3)  |
| Ti1  | C11  | C12  | 73.9(3)  | Ti1  | C11  | C16  | 124.0(3) |
| C10  | C11  | C12  | 108.0(4) | C10  | C11  | C16  | 127.0(4) |
| C12  | C11  | C16  | 124.8(4) | Ti1  | C12  | C11  | 71.3(2)  |
| Ti1  | C12  | C13  | 72.7(3)  | Ti1  | C12  | C17  | 125.3(4) |
| C11  | C12  | C13  | 108.0(4) | C11  | C12  | C17  | 125.8(4) |
| C13  | C12  | C17  | 126.0(5) | Ti1  | C13  | C12  | 73.1(3)  |
| Ti1  | C13  | C14  | 70.2(2)  | Ti1  | C13  | C18  | 125.7(4) |
| C12  | C13  | C14  | 107.9(4) | C12  | C13  | C18  | 126.4(5) |
| C14  | C13  | C18  | 125.6(4) | Ti1  | C14  | C10  | 72.6(3)  |
| Ti1  | C14  | C13  | 74.9(3)  | Ti1  | C14  | C19  | 120.8(3) |
| C10  | C14  | C13  | 108.0(4) | C10  | C14  | C19  | 125.7(4) |
| C13  | C14  | C19  | 126.2(4) | N1   | C20  | C21  | 113.8(3) |
| C20  | C21  | C22  | 120.5(3) | C20  | C21  | C26  | 121.1(4) |
| C22  | C21  | C26  | 118.4(4) | O2   | C22  | C21  | 119.5(3) |
| O2   | C22  | C23  | 119.2(4) | C21  | C22  | C23  | 121.4(4) |
| C22  | C23  | C24  | 117.7(4) | C22  | C23  | C28  | 120.5(4) |
| C24  | C23  | C28  | 121.7(4) | C23  | C24  | C25  | 122.3(4) |
| C24  | C25  | C26  | 118.5(4) | C24  | C25  | C27  | 120.9(4) |
| C26  | C25  | C27  | 120.5(4) | C21  | C26  | C25  | 121.8(4) |
| N1   | C29  | C30  | 112.9(3) | C29  | C30  | C31  | 119.7(3) |
| C29  | C30  | C35  | 120.9(3) | C31  | C30  | C35  | 119.3(4) |
| O3   | C31  | C30  | 119.9(4) | O3   | C31  | C32  | 119.3(3) |
| C30  | C31  | C32  | 120.8(4) | C31  | C32  | C33  | 117.5(4) |
| C31  | C32  | C37  | 121.6(4) | C33  | C32  | C37  | 120.8(4) |
| C32  | C33  | C34  | 122.9(4) | C33  | C34  | C35  | 117.9(4) |
| C33  | C34  | C36  | 121.0(4) | C35  | C34  | C36  | 121.1(4) |
| C30  | C35  | C34  | 121.5(4) | Ti2  | C38  | C39  | 72.7(2)  |
| Ti2  | C38  | C42  | 70.0(2)  | Ti2  | C38  | C44  | 123.1(3) |
| C39  | C38  | C42  | 107.2(4) | C39  | C38  | C44  | 126.9(4) |
| C42  | C38  | C44  | 126.0(4) | Ti2  | C39  | C38  | 72.7(2)  |
| Ti2  | C39  | C40  | 72.1(2)  | Ti2  | C39  | C45  | 123.2(3) |
| C38  | C39  | C40  | 107.6(4) | C38  | C39  | C45  | 126.3(4) |

Table S8-6. Bond angles ( $^{\circ}$ ) (continued)

| atom | atom | atom | angle    | atom | atom | atom | angle    |
|------|------|------|----------|------|------|------|----------|
| C40  | C39  | C45  | 126.1(4) | Ti2  | C40  | C39  | 72.7(2)  |
| Ti2  | C40  | C41  | 72.2(2)  | Ti2  | C40  | C46  | 123.9(3) |
| C39  | C40  | C41  | 108.1(4) | C39  | C40  | C46  | 124.7(4) |
| C41  | C40  | C46  | 127.1(4) | Ti2  | C41  | C40  | 73.4(2)  |
| Ti2  | C41  | C42  | 71.1(2)  | Ti2  | C41  | C47  | 121.3(3) |
| C40  | C41  | C42  | 108.2(4) | C40  | C41  | C47  | 126.9(4) |
| C42  | C41  | C47  | 124.9(4) | Ti2  | C42  | C38  | 74.9(2)  |
| Ti2  | C42  | C41  | 74.1(2)  | Ti2  | C42  | C43  | 122.4(3) |
| C38  | C42  | C41  | 108.9(4) | C38  | C42  | C43  | 125.9(4) |
| C41  | C42  | C43  | 124.9(4) |      |      |      |          |

Table S8-7. Bond angles involving hydrogens ( $^{\circ}$ )

| atom | atom | atom | angle | atom | atom | atom | angle |
|------|------|------|-------|------|------|------|-------|
| N1   | C1   | H1A  | 108.9 | N1   | C1   | H1B  | 108.9 |
| C2   | C1   | H1A  | 108.9 | C2   | C1   | H1B  | 108.9 |
| H1A  | C1   | H1B  | 107.7 | C4   | C5   | H5   | 118.9 |
| C6   | C5   | H5   | 119.0 | C2   | C7   | H7   | 118.9 |
| C6   | C7   | H7   | 118.9 | C6   | C8   | H8A  | 109.5 |
| C6   | C8   | H8B  | 109.5 | C6   | C8   | H8C  | 109.5 |
| H8A  | C8   | H8B  | 109.5 | H8A  | C8   | H8C  | 109.5 |
| H8B  | C8   | H8C  | 109.5 | C4   | C9   | H9A  | 109.5 |
| C4   | C9   | H9B  | 109.5 | C4   | C9   | H9C  | 109.5 |
| H9A  | C9   | H9B  | 109.5 | H9A  | C9   | H9C  | 109.5 |
| H9B  | C9   | H9C  | 109.5 | C10  | C15  | H15A | 109.5 |
| C10  | C15  | H15B | 109.5 | C10  | C15  | H15C | 109.5 |
| H15A | C15  | H15B | 109.5 | H15A | C15  | H15C | 109.5 |
| H15B | C15  | H15C | 109.5 | C11  | C16  | H16A | 109.5 |
| C11  | C16  | H16B | 109.5 | C11  | C16  | H16C | 109.5 |
| H16A | C16  | H16B | 109.5 | H16A | C16  | H16C | 109.5 |
| H16B | C16  | H16C | 109.5 | C12  | C17  | H17A | 109.5 |
| C12  | C17  | H17B | 109.5 | C12  | C17  | H17C | 109.5 |
| H17A | C17  | H17B | 109.5 | H17A | C17  | H17C | 109.5 |
| H17B | C17  | H17C | 109.5 | C13  | C18  | H18A | 109.5 |
| C13  | C18  | H18B | 109.5 | C13  | C18  | H18C | 109.5 |
| H18A | C18  | H18B | 109.5 | H18A | C18  | H18C | 109.5 |
| H18B | C18  | H18C | 109.5 | C14  | C19  | H19A | 109.5 |
| C14  | C19  | H19B | 109.5 | C14  | C19  | H19C | 109.5 |
| H19A | C19  | H19B | 109.5 | H19A | C19  | H19C | 109.5 |
| H19B | C19  | H19C | 109.5 | N1   | C20  | H20A | 108.8 |
| N1   | C20  | H20B | 108.8 | C21  | C20  | H20A | 108.8 |
| C21  | C20  | H20B | 108.8 | H20A | C20  | H20B | 107.7 |
| C23  | C24  | H24  | 118.9 | C25  | C24  | H24  | 118.9 |
| C21  | C26  | H26  | 119.1 | C25  | C26  | H26  | 119.1 |
| C25  | C27  | H27A | 109.5 | C25  | C27  | H27B | 109.5 |
| C25  | C27  | H27C | 109.5 | H27A | C27  | H27B | 109.5 |
| H27A | C27  | H27C | 109.5 | H27B | C27  | H27C | 109.5 |
| C23  | C28  | H28A | 109.5 | C23  | C28  | H28B | 109.5 |
| C23  | C28  | H28C | 109.5 | H28A | C28  | H28B | 109.5 |
| H28A | C28  | H28C | 109.5 | H28B | C28  | H28C | 109.5 |
| N1   | C29  | H29A | 109.0 | N1   | C29  | H29B | 109.0 |

Table S8-7. Bond angles involving hydrogens ( $^{\circ}$ ) (continued)

| atom | atom | atom | angle | atom | atom | atom | angle |
|------|------|------|-------|------|------|------|-------|
| C30  | C29  | H29A | 109.0 | C30  | C29  | H29B | 109.0 |
| H29A | C29  | H29B | 107.8 | C32  | C33  | H33  | 118.5 |
| C34  | C33  | H33  | 118.5 | C30  | C35  | H35  | 119.3 |
| C34  | C35  | H35  | 119.3 | C34  | C36  | H36A | 109.5 |
| C34  | C36  | H36B | 109.5 | C34  | C36  | H36C | 109.5 |
| H36A | C36  | H36B | 109.5 | H36A | C36  | H36C | 109.5 |
| H36B | C36  | H36C | 109.5 | C32  | C37  | H37A | 109.5 |
| C32  | C37  | H37B | 109.5 | C32  | C37  | H37C | 109.5 |
| H37A | C37  | H37B | 109.5 | H37A | C37  | H37C | 109.5 |
| H37B | C37  | H37C | 109.5 | C42  | C43  | H43A | 109.5 |
| C42  | C43  | H43B | 109.5 | C42  | C43  | H43C | 109.5 |
| H43A | C43  | H43B | 109.5 | H43A | C43  | H43C | 109.5 |
| H43B | C43  | H43C | 109.5 | C38  | C44  | H44A | 109.5 |
| C38  | C44  | H44B | 109.5 | C38  | C44  | H44C | 109.5 |
| H44A | C44  | H44B | 109.5 | H44A | C44  | H44C | 109.5 |
| H44B | C44  | H44C | 109.5 | C39  | C45  | H45A | 109.5 |
| C39  | C45  | H45B | 109.5 | C39  | C45  | H45C | 109.5 |
| H45A | C45  | H45B | 109.5 | H45A | C45  | H45C | 109.5 |
| H45B | C45  | H45C | 109.5 | C40  | C46  | H46A | 109.5 |
| C40  | C46  | H46B | 109.5 | C40  | C46  | H46C | 109.5 |
| H46A | C46  | H46B | 109.5 | H46A | C46  | H46C | 109.5 |
| H46B | C46  | H46C | 109.5 | C41  | C47  | H47A | 109.5 |
| C41  | C47  | H47B | 109.5 | C41  | C47  | H47C | 109.5 |
| H47A | C47  | H47B | 109.5 | H47A | C47  | H47C | 109.5 |
| H47B | C47  | H47C | 109.5 |      |      |      |       |

Table S8-8. Torsion Angles(°)

(Those having bond angles &gt; 160 or &lt; 20 degrees are excluded.)

| atom1 | atom2 | atom3 | atom4 | angle       | atom1 | atom2 | atom3 | atom4 | angle       |
|-------|-------|-------|-------|-------------|-------|-------|-------|-------|-------------|
| Cl1   | Ti1   | C10   | C11   | -24.6(2)    | Cl1   | Ti1   | C10   | C14   | -140.39(12) |
| Cl1   | Ti1   | C10   | C15   | 97.9(3)     | Cl1   | Ti1   | C11   | C10   | 159.41(15)  |
| Cl1   | Ti1   | C11   | C12   | -84.79(16)  | Cl1   | Ti1   | C11   | C16   | 36.7(3)     |
| Cl1   | Ti1   | C12   | C11   | 94.39(16)   | Cl1   | Ti1   | C12   | C13   | -149.1(2)   |
| Cl1   | Ti1   | C12   | C17   | -26.8(3)    | Cl1   | Ti1   | C13   | C12   | 34.9(2)     |
| Cl1   | Ti1   | C13   | C14   | 151.58(12)  | Cl1   | Ti1   | C13   | C18   | -88.2(3)    |
| Cl1   | Ti1   | C14   | C10   | 67.6(3)     | Cl1   | Ti1   | C14   | C13   | -47.2(3)    |
| Cl1   | Ti1   | C14   | C19   | -170.69(14) | Cl2   | Ti1   | C10   | C11   | 126.53(13)  |
| Cl2   | Ti1   | C10   | C14   | 10.8(2)     | Cl2   | Ti1   | C10   | C15   | -110.9(2)   |
| Cl2   | Ti1   | C11   | C10   | -88.7(2)    | Cl2   | Ti1   | C11   | C12   | 27.1(3)     |
| Cl2   | Ti1   | C11   | C16   | 148.55(19)  | Cl2   | Ti1   | C12   | C11   | -162.64(13) |
| Cl2   | Ti1   | C12   | C13   | -46.1(2)    | Cl2   | Ti1   | C12   | C17   | 76.2(3)     |
| Cl2   | Ti1   | C13   | C12   | 136.90(19)  | Cl2   | Ti1   | C13   | C14   | -106.38(16) |
| Cl2   | Ti1   | C13   | C18   | 13.9(3)     | Cl2   | Ti1   | C14   | C10   | -171.71(15) |
| Cl2   | Ti1   | C14   | C13   | 73.45(16)   | Cl2   | Ti1   | C14   | C19   | -50.0(3)    |
| O1    | Ti1   | C10   | C11   | -128.59(17) | O1    | Ti1   | C10   | C14   | 115.63(18)  |
| O1    | Ti1   | C10   | C15   | -6.0(3)     | O1    | Ti1   | C11   | C10   | 55.91(19)   |
| O1    | Ti1   | C11   | C12   | 171.72(16)  | O1    | Ti1   | C11   | C16   | -66.8(3)    |
| O1    | Ti1   | C12   | C11   | -13.2(3)    | O1    | Ti1   | C12   | C13   | 103.3(3)    |
| O1    | Ti1   | C12   | C17   | -134.4(3)   | O1    | Ti1   | C13   | C12   | -120.4(2)   |
| O1    | Ti1   | C13   | C14   | -3.7(3)     | O1    | Ti1   | C13   | C18   | 116.5(3)    |
| O1    | Ti1   | C14   | C10   | -67.71(18)  | O1    | Ti1   | C14   | C13   | 177.45(15)  |
| O1    | Ti1   | C14   | C19   | 54.0(3)     | C10   | Ti1   | C11   | C10   | -0.00(18)   |
| C10   | Ti1   | C11   | C12   | 115.8(3)    | C10   | Ti1   | C11   | C16   | -122.7(4)   |
| C11   | Ti1   | C10   | C11   | -0.00(18)   | C11   | Ti1   | C10   | C14   | -115.8(3)   |
| C11   | Ti1   | C10   | C15   | 122.5(4)    | C10   | Ti1   | C12   | C11   | -37.30(17)  |
| C10   | Ti1   | C12   | C13   | 79.2(2)     | C10   | Ti1   | C12   | C17   | -158.5(4)   |
| C12   | Ti1   | C10   | C11   | 37.42(17)   | C12   | Ti1   | C10   | C14   | -78.4(2)    |
| C12   | Ti1   | C10   | C15   | 160.0(3)    | C10   | Ti1   | C13   | C12   | -78.5(2)    |
| C10   | Ti1   | C13   | C14   | 38.18(17)   | C10   | Ti1   | C13   | C18   | 158.4(4)    |
| C13   | Ti1   | C10   | C11   | 78.0(2)     | C13   | Ti1   | C10   | C14   | -37.81(16)  |
| C13   | Ti1   | C10   | C15   | -159.5(3)   | C10   | Ti1   | C14   | C10   | 0.00(19)    |
| C10   | Ti1   | C14   | C13   | -114.8(3)   | C10   | Ti1   | C14   | C19   | 121.7(4)    |
| C14   | Ti1   | C10   | C11   | 115.8(3)    | C14   | Ti1   | C10   | C14   | -0.00(19)   |
| C14   | Ti1   | C10   | C15   | -121.7(4)   | C11   | Ti1   | C12   | C11   | 0.00(19)    |
| C11   | Ti1   | C12   | C13   | 116.5(4)    | C11   | Ti1   | C12   | C17   | -121.2(4)   |
| C12   | Ti1   | C11   | C10   | -115.8(3)   | C12   | Ti1   | C11   | C12   | -0.00(19)   |



Table S8-8. Torsion angles ( $^{\circ}$ ) (continued)

| atom1 | atom2 | atom3 | atom4 | angle       | atom1 | atom2 | atom3 | atom4 | angle       |
|-------|-------|-------|-------|-------------|-------|-------|-------|-------|-------------|
| C12   | Ti1   | C11   | C16   | 121.5(5)    | C11   | Ti1   | C13   | C12   | -37.25(19)  |
| C11   | Ti1   | C13   | C14   | 79.5(2)     | C11   | Ti1   | C13   | C18   | -160.3(4)   |
| C13   | Ti1   | C11   | C10   | -79.3(2)    | C13   | Ti1   | C11   | C12   | 36.50(17)   |
| C13   | Ti1   | C11   | C16   | 158.0(4)    | C11   | Ti1   | C14   | C10   | 37.14(17)   |
| C11   | Ti1   | C14   | C13   | -77.7(2)    | C11   | Ti1   | C14   | C19   | 158.8(4)    |
| C14   | Ti1   | C11   | C10   | -37.77(17)  | C14   | Ti1   | C11   | C12   | 78.0(2)     |
| C14   | Ti1   | C11   | C16   | -160.5(4)   | C12   | Ti1   | C13   | C12   | 0.0(2)      |
| C12   | Ti1   | C13   | C14   | 116.7(4)    | C12   | Ti1   | C13   | C18   | -123.0(5)   |
| C13   | Ti1   | C12   | C11   | -116.5(4)   | C13   | Ti1   | C12   | C13   | 0.0(2)      |
| C13   | Ti1   | C12   | C17   | 122.3(5)    | C12   | Ti1   | C14   | C10   | 78.5(2)     |
| C12   | Ti1   | C14   | C13   | -36.35(18)  | C12   | Ti1   | C14   | C19   | -159.8(4)   |
| C14   | Ti1   | C12   | C11   | -79.3(2)    | C14   | Ti1   | C12   | C13   | 37.23(18)   |
| C14   | Ti1   | C12   | C17   | 159.5(4)    | C13   | Ti1   | C14   | C10   | 114.8(3)    |
| C13   | Ti1   | C14   | C13   | 0.00(18)    | C13   | Ti1   | C14   | C19   | -123.5(4)   |
| C14   | Ti1   | C13   | C12   | -116.7(3)   | C14   | Ti1   | C13   | C14   | 0.00(18)    |
| C14   | Ti1   | C13   | C18   | 120.3(4)    | Cl3   | Ti2   | C38   | C39   | -29.4(2)    |
| Cl3   | Ti2   | C38   | C42   | -145.62(11) | Cl3   | Ti2   | C38   | C44   | 93.8(3)     |
| Cl3   | Ti2   | C39   | C38   | 154.15(16)  | Cl3   | Ti2   | C39   | C40   | -90.20(15)  |
| Cl3   | Ti2   | C39   | C45   | 31.7(2)     | Cl3   | Ti2   | C40   | C39   | 87.93(15)   |
| Cl3   | Ti2   | C40   | C41   | -155.94(15) | Cl3   | Ti2   | C40   | C46   | -32.7(3)    |
| Cl3   | Ti2   | C41   | C40   | 27.61(19)   | Cl3   | Ti2   | C41   | C42   | 144.15(12)  |
| Cl3   | Ti2   | C41   | C47   | -95.9(2)    | Cl3   | Ti2   | C42   | C38   | 56.4(3)     |
| Cl3   | Ti2   | C42   | C41   | -58.8(3)    | Cl3   | Ti2   | C42   | C43   | 179.60(13)  |
| O2    | Ti2   | C38   | C39   | 118.22(19)  | O2    | Ti2   | C38   | C42   | 2.0(3)      |
| O2    | Ti2   | C38   | C44   | -118.6(3)   | O2    | Ti2   | C39   | C38   | -102.7(2)   |
| O2    | Ti2   | C39   | C40   | 12.9(3)     | O2    | Ti2   | C39   | C45   | 134.8(2)    |
| O2    | Ti2   | C40   | C39   | -171.59(16) | O2    | Ti2   | C40   | C41   | -55.46(19)  |
| O2    | Ti2   | C40   | C46   | 67.8(3)     | O2    | Ti2   | C41   | C40   | 127.67(17)  |
| O2    | Ti2   | C41   | C42   | -115.78(17) | O2    | Ti2   | C41   | C47   | 4.1(3)      |
| O2    | Ti2   | C42   | C38   | -178.60(15) | O2    | Ti2   | C42   | C41   | 66.17(18)   |
| O2    | Ti2   | C42   | C43   | -55.4(3)    | O3    | Ti2   | C38   | C39   | -129.30(18) |
| O3    | Ti2   | C38   | C42   | 114.47(18)  | O3    | Ti2   | C38   | C44   | -6.1(3)     |
| O3    | Ti2   | C39   | C38   | 54.2(2)     | O3    | Ti2   | C39   | C40   | 169.82(15)  |
| O3    | Ti2   | C39   | C45   | -68.3(3)    | O3    | Ti2   | C40   | C39   | -15.9(3)    |
| O3    | Ti2   | C40   | C41   | 100.2(3)    | O3    | Ti2   | C40   | C46   | -136.6(3)   |
| O3    | Ti2   | C41   | C40   | -120.44(19) | O3    | Ti2   | C41   | C42   | -3.9(3)     |
| O3    | Ti2   | C41   | C47   | 116.0(2)    | O3    | Ti2   | C42   | C38   | -67.55(18)  |

Table S8-8. Torsion angles ( $^{\circ}$ ) (continued)

| atom1 | atom2 | atom3 | atom4 | angle      | atom1 | atom2 | atom3 | atom4 | angle      |
|-------|-------|-------|-------|------------|-------|-------|-------|-------|------------|
| O3    | Ti2   | C42   | C41   | 177.22(16) | O3    | Ti2   | C42   | C43   | 55.6(3)    |
| C38   | Ti2   | C39   | C38   | -0.00(18)  | C38   | Ti2   | C39   | C40   | 115.6(3)   |
| C38   | Ti2   | C39   | C45   | -122.5(4)  | C39   | Ti2   | C38   | C39   | 0.00(18)   |
| C39   | Ti2   | C38   | C42   | -116.2(3)  | C39   | Ti2   | C38   | C44   | 123.2(4)   |
| C38   | Ti2   | C40   | C39   | -37.11(16) | C38   | Ti2   | C40   | C41   | 79.02(19)  |
| C38   | Ti2   | C40   | C46   | -157.8(4)  | C40   | Ti2   | C38   | C39   | 37.84(17)  |
| C40   | Ti2   | C38   | C42   | -78.40(19) | C40   | Ti2   | C38   | C44   | 161.0(3)   |
| C38   | Ti2   | C41   | C40   | -78.64(19) | C38   | Ti2   | C41   | C42   | 37.91(15)  |
| C38   | Ti2   | C41   | C47   | 157.8(3)   | C41   | Ti2   | C38   | C39   | 78.63(19)  |
| C41   | Ti2   | C38   | C42   | -37.61(16) | C41   | Ti2   | C38   | C44   | -158.2(3)  |
| C38   | Ti2   | C42   | C38   | 0.00(18)   | C38   | Ti2   | C42   | C41   | -115.2(3)  |
| C38   | Ti2   | C42   | C43   | 123.2(4)   | C42   | Ti2   | C38   | C39   | 116.2(3)   |
| C42   | Ti2   | C38   | C42   | -0.00(17)  | C42   | Ti2   | C38   | C44   | -120.6(4)  |
| C39   | Ti2   | C40   | C39   | -0.00(17)  | C39   | Ti2   | C40   | C41   | 116.1(3)   |
| C39   | Ti2   | C40   | C46   | -120.7(4)  | C40   | Ti2   | C39   | C38   | -115.6(3)  |
| C40   | Ti2   | C39   | C40   | -0.00(18)  | C40   | Ti2   | C39   | C45   | 121.9(4)   |
| C39   | Ti2   | C41   | C40   | -37.64(15) | C39   | Ti2   | C41   | C42   | 78.90(18)  |
| C39   | Ti2   | C41   | C47   | -161.2(3)  | C41   | Ti2   | C39   | C38   | -78.92(19) |
| C41   | Ti2   | C39   | C40   | 36.73(15)  | C41   | Ti2   | C39   | C45   | 158.6(3)   |
| C39   | Ti2   | C42   | C38   | 36.81(15)  | C39   | Ti2   | C42   | C41   | -78.42(19) |
| C39   | Ti2   | C42   | C43   | 160.0(3)   | C42   | Ti2   | C39   | C38   | -37.50(16) |
| C42   | Ti2   | C39   | C40   | 78.15(19)  | C42   | Ti2   | C39   | C45   | -160.0(3)  |
| C40   | Ti2   | C41   | C40   | -0.00(17)  | C40   | Ti2   | C41   | C42   | 116.5(3)   |
| C40   | Ti2   | C41   | C47   | -123.5(4)  | C41   | Ti2   | C40   | C39   | -116.1(3)  |
| C41   | Ti2   | C40   | C41   | 0.00(16)   | C41   | Ti2   | C40   | C46   | 123.2(4)   |
| C40   | Ti2   | C42   | C38   | 78.60(19)  | C40   | Ti2   | C42   | C41   | -36.63(16) |
| C40   | Ti2   | C42   | C43   | -158.2(3)  | C42   | Ti2   | C40   | C39   | -78.92(19) |
| C42   | Ti2   | C40   | C41   | 37.21(16)  | C42   | Ti2   | C40   | C46   | 160.4(4)   |
| C41   | Ti2   | C42   | C38   | 115.2(3)   | C41   | Ti2   | C42   | C41   | 0.00(17)   |
| C41   | Ti2   | C42   | C43   | -121.6(4)  | C42   | Ti2   | C41   | C40   | -116.5(3)  |
| C42   | Ti2   | C41   | C42   | 0.00(18)   | C42   | Ti2   | C41   | C47   | 119.9(4)   |
| C1    | N1    | C20   | C21   | 79.9(4)    | C20   | N1    | C1    | C2    | -70.1(4)   |
| C1    | N1    | C29   | C30   | -71.1(4)   | C29   | N1    | C1    | C2    | 166.9(3)   |
| C20   | N1    | C29   | C30   | 164.6(3)   | C29   | N1    | C20   | C21   | -156.9(3)  |
| N1    | C1    | C2    | C3    | 134.1(3)   | N1    | C1    | C2    | C7    | -43.6(5)   |
| C1    | C2    | C3    | O1    | -2.0(6)    | C1    | C2    | C3    | C4    | -179.4(3)  |
| C1    | C2    | C7    | C6    | 177.0(3)   | C3    | C2    | C7    | C6    | -0.8(6)    |

Table S8-8. Torsion angles ( $^{\circ}$ ) (continued)

| atom1 | atom2 | atom3 | atom4 | angle     | atom1 | atom2 | atom3 | atom4 | angle     |
|-------|-------|-------|-------|-----------|-------|-------|-------|-------|-----------|
| C7    | C2    | C3    | O1    | 175.8(3)  | C7    | C2    | C3    | C4    | -1.6(6)   |
| O1    | C3    | C4    | C5    | -174.8(3) | O1    | C3    | C4    | C9    | 4.8(6)    |
| C2    | C3    | C4    | C5    | 2.7(6)    | C2    | C3    | C4    | C9    | -177.7(3) |
| C3    | C4    | C5    | C6    | -1.3(6)   | C9    | C4    | C5    | C6    | 179.1(4)  |
| C4    | C5    | C6    | C7    | -1.0(6)   | C4    | C5    | C6    | C8    | 176.2(4)  |
| C5    | C6    | C7    | C2    | 2.1(6)    | C8    | C6    | C7    | C2    | -175.1(3) |
| Ti1   | C10   | C11   | Ti1   | 0.000(17) | Ti1   | C10   | C11   | C12   | -65.4(3)  |
| Ti1   | C10   | C11   | C16   | 119.2(4)  | Ti1   | C10   | C14   | Ti1   | 0.000(18) |
| Ti1   | C10   | C14   | C13   | 67.1(3)   | Ti1   | C10   | C14   | C19   | -115.8(4) |
| C11   | C10   | C14   | Ti1   | -65.4(3)  | C11   | C10   | C14   | C13   | 1.6(5)    |
| C11   | C10   | C14   | C19   | 178.7(4)  | C14   | C10   | C11   | Ti1   | 64.4(3)   |
| C14   | C10   | C11   | C12   | -1.0(5)   | C14   | C10   | C11   | C16   | -176.4(4) |
| C15   | C10   | C11   | Ti1   | -117.4(5) | C15   | C10   | C11   | C12   | 177.2(4)  |
| C15   | C10   | C11   | C16   | 1.8(7)    | C15   | C10   | C14   | Ti1   | 116.4(5)  |
| C15   | C10   | C14   | C13   | -176.6(4) | C15   | C10   | C14   | C19   | 0.5(7)    |
| Ti1   | C11   | C12   | Ti1   | 0.000(18) | Ti1   | C11   | C12   | C13   | -63.9(3)  |
| Ti1   | C11   | C12   | C17   | 120.6(4)  | C10   | C11   | C12   | Ti1   | 63.9(3)   |
| C10   | C11   | C12   | C13   | 0.0(5)    | C10   | C11   | C12   | C17   | -175.5(4) |
| C16   | C11   | C12   | Ti1   | -120.6(5) | C16   | C11   | C12   | C13   | 175.5(4)  |
| C16   | C11   | C12   | C17   | -0.0(7)   | Ti1   | C12   | C13   | Ti1   | 0.00(2)   |
| Ti1   | C12   | C13   | C14   | -62.0(3)  | Ti1   | C12   | C13   | C18   | 122.3(4)  |
| C11   | C12   | C13   | Ti1   | 63.0(3)   | C11   | C12   | C13   | C14   | 1.0(5)    |
| C11   | C12   | C13   | C18   | -174.7(4) | C17   | C12   | C13   | Ti1   | -121.5(5) |
| C17   | C12   | C13   | C14   | 176.5(4)  | C17   | C12   | C13   | C18   | 0.7(8)    |
| Ti1   | C13   | C14   | Ti1   | 0.000(17) | Ti1   | C13   | C14   | C10   | -65.5(2)  |
| Ti1   | C13   | C14   | C19   | 117.4(4)  | C12   | C13   | C14   | Ti1   | 63.9(3)   |
| C12   | C13   | C14   | C10   | -1.6(5)   | C12   | C13   | C14   | C19   | -178.7(4) |
| C18   | C13   | C14   | Ti1   | -120.3(5) | C18   | C13   | C14   | C10   | 174.2(4)  |
| C18   | C13   | C14   | C19   | -2.9(7)   | N1    | C20   | C21   | C22   | 61.5(4)   |
| N1    | C20   | C21   | C26   | -117.4(4) | C20   | C21   | C22   | O2    | -1.7(5)   |
| C20   | C21   | C22   | C23   | 179.7(3)  | C20   | C21   | C26   | C25   | 177.9(3)  |
| C22   | C21   | C26   | C25   | -1.0(6)   | C26   | C21   | C22   | O2    | 177.2(3)  |
| C26   | C21   | C22   | C23   | -1.3(6)   | O2    | C22   | C23   | C24   | -176.0(3) |
| O2    | C22   | C23   | C28   | 1.8(5)    | C21   | C22   | C23   | C24   | 2.5(6)    |
| C21   | C22   | C23   | C28   | -179.7(3) | C22   | C23   | C24   | C25   | -1.5(6)   |
| C28   | C23   | C24   | C25   | -179.3(4) | C23   | C24   | C25   | C26   | -0.7(6)   |
| C23   | C24   | C25   | C27   | 176.6(4)  | C24   | C25   | C26   | C21   | 2.0(6)    |

Table S8-8. Torsion angles ( $^{\circ}$ ) (continued)

| atom1 | atom2 | atom3 | atom4 | angle     | atom1 | atom2 | atom3 | atom4 | angle      |
|-------|-------|-------|-------|-----------|-------|-------|-------|-------|------------|
| C27   | C25   | C26   | C21   | -175.3(4) | N1    | C29   | C30   | C31   | -62.8(4)   |
| N1    | C29   | C30   | C35   | 120.3(3)  | C29   | C30   | C31   | O3    | 2.9(5)     |
| C29   | C30   | C31   | C32   | -178.2(3) | C29   | C30   | C35   | C34   | 178.8(3)   |
| C31   | C30   | C35   | C34   | 1.9(5)    | C35   | C30   | C31   | O3    | 179.9(3)   |
| C35   | C30   | C31   | C32   | -1.2(5)   | O3    | C31   | C32   | C33   | 178.5(3)   |
| O3    | C31   | C32   | C37   | -2.8(5)   | C30   | C31   | C32   | C33   | -0.3(5)    |
| C30   | C31   | C32   | C37   | 178.3(3)  | C31   | C32   | C33   | C34   | 1.4(5)     |
| C37   | C32   | C33   | C34   | -177.3(3) | C32   | C33   | C34   | C35   | -0.8(5)    |
| C32   | C33   | C34   | C36   | 179.6(3)  | C33   | C34   | C35   | C30   | -0.9(5)    |
| C36   | C34   | C35   | C30   | 178.8(3)  | Ti2   | C38   | C39   | Ti2   | -0.000(19) |
| Ti2   | C38   | C39   | C40   | -64.1(2)  | Ti2   | C38   | C39   | C45   | 118.9(3)   |
| Ti2   | C38   | C42   | Ti2   | 0.000(18) | Ti2   | C38   | C42   | C41   | 66.8(2)    |
| Ti2   | C38   | C42   | C43   | -119.3(3) | C39   | C38   | C42   | Ti2   | -63.7(3)   |
| C39   | C38   | C42   | C41   | 3.1(4)    | C39   | C38   | C42   | C43   | 176.9(3)   |
| C42   | C38   | C39   | Ti2   | 61.9(3)   | C42   | C38   | C39   | C40   | -2.2(4)    |
| C42   | C38   | C39   | C45   | -179.2(3) | C44   | C38   | C39   | Ti2   | -118.8(4)  |
| C44   | C38   | C39   | C40   | 177.1(3)  | C44   | C38   | C39   | C45   | 0.1(6)     |
| C44   | C38   | C42   | Ti2   | 117.0(4)  | C44   | C38   | C42   | C41   | -176.2(3)  |
| C44   | C38   | C42   | C43   | -2.4(6)   | Ti2   | C39   | C40   | Ti2   | -0.000(19) |
| Ti2   | C39   | C40   | C41   | -64.0(2)  | Ti2   | C39   | C40   | C46   | 119.7(3)   |
| C38   | C39   | C40   | Ti2   | 64.6(3)   | C38   | C39   | C40   | C41   | 0.5(4)     |
| C38   | C39   | C40   | C46   | -175.7(3) | C45   | C39   | C40   | Ti2   | -118.5(4)  |
| C45   | C39   | C40   | C41   | 177.5(3)  | C45   | C39   | C40   | C46   | 1.3(6)     |
| Ti2   | C40   | C41   | Ti2   | 0.00(2)   | Ti2   | C40   | C41   | C42   | -63.0(2)   |
| Ti2   | C40   | C41   | C47   | 117.1(3)  | C39   | C40   | C41   | Ti2   | 64.4(3)    |
| C39   | C40   | C41   | C42   | 1.4(4)    | C39   | C40   | C41   | C47   | -178.5(3)  |
| C46   | C40   | C41   | Ti2   | -119.5(4) | C46   | C40   | C41   | C42   | 177.6(3)   |
| C46   | C40   | C41   | C47   | -2.4(6)   | Ti2   | C41   | C42   | Ti2   | -0.000(18) |
| Ti2   | C41   | C42   | C38   | -67.4(2)  | Ti2   | C41   | C42   | C43   | 118.7(3)   |
| C40   | C41   | C42   | Ti2   | 64.5(3)   | C40   | C41   | C42   | C38   | -2.8(4)    |
| C40   | C41   | C42   | C43   | -176.7(3) | C47   | C41   | C42   | Ti2   | -115.5(4)  |
| C47   | C41   | C42   | C38   | 177.1(3)  | C47   | C41   | C42   | C43   | 3.2(6)     |

Table S8-9. Intramolecular contacts less than 3.60 Å

| atom | atom | distance | atom | atom | distance |
|------|------|----------|------|------|----------|
| Cl1  | C16  | 3.544(6) | Cl1  | C17  | 3.415(6) |
| Cl2  | C18  | 3.255(6) | Cl3  | C45  | 3.387(5) |
| Cl3  | C46  | 3.434(5) | O1   | C1   | 2.876(5) |
| O1   | C9   | 2.814(6) | O1   | C15  | 3.119(6) |
| O2   | N1   | 2.992(4) | O2   | C7   | 3.546(5) |
| O2   | C20  | 2.847(5) | O2   | C28  | 2.836(5) |
| O2   | C47  | 3.067(5) | O3   | N1   | 2.974(4) |
| O3   | C29  | 2.832(5) | O3   | C37  | 2.862(6) |
| O3   | C44  | 3.148(5) | N1   | C7   | 2.960(5) |
| N1   | C22  | 3.114(5) | N1   | C26  | 3.571(6) |
| N1   | C31  | 3.094(5) | N1   | C35  | 3.576(5) |
| C1   | C21  | 3.172(6) | C1   | C30  | 3.034(5) |
| C2   | C5   | 2.798(5) | C2   | C20  | 3.051(6) |
| C2   | C21  | 3.048(6) | C2   | C26  | 3.317(6) |
| C3   | C6   | 2.790(6) | C3   | C15  | 3.431(7) |
| C3   | C26  | 3.453(6) | C4   | C7   | 2.787(6) |
| C7   | C20  | 3.543(6) | C7   | C21  | 3.120(6) |
| C7   | C22  | 3.181(6) | C7   | C26  | 3.551(6) |
| C15  | C16  | 3.193(7) | C15  | C19  | 3.176(7) |
| C16  | C17  | 3.160(9) | C17  | C18  | 3.169(8) |
| C18  | C19  | 3.179(8) | C21  | C24  | 2.778(6) |
| C22  | C25  | 2.786(6) | C23  | C26  | 2.790(6) |
| C30  | C33  | 2.771(6) | C31  | C34  | 2.806(6) |
| C31  | C44  | 3.495(6) | C32  | C35  | 2.800(6) |
| C43  | C44  | 3.194(7) | C43  | C47  | 3.131(6) |
| C44  | C45  | 3.202(7) | C45  | C46  | 3.179(7) |
| C46  | C47  | 3.210(7) |      |      |          |

Table S8-10. Intramolecular contacts less than 3.60 Å involving hydrogens

| atom | atom | distance | atom | atom | distance |
|------|------|----------|------|------|----------|
| Ti1  | H1B  | 3.122    | Ti1  | H9A  | 3.238    |
| Ti1  | H15C | 3.320    | Ti1  | H16B | 3.403    |
| Ti1  | H17C | 3.457    | Ti1  | H18B | 3.466    |
| Ti1  | H19C | 3.288    | Ti2  | H28A | 3.194    |
| Ti2  | H29A | 3.579    | Ti2  | H37A | 3.312    |
| Ti2  | H43B | 3.345    | Ti2  | H44C | 3.399    |
| Ti2  | H45B | 3.395    | Ti2  | H46C | 3.417    |
| Ti2  | H47B | 3.334    | Cl1  | H1B  | 2.975    |
| Cl1  | H16A | 3.418    | Cl1  | H16B | 3.320    |
| Cl1  | H17A | 3.333    | Cl1  | H17C | 3.127    |
| Cl1  | H20A | 3.201    | Cl2  | H9A  | 3.051    |
| Cl2  | H18A | 3.269    | Cl2  | H18B | 2.858    |
| Cl2  | H19A | 3.562    | Cl2  | H19C | 3.582    |
| Cl3  | H8A  | 3.476    | Cl3  | H28A | 3.031    |
| Cl3  | H37A | 3.214    | Cl3  | H45A | 3.267    |
| Cl3  | H45B | 3.117    | Cl3  | H46A | 3.308    |
| Cl3  | H46C | 3.184    | O1   | H1A  | 3.373    |
| O1   | H1B  | 2.430    | O1   | H9A  | 2.344    |
| O1   | H9B  | 3.483    | O1   | H9C  | 3.430    |
| O1   | H15A | 3.299    | O1   | H15C | 2.681    |
| O1   | H19C | 3.285    | O1   | H26  | 3.457    |
| O2   | H7   | 2.981    | O2   | H20B | 2.807    |
| O2   | H28A | 2.372    | O2   | H28B | 3.509    |
| O2   | H28C | 3.449    | O2   | H43B | 3.305    |
| O2   | H47A | 3.257    | O2   | H47B | 2.611    |
| O3   | H7   | 3.425    | O3   | H29A | 2.782    |
| O3   | H37A | 2.412    | O3   | H37B | 3.505    |
| O3   | H37C | 3.504    | O3   | H44A | 3.322    |
| O3   | H44C | 2.722    | N1   | H7   | 2.731    |
| C1   | H7   | 2.665    | C1   | H15C | 2.842    |
| C1   | H16B | 2.931    | C1   | H20A | 2.503    |
| C1   | H20B | 3.231    | C1   | H29A | 3.232    |
| C1   | H29B | 2.526    | C2   | H15C | 2.832    |
| C2   | H20A | 3.178    | C2   | H26  | 3.422    |
| C3   | H1A  | 3.053    | C3   | H1B  | 2.577    |
| C3   | H5   | 3.240    | C3   | H7   | 3.236    |
| C3   | H9A  | 2.556    | C3   | H9B  | 3.140    |

Table S8-10. Intramolecular contacts less than 3.60 Å involving hydrogens (continued)

| atom | atom | distance | atom | atom | distance |
|------|------|----------|------|------|----------|
| C3   | H9C  | 3.135    | C3   | H15A | 3.467    |
| C3   | H15C | 2.762    | C3   | H26  | 3.309    |
| C4   | H27C | 3.351    | C5   | H7   | 3.220    |
| C5   | H8A  | 3.302    | C5   | H8B  | 2.775    |
| C5   | H8C  | 2.775    | C5   | H9A  | 3.311    |
| C5   | H9B  | 2.785    | C5   | H9C  | 2.785    |
| C5   | H27C | 3.597    | C7   | H1A  | 2.873    |
| C7   | H1B  | 3.295    | C7   | H5   | 3.221    |
| C7   | H8A  | 2.548    | C7   | H8B  | 3.109    |
| C7   | H8C  | 3.140    | C8   | H5   | 2.672    |
| C8   | H7   | 2.645    | C8   | H28C | 3.144    |
| C9   | H5   | 2.686    | C9   | H19C | 3.140    |
| C9   | H27C | 3.441    | C10  | H16A | 3.353    |
| C10  | H16B | 2.863    | C10  | H16C | 2.862    |
| C10  | H19A | 3.353    | C10  | H19B | 2.850    |
| C10  | H19C | 2.850    | C11  | H1B  | 3.459    |
| C11  | H15A | 3.344    | C11  | H15B | 2.846    |
| C11  | H15C | 2.845    | C11  | H17A | 2.660    |
| C11  | H17B | 3.168    | C11  | H17C | 3.221    |
| C12  | H16A | 2.656    | C12  | H16B | 3.224    |
| C12  | H16C | 3.170    | C12  | H18A | 3.340    |
| C12  | H18B | 2.842    | C12  | H18C | 2.842    |
| C13  | H17A | 3.338    | C13  | H17B | 2.837    |
| C13  | H17C | 2.838    | C13  | H19A | 2.674    |
| C13  | H19B | 3.186    | C13  | H19C | 3.219    |
| C14  | H15A | 2.666    | C14  | H15B | 3.187    |
| C14  | H15C | 3.208    | C14  | H18A | 2.653    |
| C14  | H18B | 3.213    | C14  | H18C | 3.163    |
| C15  | H1A  | 3.356    | C15  | H1B  | 3.591    |
| C15  | H16B | 3.156    | C15  | H16C | 3.176    |
| C15  | H19B | 3.138    | C15  | H19C | 3.144    |
| C16  | H1A  | 3.510    | C16  | H1B  | 3.204    |
| C16  | H15B | 3.152    | C16  | H15C | 3.171    |
| C16  | H17A | 2.726    | C16  | H35  | 3.352    |
| C17  | H16A | 2.726    | C17  | H18B | 3.135    |
| C17  | H18C | 3.143    | C18  | H17B | 3.133    |
| C18  | H17C | 3.141    | C18  | H19A | 2.757    |

Table S8-10. Intramolecular contacts less than 3.60 Å involving hydrogens (continued)

| atom | atom | distance | atom | atom | distance |
|------|------|----------|------|------|----------|
| C19  | H9A  | 3.364    | C19  | H15A | 2.747    |
| C19  | H18A | 2.747    | C20  | H1A  | 3.252    |
| C20  | H1B  | 2.562    | C20  | H7   | 3.489    |
| C20  | H26  | 2.677    | C20  | H29A | 2.483    |
| C20  | H29B | 2.705    | C20  | H43B | 3.166    |
| C21  | H1B  | 3.452    | C21  | H7   | 3.186    |
| C22  | H7   | 2.971    | C22  | H20A | 3.313    |
| C22  | H20B | 2.768    | C22  | H24  | 3.232    |
| C22  | H26  | 3.236    | C22  | H28A | 2.557    |
| C22  | H28B | 3.145    | C22  | H28C | 3.121    |
| C22  | H47B | 2.932    | C23  | H8A  | 3.469    |
| C23  | H8B  | 3.176    | C23  | H47B | 3.141    |
| C24  | H8B  | 3.243    | C24  | H26  | 3.218    |
| C24  | H27A | 2.575    | C24  | H27B | 3.154    |
| C24  | H27C | 3.125    | C24  | H28A | 3.304    |
| C24  | H28B | 2.775    | C24  | H28C | 2.775    |
| C26  | H20A | 2.570    | C26  | H20B | 3.150    |
| C26  | H24  | 3.216    | C26  | H27A | 3.298    |
| C26  | H27B | 2.765    | C26  | H27C | 2.765    |
| C27  | H24  | 2.667    | C27  | H26  | 2.658    |
| C28  | H8A  | 3.420    | C28  | H8B  | 3.255    |
| C28  | H24  | 2.676    | C28  | H46C | 3.190    |
| C28  | H47B | 3.062    | C29  | H1A  | 2.490    |
| C29  | H1B  | 2.679    | C29  | H16B | 3.582    |
| C29  | H20A | 2.761    | C29  | H20B | 2.434    |
| C29  | H35  | 2.673    | C29  | H43A | 3.557    |
| C29  | H43B | 3.273    | C30  | H1A  | 2.611    |
| C30  | H1B  | 3.513    | C31  | H1A  | 3.385    |
| C31  | H29A | 2.748    | C31  | H29B | 3.307    |
| C31  | H33  | 3.240    | C31  | H35  | 3.245    |
| C31  | H37A | 2.582    | C31  | H37B | 3.156    |
| C31  | H37C | 3.142    | C31  | H44A | 3.473    |
| C31  | H44C | 2.884    | C32  | H44C | 2.938    |
| C33  | H35  | 3.221    | C33  | H36A | 3.291    |
| C33  | H36B | 2.759    | C33  | H36C | 2.759    |
| C33  | H37A | 3.307    | C33  | H37B | 2.769    |
| C33  | H37C | 2.769    | C35  | H1A  | 3.018    |



Table S8-10. Intramolecular contacts less than 3.60 Å involving hydrogens (continued)

| atom | atom | distance | atom | atom | distance |
|------|------|----------|------|------|----------|
| C35  | H16B | 3.429    | C35  | H29A | 3.133    |
| C35  | H29B | 2.565    | C35  | H33  | 3.219    |
| C35  | H36A | 2.570    | C35  | H36B | 3.141    |
| C35  | H36C | 3.137    | C36  | H33  | 2.647    |
| C36  | H35  | 2.677    | C37  | H33  | 2.663    |
| C37  | H44C | 2.840    | C37  | H45B | 3.277    |
| C38  | H43A | 2.683    | C38  | H43B | 3.248    |
| C38  | H43C | 3.177    | C38  | H45A | 3.353    |
| C38  | H45B | 2.851    | C38  | H45C | 2.851    |
| C39  | H37A | 3.590    | C39  | H44A | 3.361    |
| C39  | H44B | 2.865    | C39  | H44C | 2.865    |
| C39  | H46A | 2.662    | C39  | H46B | 3.187    |
| C39  | H46C | 3.232    | C40  | H28A | 3.483    |
| C40  | H45A | 2.676    | C40  | H45B | 3.231    |
| C40  | H45C | 3.196    | C40  | H47A | 3.345    |
| C40  | H47B | 2.853    | C40  | H47C | 2.853    |
| C41  | H43A | 3.348    | C41  | H43B | 2.840    |
| C41  | H43C | 2.840    | C41  | H46A | 3.352    |
| C41  | H46B | 2.862    | C41  | H46C | 2.862    |
| C42  | H29A | 3.520    | C42  | H44A | 2.668    |
| C42  | H44B | 3.199    | C42  | H44C | 3.207    |
| C42  | H47A | 2.634    | C42  | H47B | 3.175    |
| C42  | H47C | 3.175    | C43  | H20B | 3.179    |
| C43  | H29A | 2.865    | C43  | H44A | 2.762    |
| C43  | H47A | 2.684    | C44  | H37A | 3.426    |
| C44  | H37C | 3.590    | C44  | H43A | 2.772    |
| C44  | H45B | 3.170    | C44  | H45C | 3.171    |
| C45  | H37A | 3.345    | C45  | H44B | 3.174    |
| C45  | H44C | 3.175    | C45  | H46A | 2.741    |
| C46  | H28A | 3.239    | C46  | H45A | 2.746    |
| C46  | H47B | 3.196    | C46  | H47C | 3.171    |
| C47  | H28A | 3.478    | C47  | H43B | 3.074    |
| C47  | H43C | 3.109    | C47  | H46B | 3.199    |
| C47  | H46C | 3.174    | H1A  | H7   | 2.880    |
| H1A  | H15C | 2.454    | H1A  | H16B | 2.629    |
| H1A  | H20A | 3.370    | H1A  | H29A | 3.423    |
| H1A  | H29B | 2.604    | H1A  | H35  | 3.095    |

Table S8-10. Intramolecular contacts less than 3.60 Å involving hydrogens (continued)

| atom | atom | distance | atom | atom | distance |
|------|------|----------|------|------|----------|
| H1B  | H7   | 3.567    | H1B  | H15C | 2.803    |
| H1B  | H16B | 2.357    | H1B  | H20A | 2.254    |
| H1B  | H20B | 3.348    | H1B  | H26  | 3.590    |
| H1B  | H29A | 3.476    | H1B  | H29B | 2.443    |
| H5   | H8A  | 3.578    | H5   | H8B  | 2.737    |
| H5   | H8C  | 2.706    | H5   | H9A  | 3.591    |
| H5   | H9B  | 2.739    | H5   | H9C  | 2.731    |
| H7   | H8A  | 2.324    | H7   | H8B  | 3.284    |
| H7   | H8C  | 3.299    | H8A  | H28A | 3.483    |
| H8A  | H28C | 2.876    | H8B  | H24  | 3.246    |
| H8B  | H28C | 2.562    | H9A  | H19C | 2.512    |
| H9B  | H19C | 2.975    | H9C  | H27C | 2.800    |
| H15A | H19B | 2.591    | H15A | H19C | 2.582    |
| H15B | H16B | 3.222    | H15B | H16C | 2.846    |
| H15B | H19B | 3.565    | H15C | H16B | 2.846    |
| H15C | H16C | 3.276    | H16A | H17A | 2.059    |
| H16A | H17B | 3.316    | H16A | H17C | 3.389    |
| H16A | H35  | 3.551    | H16B | H17A | 3.390    |
| H16B | H29B | 2.902    | H16B | H35  | 2.771    |
| H16C | H17A | 3.316    | H16C | H35  | 3.240    |
| H17B | H18B | 3.213    | H17B | H18C | 2.817    |
| H17C | H18B | 2.817    | H17C | H18C | 3.234    |
| H18A | H19A | 2.093    | H18A | H19B | 3.334    |
| H18A | H19C | 3.416    | H18B | H19A | 3.402    |
| H18C | H19A | 3.368    | H20A | H26  | 2.357    |
| H20A | H29A | 2.940    | H20A | H29B | 2.708    |
| H20B | H26  | 3.328    | H20B | H29A | 2.119    |
| H20B | H29B | 2.776    | H20B | H43A | 3.530    |
| H20B | H43B | 2.249    | H20B | H47A | 3.539    |
| H24  | H27A | 2.359    | H24  | H27B | 3.324    |
| H24  | H27C | 3.302    | H24  | H28A | 3.582    |
| H24  | H28B | 2.720    | H24  | H28C | 2.726    |
| H26  | H27A | 3.566    | H26  | H27B | 2.684    |
| H26  | H27C | 2.723    | H28A | H46C | 2.388    |
| H28A | H47B | 2.666    | H28B | H46C | 3.207    |
| H28B | H47B | 2.983    | H29A | H35  | 3.313    |
| H29A | H43A | 2.612    | H29A | H43B | 2.370    |

Table S8-10. Intramolecular contacts less than 3.60 Å involving hydrogens (continued)

| atom | atom | distance | atom | atom | distance |
|------|------|----------|------|------|----------|
| H29A | H44A | 3.568    | H29B | H35  | 2.353    |
| H33  | H36A | 3.556    | H33  | H36B | 2.695    |
| H33  | H36C | 2.691    | H33  | H37A | 3.573    |
| H33  | H37B | 2.695    | H33  | H37C | 2.717    |
| H35  | H36A | 2.365    | H35  | H36B | 3.321    |
| H35  | H36C | 3.323    | H37A | H44C | 2.584    |
| H37A | H45B | 2.485    | H37C | H44C | 2.645    |
| H37C | H45B | 3.258    | H43A | H44A | 2.109    |
| H43A | H44B | 3.398    | H43A | H44C | 3.401    |
| H43B | H44A | 3.442    | H43B | H47A | 2.487    |
| H43B | H47B | 3.544    | H43C | H44A | 3.336    |
| H43C | H47A | 2.557    | H43C | H47C | 3.530    |
| H44B | H45B | 3.256    | H44B | H45C | 2.856    |
| H44C | H45B | 2.856    | H44C | H45C | 3.260    |
| H45A | H46A | 2.078    | H45A | H46B | 3.349    |
| H45A | H46C | 3.397    | H45B | H46A | 3.400    |
| H45C | H46A | 3.338    | H46B | H47B | 3.308    |
| H46B | H47C | 2.873    | H46C | H47B | 2.874    |
| H46C | H47C | 3.238    |      |      |          |

Table S8-11. Intermolecular contacts less than 3.60 Å

| atom | atom             | distance | atom | atom             | distance |
|------|------------------|----------|------|------------------|----------|
| Cl3  | C11 <sup>1</sup> | 3.577(5) | Cl3  | C12 <sup>1</sup> | 3.484(5) |
| C5   | C20 <sup>2</sup> | 3.599(6) | C6   | C20 <sup>2</sup> | 3.450(6) |
| C8   | C20 <sup>2</sup> | 3.499(6) | C11  | Cl3 <sup>3</sup> | 3.577(5) |
| C12  | Cl3 <sup>3</sup> | 3.484(5) | C20  | C5 <sup>4</sup>  | 3.599(6) |
| C20  | C6 <sup>4</sup>  | 3.450(6) | C20  | C8 <sup>4</sup>  | 3.499(6) |
| C33  | C41 <sup>2</sup> | 3.540(5) | C37  | C42 <sup>2</sup> | 3.594(6) |
| C41  | C33 <sup>4</sup> | 3.540(5) | C42  | C37 <sup>4</sup> | 3.594(6) |

Symmetry Operators:

(1)  $-X+1, Y+1/2-1, -Z+1/2$   
 (3)  $-X+1, Y+1/2, -Z+1/2$

(2)  $X, -Y+1, Z$   
 (4)  $X, -Y+1, Z+1$

Table S8-12. Intermolecular contacts less than 3.60 Å involving hydrogens

| atom | atom               | distance | atom | atom               | distance |
|------|--------------------|----------|------|--------------------|----------|
| Cl1  | H5 <sup>1</sup>    | 3.512    | Cl1  | H36A <sup>2</sup>  | 3.512    |
| Cl2  | H33 <sup>3</sup>   | 2.928    | Cl2  | H37C <sup>3</sup>  | 3.518    |
| Cl2  | H45C <sup>4</sup>  | 3.036    | Cl3  | H17B <sup>5</sup>  | 3.476    |
| Cl3  | H43A <sup>6</sup>  | 3.212    | Cl3  | H43C <sup>6</sup>  | 3.265    |
| O3   | H43C <sup>6</sup>  | 2.859    | N1   | H8C <sup>1</sup>   | 3.492    |
| C1   | H47A <sup>6</sup>  | 3.173    | C2   | H47A <sup>6</sup>  | 3.239    |
| C5   | H20A <sup>6</sup>  | 3.118    | C5   | H20B <sup>6</sup>  | 3.329    |
| C5   | H26 <sup>6</sup>   | 3.496    | C6   | H20A <sup>6</sup>  | 3.183    |
| C6   | H20B <sup>6</sup>  | 2.853    | C6   | H43B <sup>6</sup>  | 3.380    |
| C7   | H20B <sup>6</sup>  | 3.336    | C7   | H43B <sup>6</sup>  | 3.059    |
| C7   | H43C <sup>6</sup>  | 3.340    | C7   | H47A <sup>6</sup>  | 3.258    |
| C8   | H16C <sup>5</sup>  | 3.136    | C8   | H20A <sup>6</sup>  | 3.151    |
| C8   | H20B <sup>6</sup>  | 2.928    | C8   | H29A <sup>6</sup>  | 3.467    |
| C8   | H29B <sup>6</sup>  | 3.559    | C8   | H36A <sup>5</sup>  | 3.145    |
| C8   | H43B <sup>6</sup>  | 3.348    | C9   | H27B <sup>6</sup>  | 3.527    |
| C9   | H44B <sup>4</sup>  | 3.331    | C9   | H45C <sup>4</sup>  | 3.085    |
| C10  | H46C <sup>7</sup>  | 3.587    | C14  | H46A <sup>7</sup>  | 3.161    |
| C15  | H28B <sup>6</sup>  | 3.560    | C15  | H46C <sup>7</sup>  | 3.413    |
| C15  | H47A <sup>6</sup>  | 3.572    | C15  | H47B <sup>6</sup>  | 3.125    |
| C16  | H8A <sup>7</sup>   | 3.445    | C16  | H28C <sup>7</sup>  | 3.534    |
| C17  | H43A <sup>2</sup>  | 3.473    | C17  | H44A <sup>2</sup>  | 3.048    |
| C18  | H27A <sup>8</sup>  | 3.099    | C18  | H45A <sup>7</sup>  | 3.578    |
| C19  | H18A <sup>9</sup>  | 3.299    | C19  | H27A <sup>6</sup>  | 3.597    |
| C19  | H27B <sup>6</sup>  | 3.416    | C19  | H45A <sup>4</sup>  | 3.393    |
| C19  | H45C <sup>4</sup>  | 3.299    | C19  | H46A <sup>7</sup>  | 2.835    |
| C20  | H5 <sup>1</sup>    | 3.589    | C20  | H8C <sup>1</sup>   | 2.803    |
| C23  | H15A <sup>1</sup>  | 3.123    | C24  | H15A <sup>1</sup>  | 2.940    |
| C24  | H19B <sup>1</sup>  | 3.560    | C24  | H36C <sup>5</sup>  | 3.349    |
| C24  | H46B <sup>10</sup> | 3.380    | C25  | H9B <sup>1</sup>   | 3.578    |
| C25  | H15A <sup>1</sup>  | 3.293    | C26  | H9B <sup>1</sup>   | 3.293    |
| C27  | H9B <sup>1</sup>   | 3.459    | C27  | H18C <sup>11</sup> | 3.259    |
| C27  | H19B <sup>1</sup>  | 3.492    | C27  | H19C <sup>1</sup>  | 3.360    |
| C28  | H15B <sup>5</sup>  | 3.074    | C28  | H16C <sup>5</sup>  | 3.446    |
| C28  | H28B <sup>10</sup> | 3.165    | C29  | H8C <sup>1</sup>   | 3.116    |
| C29  | H17A <sup>2</sup>  | 3.384    | C30  | H17A <sup>2</sup>  | 3.165    |
| C30  | H47C <sup>6</sup>  | 3.436    | C31  | H43C <sup>6</sup>  | 2.941    |
| C32  | H43C <sup>6</sup>  | 3.007    | C33  | H47C <sup>6</sup>  | 3.135    |

Table S8-12. Intermolecular contacts less than 3.60 Å involving hydrogens (continued)

| atom | atom               | distance | atom | atom               | distance |
|------|--------------------|----------|------|--------------------|----------|
| C34  | H47C <sup>6</sup>  | 2.827    | C35  | H17A <sup>2</sup>  | 3.100    |
| C35  | H47C <sup>6</sup>  | 2.994    | C36  | H8B <sup>7</sup>   | 3.154    |
| C36  | H24 <sup>7</sup>   | 3.299    | C36  | H46B <sup>6</sup>  | 3.213    |
| C36  | H47C <sup>6</sup>  | 3.367    | C37  | H43C <sup>6</sup>  | 3.107    |
| C38  | H37B <sup>1</sup>  | 2.812    | C39  | H37B <sup>1</sup>  | 3.517    |
| C40  | H33 <sup>1</sup>   | 3.539    | C41  | H33 <sup>1</sup>   | 3.590    |
| C41  | H37B <sup>1</sup>  | 3.568    | C42  | H37B <sup>1</sup>  | 2.895    |
| C43  | H7 <sup>1</sup>    | 3.029    | C43  | H8A <sup>1</sup>   | 3.424    |
| C43  | H37A <sup>1</sup>  | 3.536    | C43  | H37B <sup>1</sup>  | 3.178    |
| C44  | H9C <sup>12</sup>  | 3.420    | C44  | H17B <sup>2</sup>  | 3.118    |
| C44  | H37B <sup>1</sup>  | 3.045    | C45  | H9A <sup>12</sup>  | 3.417    |
| C45  | H19A <sup>12</sup> | 3.209    | C45  | H19C <sup>12</sup> | 3.405    |
| C46  | H19B <sup>5</sup>  | 2.774    | C46  | H24 <sup>10</sup>  | 3.192    |
| C46  | H28B <sup>10</sup> | 3.528    | C46  | H36C <sup>1</sup>  | 3.246    |
| C47  | H1A <sup>1</sup>   | 3.028    | C47  | H15B <sup>1</sup>  | 3.316    |
| C47  | H15C <sup>1</sup>  | 3.169    | H1A  | C47 <sup>6</sup>   | 3.028    |
| H1A  | H47A <sup>6</sup>  | 2.410    | H1A  | H47B <sup>6</sup>  | 3.462    |
| H1A  | H47C <sup>6</sup>  | 2.846    | H5   | Cl1 <sup>6</sup>   | 3.512    |
| H5   | C20 <sup>6</sup>   | 3.589    | H5   | H20A <sup>6</sup>  | 2.894    |
| H5   | H20B <sup>6</sup>  | 3.524    | H5   | H26 <sup>6</sup>   | 3.245    |
| H5   | H36A <sup>5</sup>  | 3.533    | H7   | C43 <sup>6</sup>   | 3.029    |
| H7   | H20B <sup>6</sup>  | 3.521    | H7   | H43A <sup>6</sup>  | 3.525    |
| H7   | H43B <sup>6</sup>  | 2.634    | H7   | H43C <sup>6</sup>  | 2.584    |
| H7   | H47A <sup>6</sup>  | 3.096    | H8A  | C16 <sup>5</sup>   | 3.445    |
| H8A  | C43 <sup>6</sup>   | 3.424    | H8A  | H16A <sup>5</sup>  | 3.319    |
| H8A  | H16C <sup>5</sup>  | 2.735    | H8A  | H20B <sup>6</sup>  | 3.157    |
| H8A  | H29A <sup>6</sup>  | 3.281    | H8A  | H43A <sup>6</sup>  | 3.354    |
| H8A  | H43B <sup>6</sup>  | 2.912    | H8A  | H43C <sup>6</sup>  | 3.471    |
| H8B  | C36 <sup>5</sup>   | 3.154    | H8B  | H16C <sup>5</sup>  | 2.927    |
| H8B  | H36A <sup>5</sup>  | 2.304    | H8B  | H36C <sup>5</sup>  | 3.262    |
| H8C  | N1 <sup>6</sup>    | 3.492    | H8C  | C20 <sup>6</sup>   | 2.803    |
| H8C  | C29 <sup>6</sup>   | 3.116    | H8C  | H16A <sup>5</sup>  | 3.405    |
| H8C  | H16C <sup>5</sup>  | 3.241    | H8C  | H20A <sup>6</sup>  | 2.393    |
| H8C  | H20B <sup>6</sup>  | 2.399    | H8C  | H29A <sup>6</sup>  | 2.833    |
| H8C  | H29B <sup>6</sup>  | 2.690    | H8C  | H36A <sup>5</sup>  | 3.221    |
| H8C  | H43B <sup>6</sup>  | 3.300    | H9A  | C45 <sup>4</sup>   | 3.417    |
| H9A  | H44B <sup>4</sup>  | 3.332    | H9A  | H45C <sup>4</sup>  | 2.505    |

Table S8-12. Intermolecular contacts less than 3.60 Å involving hydrogens (continued)

| atom | atom              | distance | atom | atom              | distance |
|------|-------------------|----------|------|-------------------|----------|
| H9B  | C25 <sup>6</sup>  | 3.578    | H9B  | C26 <sup>6</sup>  | 3.293    |
| H9B  | C27 <sup>6</sup>  | 3.459    | H9B  | H26 <sup>6</sup>  | 2.839    |
| H9B  | H27B <sup>6</sup> | 2.667    | H9B  | H45B <sup>4</sup> | 3.547    |
| H9B  | H45C <sup>4</sup> | 3.094    | H9C  | C44 <sup>4</sup>  | 3.420    |
| H9C  | H44B <sup>4</sup> | 2.595    | H9C  | H44C <sup>4</sup> | 3.440    |
| H9C  | H45C <sup>4</sup> | 3.182    | H15A | C23 <sup>6</sup>  | 3.123    |
| H15A | C24 <sup>6</sup>  | 2.940    | H15A | C25 <sup>6</sup>  | 3.293    |
| H15A | H24 <sup>6</sup>  | 3.145    | H15A | H28B <sup>6</sup> | 3.312    |
| H15A | H46C <sup>7</sup> | 3.272    | H15A | H47B <sup>6</sup> | 3.320    |
| H15B | C28 <sup>7</sup>  | 3.074    | H15B | C47 <sup>6</sup>  | 3.316    |
| H15B | H28A <sup>7</sup> | 2.958    | H15B | H28B <sup>7</sup> | 2.934    |
| H15B | H28B <sup>6</sup> | 2.929    | H15B | H28C <sup>7</sup> | 2.806    |
| H15B | H46C <sup>7</sup> | 2.971    | H15B | H47A <sup>6</sup> | 3.490    |
| H15B | H47B <sup>6</sup> | 2.715    | H15B | H47C <sup>6</sup> | 3.255    |
| H15C | C47 <sup>6</sup>  | 3.169    | H15C | H47A <sup>6</sup> | 2.890    |
| H15C | H47B <sup>6</sup> | 2.855    | H15C | H47C <sup>6</sup> | 3.243    |
| H16A | H8A <sup>7</sup>  | 3.319    | H16A | H8C <sup>7</sup>  | 3.405    |
| H16A | H29A <sup>2</sup> | 3.436    | H16A | H29B <sup>2</sup> | 3.020    |
| H16A | H35 <sup>2</sup>  | 3.356    | H16C | C8 <sup>7</sup>   | 3.136    |
| H16C | C28 <sup>7</sup>  | 3.446    | H16C | H8A <sup>7</sup>  | 2.735    |
| H16C | H8B <sup>7</sup>  | 2.927    | H16C | H8C <sup>7</sup>  | 3.241    |
| H16C | H28A <sup>7</sup> | 3.485    | H16C | H28C <sup>7</sup> | 2.612    |
| H17A | C29 <sup>2</sup>  | 3.384    | H17A | C30 <sup>2</sup>  | 3.165    |
| H17A | C35 <sup>2</sup>  | 3.100    | H17A | H29A <sup>2</sup> | 3.074    |
| H17A | H29B <sup>2</sup> | 3.311    | H17A | H35 <sup>2</sup>  | 3.116    |
| H17A | H43A <sup>2</sup> | 3.337    | H17A | H44A <sup>2</sup> | 3.252    |
| H17B | C13 <sup>7</sup>  | 3.476    | H17B | C44 <sup>2</sup>  | 3.118    |
| H17B | H43A <sup>2</sup> | 2.772    | H17B | H44A <sup>2</sup> | 2.219    |
| H17B | H44B <sup>2</sup> | 3.456    | H17B | H44C <sup>2</sup> | 3.389    |
| H17C | H44A <sup>2</sup> | 3.322    | H18A | C19 <sup>9</sup>  | 3.299    |
| H18A | H19A <sup>9</sup> | 2.829    | H18A | H19B <sup>9</sup> | 2.946    |
| H18A | H27A <sup>8</sup> | 3.081    | H18A | H45A <sup>7</sup> | 3.325    |
| H18A | H45A <sup>4</sup> | 3.466    | H18A | H46A <sup>4</sup> | 3.424    |
| H18B | H27A <sup>8</sup> | 3.038    | H18C | C27 <sup>8</sup>  | 3.259    |
| H18C | H27A <sup>8</sup> | 2.669    | H18C | H27B <sup>8</sup> | 3.156    |
| H18C | H27C <sup>8</sup> | 3.476    | H18C | H45A <sup>7</sup> | 3.190    |
| H18C | H45B <sup>7</sup> | 3.320    | H19A | C45 <sup>4</sup>  | 3.209    |

Table S8-12. Intermolecular contacts less than 3.60 Å involving hydrogens (continued)

| atom | atom               | distance | atom | atom               | distance |
|------|--------------------|----------|------|--------------------|----------|
| H19A | H18A <sup>9</sup>  | 2.829    | H19A | H19A <sup>9</sup>  | 2.831    |
| H19A | H45A <sup>7</sup>  | 3.405    | H19A | H45A <sup>4</sup>  | 2.666    |
| H19A | H45C <sup>4</sup>  | 2.913    | H19A | H46A <sup>7</sup>  | 3.142    |
| H19B | C24 <sup>6</sup>   | 3.560    | H19B | C27 <sup>6</sup>   | 3.492    |
| H19B | C46 <sup>7</sup>   | 2.774    | H19B | H18A <sup>9</sup>  | 2.946    |
| H19B | H24 <sup>6</sup>   | 3.187    | H19B | H27A <sup>6</sup>  | 3.076    |
| H19B | H27B <sup>6</sup>  | 3.297    | H19B | H45A <sup>7</sup>  | 3.258    |
| H19B | H46A <sup>7</sup>  | 2.053    | H19B | H46B <sup>7</sup>  | 2.923    |
| H19B | H46C <sup>7</sup>  | 2.965    | H19C | C27 <sup>6</sup>   | 3.360    |
| H19C | C45 <sup>4</sup>   | 3.405    | H19C | H27A <sup>6</sup>  | 3.343    |
| H19C | H27B <sup>6</sup>  | 2.785    | H19C | H45A <sup>4</sup>  | 3.273    |
| H19C | H45C <sup>4</sup>  | 2.812    | H20A | C5 <sup>1</sup>    | 3.118    |
| H20A | C6 <sup>1</sup>    | 3.183    | H20A | C8 <sup>1</sup>    | 3.151    |
| H20A | H5 <sup>1</sup>    | 2.894    | H20A | H8C <sup>1</sup>   | 2.393    |
| H20B | C5 <sup>1</sup>    | 3.329    | H20B | C6 <sup>1</sup>    | 2.853    |
| H20B | C7 <sup>1</sup>    | 3.336    | H20B | C8 <sup>1</sup>    | 2.928    |
| H20B | H5 <sup>1</sup>    | 3.524    | H20B | H7 <sup>1</sup>    | 3.521    |
| H20B | H8A <sup>1</sup>   | 3.157    | H20B | H8C <sup>1</sup>   | 2.399    |
| H24  | C36 <sup>5</sup>   | 3.299    | H24  | C46 <sup>10</sup>  | 3.192    |
| H24  | H15A <sup>1</sup>  | 3.145    | H24  | H19B <sup>1</sup>  | 3.187    |
| H24  | H36A <sup>5</sup>  | 3.330    | H24  | H36C <sup>5</sup>  | 2.522    |
| H24  | H46A <sup>10</sup> | 3.434    | H24  | H46B <sup>10</sup> | 2.518    |
| H24  | H46C <sup>10</sup> | 3.181    | H26  | C5 <sup>1</sup>    | 3.496    |
| H26  | H5 <sup>1</sup>    | 3.245    | H26  | H9B <sup>1</sup>   | 2.839    |
| H27A | C18 <sup>11</sup>  | 3.099    | H27A | C19 <sup>1</sup>   | 3.597    |
| H27A | H18A <sup>11</sup> | 3.081    | H27A | H18B <sup>11</sup> | 3.038    |
| H27A | H18C <sup>11</sup> | 2.669    | H27A | H19B <sup>1</sup>  | 3.076    |
| H27A | H19C <sup>1</sup>  | 3.343    | H27A | H36C <sup>5</sup>  | 3.505    |
| H27B | C9 <sup>1</sup>    | 3.527    | H27B | C19 <sup>1</sup>   | 3.416    |
| H27B | H9B <sup>1</sup>   | 2.667    | H27B | H18C <sup>11</sup> | 3.156    |
| H27B | H19B <sup>1</sup>  | 3.297    | H27B | H19C <sup>1</sup>  | 2.785    |
| H27B | H45B <sup>3</sup>  | 3.301    | H27C | H18C <sup>11</sup> | 3.476    |
| H28A | H15B <sup>5</sup>  | 2.958    | H28A | H16C <sup>5</sup>  | 3.485    |
| H28A | H28B <sup>10</sup> | 3.163    | H28B | C15 <sup>1</sup>   | 3.560    |
| H28B | C28 <sup>10</sup>  | 3.165    | H28B | C46 <sup>10</sup>  | 3.528    |
| H28B | H15A <sup>1</sup>  | 3.312    | H28B | H15B <sup>5</sup>  | 2.934    |
| H28B | H15B <sup>1</sup>  | 2.929    | H28B | H28A <sup>10</sup> | 3.163    |



Table S8-12. Intermolecular contacts less than 3.60 Å involving hydrogens (continued)

| atom | atom               | distance | atom | atom               | distance |
|------|--------------------|----------|------|--------------------|----------|
| H28B | H28B <sup>10</sup> | 2.375    | H28B | H46B <sup>10</sup> | 3.323    |
| H28B | H46C <sup>10</sup> | 2.854    | H28B | H47B <sup>10</sup> | 3.339    |
| H28C | C16 <sup>5</sup>   | 3.534    | H28C | H15B <sup>5</sup>  | 2.806    |
| H28C | H16C <sup>5</sup>  | 2.612    | H28C | H36A <sup>5</sup>  | 3.445    |
| H28C | H36C <sup>5</sup>  | 3.454    | H28C | H47C <sup>10</sup> | 3.556    |
| H29A | C8 <sup>1</sup>    | 3.467    | H29A | H8A <sup>1</sup>   | 3.281    |
| H29A | H8C <sup>1</sup>   | 2.833    | H29A | H16A <sup>2</sup>  | 3.436    |
| H29A | H17A <sup>2</sup>  | 3.074    | H29B | C8 <sup>1</sup>    | 3.559    |
| H29B | H8C <sup>1</sup>   | 2.690    | H29B | H16A <sup>2</sup>  | 3.020    |
| H29B | H17A <sup>2</sup>  | 3.311    | H33  | Cl2 <sup>13</sup>  | 2.928    |
| H33  | C40 <sup>6</sup>   | 3.539    | H33  | C41 <sup>6</sup>   | 3.590    |
| H33  | H46B <sup>6</sup>  | 3.361    | H33  | H47C <sup>6</sup>  | 3.536    |
| H35  | H16A <sup>2</sup>  | 3.356    | H35  | H17A <sup>2</sup>  | 3.116    |
| H35  | H47C <sup>6</sup>  | 3.346    | H36A | Cl1 <sup>2</sup>   | 3.512    |
| H36A | C8 <sup>7</sup>    | 3.145    | H36A | H5 <sup>7</sup>    | 3.533    |
| H36A | H8B <sup>7</sup>   | 2.304    | H36A | H8C <sup>7</sup>   | 3.221    |
| H36A | H24 <sup>7</sup>   | 3.330    | H36A | H28C <sup>7</sup>  | 3.445    |
| H36C | C24 <sup>7</sup>   | 3.349    | H36C | C46 <sup>6</sup>   | 3.246    |
| H36C | H8B <sup>7</sup>   | 3.262    | H36C | H24 <sup>7</sup>   | 2.522    |
| H36C | H27A <sup>7</sup>  | 3.505    | H36C | H28C <sup>7</sup>  | 3.454    |
| H36C | H46B <sup>6</sup>  | 2.300    | H36C | H47C <sup>6</sup>  | 3.037    |
| H37A | C43 <sup>6</sup>   | 3.536    | H37A | H43A <sup>6</sup>  | 3.461    |
| H37A | H43C <sup>6</sup>  | 2.943    | H37B | C38 <sup>6</sup>   | 2.812    |
| H37B | C39 <sup>6</sup>   | 3.517    | H37B | C41 <sup>6</sup>   | 3.568    |
| H37B | C42 <sup>6</sup>   | 2.895    | H37B | C43 <sup>6</sup>   | 3.178    |
| H37B | C44 <sup>6</sup>   | 3.045    | H37B | H43A <sup>6</sup>  | 3.203    |
| H37B | H43C <sup>6</sup>  | 2.891    | H37B | H44A <sup>6</sup>  | 3.069    |
| H37B | H44B <sup>6</sup>  | 2.749    | H37C | Cl2 <sup>13</sup>  | 3.518    |
| H43A | Cl3 <sup>1</sup>   | 3.212    | H43A | C17 <sup>2</sup>   | 3.473    |
| H43A | H7 <sup>1</sup>    | 3.525    | H43A | H8A <sup>1</sup>   | 3.354    |
| H43A | H17A <sup>2</sup>  | 3.337    | H43A | H17B <sup>2</sup>  | 2.772    |
| H43A | H37A <sup>1</sup>  | 3.461    | H43A | H37B <sup>1</sup>  | 3.203    |
| H43B | C6 <sup>1</sup>    | 3.380    | H43B | C7 <sup>1</sup>    | 3.059    |
| H43B | C8 <sup>1</sup>    | 3.348    | H43B | H7 <sup>1</sup>    | 2.634    |
| H43B | H8A <sup>1</sup>   | 2.912    | H43B | H8C <sup>1</sup>   | 3.300    |
| H43C | Cl3 <sup>1</sup>   | 3.265    | H43C | O3 <sup>1</sup>    | 2.859    |
| H43C | C7 <sup>1</sup>    | 3.340    | H43C | C31 <sup>1</sup>   | 2.941    |

Table S8-12. Intermolecular contacts less than 3.60 Å involving hydrogens (continued)

| atom | atom               | distance | atom | atom               | distance |
|------|--------------------|----------|------|--------------------|----------|
| H43C | C32 <sup>1</sup>   | 3.007    | H43C | C37 <sup>1</sup>   | 3.107    |
| H43C | H7 <sup>1</sup>    | 2.584    | H43C | H8A <sup>1</sup>   | 3.471    |
| H43C | H37A <sup>1</sup>  | 2.943    | H43C | H37B <sup>1</sup>  | 2.891    |
| H44A | C17 <sup>2</sup>   | 3.048    | H44A | H17A <sup>2</sup>  | 3.252    |
| H44A | H17B <sup>2</sup>  | 2.219    | H44A | H17C <sup>2</sup>  | 3.322    |
| H44A | H37B <sup>1</sup>  | 3.069    | H44B | C9 <sup>12</sup>   | 3.331    |
| H44B | H9A <sup>12</sup>  | 3.332    | H44B | H9C <sup>12</sup>  | 2.595    |
| H44B | H17B <sup>2</sup>  | 3.456    | H44B | H37B <sup>1</sup>  | 2.749    |
| H44C | H9C <sup>12</sup>  | 3.440    | H44C | H17B <sup>2</sup>  | 3.389    |
| H45A | C18 <sup>5</sup>   | 3.578    | H45A | C19 <sup>12</sup>  | 3.393    |
| H45A | H18A <sup>5</sup>  | 3.325    | H45A | H18A <sup>12</sup> | 3.466    |
| H45A | H18C <sup>5</sup>  | 3.190    | H45A | H19A <sup>5</sup>  | 3.405    |
| H45A | H19A <sup>12</sup> | 2.666    | H45A | H19B <sup>5</sup>  | 3.258    |
| H45A | H19C <sup>12</sup> | 3.273    | H45B | H9B <sup>12</sup>  | 3.547    |
| H45B | H18C <sup>5</sup>  | 3.320    | H45B | H27B <sup>13</sup> | 3.301    |
| H45C | C12 <sup>12</sup>  | 3.036    | H45C | C9 <sup>12</sup>   | 3.085    |
| H45C | C19 <sup>12</sup>  | 3.299    | H45C | H9A <sup>12</sup>  | 2.505    |
| H45C | H9B <sup>12</sup>  | 3.094    | H45C | H9C <sup>12</sup>  | 3.182    |
| H45C | H19A <sup>12</sup> | 2.913    | H45C | H19C <sup>12</sup> | 2.812    |
| H46A | C14 <sup>5</sup>   | 3.161    | H46A | C19 <sup>5</sup>   | 2.835    |
| H46A | H18A <sup>12</sup> | 3.424    | H46A | H19A <sup>5</sup>  | 3.142    |
| H46A | H19B <sup>5</sup>  | 2.053    | H46A | H24 <sup>10</sup>  | 3.434    |
| H46B | C24 <sup>10</sup>  | 3.380    | H46B | C36 <sup>1</sup>   | 3.213    |
| H46B | H19B <sup>5</sup>  | 2.923    | H46B | H24 <sup>10</sup>  | 2.518    |
| H46B | H28B <sup>10</sup> | 3.323    | H46B | H33 <sup>1</sup>   | 3.361    |
| H46B | H36C <sup>1</sup>  | 2.300    | H46C | C10 <sup>5</sup>   | 3.587    |
| H46C | C15 <sup>5</sup>   | 3.413    | H46C | H15A <sup>5</sup>  | 3.272    |
| H46C | H15B <sup>5</sup>  | 2.971    | H46C | H19B <sup>5</sup>  | 2.965    |
| H46C | H24 <sup>10</sup>  | 3.181    | H46C | H28B <sup>10</sup> | 2.854    |
| H47A | C1 <sup>1</sup>    | 3.173    | H47A | C2 <sup>1</sup>    | 3.239    |
| H47A | C7 <sup>1</sup>    | 3.258    | H47A | C15 <sup>1</sup>   | 3.572    |
| H47A | H1A <sup>1</sup>   | 2.410    | H47A | H7 <sup>1</sup>    | 3.096    |
| H47A | H15B <sup>1</sup>  | 3.490    | H47A | H15C <sup>1</sup>  | 2.890    |
| H47B | C15 <sup>1</sup>   | 3.125    | H47B | H1A <sup>1</sup>   | 3.462    |
| H47B | H15A <sup>1</sup>  | 3.320    | H47B | H15B <sup>1</sup>  | 2.715    |
| H47B | H15C <sup>1</sup>  | 2.855    | H47B | H28B <sup>10</sup> | 3.339    |
| H47C | C30 <sup>1</sup>   | 3.436    | H47C | C33 <sup>1</sup>   | 3.135    |

Table S8-12. Intermolecular contacts less than 3.60 Å involving hydrogens (continued)

| atom | atom               | distance | atom | atom              | distance |
|------|--------------------|----------|------|-------------------|----------|
| H47C | C34 <sup>1</sup>   | 2.827    | H47C | C35 <sup>1</sup>  | 2.994    |
| H47C | C36 <sup>1</sup>   | 3.367    | H47C | H1A <sup>1</sup>  | 2.846    |
| H47C | H15B <sup>1</sup>  | 3.255    | H47C | H15C <sup>1</sup> | 3.243    |
| H47C | H28C <sup>10</sup> | 3.556    | H47C | H33 <sup>1</sup>  | 3.536    |
| H47C | H35 <sup>1</sup>   | 3.346    | H47C | H36C <sup>1</sup> | 3.037    |

Symmetry Operators:

- |                         |                     |
|-------------------------|---------------------|
| (1) X,-Y+1,Z+1          | (2) -X+1,-Y+1,-Z+1  |
| (3) X-1,Y,Z             | (4) X-1,-Y+1,Z      |
| (5) -X+1,Y+1/2-1,-Z+1/2 | (6) X,-Y+1,Z        |
| (7) -X+1,Y+1/2,-Z+1/2   | (8) -X,Y+1/2,-Z+1/2 |
| (9) -X,-Y+1,-Z          | (10) -X+1,-Y,-Z+1   |
| (11) -X,Y+1/2-1,-Z+1/2  | (12) X+1,-Y+1,Z+1   |
| (13) X+1,Y,Z            |                     |

X-ray Structure Report

for

$[(1,2,4\text{-Me}_3\text{C}_5\text{H}_2)\text{TiCl}_2\{(\text{O}-2,4\text{-Me}_2\text{C}_6\text{H}_2)\text{-6-CH}_2\}][(\text{O}-2,4\text{-Me}_2\text{C}_6\text{H}_2)\text{-6-CH}_2\}_2\text{N}$  (**3**)

March 15, 2016

## Experimental

### Data Collection

A red block crystal of  $C_{43}H_{52}Cl_3NO_3Ti_2$  having approximate dimensions of 0.200 x 0.180 x 0.130 mm was mounted on a glass fiber. All measurements were made on a Rigaku XtaLAB mini diffractometer using multi-layer mirror monochromated Mo- $K\alpha$  radiation.

The crystal-to-detector distance was 50.00 mm.

Cell constants and an orientation matrix for data collection corresponded to a primitive monoclinic cell with dimensions:

$$\begin{aligned} a &= 16.6846(7) \text{ \AA} \\ b &= 18.4587(6) \text{ \AA} & \beta &= 114.144(5)^\circ \\ c &= 14.6183(7) \text{ \AA} \\ V &= 4108.2(3) \text{ \AA}^3 \end{aligned}$$

For  $Z = 4$  and F.W. = 833.05, the calculated density is 1.347 g/cm<sup>3</sup>. The reflection conditions of:

$$\begin{aligned} h0l: & l = 2n \\ 0k0: & k = 2n \end{aligned}$$

uniquely determine the space group to be:

$$P2_1/c \text{ (\#14)}$$

The data were collected at a temperature of  $-180 \pm 1^\circ\text{C}$  to a maximum  $2\theta$  value of  $65.2^\circ$ . A total of 540 oscillation images were collected. A sweep of data was done using  $\omega$  scans from  $-60.0$  to  $120.0^\circ$  in  $1.00^\circ$  step, at  $\chi=54.0^\circ$  and  $\phi = 0.0^\circ$ . The exposure rate was 16.0 [sec./ $^\circ$ ]. The detector swing angle was  $30.00^\circ$ . A second sweep was performed using  $\omega$  scans from  $-60.0$  to  $120.0^\circ$  in  $1.00^\circ$  step, at  $\chi=54.0^\circ$  and  $\phi = 120.0^\circ$ . The exposure rate was 16.0 [sec./ $^\circ$ ]. The detector swing angle was  $30.00^\circ$ . Another sweep was performed using  $\omega$  scans from  $-60.0$  to  $120.0^\circ$  in  $1.00^\circ$  step, at  $\chi=54.0^\circ$  and  $\phi = 240.0^\circ$ . The exposure rate was 16.0 [sec./ $^\circ$ ]. The detector swing angle

was 30.00°. The crystal-to-detector distance was 50.00 mm. Readout was performed in the 0.073 mm pixel mode.

### Data Reduction

Of the 0 reflections were collected, where 0 were unique ( $R_{\text{int}} = 0.0777$ ); equivalent reflections were merged. Data were collected and processed using CrysAlisPro (Rigaku Oxford Diffraction).<sup>1</sup>

The linear absorption coefficient,  $\mu$ , for Mo-K $\alpha$  radiation is 6.228 cm<sup>-1</sup>. An empirical absorption correction was applied which resulted in transmission factors ranging from 0.890 to 0.922. The data were corrected for Lorentz and polarization effects.

### Structure Solution and Refinement

The structure was solved by direct methods<sup>2</sup> and expanded using Fourier techniques. The non-hydrogen atoms were refined anisotropically. Hydrogen atoms were refined using the riding model. The final cycle of full-matrix least-squares refinement<sup>3</sup> on  $F^2$  was based on 9423 observed reflections and 469 variable parameters and converged (largest parameter shift was 0.00 times its esd) with unweighted and weighted agreement factors of:

$$R1 = \sum ||F_o| - |F_c|| / \sum |F_o| = 0.0553$$

$$wR2 = [ \sum ( w (F_o^2 - F_c^2)^2 ) / \sum w(F_o^2)^2 ]^{1/2} = 0.1477$$

The goodness of fit<sup>4</sup> was 1.04. Unit weights were used. The maximum and minimum peaks on the final difference Fourier map corresponded to 0.69 and -0.69 e<sup>-</sup>/Å<sup>3</sup>, respectively.

Neutral atom scattering factors were taken from International Tables for Crystallography (IT), Vol. C, Table 6.1.1.4<sup>5</sup>. Anomalous dispersion effects were included in  $F_{\text{calc}}$ <sup>6</sup>; the values for  $\Delta f'$  and  $\Delta f''$  were those of Creagh and McAuley<sup>7</sup>. The values for the mass attenuation coefficients are those of Creagh and Hubbell<sup>8</sup>. All calculations were performed using the CrystalStructure<sup>9</sup> crystallographic software package except for refinement, which was performed using SHELXL Version 2014/7<sup>10</sup>.

## References

(1) CrysAlisPro: Data Collection and Processing Software, Rigaku Corporation (2015). Tokyo 196-8666, Japan.

(2) SIR92: Altomare, A., Cascarano, G., Giacovazzo, C. and Guagliardi, A. (1993). J. Appl. Cryst. 26, 343-350.

(3) Least Squares function minimized: (SHELXL Version 2014/7)

$$\sum w(F_o^2 - F_c^2)^2 \quad \text{where } w = \text{Least Squares weights.}$$

(4) Goodness of fit is defined as:

$$[\sum w(F_o^2 - F_c^2)^2 / (N_o - N_v)]^{1/2}$$

where:  $N_o$  = number of observations  
 $N_v$  = number of variables

(5) International Tables for Crystallography, Vol.C (1992). Ed. A.J.C. Wilson, Kluwer Academic Publishers, Dordrecht, Netherlands, Table 6.1.1.4, pp. 572.

(6) Ibers, J. A. & Hamilton, W. C.; Acta Crystallogr., 17, 781 (1964).

(7) Creagh, D. C. & McAuley, W.J. ; "International Tables for Crystallography", Vol C, (A.J.C. Wilson, ed.), Kluwer Academic Publishers, Boston, Table 4.2.6.8, pages 219-222 (1992).

(8) Creagh, D. C. & Hubbell, J.H.; "International Tables for Crystallography", Vol C, (A.J.C. Wilson, ed.), Kluwer Academic Publishers, Boston, Table 4.2.4.3, pages 200-206 (1992).

(9) CrystalStructure 4.2: Crystal Structure Analysis Package, Rigaku Corporation (2000-2015). Tokyo 196-8666, Japan.

(10) SHELXL Version 2014/7: Sheldrick, G. M. (2008). Acta Cryst. A64, 112-122.

## EXPERIMENTAL DETAILS

### A. Crystal Data

|                         |                                                                                                                                                             |
|-------------------------|-------------------------------------------------------------------------------------------------------------------------------------------------------------|
| Empirical Formula       | $C_{43}H_{52}Cl_3NO_3Ti_2$                                                                                                                                  |
| Formula Weight          | 833.05                                                                                                                                                      |
| Crystal Color, Habit    | red, block                                                                                                                                                  |
| Crystal Dimensions      | 0.200 X 0.180 X 0.130 mm                                                                                                                                    |
| Crystal System          | monoclinic                                                                                                                                                  |
| Lattice Type            | Primitive                                                                                                                                                   |
| Lattice Parameters      | $a = 16.6846(7) \text{ \AA}$<br>$b = 18.4587(6) \text{ \AA}$<br>$c = 14.6183(7) \text{ \AA}$<br>$\beta = 114.144(5)^\circ$<br>$V = 4108.2(3) \text{ \AA}^3$ |
| Space Group             | $P2_1/c$ (#14)                                                                                                                                              |
| Z value                 | 4                                                                                                                                                           |
| $D_{\text{calc}}$       | $1.347 \text{ g/cm}^3$                                                                                                                                      |
| $F_{000}$               | 1744.00                                                                                                                                                     |
| $\mu(\text{MoK}\alpha)$ | $6.228 \text{ cm}^{-1}$                                                                                                                                     |



## B. Intensity Measurements

|                                                        |                                                                                      |
|--------------------------------------------------------|--------------------------------------------------------------------------------------|
| Diffractometer                                         | XtaLAB mini                                                                          |
| Radiation                                              | MoK $\alpha$ ( $\lambda = 0.71073 \text{ \AA}$ )<br>multi-layer mirror monochromated |
| Voltage, Current                                       | 50kV, 24mA                                                                           |
| Temperature                                            | -180.0 $^{\circ}$ C                                                                  |
| Detector Aperture                                      | 75.0 mm (diameter)                                                                   |
| Data Images                                            | 540 exposures                                                                        |
| $\omega$ oscillation Range ( $\chi=54.0, \phi=0.0$ )   | -60.0 - 120.0 $^{\circ}$                                                             |
| Exposure Rate                                          | 16.0 sec./ $^{\circ}$                                                                |
| Detector Swing Angle                                   | 30.00 $^{\circ}$                                                                     |
| $\omega$ oscillation Range ( $\chi=54.0, \phi=120.0$ ) | -60.0 - 120.0 $^{\circ}$                                                             |
| Exposure Rate                                          | 16.0 sec./ $^{\circ}$                                                                |
| Detector Swing Angle                                   | 30.00 $^{\circ}$                                                                     |
| $\omega$ oscillation Range ( $\chi=54.0, \phi=240.0$ ) | -60.0 - 120.0 $^{\circ}$                                                             |
| Exposure Rate                                          | 16.0 sec./ $^{\circ}$                                                                |
| Detector Swing Angle                                   | 30.00 $^{\circ}$                                                                     |
| Detector Position                                      | 50.00 mm                                                                             |
| Pixel Size                                             | 0.073 mm                                                                             |
| $2\theta_{\max}$                                       | 55.0 $^{\circ}$                                                                      |
| No. of Reflections Measured                            | Total: 43125                                                                         |

Corrections

Unique: 9423 ( $R_{\text{int}} = 0.0777$ )

Lorentz-polarization

Absorption

(trans. factors: 0.890 - 0.922)

### C. Structure Solution and Refinement

|                                       |                                                                                                                      |
|---------------------------------------|----------------------------------------------------------------------------------------------------------------------|
| Structure Solution                    | Direct Methods (SIR92)                                                                                               |
| Refinement                            | Full-matrix least-squares on F <sup>2</sup>                                                                          |
| Function Minimized                    | $\sum w (F_o^2 - F_c^2)^2$                                                                                           |
| Least Squares Weights                 | $w = 1 / [ \sigma^2(F_o^2) + (0.0622 \cdot P)^2 + 5.1378 \cdot P ]$<br>where $P = (\text{Max}(F_o^2, 0) + 2F_c^2)/3$ |
| 2 $\theta_{\text{max}}$ cutoff        | 55.0°                                                                                                                |
| Anomalous Dispersion                  | All non-hydrogen atoms                                                                                               |
| No. Observations (All reflections)    | 9423                                                                                                                 |
| No. Variables                         | 469                                                                                                                  |
| Reflection/Parameter Ratio            | 20.09                                                                                                                |
| Residuals: R1 ( $I > 2.00\sigma(I)$ ) | 0.0553                                                                                                               |
| Residuals: R (All reflections)        | 0.0898                                                                                                               |
| Residuals: wR2 (All reflections)      | 0.1477                                                                                                               |
| Goodness of Fit Indicator             | 1.037                                                                                                                |
| Max Shift/Error in Final Cycle        | 0.000                                                                                                                |
| Maximum peak in Final Diff. Map       | 0.69 e <sup>-</sup> /Å <sup>3</sup>                                                                                  |
| Minimum peak in Final Diff. Map       | -0.69 e <sup>-</sup> /Å <sup>3</sup>                                                                                 |

Table S9-1. Atomic coordinates and  $B_{\text{iso}}/B_{\text{eq}}$ 

| atom | x            | y           | z           | $B_{\text{eq}}$ |
|------|--------------|-------------|-------------|-----------------|
| Ti1  | -0.11264(4)  | 0.23007(3)  | 0.05337(4)  | 1.479(11)       |
| Ti2  | 0.37407(4)   | 0.34402(3)  | 0.46534(4)  | 1.353(11)       |
| Cl1  | -0.09709(6)  | 0.18626(5)  | 0.20484(6)  | 2.413(17)       |
| Cl2  | -0.21522(6)  | 0.31738(5)  | 0.02666(8)  | 3.17(2)         |
| Cl3  | 0.46139(5)   | 0.40871(5)  | 0.40655(7)  | 2.051(16)       |
| O1   | -0.01259(14) | 0.27779(12) | 0.08654(16) | 1.44(4)         |
| O2   | 0.38229(14)  | 0.25485(11) | 0.41971(17) | 1.59(4)         |
| O3   | 0.26650(14)  | 0.37709(12) | 0.38763(16) | 1.49(4)         |
| N1   | 0.19448(16)  | 0.23359(14) | 0.33259(19) | 1.26(4)         |
| C1   | 0.1521(2)    | 0.21622(17) | 0.2250(2)   | 1.50(5)         |
| C2   | 0.1444(2)    | 0.28167(17) | 0.1598(2)   | 1.42(5)         |
| C3   | 0.0635(2)    | 0.30902(17) | 0.0928(2)   | 1.31(5)         |
| C4   | 0.0573(2)    | 0.37177(17) | 0.0367(2)   | 1.48(5)         |
| C5   | 0.1345(2)    | 0.40685(18) | 0.0494(2)   | 1.73(6)         |
| C6   | 0.2167(2)    | 0.38191(19) | 0.1153(2)   | 1.73(6)         |
| C7   | 0.2197(2)    | 0.31894(18) | 0.1687(2)   | 1.58(5)         |
| C8   | 0.2992(2)    | 0.4224(2)   | 0.1280(3)   | 2.41(7)         |
| C9   | -0.0313(2)   | 0.40098(19) | -0.0318(3)  | 2.04(6)         |
| C10  | -0.1428(2)   | 0.10913(18) | -0.0008(2)  | 1.68(5)         |
| C11  | -0.0715(2)   | 0.13391(18) | -0.0204(2)  | 1.53(5)         |
| C12  | -0.1041(2)   | 0.19026(19) | -0.0920(2)  | 1.78(6)         |
| C13  | -0.1954(2)   | 0.19839(19) | -0.1183(3)  | 1.94(6)         |
| C14  | -0.2192(2)   | 0.14900(19) | -0.0596(3)  | 1.80(6)         |
| C15  | -0.3094(2)   | 0.1399(2)   | -0.0611(3)  | 2.30(6)         |
| C16  | -0.2558(2)   | 0.2487(2)   | -0.1962(3)  | 2.80(7)         |
| C17  | 0.0206(2)    | 0.10509(18) | 0.0239(3)   | 1.80(6)         |
| C18  | 0.2321(2)    | 0.16934(16) | 0.3932(2)   | 1.41(5)         |
| C19  | 0.3114(2)    | 0.13973(17) | 0.3820(2)   | 1.47(5)         |
| C20  | 0.3842(2)    | 0.18359(17) | 0.3980(2)   | 1.50(5)         |
| C21  | 0.4599(2)    | 0.15557(19) | 0.3924(3)   | 1.90(6)         |
| C22  | 0.4618(2)    | 0.0816(2)   | 0.3724(3)   | 2.28(6)         |
| C23  | 0.3917(2)    | 0.03623(19) | 0.3576(3)   | 2.21(6)         |
| C24  | 0.3170(2)    | 0.06654(18) | 0.3622(2)   | 1.81(6)         |
| C25  | 0.3960(3)    | -0.0439(2)  | 0.3384(3)   | 3.28(8)         |
| C26  | 0.5379(2)    | 0.2033(2)   | 0.4101(3)   | 2.75(7)         |
| C27  | 0.1358(2)    | 0.27123(17) | 0.3685(2)   | 1.45(5)         |
| C28  | 0.1140(2)    | 0.34778(17) | 0.3314(2)   | 1.30(5)         |

Table S9-1. Atomic coordinates and  $B_{\text{iso}}/B_{\text{eq}}$  (continued)

| atom | x          | y           | z         | $B_{\text{eq}}$ |
|------|------------|-------------|-----------|-----------------|
| C29  | 0.1806(2)  | 0.39804(17) | 0.3443(2) | 1.35(5)         |
| C30  | 0.1613(2)  | 0.46905(17) | 0.3109(2) | 1.53(5)         |
| C31  | 0.0737(2)  | 0.49055(18) | 0.2695(2) | 1.67(5)         |
| C32  | 0.0059(2)  | 0.44287(18) | 0.2578(2) | 1.58(5)         |
| C33  | 0.0276(2)  | 0.37157(18) | 0.2869(2) | 1.46(5)         |
| C34  | -0.0885(2) | 0.4680(2)   | 0.2155(3) | 2.22(6)         |
| C35  | 0.2346(2)  | 0.51986(18) | 0.3191(3) | 2.17(6)         |
| C36  | 0.3576(2)  | 0.31157(19) | 0.6098(3) | 2.01(6)         |
| C37  | 0.3450(2)  | 0.38742(19) | 0.6017(2) | 1.83(6)         |
| C38  | 0.4247(2)  | 0.41784(18) | 0.6099(3) | 1.79(6)         |
| C39  | 0.4879(2)  | 0.36202(19) | 0.6292(3) | 1.99(6)         |
| C40  | 0.4465(2)  | 0.29579(19) | 0.6296(3) | 2.11(6)         |
| C41  | 0.4875(3)  | 0.22155(19) | 0.6487(3) | 2.97(8)         |
| C42  | 0.5821(2)  | 0.3740(2)   | 0.6485(3) | 2.68(7)         |
| C43  | 0.2626(2)  | 0.4278(2)   | 0.5865(3) | 2.48(7)         |

$$B_{\text{eq}} = 8/3 \pi^2 (U_{11}(aa^*)^2 + U_{22}(bb^*)^2 + U_{33}(cc^*)^2 + 2U_{12}(aa^*bb^*)\cos \gamma + 2U_{13}(aa^*cc^*)\cos \beta + 2U_{23}(bb^*cc^*)\cos \alpha)$$

Table S9-2. Atomic coordinates and  $B_{\text{iso}}$  involving hydrogen atoms

| atom | x        | y        | z        | $B_{\text{iso}}$ |
|------|----------|----------|----------|------------------|
| H1A  | 0.09266  | 0.19653  | 0.20917  | 1.799            |
| H1B  | 0.18657  | 0.17827  | 0.20954  | 1.799            |
| H5   | 0.13128  | 0.44954  | 0.01179  | 2.077            |
| H7   | 0.27525  | 0.30066  | 0.21297  | 1.890            |
| H8A  | 0.28365  | 0.46505  | 0.08428  | 2.892            |
| H8B  | 0.32994  | 0.43773  | 0.19793  | 2.892            |
| H8C  | 0.33747  | 0.39058  | 0.10990  | 2.892            |
| H9A  | -0.07733 | 0.36860  | -0.03056 | 2.453            |
| H9B  | -0.03921 | 0.44934  | -0.00916 | 2.453            |
| H9C  | -0.03486 | 0.40401  | -0.10033 | 2.453            |
| H10  | -0.14097 | 0.06700  | 0.04304  | 2.013            |
| H12  | -0.07049 | 0.21470  | -0.12626 | 2.139            |
| H15A | -0.30783 | 0.10212  | -0.01334 | 2.761            |
| H15B | -0.32823 | 0.18577  | -0.04228 | 2.761            |
| H15C | -0.35089 | 0.12605  | -0.12863 | 2.761            |
| H16A | -0.22219 | 0.27686  | -0.22534 | 3.357            |
| H16B | -0.30115 | 0.22059  | -0.24900 | 3.357            |
| H16C | -0.28356 | 0.28170  | -0.16532 | 3.357            |
| H17A | 0.05664  | 0.13236  | -0.00294 | 2.156            |
| H17B | 0.04522  | 0.11032  | 0.09693  | 2.156            |
| H17C | 0.02019  | 0.05378  | 0.00645  | 2.156            |
| H18A | 0.18653  | 0.13109  | 0.37449  | 1.697            |
| H18B | 0.24849  | 0.18146  | 0.46459  | 1.697            |
| H22  | 0.51306  | 0.06188  | 0.36881  | 2.740            |
| H24  | 0.26802  | 0.03612  | 0.35145  | 2.169            |
| H25A | 0.34045  | -0.06687 | 0.32984  | 3.934            |
| H25B | 0.40611  | -0.05071 | 0.27749  | 3.934            |
| H25C | 0.44425  | -0.06594 | 0.39548  | 3.934            |
| H26A | 0.58451  | 0.17461  | 0.40315  | 3.299            |
| H26B | 0.52051  | 0.24268  | 0.36084  | 3.299            |
| H26C | 0.55945  | 0.22369  | 0.47783  | 3.299            |
| H27A | 0.16338  | 0.27188  | 0.44273  | 1.735            |
| H27B | 0.08041  | 0.24337  | 0.34760  | 1.735            |
| H31  | 0.05989  | 0.53940  | 0.24845  | 2.008            |
| H33  | -0.01830 | 0.33771  | 0.27598  | 1.753            |
| H34A | -0.09105 | 0.51971  | 0.19931  | 2.667            |
| H34B | -0.12258 | 0.44049  | 0.15461  | 2.667            |

Table S9-2. Atomic coordinates and  $B_{\text{iso}}$  involving hydrogens/ $B_{\text{eq}}$  (continued)

| atom | x        | y       | z       | $B_{\text{eq}}$ |
|------|----------|---------|---------|-----------------|
| H34C | -0.11306 | 0.46015 | 0.26521 | 2.667           |
| H35A | 0.21014  | 0.56746 | 0.29250 | 2.602           |
| H35B | 0.27546  | 0.52471 | 0.38965 | 2.602           |
| H35C | 0.26598  | 0.50045 | 0.28059 | 2.602           |
| H36  | 0.31393  | 0.27566 | 0.61301 | 2.411           |
| H38  | 0.43714  | 0.47091 | 0.61106 | 2.151           |
| H41A | 0.44306  | 0.18538 | 0.64431 | 3.561           |
| H41B | 0.51071  | 0.21086 | 0.59852 | 3.561           |
| H41C | 0.53543  | 0.22012 | 0.71582 | 3.561           |
| H42A | 0.59236  | 0.42579 | 0.64327 | 3.218           |
| H42B | 0.61971  | 0.35686 | 0.71603 | 3.218           |
| H42C | 0.59596  | 0.34715 | 0.59900 | 3.218           |
| H43A | 0.21689  | 0.39330 | 0.58337 | 2.975           |
| H43B | 0.27427  | 0.46126 | 0.64254 | 2.975           |
| H43C | 0.24275  | 0.45519 | 0.52367 | 2.975           |

Table S9-3. Anisotropic displacement parameters

| atom | U <sub>11</sub> | U <sub>22</sub> | U <sub>33</sub> | U <sub>12</sub> | U <sub>13</sub> | U <sub>23</sub> |
|------|-----------------|-----------------|-----------------|-----------------|-----------------|-----------------|
| Ti1  | 0.0140(3)       | 0.0208(3)       | 0.0207(3)       | -0.0003(2)      | 0.0063(2)       | -0.0012(2)      |
| Ti2  | 0.0127(3)       | 0.0154(3)       | 0.0196(3)       | -0.0015(2)      | 0.0028(2)       | 0.0023(2)       |
| Cl1  | 0.0434(5)       | 0.0300(5)       | 0.0243(4)       | -0.0137(4)      | 0.0199(4)       | -0.0068(4)      |
| Cl2  | 0.0187(4)       | 0.0331(5)       | 0.0605(7)       | 0.0061(4)       | 0.0080(4)       | -0.0115(5)      |
| Cl3  | 0.0201(4)       | 0.0257(4)       | 0.0309(5)       | -0.0054(3)      | 0.0091(4)       | 0.0047(3)       |
| O1   | 0.0146(11)      | 0.0202(11)      | 0.0173(11)      | 0.0003(9)       | 0.0037(9)       | 0.0025(9)       |
| O2   | 0.0150(11)      | 0.0157(11)      | 0.0255(12)      | 0.0003(9)       | 0.0038(10)      | 0.0005(9)       |
| O3   | 0.0145(11)      | 0.0181(11)      | 0.0209(12)      | 0.0003(9)       | 0.0040(9)       | 0.0001(9)       |
| N1   | 0.0155(13)      | 0.0152(13)      | 0.0152(13)      | 0.0028(10)      | 0.0044(11)      | 0.0036(10)      |
| C1   | 0.0188(16)      | 0.0166(16)      | 0.0180(16)      | 0.0003(13)      | 0.0039(13)      | -0.0030(13)     |
| C2   | 0.0196(16)      | 0.0207(16)      | 0.0127(15)      | -0.0003(13)     | 0.0057(13)      | -0.0036(12)     |
| C3   | 0.0152(15)      | 0.0188(16)      | 0.0165(15)      | -0.0011(12)     | 0.0071(13)      | -0.0028(12)     |
| C4   | 0.0227(17)      | 0.0176(16)      | 0.0149(15)      | 0.0030(13)      | 0.0068(13)      | -0.0006(12)     |
| C5   | 0.0312(19)      | 0.0200(17)      | 0.0172(16)      | -0.0027(14)     | 0.0126(14)      | 0.0020(13)      |
| C6   | 0.0243(17)      | 0.0266(18)      | 0.0193(16)      | -0.0067(14)     | 0.0132(14)      | -0.0083(14)     |
| C7   | 0.0149(15)      | 0.0285(18)      | 0.0163(16)      | 0.0014(13)      | 0.0063(13)      | -0.0034(13)     |
| C8   | 0.0262(19)      | 0.041(2)        | 0.0287(19)      | -0.0094(16)     | 0.0159(16)      | -0.0067(17)     |
| C9   | 0.0291(19)      | 0.0238(18)      | 0.0206(17)      | 0.0028(15)      | 0.0059(15)      | 0.0056(14)      |
| C10  | 0.0210(16)      | 0.0236(17)      | 0.0168(16)      | -0.0025(13)     | 0.0053(14)      | -0.0040(13)     |
| C11  | 0.0191(16)      | 0.0212(16)      | 0.0154(15)      | 0.0001(13)      | 0.0046(13)      | -0.0014(13)     |
| C12  | 0.0209(17)      | 0.0293(19)      | 0.0183(16)      | 0.0018(14)      | 0.0088(14)      | 0.0022(14)      |
| C13  | 0.0190(17)      | 0.0307(19)      | 0.0211(17)      | 0.0008(14)      | 0.0052(14)      | -0.0010(14)     |
| C14  | 0.0151(16)      | 0.0281(18)      | 0.0216(17)      | -0.0033(14)     | 0.0037(14)      | -0.0059(14)     |
| C15  | 0.0175(17)      | 0.038(2)        | 0.031(2)        | -0.0041(15)     | 0.0088(15)      | -0.0052(16)     |
| C16  | 0.0196(18)      | 0.053(3)        | 0.029(2)        | 0.0096(17)      | 0.0045(16)      | 0.0091(18)      |
| C17  | 0.0193(16)      | 0.0250(18)      | 0.0205(17)      | 0.0043(14)      | 0.0046(14)      | -0.0003(14)     |
| C18  | 0.0151(15)      | 0.0157(16)      | 0.0190(16)      | -0.0008(12)     | 0.0029(13)      | 0.0013(12)      |
| C19  | 0.0182(16)      | 0.0187(16)      | 0.0139(15)      | 0.0021(13)      | 0.0016(13)      | 0.0031(12)      |
| C20  | 0.0191(16)      | 0.0168(16)      | 0.0178(16)      | 0.0028(13)      | 0.0043(13)      | 0.0008(12)      |
| C21  | 0.0176(16)      | 0.0272(18)      | 0.0254(18)      | 0.0020(14)      | 0.0070(14)      | 0.0035(14)      |
| C22  | 0.0256(19)      | 0.030(2)        | 0.0268(19)      | 0.0133(15)      | 0.0067(16)      | 0.0039(15)      |
| C23  | 0.032(2)        | 0.0230(18)      | 0.0227(18)      | 0.0077(15)      | 0.0042(16)      | -0.0014(14)     |
| C24  | 0.0228(17)      | 0.0181(16)      | 0.0201(17)      | 0.0004(13)      | 0.0009(14)      | 0.0019(13)      |
| C25  | 0.045(3)        | 0.025(2)        | 0.046(2)        | 0.0116(18)      | 0.010(2)        | -0.0064(18)     |
| C26  | 0.0217(18)      | 0.038(2)        | 0.047(2)        | 0.0042(16)      | 0.0155(18)      | 0.0063(18)      |
| C27  | 0.0149(15)      | 0.0212(16)      | 0.0180(16)      | -0.0016(13)     | 0.0059(13)      | 0.0001(13)      |
| C28  | 0.0175(15)      | 0.0188(16)      | 0.0124(14)      | 0.0004(12)      | 0.0053(12)      | -0.0018(12)     |



Table S9-3. Anisotropic displacement parameters (continued)

| atom | U <sub>11</sub> | U <sub>22</sub> | U <sub>33</sub> | U <sub>12</sub> | U <sub>13</sub> | U <sub>23</sub> |
|------|-----------------|-----------------|-----------------|-----------------|-----------------|-----------------|
| C29  | 0.0136(14)      | 0.0201(16)      | 0.0148(15)      | 0.0039(12)      | 0.0030(12)      | -0.0006(12)     |
| C30  | 0.0221(16)      | 0.0169(16)      | 0.0191(16)      | 0.0015(13)      | 0.0085(14)      | -0.0017(13)     |
| C31  | 0.0245(17)      | 0.0171(16)      | 0.0205(17)      | 0.0074(13)      | 0.0077(14)      | 0.0024(13)      |
| C32  | 0.0175(16)      | 0.0257(18)      | 0.0158(16)      | 0.0038(13)      | 0.0059(13)      | -0.0014(13)     |
| C33  | 0.0152(15)      | 0.0231(17)      | 0.0172(16)      | 0.0001(13)      | 0.0065(13)      | -0.0035(13)     |
| C34  | 0.0207(17)      | 0.030(2)        | 0.0298(19)      | 0.0067(15)      | 0.0065(15)      | 0.0004(16)      |
| C35  | 0.0275(19)      | 0.0192(17)      | 0.036(2)        | 0.0007(14)      | 0.0130(16)      | 0.0007(15)      |
| C36  | 0.0258(18)      | 0.0273(19)      | 0.0197(17)      | -0.0110(15)     | 0.0057(14)      | 0.0046(14)      |
| C37  | 0.0225(17)      | 0.0291(19)      | 0.0134(15)      | -0.0040(14)     | 0.0027(13)      | 0.0003(13)      |
| C38  | 0.0203(17)      | 0.0200(17)      | 0.0224(17)      | -0.0047(13)     | 0.0033(14)      | 0.0004(13)      |
| C39  | 0.0196(17)      | 0.0254(18)      | 0.0200(17)      | -0.0048(14)     | -0.0027(14)     | 0.0028(14)      |
| C40  | 0.0262(18)      | 0.0231(18)      | 0.0185(17)      | -0.0042(14)     | -0.0034(14)     | 0.0045(14)      |
| C41  | 0.043(2)        | 0.0222(19)      | 0.030(2)        | -0.0014(17)     | -0.0030(18)     | 0.0073(16)      |
| C42  | 0.0171(17)      | 0.037(2)        | 0.036(2)        | -0.0013(16)     | -0.0008(16)     | 0.0027(17)      |
| C43  | 0.0229(18)      | 0.046(2)        | 0.0255(19)      | -0.0011(17)     | 0.0097(16)      | -0.0064(17)     |

The general temperature factor expression:  $\exp(-2\pi^2(a^2U_{11}h^2 + b^2U_{22}k^2 + c^2U_{33}l^2 + 2a*b*U_{12}hk + 2a*c*U_{13}hl + 2b*c*U_{23}kl))$

Table S9-4. Bond lengths (Å)

| atom | atom | distance   | atom | atom | distance   |
|------|------|------------|------|------|------------|
| Ti1  | Cl1  | 2.2703(11) | Ti1  | Cl2  | 2.2655(11) |
| Ti1  | O1   | 1.771(2)   | Ti1  | C10  | 2.353(3)   |
| Ti1  | C11  | 2.322(4)   | Ti1  | C12  | 2.307(4)   |
| Ti1  | C13  | 2.390(3)   | Ti1  | C14  | 2.393(3)   |
| Ti2  | Cl3  | 2.3046(13) | Ti2  | O2   | 1.802(2)   |
| Ti2  | O3   | 1.793(2)   | Ti2  | C36  | 2.317(4)   |
| Ti2  | C37  | 2.375(4)   | Ti2  | C38  | 2.361(3)   |
| Ti2  | C39  | 2.395(3)   | Ti2  | C40  | 2.376(3)   |
| O1   | C3   | 1.363(4)   | O2   | C20  | 1.357(4)   |
| O3   | C29  | 1.365(4)   | N1   | C1   | 1.472(4)   |
| N1   | C18  | 1.460(4)   | N1   | C27  | 1.463(5)   |
| C1   | C2   | 1.512(5)   | C2   | C3   | 1.398(4)   |
| C2   | C7   | 1.390(5)   | C3   | C4   | 1.399(5)   |
| C4   | C5   | 1.384(5)   | C4   | C9   | 1.506(4)   |
| C5   | C6   | 1.393(4)   | C6   | C7   | 1.389(5)   |
| C6   | C8   | 1.509(5)   | C10  | C11  | 1.408(6)   |
| C10  | C14  | 1.418(4)   | C11  | C12  | 1.417(5)   |
| C11  | C17  | 1.500(5)   | C12  | C13  | 1.418(5)   |
| C13  | C14  | 1.415(6)   | C13  | C16  | 1.495(5)   |
| C14  | C15  | 1.506(6)   | C18  | C19  | 1.501(5)   |
| C19  | C20  | 1.399(5)   | C19  | C24  | 1.393(5)   |
| C20  | C21  | 1.398(5)   | C21  | C22  | 1.400(5)   |
| C21  | C26  | 1.503(5)   | C22  | C23  | 1.381(5)   |
| C23  | C24  | 1.393(6)   | C23  | C25  | 1.512(5)   |
| C27  | C28  | 1.504(4)   | C28  | C29  | 1.400(5)   |
| C28  | C33  | 1.388(4)   | C29  | C30  | 1.390(4)   |
| C30  | C31  | 1.391(5)   | C30  | C35  | 1.507(5)   |
| C31  | C32  | 1.388(5)   | C32  | C33  | 1.385(5)   |
| C32  | C34  | 1.510(5)   | C36  | C37  | 1.414(5)   |
| C36  | C40  | 1.420(5)   | C37  | C38  | 1.403(5)   |
| C37  | C43  | 1.498(5)   | C38  | C39  | 1.418(5)   |
| C39  | C40  | 1.406(5)   | C39  | C42  | 1.495(5)   |
| C40  | C41  | 1.506(5)   |      |      |            |

Table S9-5. Bond lengths involving hydrogens (Å)

| atom | atom | distance | atom | atom | distance |
|------|------|----------|------|------|----------|
| C1   | H1A  | 0.990    | C1   | H1B  | 0.990    |
| C5   | H5   | 0.950    | C7   | H7   | 0.950    |
| C8   | H8A  | 0.980    | C8   | H8B  | 0.980    |
| C8   | H8C  | 0.980    | C9   | H9A  | 0.980    |
| C9   | H9B  | 0.980    | C9   | H9C  | 0.980    |
| C10  | H10  | 1.000    | C12  | H12  | 1.000    |
| C15  | H15A | 0.980    | C15  | H15B | 0.980    |
| C15  | H15C | 0.980    | C16  | H16A | 0.980    |
| C16  | H16B | 0.980    | C16  | H16C | 0.980    |
| C17  | H17A | 0.980    | C17  | H17B | 0.980    |
| C17  | H17C | 0.980    | C18  | H18A | 0.990    |
| C18  | H18B | 0.990    | C22  | H22  | 0.950    |
| C24  | H24  | 0.950    | C25  | H25A | 0.980    |
| C25  | H25B | 0.980    | C25  | H25C | 0.980    |
| C26  | H26A | 0.980    | C26  | H26B | 0.980    |
| C26  | H26C | 0.980    | C27  | H27A | 0.990    |
| C27  | H27B | 0.990    | C31  | H31  | 0.950    |
| C33  | H33  | 0.950    | C34  | H34A | 0.980    |
| C34  | H34B | 0.980    | C34  | H34C | 0.980    |
| C35  | H35A | 0.980    | C35  | H35B | 0.980    |
| C35  | H35C | 0.980    | C36  | H36  | 1.000    |
| C38  | H38  | 1.000    | C41  | H41A | 0.980    |
| C41  | H41B | 0.980    | C41  | H41C | 0.980    |
| C42  | H42A | 0.980    | C42  | H42B | 0.980    |
| C42  | H42C | 0.980    | C43  | H43A | 0.980    |
| C43  | H43B | 0.980    | C43  | H43C | 0.980    |

Table S9-6. Bond angles (°)

| atom | atom | atom | angle      | atom | atom | atom | angle      |
|------|------|------|------------|------|------|------|------------|
| Cl1  | Ti1  | Cl2  | 101.44(5)  | Cl1  | Ti1  | O1   | 101.03(8)  |
| Cl1  | Ti1  | C10  | 85.04(9)   | Cl1  | Ti1  | C11  | 104.07(9)  |
| Cl1  | Ti1  | C12  | 139.40(9)  | Cl1  | Ti1  | C13  | 136.34(10) |
| Cl1  | Ti1  | C14  | 101.93(10) | Cl2  | Ti1  | O1   | 104.74(8)  |
| Cl2  | Ti1  | C10  | 125.07(8)  | Cl2  | Ti1  | C11  | 144.08(7)  |
| Cl2  | Ti1  | C12  | 113.25(9)  | Cl2  | Ti1  | C13  | 85.51(9)   |
| Cl2  | Ti1  | C14  | 91.74(9)   | O1   | Ti1  | C10  | 127.72(12) |
| O1   | Ti1  | C11  | 94.75(12)  | O1   | Ti1  | C12  | 90.25(12)  |
| O1   | Ti1  | C13  | 118.97(13) | O1   | Ti1  | C14  | 148.33(14) |
| C10  | Ti1  | C11  | 35.06(13)  | C10  | Ti1  | C12  | 58.21(13)  |
| C10  | Ti1  | C13  | 57.49(11)  | C10  | Ti1  | C14  | 34.75(11)  |
| C11  | Ti1  | C12  | 35.65(12)  | C11  | Ti1  | C13  | 58.59(11)  |
| C11  | Ti1  | C14  | 58.57(12)  | C12  | Ti1  | C13  | 35.09(13)  |
| C12  | Ti1  | C14  | 58.21(14)  | C13  | Ti1  | C14  | 34.42(13)  |
| Cl3  | Ti2  | O2   | 100.36(10) | Cl3  | Ti2  | O3   | 102.06(9)  |
| Cl3  | Ti2  | C36  | 143.38(9)  | Cl3  | Ti2  | C37  | 121.03(9)  |
| Cl3  | Ti2  | C38  | 89.16(10)  | Cl3  | Ti2  | C39  | 86.41(10)  |
| Cl3  | Ti2  | C40  | 115.69(10) | O2   | Ti2  | O3   | 106.52(10) |
| O2   | Ti2  | C36  | 99.01(12)  | O2   | Ti2  | C37  | 133.73(13) |
| O2   | Ti2  | C38  | 143.58(10) | O2   | Ti2  | C39  | 110.34(11) |
| O2   | Ti2  | C40  | 87.00(11)  | O3   | Ti2  | C36  | 101.78(13) |
| O3   | Ti2  | C37  | 85.51(11)  | O3   | Ti2  | C38  | 105.64(11) |
| O3   | Ti2  | C39  | 139.93(13) | O3   | Ti2  | C40  | 136.97(14) |
| C36  | Ti2  | C37  | 35.04(12)  | C36  | Ti2  | C38  | 57.72(13)  |
| C36  | Ti2  | C39  | 57.69(13)  | C36  | Ti2  | C40  | 35.19(13)  |
| C37  | Ti2  | C38  | 34.46(13)  | C37  | Ti2  | C39  | 57.62(13)  |
| C37  | Ti2  | C40  | 58.13(12)  | C38  | Ti2  | C39  | 34.68(12)  |
| C38  | Ti2  | C40  | 57.57(12)  | C39  | Ti2  | C40  | 34.28(12)  |
| Ti1  | O1   | C3   | 167.6(2)   | Ti2  | O2   | C20  | 170.0(3)   |
| Ti2  | O3   | C29  | 168.4(3)   | C1   | N1   | C18  | 111.8(2)   |
| C1   | N1   | C27  | 112.8(2)   | C18  | N1   | C27  | 110.6(3)   |
| N1   | C1   | C2   | 112.3(2)   | C1   | C2   | C3   | 122.5(3)   |
| C1   | C2   | C7   | 119.8(3)   | C3   | C2   | C7   | 117.6(3)   |
| O1   | C3   | C2   | 120.1(3)   | O1   | C3   | C4   | 117.9(3)   |
| C2   | C3   | C4   | 121.9(3)   | C3   | C4   | C5   | 117.9(3)   |
| C3   | C4   | C9   | 120.2(3)   | C5   | C4   | C9   | 121.9(3)   |
| C4   | C5   | C6   | 122.5(3)   | C5   | C6   | C7   | 117.6(3)   |

Table S9-6. Bond angles ( $^{\circ}$ ) (continued)

| atom | atom | atom | angle     | atom | atom | atom | angle     |
|------|------|------|-----------|------|------|------|-----------|
| C5   | C6   | C8   | 120.8(3)  | C7   | C6   | C8   | 121.6(3)  |
| C2   | C7   | C6   | 122.5(3)  | Ti1  | C10  | C11  | 71.24(19) |
| Ti1  | C10  | C14  | 74.16(19) | C11  | C10  | C14  | 109.4(3)  |
| Ti1  | C11  | C10  | 73.7(2)   | Ti1  | C11  | C12  | 71.6(2)   |
| Ti1  | C11  | C17  | 121.1(2)  | C10  | C11  | C12  | 106.7(3)  |
| C10  | C11  | C17  | 126.8(3)  | C12  | C11  | C17  | 126.5(4)  |
| Ti1  | C12  | C11  | 72.7(2)   | Ti1  | C12  | C13  | 75.7(2)   |
| C11  | C12  | C13  | 108.9(3)  | Ti1  | C13  | C12  | 69.25(18) |
| Ti1  | C13  | C14  | 72.91(18) | Ti1  | C13  | C16  | 124.6(3)  |
| C12  | C13  | C14  | 107.7(3)  | C12  | C13  | C16  | 125.9(4)  |
| C14  | C13  | C16  | 126.4(3)  | Ti1  | C14  | C10  | 71.09(17) |
| Ti1  | C14  | C13  | 72.67(18) | Ti1  | C14  | C15  | 122.4(3)  |
| C10  | C14  | C13  | 107.3(3)  | C10  | C14  | C15  | 126.6(3)  |
| C13  | C14  | C15  | 126.1(3)  | N1   | C18  | C19  | 114.1(3)  |
| C18  | C19  | C20  | 121.0(3)  | C18  | C19  | C24  | 120.9(3)  |
| C20  | C19  | C24  | 117.9(3)  | O2   | C20  | C19  | 119.9(3)  |
| O2   | C20  | C21  | 118.8(3)  | C19  | C20  | C21  | 121.4(3)  |
| C20  | C21  | C22  | 118.1(3)  | C20  | C21  | C26  | 120.8(3)  |
| C22  | C21  | C26  | 121.1(4)  | C21  | C22  | C23  | 122.3(4)  |
| C22  | C23  | C24  | 117.8(3)  | C22  | C23  | C25  | 121.4(4)  |
| C24  | C23  | C25  | 120.8(4)  | C19  | C24  | C23  | 122.5(3)  |
| N1   | C27  | C28  | 114.5(3)  | C27  | C28  | C29  | 120.9(3)  |
| C27  | C28  | C33  | 121.2(3)  | C29  | C28  | C33  | 117.9(3)  |
| O3   | C29  | C28  | 120.0(3)  | O3   | C29  | C30  | 118.6(3)  |
| C28  | C29  | C30  | 121.4(3)  | C29  | C30  | C31  | 118.2(3)  |
| C29  | C30  | C35  | 119.7(3)  | C31  | C30  | C35  | 122.1(3)  |
| C30  | C31  | C32  | 122.1(3)  | C31  | C32  | C33  | 117.8(3)  |
| C31  | C32  | C34  | 121.1(3)  | C33  | C32  | C34  | 121.1(3)  |
| C28  | C33  | C32  | 122.4(3)  | Ti2  | C36  | C37  | 74.7(2)   |
| Ti2  | C36  | C40  | 74.7(2)   | C37  | C36  | C40  | 109.1(3)  |
| Ti2  | C37  | C36  | 70.2(2)   | Ti2  | C37  | C38  | 72.2(2)   |
| Ti2  | C37  | C43  | 122.2(2)  | C36  | C37  | C38  | 106.6(3)  |
| C36  | C37  | C43  | 126.9(3)  | C38  | C37  | C43  | 126.4(3)  |
| Ti2  | C38  | C37  | 73.3(2)   | Ti2  | C38  | C39  | 73.96(19) |
| C37  | C38  | C39  | 109.2(3)  | Ti2  | C39  | C38  | 71.36(17) |
| Ti2  | C39  | C40  | 72.12(17) | Ti2  | C39  | C42  | 123.5(3)  |
| C38  | C39  | C40  | 107.8(3)  | C38  | C39  | C42  | 124.7(3)  |

Table S9-6. Bond angles ( $^{\circ}$ ) (continued)

| atom | atom | atom | angle     | atom | atom | atom | angle     |
|------|------|------|-----------|------|------|------|-----------|
| C40  | C39  | C42  | 127.5(3)  | Ti2  | C40  | C36  | 70.14(19) |
| Ti2  | C40  | C39  | 73.60(19) | Ti2  | C40  | C41  | 122.2(3)  |
| C36  | C40  | C39  | 107.2(3)  | C36  | C40  | C41  | 125.6(3)  |
| C39  | C40  | C41  | 127.2(4)  |      |      |      |           |

Table S9-7. Bond angles involving hydrogens ( $^{\circ}$ )

| atom | atom | atom | angle | atom | atom | atom | angle |
|------|------|------|-------|------|------|------|-------|
| N1   | C1   | H1A  | 109.1 | N1   | C1   | H1B  | 109.1 |
| C2   | C1   | H1A  | 109.1 | C2   | C1   | H1B  | 109.1 |
| H1A  | C1   | H1B  | 107.9 | C4   | C5   | H5   | 118.8 |
| C6   | C5   | H5   | 118.8 | C2   | C7   | H7   | 118.7 |
| C6   | C7   | H7   | 118.7 | C6   | C8   | H8A  | 109.5 |
| C6   | C8   | H8B  | 109.5 | C6   | C8   | H8C  | 109.5 |
| H8A  | C8   | H8B  | 109.5 | H8A  | C8   | H8C  | 109.5 |
| H8B  | C8   | H8C  | 109.5 | C4   | C9   | H9A  | 109.5 |
| C4   | C9   | H9B  | 109.5 | C4   | C9   | H9C  | 109.5 |
| H9A  | C9   | H9B  | 109.5 | H9A  | C9   | H9C  | 109.5 |
| H9B  | C9   | H9C  | 109.5 | Ti1  | C10  | H10  | 125.2 |
| C11  | C10  | H10  | 125.2 | C14  | C10  | H10  | 125.2 |
| Ti1  | C12  | H12  | 125.2 | C11  | C12  | H12  | 125.2 |
| C13  | C12  | H12  | 125.2 | C14  | C15  | H15A | 109.5 |
| C14  | C15  | H15B | 109.5 | C14  | C15  | H15C | 109.5 |
| H15A | C15  | H15B | 109.5 | H15A | C15  | H15C | 109.5 |
| H15B | C15  | H15C | 109.5 | C13  | C16  | H16A | 109.5 |
| C13  | C16  | H16B | 109.5 | C13  | C16  | H16C | 109.5 |
| H16A | C16  | H16B | 109.5 | H16A | C16  | H16C | 109.5 |
| H16B | C16  | H16C | 109.5 | C11  | C17  | H17A | 109.5 |
| C11  | C17  | H17B | 109.5 | C11  | C17  | H17C | 109.5 |
| H17A | C17  | H17B | 109.5 | H17A | C17  | H17C | 109.5 |
| H17B | C17  | H17C | 109.5 | N1   | C18  | H18A | 108.7 |
| N1   | C18  | H18B | 108.7 | C19  | C18  | H18A | 108.7 |
| C19  | C18  | H18B | 108.7 | H18A | C18  | H18B | 107.6 |
| C21  | C22  | H22  | 118.9 | C23  | C22  | H22  | 118.9 |
| C19  | C24  | H24  | 118.8 | C23  | C24  | H24  | 118.7 |
| C23  | C25  | H25A | 109.5 | C23  | C25  | H25B | 109.5 |
| C23  | C25  | H25C | 109.5 | H25A | C25  | H25B | 109.5 |
| H25A | C25  | H25C | 109.5 | H25B | C25  | H25C | 109.5 |
| C21  | C26  | H26A | 109.5 | C21  | C26  | H26B | 109.5 |
| C21  | C26  | H26C | 109.5 | H26A | C26  | H26B | 109.5 |
| H26A | C26  | H26C | 109.5 | H26B | C26  | H26C | 109.5 |
| N1   | C27  | H27A | 108.6 | N1   | C27  | H27B | 108.6 |
| C28  | C27  | H27A | 108.6 | C28  | C27  | H27B | 108.6 |
| H27A | C27  | H27B | 107.6 | C30  | C31  | H31  | 119.0 |
| C32  | C31  | H31  | 119.0 | C28  | C33  | H33  | 118.8 |

Table S9-7. Bond angles involving hydrogens ( $^{\circ}$ ) (continued)

| atom | atom | atom | angle | atom | atom | atom | angle |
|------|------|------|-------|------|------|------|-------|
| C32  | C33  | H33  | 118.8 | C32  | C34  | H34A | 109.5 |
| C32  | C34  | H34B | 109.5 | C32  | C34  | H34C | 109.5 |
| H34A | C34  | H34B | 109.5 | H34A | C34  | H34C | 109.5 |
| H34B | C34  | H34C | 109.5 | C30  | C35  | H35A | 109.5 |
| C30  | C35  | H35B | 109.5 | C30  | C35  | H35C | 109.5 |
| H35A | C35  | H35B | 109.5 | H35A | C35  | H35C | 109.5 |
| H35B | C35  | H35C | 109.5 | Ti2  | C36  | H36  | 125.1 |
| C37  | C36  | H36  | 125.1 | C40  | C36  | H36  | 125.1 |
| Ti2  | C38  | H38  | 125.2 | C37  | C38  | H38  | 125.2 |
| C39  | C38  | H38  | 125.2 | C40  | C41  | H41A | 109.5 |
| C40  | C41  | H41B | 109.5 | C40  | C41  | H41C | 109.5 |
| H41A | C41  | H41B | 109.5 | H41A | C41  | H41C | 109.5 |
| H41B | C41  | H41C | 109.5 | C39  | C42  | H42A | 109.5 |
| C39  | C42  | H42B | 109.5 | C39  | C42  | H42C | 109.5 |
| H42A | C42  | H42B | 109.5 | H42A | C42  | H42C | 109.5 |
| H42B | C42  | H42C | 109.5 | C37  | C43  | H43A | 109.5 |
| C37  | C43  | H43B | 109.5 | C37  | C43  | H43C | 109.5 |
| H43A | C43  | H43B | 109.5 | H43A | C43  | H43C | 109.5 |
| H43B | C43  | H43C | 109.5 |      |      |      |       |



Table S9-8. Torsion Angles(°)

(Those having bond angles &gt; 160 or &lt; 20 degrees are excluded.)

| atom1 | atom2 | atom3 | atom4 | angle       | atom1 | atom2 | atom3 | atom4 | angle       |
|-------|-------|-------|-------|-------------|-------|-------|-------|-------|-------------|
| Cl1   | Ti1   | C10   | C11   | -123.26(11) | Cl1   | Ti1   | C10   | C14   | 119.29(15)  |
| Cl1   | Ti1   | C11   | C10   | 59.19(11)   | Cl1   | Ti1   | C11   | C12   | 173.60(10)  |
| Cl1   | Ti1   | C11   | C17   | -64.3(2)    | Cl1   | Ti1   | C12   | C11   | -9.6(2)     |
| Cl1   | Ti1   | C12   | C13   | 105.84(14)  | Cl1   | Ti1   | C13   | C12   | -114.94(14) |
| Cl1   | Ti1   | C13   | C14   | 2.2(2)      | Cl1   | Ti1   | C13   | C16   | 125.0(2)    |
| Cl1   | Ti1   | C14   | C10   | -62.64(16)  | Cl1   | Ti1   | C14   | C13   | -178.45(12) |
| Cl1   | Ti1   | C14   | C15   | 59.3(2)     | Cl2   | Ti1   | C10   | C11   | 136.24(9)   |
| Cl2   | Ti1   | C10   | C14   | 18.8(2)     | Cl2   | Ti1   | C11   | C10   | -74.8(2)    |
| Cl2   | Ti1   | C11   | C12   | 39.6(2)     | Cl2   | Ti1   | C11   | C17   | 161.72(12)  |
| Cl2   | Ti1   | C12   | C11   | -155.99(9)  | Cl2   | Ti1   | C12   | C13   | -40.57(16)  |
| Cl2   | Ti1   | C13   | C12   | 143.17(13)  | Cl2   | Ti1   | C13   | C14   | -99.69(14)  |
| Cl2   | Ti1   | C13   | C16   | 23.1(3)     | Cl2   | Ti1   | C14   | C10   | -164.72(15) |
| Cl2   | Ti1   | C14   | C13   | 79.47(13)   | Cl2   | Ti1   | C14   | C15   | -42.7(2)    |
| O1    | Ti1   | C10   | C11   | -23.14(19)  | O1    | Ti1   | C10   | C14   | -140.60(14) |
| O1    | Ti1   | C11   | C10   | 161.82(12)  | O1    | Ti1   | C11   | C12   | -83.77(13)  |
| O1    | Ti1   | C11   | C17   | 38.3(2)     | O1    | Ti1   | C12   | C11   | 97.83(14)   |
| O1    | Ti1   | C12   | C13   | -146.76(14) | O1    | Ti1   | C13   | C12   | 38.79(18)   |
| O1    | Ti1   | C13   | C14   | 155.93(13)  | O1    | Ti1   | C13   | C16   | -81.3(3)    |
| O1    | Ti1   | C14   | C10   | 73.0(3)     | O1    | Ti1   | C14   | C13   | -42.8(3)    |
| O1    | Ti1   | C14   | C15   | -165.03(16) | C10   | Ti1   | C11   | C10   | -0.00(12)   |
| C10   | Ti1   | C11   | C12   | 114.4(2)    | C10   | Ti1   | C11   | C17   | -123.5(3)   |
| C11   | Ti1   | C10   | C11   | 0.00(12)    | C11   | Ti1   | C10   | C14   | -117.5(2)   |
| C10   | Ti1   | C12   | C11   | -37.99(12)  | C10   | Ti1   | C12   | C13   | 77.42(16)   |
| C12   | Ti1   | C10   | C11   | 38.64(12)   | C12   | Ti1   | C10   | C14   | -78.82(16)  |
| C10   | Ti1   | C13   | C12   | -79.66(17)  | C10   | Ti1   | C13   | C14   | 37.48(14)   |
| C10   | Ti1   | C13   | C16   | 160.3(3)    | C13   | Ti1   | C10   | C11   | 80.34(17)   |
| C13   | Ti1   | C10   | C14   | -37.12(15)  | C10   | Ti1   | C14   | C10   | 0.00(18)    |
| C10   | Ti1   | C14   | C13   | -115.8(3)   | C10   | Ti1   | C14   | C15   | 122.0(4)    |
| C14   | Ti1   | C10   | C11   | 117.5(3)    | C14   | Ti1   | C10   | C14   | 0.00(18)    |
| C11   | Ti1   | C12   | C11   | -0.00(14)   | C11   | Ti1   | C12   | C13   | 115.4(3)    |
| C12   | Ti1   | C11   | C10   | -114.4(2)   | C12   | Ti1   | C11   | C12   | -0.00(15)   |
| C12   | Ti1   | C11   | C17   | 122.1(3)    | C11   | Ti1   | C13   | C12   | -38.08(14)  |
| C11   | Ti1   | C13   | C14   | 79.06(17)   | C11   | Ti1   | C13   | C16   | -158.1(3)   |
| C13   | Ti1   | C11   | C10   | -76.93(15)  | C13   | Ti1   | C11   | C12   | 37.47(13)   |
| C13   | Ti1   | C11   | C17   | 159.6(3)    | C11   | Ti1   | C14   | C10   | 36.69(14)   |
| C11   | Ti1   | C14   | C13   | -79.13(17)  | C11   | Ti1   | C14   | C15   | 158.7(3)    |
| C14   | Ti1   | C11   | C10   | -36.36(12)  | C14   | Ti1   | C11   | C12   | 78.05(14)   |

Table S9-8. Torsion angles ( $^{\circ}$ ) (continued)

| atom1 | atom2 | atom3 | atom4 | angle       | atom1 | atom2 | atom3 | atom4 | angle       |
|-------|-------|-------|-------|-------------|-------|-------|-------|-------|-------------|
| C14   | Ti1   | C11   | C17   | -159.8(3)   | C12   | Ti1   | C13   | C12   | 0.00(15)    |
| C12   | Ti1   | C13   | C14   | 117.1(3)    | C12   | Ti1   | C13   | C16   | -120.1(4)   |
| C13   | Ti1   | C12   | C11   | -115.4(3)   | C13   | Ti1   | C12   | C13   | 0.00(15)    |
| C12   | Ti1   | C14   | C10   | 78.81(17)   | C12   | Ti1   | C14   | C13   | -37.00(14)  |
| C12   | Ti1   | C14   | C15   | -159.2(3)   | C14   | Ti1   | C12   | C11   | -79.13(16)  |
| C14   | Ti1   | C12   | C13   | 36.29(13)   | C13   | Ti1   | C14   | C10   | 115.8(3)    |
| C13   | Ti1   | C14   | C13   | 0.00(16)    | C13   | Ti1   | C14   | C15   | -122.2(3)   |
| C14   | Ti1   | C13   | C12   | -117.1(3)   | C14   | Ti1   | C13   | C14   | 0.00(16)    |
| C14   | Ti1   | C13   | C16   | 122.8(4)    | Cl3   | Ti2   | C36   | C37   | 65.6(2)     |
| Cl3   | Ti2   | C36   | C40   | -49.7(2)    | Cl3   | Ti2   | C37   | C36   | -140.67(9)  |
| Cl3   | Ti2   | C37   | C38   | -24.93(16)  | Cl3   | Ti2   | C37   | C43   | 97.4(2)     |
| Cl3   | Ti2   | C38   | C37   | 158.82(11)  | Cl3   | Ti2   | C38   | C39   | -84.90(14)  |
| Cl3   | Ti2   | C39   | C38   | 93.72(14)   | Cl3   | Ti2   | C39   | C40   | -149.71(15) |
| Cl3   | Ti2   | C39   | C42   | -26.1(2)    | Cl3   | Ti2   | C40   | C36   | 149.68(9)   |
| Cl3   | Ti2   | C40   | C39   | 33.96(19)   | Cl3   | Ti2   | C40   | C41   | -90.1(2)    |
| O2    | Ti2   | C36   | C37   | -173.21(12) | O2    | Ti2   | C36   | C40   | 71.54(14)   |
| O2    | Ti2   | C37   | C36   | 9.3(2)      | O2    | Ti2   | C37   | C38   | 125.04(14)  |
| O2    | Ti2   | C37   | C43   | -112.6(2)   | O2    | Ti2   | C38   | C37   | -94.7(2)    |
| O2    | Ti2   | C38   | C39   | 21.5(3)     | O2    | Ti2   | C39   | C38   | -166.56(15) |
| O2    | Ti2   | C39   | C40   | -50.0(2)    | O2    | Ti2   | C39   | C42   | 73.6(2)     |
| O2    | Ti2   | C40   | C36   | -110.27(14) | O2    | Ti2   | C40   | C39   | 134.02(17)  |
| O2    | Ti2   | C40   | C41   | 10.0(2)     | O3    | Ti2   | C36   | C37   | -64.11(14)  |
| O3    | Ti2   | C36   | C40   | -179.37(13) | O3    | Ti2   | C37   | C36   | 117.95(14)  |
| O3    | Ti2   | C37   | C38   | -126.31(14) | O3    | Ti2   | C37   | C43   | -3.9(2)     |
| O3    | Ti2   | C38   | C37   | 56.53(15)   | O3    | Ti2   | C38   | C39   | 172.81(14)  |
| O3    | Ti2   | C39   | C38   | -10.8(3)    | O3    | Ti2   | C39   | C40   | 105.78(19)  |
| O3    | Ti2   | C39   | C42   | -130.6(2)   | O3    | Ti2   | C40   | C36   | 0.9(2)      |
| O3    | Ti2   | C40   | C39   | -114.81(18) | O3    | Ti2   | C40   | C41   | 121.2(2)    |
| C36   | Ti2   | C37   | C36   | 0.00(14)    | C36   | Ti2   | C37   | C38   | 115.7(2)    |
| C36   | Ti2   | C37   | C43   | -121.9(3)   | C37   | Ti2   | C36   | C37   | -0.00(13)   |
| C37   | Ti2   | C36   | C40   | -115.3(2)   | C36   | Ti2   | C38   | C37   | -37.71(13)  |
| C36   | Ti2   | C38   | C39   | 78.57(17)   | C38   | Ti2   | C36   | C37   | 37.07(12)   |
| C38   | Ti2   | C36   | C40   | -78.18(15)  | C36   | Ti2   | C39   | C38   | -78.67(18)  |
| C36   | Ti2   | C39   | C40   | 37.90(15)   | C36   | Ti2   | C39   | C42   | 161.5(3)    |
| C39   | Ti2   | C36   | C37   | 78.36(15)   | C39   | Ti2   | C36   | C40   | -36.90(13)  |
| C36   | Ti2   | C40   | C36   | 0.00(15)    | C36   | Ti2   | C40   | C39   | -115.7(3)   |
| C36   | Ti2   | C40   | C41   | 120.3(3)    | C40   | Ti2   | C36   | C37   | 115.3(2)    |

Table S9-8. Torsion angles ( $^{\circ}$ ) (continued)

| atom1 | atom2 | atom3 | atom4 | angle      | atom1 | atom2 | atom3 | atom4 | angle      |
|-------|-------|-------|-------|------------|-------|-------|-------|-------|------------|
| C40   | Ti2   | C36   | C40   | 0.00(14)   | C37   | Ti2   | C38   | C37   | -0.00(14)  |
| C37   | Ti2   | C38   | C39   | 116.3(3)   | C38   | Ti2   | C37   | C36   | -115.7(2)  |
| C38   | Ti2   | C37   | C38   | -0.00(13)  | C38   | Ti2   | C37   | C43   | 122.4(3)   |
| C37   | Ti2   | C39   | C38   | -36.92(15) | C37   | Ti2   | C39   | C40   | 79.65(18)  |
| C37   | Ti2   | C39   | C42   | -156.7(3)  | C39   | Ti2   | C37   | C36   | -78.58(15) |
| C39   | Ti2   | C37   | C38   | 37.16(13)  | C39   | Ti2   | C37   | C43   | 159.5(3)   |
| C37   | Ti2   | C40   | C36   | 37.69(13)  | C37   | Ti2   | C40   | C39   | -78.02(17) |
| C37   | Ti2   | C40   | C41   | 158.0(3)   | C40   | Ti2   | C37   | C36   | -37.86(13) |
| C40   | Ti2   | C37   | C38   | 77.88(15)  | C40   | Ti2   | C37   | C43   | -159.7(3)  |
| C38   | Ti2   | C39   | C38   | 0.00(17)   | C38   | Ti2   | C39   | C40   | 116.6(3)   |
| C38   | Ti2   | C39   | C42   | -119.8(3)  | C39   | Ti2   | C38   | C37   | -116.3(3)  |
| C39   | Ti2   | C38   | C39   | -0.00(17)  | C38   | Ti2   | C40   | C36   | 78.64(17)  |
| C38   | Ti2   | C40   | C39   | -37.07(15) | C38   | Ti2   | C40   | C41   | -161.1(3)  |
| C40   | Ti2   | C38   | C37   | -79.64(17) | C40   | Ti2   | C38   | C39   | 36.64(15)  |
| C39   | Ti2   | C40   | C36   | 115.7(3)   | C39   | Ti2   | C40   | C39   | -0.00(17)  |
| C39   | Ti2   | C40   | C41   | -124.0(4)  | C40   | Ti2   | C39   | C38   | -116.6(3)  |
| C40   | Ti2   | C39   | C40   | -0.00(18)  | C40   | Ti2   | C39   | C42   | 123.6(4)   |
| C1    | N1    | C18   | C19   | 70.2(3)    | C18   | N1    | C1    | C2    | -157.9(3)  |
| C1    | N1    | C27   | C28   | -70.4(3)   | C27   | N1    | C1    | C2    | 76.7(3)    |
| C18   | N1    | C27   | C28   | 163.55(19) | C27   | N1    | C18   | C19   | -163.2(2)  |
| N1    | C1    | C2    | C3    | -118.3(3)  | N1    | C1    | C2    | C7    | 58.7(4)    |
| C1    | C2    | C3    | O1    | 1.8(5)     | C1    | C2    | C3    | C4    | 176.7(3)   |
| C1    | C2    | C7    | C6    | -176.0(3)  | C3    | C2    | C7    | C6    | 1.0(5)     |
| C7    | C2    | C3    | O1    | -175.1(3)  | C7    | C2    | C3    | C4    | -0.3(5)    |
| O1    | C3    | C4    | C5    | 174.7(3)   | O1    | C3    | C4    | C9    | -2.8(5)    |
| C2    | C3    | C4    | C5    | -0.2(5)    | C2    | C3    | C4    | C9    | -177.8(3)  |
| C3    | C4    | C5    | C6    | 0.0(5)     | C9    | C4    | C5    | C6    | 177.6(3)   |
| C4    | C5    | C6    | C7    | 0.6(5)     | C4    | C5    | C6    | C8    | -179.2(3)  |
| C5    | C6    | C7    | C2    | -1.2(5)    | C8    | C6    | C7    | C2    | 178.6(3)   |
| Ti1   | C10   | C11   | Ti1   | -0.000(13) | Ti1   | C10   | C11   | C12   | -64.46(18) |
| Ti1   | C10   | C11   | C17   | 116.9(3)   | Ti1   | C10   | C14   | Ti1   | 0.000(18)  |
| Ti1   | C10   | C14   | C13   | 64.14(19)  | Ti1   | C10   | C14   | C15   | -116.8(3)  |
| C11   | C10   | C14   | Ti1   | -63.0(2)   | C11   | C10   | C14   | C13   | 1.2(4)     |
| C11   | C10   | C14   | C15   | -179.8(3)  | C14   | C10   | C11   | Ti1   | 64.8(2)    |
| C14   | C10   | C11   | C12   | 0.4(4)     | C14   | C10   | C11   | C17   | -178.2(3)  |
| Ti1   | C11   | C12   | Ti1   | 0.000(16)  | Ti1   | C11   | C12   | C13   | -67.6(2)   |
| C10   | C11   | C12   | Ti1   | 65.9(2)    | C10   | C11   | C12   | C13   | -1.8(4)    |

Table S9-8. Torsion angles ( $^{\circ}$ ) (continued)

| atom1 | atom2 | atom3 | atom4 | angle      | atom1 | atom2 | atom3 | atom4 | angle      |
|-------|-------|-------|-------|------------|-------|-------|-------|-------|------------|
| C17   | C11   | C12   | Ti1   | -115.5(3)  | C17   | C11   | C12   | C13   | 176.8(3)   |
| Ti1   | C12   | C13   | Ti1   | -0.000(15) | Ti1   | C12   | C13   | C14   | -63.2(2)   |
| Ti1   | C12   | C13   | C16   | 118.4(3)   | C11   | C12   | C13   | Ti1   | 65.7(2)    |
| C11   | C12   | C13   | C14   | 2.5(4)     | C11   | C12   | C13   | C16   | -175.9(3)  |
| Ti1   | C13   | C14   | Ti1   | -0.000(16) | Ti1   | C13   | C14   | C10   | -63.10(19) |
| Ti1   | C13   | C14   | C15   | 117.8(3)   | C12   | C13   | C14   | Ti1   | 60.9(2)    |
| C12   | C13   | C14   | C10   | -2.2(4)    | C12   | C13   | C14   | C15   | 178.7(3)   |
| C16   | C13   | C14   | Ti1   | -120.7(4)  | C16   | C13   | C14   | C10   | 176.2(3)   |
| C16   | C13   | C14   | C15   | -2.9(6)    | N1    | C18   | C19   | C20   | 54.8(3)    |
| N1    | C18   | C19   | C24   | -129.8(3)  | C18   | C19   | C20   | O2    | -3.0(4)    |
| C18   | C19   | C20   | C21   | 176.9(3)   | C18   | C19   | C24   | C23   | -175.8(3)  |
| C20   | C19   | C24   | C23   | -0.2(5)    | C24   | C19   | C20   | O2    | -178.5(3)  |
| C24   | C19   | C20   | C21   | 1.3(5)     | O2    | C20   | C21   | C22   | 178.5(3)   |
| O2    | C20   | C21   | C26   | 0.0(5)     | C19   | C20   | C21   | C22   | -1.4(5)    |
| C19   | C20   | C21   | C26   | -179.8(3)  | C20   | C21   | C22   | C23   | 0.4(5)     |
| C26   | C21   | C22   | C23   | 178.8(3)   | C21   | C22   | C23   | C24   | 0.6(5)     |
| C21   | C22   | C23   | C25   | -178.6(3)  | C22   | C23   | C24   | C19   | -0.7(5)    |
| C25   | C23   | C24   | C19   | 178.5(3)   | N1    | C27   | C28   | C29   | -53.8(4)   |
| N1    | C27   | C28   | C33   | 128.7(3)   | C27   | C28   | C29   | O3    | 2.4(5)     |
| C27   | C28   | C29   | C30   | -179.6(3)  | C27   | C28   | C33   | C32   | 175.8(3)   |
| C29   | C28   | C33   | C32   | -1.8(5)    | C33   | C28   | C29   | O3    | -180.0(3)  |
| C33   | C28   | C29   | C30   | -1.9(5)    | O3    | C29   | C30   | C31   | -178.1(3)  |
| O3    | C29   | C30   | C35   | 2.6(5)     | C28   | C29   | C30   | C31   | 3.8(5)     |
| C28   | C29   | C30   | C35   | -175.4(3)  | C29   | C30   | C31   | C32   | -2.1(5)    |
| C35   | C30   | C31   | C32   | 177.1(3)   | C30   | C31   | C32   | C33   | -1.4(5)    |
| C30   | C31   | C32   | C34   | 178.1(3)   | C31   | C32   | C33   | C28   | 3.4(5)     |
| C34   | C32   | C33   | C28   | -176.1(3)  | Ti2   | C36   | C37   | Ti2   | -0.000(15) |
| Ti2   | C36   | C37   | C38   | -63.5(2)   | Ti2   | C36   | C37   | C43   | 116.0(3)   |
| Ti2   | C36   | C40   | Ti2   | 0.000(14)  | Ti2   | C36   | C40   | C39   | 64.8(2)    |
| Ti2   | C36   | C40   | C41   | -116.0(3)  | C37   | C36   | C40   | Ti2   | -67.4(3)   |
| C37   | C36   | C40   | C39   | -2.6(4)    | C37   | C36   | C40   | C41   | 176.6(3)   |
| C40   | C36   | C37   | Ti2   | 67.4(3)    | C40   | C36   | C37   | C38   | 3.8(4)     |
| C40   | C36   | C37   | C43   | -176.6(3)  | Ti2   | C37   | C38   | Ti2   | 0.000(13)  |
| Ti2   | C37   | C38   | C39   | -65.8(2)   | C36   | C37   | C38   | Ti2   | 62.2(2)    |
| C36   | C37   | C38   | C39   | -3.6(4)    | C43   | C37   | C38   | Ti2   | -117.4(3)  |
| C43   | C37   | C38   | C39   | 176.8(3)   | Ti2   | C38   | C39   | Ti2   | -0.000(17) |
| Ti2   | C38   | C39   | C40   | -63.4(2)   | Ti2   | C38   | C39   | C42   | 118.4(3)   |

Table S9-8. Torsion angles ( $^{\circ}$ ) (continued)

| atom1 | atom2 | atom3 | atom4 | angle      | atom1 | atom2 | atom3 | atom4 | angle     |
|-------|-------|-------|-------|------------|-------|-------|-------|-------|-----------|
| C37   | C38   | C39   | Ti2   | 65.4(2)    | C37   | C38   | C39   | C40   | 2.0(4)    |
| C37   | C38   | C39   | C42   | -176.3(3)  | Ti2   | C39   | C40   | Ti2   | 0.000(18) |
| Ti2   | C39   | C40   | C36   | -62.50(19) | Ti2   | C39   | C40   | C41   | 118.3(3)  |
| C38   | C39   | C40   | Ti2   | 62.9(2)    | C38   | C39   | C40   | C36   | 0.4(4)    |
| C38   | C39   | C40   | C41   | -178.8(3)  | C42   | C39   | C40   | Ti2   | -118.9(4) |
| C42   | C39   | C40   | C36   | 178.6(3)   | C42   | C39   | C40   | C41   | -0.6(6)   |

Table S9-9. Intramolecular contacts less than 3.60 Å

| atom | atom | distance | atom | atom | distance |
|------|------|----------|------|------|----------|
| Ti2  | N1   | 3.485(2) | Cl2  | C16  | 3.298(4) |
| Cl3  | C42  | 3.340(4) | O1   | C1   | 2.896(3) |
| O1   | C9   | 2.797(4) | O1   | C17  | 3.424(4) |
| O1   | C28  | 3.572(3) | O1   | C33  | 3.228(4) |
| O2   | N1   | 2.886(3) | O2   | C18  | 2.851(4) |
| O2   | C26  | 2.822(5) | O2   | C41  | 3.140(4) |
| O3   | N1   | 2.884(3) | O3   | C2   | 3.577(3) |
| O3   | C7   | 3.156(4) | O3   | C27  | 2.856(4) |
| O3   | C35  | 2.792(4) | O3   | C43  | 3.080(5) |
| N1   | C3   | 3.568(4) | N1   | C7   | 3.037(5) |
| N1   | C20  | 3.052(4) | N1   | C29  | 3.054(4) |
| C1   | C17  | 3.520(4) | C1   | C19  | 3.055(4) |
| C1   | C28  | 3.087(5) | C2   | C5   | 2.784(5) |
| C2   | C27  | 3.120(5) | C2   | C28  | 3.015(5) |
| C2   | C29  | 3.305(5) | C3   | C6   | 2.786(5) |
| C3   | C28  | 3.314(5) | C3   | C33  | 3.336(5) |
| C4   | C7   | 2.781(4) | C7   | C28  | 3.533(6) |
| C7   | C29  | 3.243(5) | C15  | C16  | 3.190(6) |
| C19  | C22  | 2.786(5) | C20  | C23  | 2.797(5) |
| C20  | C41  | 3.425(5) | C21  | C24  | 2.779(5) |
| C28  | C31  | 2.778(4) | C29  | C32  | 2.786(4) |
| C29  | C43  | 3.279(5) | C30  | C33  | 2.774(5) |
| C41  | C42  | 3.227(6) |      |      |          |

Table S9-10. Intramolecular contacts less than 3.60 Å involving hydrogens

| atom | atom | distance | atom | atom | distance |
|------|------|----------|------|------|----------|
| Ti1  | H1A  | 3.305    | Ti1  | H9A  | 2.997    |
| Ti1  | H15B | 3.383    | Ti1  | H16C | 3.436    |
| Ti1  | H17B | 3.295    | Ti1  | H33  | 3.581    |
| Ti2  | H7   | 3.463    | Ti2  | H41B | 3.376    |
| Ti2  | H42C | 3.407    | Ti2  | H43C | 3.357    |
| Cl1  | H1A  | 3.146    | Cl1  | H10  | 3.092    |
| Cl1  | H27B | 3.030    | Cl1  | H33  | 3.083    |
| Cl2  | H9A  | 2.909    | Cl2  | H15B | 2.986    |
| Cl2  | H16C | 2.644    | Cl2  | H34B | 2.947    |
| Cl3  | H8B  | 2.988    | Cl3  | H26B | 3.369    |
| Cl3  | H35C | 3.461    | Cl3  | H38  | 3.378    |
| Cl3  | H42A | 3.265    | Cl3  | H42C | 3.013    |
| O1   | H1A  | 2.444    | O1   | H1B  | 3.572    |
| O1   | H9A  | 2.323    | O1   | H9B  | 3.417    |
| O1   | H9C  | 3.493    | O1   | H12  | 3.083    |
| O1   | H17A | 3.389    | O1   | H17B | 3.223    |
| O1   | H27B | 3.540    | O1   | H33  | 3.019    |
| O2   | H7   | 2.936    | O2   | H18B | 2.906    |
| O2   | H26B | 2.781    | O2   | H26C | 2.781    |
| O2   | H36  | 3.474    | O2   | H41A | 3.276    |
| O2   | H41B | 2.739    | O3   | H7   | 2.972    |
| O3   | H8B  | 3.531    | O3   | H27A | 2.918    |
| O3   | H35B | 2.728    | O3   | H35C | 2.761    |
| O3   | H36  | 3.585    | O3   | H43A | 3.301    |
| O3   | H43C | 2.614    | N1   | H7   | 2.887    |
| C1   | H7   | 2.642    | C1   | H17A | 3.420    |
| C1   | H17B | 2.788    | C1   | H18A | 2.559    |
| C1   | H18B | 3.264    | C1   | H27A | 3.275    |
| C1   | H27B | 2.578    | C2   | H17A | 3.542    |
| C2   | H17B | 3.513    | C2   | H27B | 3.403    |
| C3   | H1A  | 2.601    | C3   | H1B  | 3.176    |
| C3   | H5   | 3.241    | C3   | H7   | 3.242    |
| C3   | H9A  | 2.553    | C3   | H9B  | 3.127    |
| C3   | H9C  | 3.154    | C3   | H12  | 3.526    |
| C3   | H17A | 3.532    | C3   | H33  | 3.507    |
| C5   | H7   | 3.237    | C5   | H8A  | 2.563    |
| C5   | H8B  | 3.143    | C5   | H8C  | 3.145    |

Table S9-10. Intramolecular contacts less than 3.60 Å involving hydrogens (continued)

| atom | atom | distance | atom | atom | distance |
|------|------|----------|------|------|----------|
| C5   | H9A  | 3.313    | C5   | H9B  | 2.778    |
| C5   | H9C  | 2.778    | C6   | H35C | 3.111    |
| C7   | H1A  | 3.312    | C7   | H1B  | 2.770    |
| C7   | H5   | 3.237    | C7   | H8A  | 3.319    |
| C7   | H8B  | 2.781    | C7   | H8C  | 2.781    |
| C8   | H5   | 2.663    | C8   | H7   | 2.675    |
| C8   | H35C | 2.893    | C9   | H5   | 2.674    |
| C10  | H12  | 3.229    | C10  | H15A | 2.687    |
| C10  | H15B | 3.226    | C10  | H15C | 3.216    |
| C10  | H17A | 3.367    | C10  | H17B | 2.866    |
| C10  | H17C | 2.866    | C11  | H1A  | 3.547    |
| C12  | H9A  | 3.393    | C12  | H10  | 3.231    |
| C12  | H16A | 2.664    | C12  | H16B | 3.196    |
| C12  | H16C | 3.215    | C12  | H17A | 2.679    |
| C12  | H17B | 3.222    | C12  | H17C | 3.206    |
| C13  | H10  | 3.243    | C13  | H15A | 3.374    |
| C13  | H15B | 2.866    | C13  | H15C | 2.866    |
| C14  | H12  | 3.248    | C14  | H16A | 3.368    |
| C14  | H16B | 2.861    | C14  | H16C | 2.861    |
| C15  | H10  | 2.920    | C15  | H16B | 3.176    |
| C15  | H16C | 3.145    | C16  | H12  | 2.900    |
| C16  | H15B | 3.178    | C16  | H15C | 3.147    |
| C17  | H1A  | 2.995    | C17  | H1B  | 3.273    |
| C17  | H10  | 2.909    | C17  | H12  | 2.914    |
| C18  | H1A  | 2.789    | C18  | H1B  | 2.479    |
| C18  | H24  | 2.661    | C18  | H27A | 2.470    |
| C18  | H27B | 2.708    | C18  | H36  | 3.529    |
| C19  | H1B  | 2.627    | C20  | H1B  | 3.323    |
| C20  | H7   | 3.357    | C20  | H18A | 3.318    |
| C20  | H18B | 2.808    | C20  | H22  | 3.256    |
| C20  | H24  | 3.249    | C20  | H26A | 3.315    |
| C20  | H26B | 2.768    | C20  | H26C | 2.768    |
| C20  | H41A | 3.322    | C20  | H41B | 2.870    |
| C21  | H41B | 2.958    | C22  | H24  | 3.232    |
| C22  | H25A | 3.311    | C22  | H25B | 2.774    |
| C22  | H25C | 2.774    | C22  | H26A | 2.567    |
| C22  | H26B | 3.157    | C22  | H26C | 3.140    |



Table S9-10. Intramolecular contacts less than 3.60 Å involving hydrogens (continued)

| atom | atom | distance | atom | atom | distance |
|------|------|----------|------|------|----------|
| C24  | H1B  | 3.162    | C24  | H18A | 2.551    |
| C24  | H18B | 3.073    | C24  | H22  | 3.234    |
| C24  | H25A | 2.568    | C24  | H25B | 3.152    |
| C24  | H25C | 3.143    | C25  | H22  | 2.667    |
| C25  | H24  | 2.666    | C26  | H22  | 2.673    |
| C26  | H41B | 2.972    | C27  | H1A  | 2.545    |
| C27  | H1B  | 3.267    | C27  | H18A | 2.712    |
| C27  | H18B | 2.469    | C27  | H33  | 2.664    |
| C27  | H36  | 3.595    | C28  | H1A  | 3.255    |
| C28  | H43A | 3.470    | C28  | H43C | 3.392    |
| C29  | H7   | 3.448    | C29  | H27A | 2.813    |
| C29  | H27B | 3.319    | C29  | H31  | 3.243    |
| C29  | H33  | 3.246    | C29  | H35A | 3.302    |
| C29  | H35B | 2.749    | C29  | H35C | 2.749    |
| C29  | H43A | 3.296    | C29  | H43C | 2.616    |
| C30  | H43C | 2.851    | C31  | H33  | 3.232    |
| C31  | H34A | 2.567    | C31  | H34B | 3.146    |
| C31  | H34C | 3.142    | C31  | H35A | 2.585    |
| C31  | H35B | 3.159    | C31  | H35C | 3.150    |
| C33  | H27A | 3.080    | C33  | H27B | 2.554    |
| C33  | H31  | 3.233    | C33  | H34A | 3.311    |
| C33  | H34B | 2.770    | C33  | H34C | 2.770    |
| C34  | H31  | 2.669    | C34  | H33  | 2.663    |
| C35  | H8B  | 3.205    | C35  | H31  | 2.689    |
| C35  | H43C | 3.171    | C36  | H18B | 3.229    |
| C36  | H27A | 3.245    | C36  | H38  | 3.224    |
| C36  | H41A | 2.669    | C36  | H41B | 3.218    |
| C36  | H41C | 3.208    | C36  | H43A | 2.682    |
| C36  | H43B | 3.216    | C36  | H43C | 3.211    |
| C38  | H36  | 3.221    | C38  | H42A | 2.639    |
| C38  | H42B | 3.183    | C38  | H42C | 3.204    |
| C38  | H43A | 3.358    | C38  | H43B | 2.855    |
| C38  | H43C | 2.855    | C39  | H36  | 3.235    |
| C39  | H41A | 3.373    | C39  | H41B | 2.876    |
| C39  | H41C | 2.876    | C40  | H38  | 3.242    |
| C40  | H42A | 3.366    | C40  | H42B | 2.870    |
| C40  | H42C | 2.870    | C41  | H26C | 3.184    |

Table S9-10. Intramolecular contacts less than 3.60 Å involving hydrogens (continued)

| atom | atom | distance | atom | atom | distance |
|------|------|----------|------|------|----------|
| C41  | H36  | 2.902    | C41  | H42B | 3.209    |
| C41  | H42C | 3.202    | C42  | H38  | 2.875    |
| C42  | H41B | 3.210    | C42  | H41C | 3.204    |
| C43  | H27A | 3.549    | C43  | H35B | 3.469    |
| C43  | H36  | 2.915    | C43  | H38  | 2.896    |
| H1A  | H7   | 3.583    | H1A  | H17A | 3.139    |
| H1A  | H17B | 2.188    | H1A  | H18A | 2.580    |
| H1A  | H18B | 3.583    | H1A  | H27A | 3.419    |
| H1A  | H27B | 2.285    | H1A  | H33  | 3.557    |
| H1B  | H7   | 2.690    | H1B  | H17A | 3.091    |
| H1B  | H17B | 2.582    | H1B  | H18A | 2.564    |
| H1B  | H18B | 3.438    | H1B  | H24  | 3.275    |
| H1B  | H27B | 3.403    | H5   | H8A  | 2.338    |
| H5   | H8B  | 3.326    | H5   | H8C  | 3.323    |
| H5   | H9B  | 2.734    | H5   | H9C  | 2.713    |
| H7   | H8B  | 2.729    | H7   | H8C  | 2.717    |
| H8A  | H35C | 3.073    | H8B  | H35C | 2.235    |
| H9A  | H12  | 3.189    | H9A  | H16A | 3.345    |
| H9A  | H16C | 3.570    | H9A  | H34B | 3.366    |
| H9B  | H34B | 3.228    | H9C  | H12  | 3.539    |
| H10  | H15A | 2.641    | H10  | H15B | 3.597    |
| H10  | H15C | 3.544    | H10  | H17B | 2.985    |
| H10  | H17C | 2.958    | H12  | H16A | 2.612    |
| H12  | H16B | 3.520    | H12  | H16C | 3.582    |
| H12  | H17A | 2.633    | H12  | H17B | 3.596    |
| H12  | H17C | 3.532    | H15B | H16B | 3.296    |
| H15B | H16C | 2.832    | H15C | H16B | 2.833    |
| H15C | H16C | 3.209    | H18A | H24  | 2.326    |
| H18A | H27A | 2.866    | H18A | H27B | 2.649    |
| H18B | H24  | 3.237    | H18B | H27A | 2.129    |
| H18B | H27B | 2.859    | H18B | H36  | 2.643    |
| H18B | H41A | 3.236    | H22  | H25A | 3.595    |
| H22  | H25B | 2.709    | H22  | H25C | 2.721    |
| H22  | H26A | 2.348    | H22  | H26B | 3.343    |
| H22  | H26C | 3.324    | H24  | H25A | 2.342    |
| H24  | H25B | 3.329    | H24  | H25C | 3.326    |
| H26B | H41B | 3.593    | H26C | H41B | 2.237    |

Table S9-10. Intramolecular contacts less than 3.60 Å involving hydrogens (continued)

| atom | atom | distance | atom | atom | distance |
|------|------|----------|------|------|----------|
| H26C | H42C | 2.796    | H27A | H33  | 3.250    |
| H27A | H36  | 2.719    | H27A | H43A | 2.923    |
| H27B | H33  | 2.330    | H31  | H34A | 2.347    |
| H31  | H34B | 3.327    | H31  | H34C | 3.332    |
| H31  | H35A | 2.376    | H31  | H35B | 3.346    |
| H31  | H35C | 3.353    | H33  | H34A | 3.592    |
| H33  | H34B | 2.692    | H33  | H34C | 2.726    |
| H35B | H38  | 3.405    | H35B | H43C | 2.580    |
| H36  | H41A | 2.612    | H36  | H41B | 3.581    |
| H36  | H41C | 3.525    | H36  | H43A | 2.636    |
| H36  | H43B | 3.549    | H36  | H43C | 3.582    |
| H38  | H42A | 2.574    | H38  | H42B | 3.499    |
| H38  | H42C | 3.557    | H38  | H43B | 2.941    |
| H38  | H43C | 2.974    | H41B | H42B | 3.311    |
| H41B | H42C | 2.889    | H41C | H42B | 2.889    |
| H41C | H42C | 3.293    |      |      |          |

Table S9-11. Intermolecular contacts less than 3.60 Å

| atom | atom             | distance | atom | atom             | distance |
|------|------------------|----------|------|------------------|----------|
| C5   | C18 <sup>1</sup> | 3.589(6) | C6   | C18 <sup>1</sup> | 3.491(5) |
| C8   | C18 <sup>1</sup> | 3.571(5) | C12  | C33 <sup>1</sup> | 3.529(6) |
| C16  | C42 <sup>2</sup> | 3.577(5) | C17  | C33 <sup>1</sup> | 3.539(5) |
| C18  | C5 <sup>3</sup>  | 3.589(6) | C18  | C6 <sup>3</sup>  | 3.491(5) |
| C18  | C8 <sup>3</sup>  | 3.571(5) | C33  | C12 <sup>3</sup> | 3.529(6) |
| C33  | C17 <sup>3</sup> | 3.539(5) | C35  | C42 <sup>4</sup> | 3.497(5) |
| C42  | C16 <sup>5</sup> | 3.577(5) | C42  | C35 <sup>4</sup> | 3.497(5) |

Symmetry Operators:

- |                |                    |
|----------------|--------------------|
| (1) X,-Y+1,Z   | (2) X-1,Y,Z-1      |
| (3) X,-Y+1,Z+1 | (4) -X+1,-Y+1,-Z+1 |
| (5) X+1,Y,Z+1  |                    |

Table S9-12. Intermolecular contacts less than 3.60 Å involving hydrogens

| atom | atom               | distance | atom | atom               | distance |
|------|--------------------|----------|------|--------------------|----------|
| Cl1  | H9C <sup>1</sup>   | 3.090    | Cl1  | H12 <sup>1</sup>   | 2.956    |
| Cl1  | H16A <sup>1</sup>  | 2.758    | Cl1  | H31 <sup>2</sup>   | 2.802    |
| Cl1  | H35A <sup>2</sup>  | 2.903    | Cl2  | H26A <sup>3</sup>  | 3.084    |
| Cl3  | H15A <sup>4</sup>  | 3.542    | Cl3  | H15C <sup>4</sup>  | 3.436    |
| Cl3  | H38 <sup>5</sup>   | 2.868    | Cl3  | H42A <sup>5</sup>  | 3.183    |
| C1   | H43A <sup>6</sup>  | 3.373    | C2   | H27A <sup>6</sup>  | 3.459    |
| C2   | H36 <sup>6</sup>   | 3.341    | C3   | H27A <sup>6</sup>  | 3.579    |
| C4   | H9B <sup>7</sup>   | 3.325    | C5   | H9B <sup>7</sup>   | 3.026    |
| C5   | H18A <sup>6</sup>  | 3.098    | C5   | H18B <sup>6</sup>  | 3.121    |
| C6   | H18A <sup>6</sup>  | 3.355    | C6   | H18B <sup>6</sup>  | 2.731    |
| C6   | H36 <sup>6</sup>   | 3.337    | C7   | H18B <sup>6</sup>  | 3.210    |
| C7   | H27A <sup>6</sup>  | 3.473    | C7   | H36 <sup>6</sup>   | 2.689    |
| C8   | H18A <sup>6</sup>  | 3.541    | C8   | H18B <sup>6</sup>  | 2.905    |
| C8   | H41A <sup>6</sup>  | 3.051    | C9   | H5 <sup>7</sup>    | 3.299    |
| C9   | H9B <sup>7</sup>   | 2.966    | C9   | H31 <sup>7</sup>   | 3.198    |
| C10  | H35B <sup>2</sup>  | 3.593    | C10  | H43B <sup>2</sup>  | 3.583    |
| C10  | H43C <sup>2</sup>  | 3.242    | C11  | H17C <sup>8</sup>  | 3.555    |
| C11  | H33 <sup>6</sup>   | 3.476    | C11  | H34C <sup>6</sup>  | 3.397    |
| C12  | H33 <sup>6</sup>   | 2.882    | C12  | H34C <sup>6</sup>  | 3.440    |
| C15  | H25B <sup>8</sup>  | 3.339    | C15  | H26B <sup>3</sup>  | 3.376    |
| C15  | H26C <sup>3</sup>  | 3.531    | C15  | H35B <sup>2</sup>  | 3.157    |
| C15  | H41C <sup>9</sup>  | 3.553    | C15  | H42C <sup>3</sup>  | 3.324    |
| C15  | H43C <sup>2</sup>  | 3.559    | C16  | H41C <sup>9</sup>  | 3.225    |
| C16  | H42B <sup>9</sup>  | 2.787    | C16  | H42C <sup>9</sup>  | 3.511    |
| C17  | H17C <sup>8</sup>  | 3.002    | C17  | H33 <sup>6</sup>   | 3.569    |
| C17  | H43A <sup>6</sup>  | 3.025    | C18  | H8A <sup>1</sup>   | 3.568    |
| C18  | H8C <sup>1</sup>   | 3.129    | C18  | H34A <sup>2</sup>  | 3.520    |
| C19  | H8C <sup>1</sup>   | 3.228    | C21  | H25C <sup>10</sup> | 3.294    |
| C22  | H25C <sup>10</sup> | 3.115    | C23  | H25C <sup>10</sup> | 3.569    |
| C23  | H43B <sup>6</sup>  | 2.947    | C24  | H8A <sup>1</sup>   | 3.559    |
| C24  | H8C <sup>1</sup>   | 3.584    | C24  | H43B <sup>6</sup>  | 3.035    |
| C25  | H15C <sup>8</sup>  | 3.222    | C25  | H41B <sup>10</sup> | 3.406    |
| C25  | H43B <sup>6</sup>  | 3.145    | C26  | H15B <sup>4</sup>  | 2.898    |
| C26  | H16C <sup>4</sup>  | 3.585    | C26  | H41C <sup>6</sup>  | 3.158    |
| C27  | H12 <sup>1</sup>   | 3.483    | C27  | H17A <sup>1</sup>  | 3.236    |
| C28  | H12 <sup>1</sup>   | 3.570    | C28  | H17A <sup>1</sup>  | 2.968    |
| C30  | H10 <sup>11</sup>  | 2.922    | C31  | H9C <sup>7</sup>   | 3.002    |

Table S9-12. Intermolecular contacts less than 3.60 Å involving hydrogens (continued)

| atom | atom               | distance | atom | atom               | distance |
|------|--------------------|----------|------|--------------------|----------|
| C31  | H10 <sup>11</sup>  | 2.872    | C32  | H17A <sup>1</sup>  | 3.529    |
| C32  | H17C <sup>1</sup>  | 3.544    | C33  | H12 <sup>1</sup>   | 2.920    |
| C33  | H17A <sup>1</sup>  | 2.909    | C33  | H17C <sup>1</sup>  | 3.541    |
| C34  | H5 <sup>7</sup>    | 3.454    | C34  | H18A <sup>11</sup> | 3.422    |
| C34  | H24 <sup>11</sup>  | 3.019    | C35  | H10 <sup>11</sup>  | 3.136    |
| C35  | H15A <sup>11</sup> | 3.004    | C35  | H42A <sup>5</sup>  | 2.888    |
| C35  | H42B <sup>5</sup>  | 3.517    | C35  | H42C <sup>5</sup>  | 3.561    |
| C36  | H7 <sup>1</sup>    | 3.186    | C38  | H22 <sup>1</sup>   | 3.475    |
| C38  | H25B <sup>1</sup>  | 3.569    | C40  | H26B <sup>1</sup>  | 3.168    |
| C41  | H8C <sup>1</sup>   | 3.116    | C41  | H16B <sup>12</sup> | 3.218    |
| C41  | H25B <sup>10</sup> | 3.563    | C41  | H25C <sup>10</sup> | 3.251    |
| C41  | H26B <sup>1</sup>  | 2.993    | C42  | H15A <sup>4</sup>  | 3.567    |
| C42  | H16A <sup>12</sup> | 3.514    | C42  | H16B <sup>12</sup> | 3.416    |
| C42  | H16C <sup>12</sup> | 3.216    | C42  | H35A <sup>5</sup>  | 3.389    |
| C42  | H35B <sup>5</sup>  | 3.247    | C42  | H35C <sup>5</sup>  | 3.275    |
| C43  | H1B <sup>1</sup>   | 3.247    | C43  | H10 <sup>11</sup>  | 3.341    |
| C43  | H15A <sup>11</sup> | 3.568    | C43  | H17A <sup>1</sup>  | 3.328    |
| H1A  | H34A <sup>2</sup>  | 3.532    | H1B  | C43 <sup>6</sup>   | 3.247    |
| H1B  | H36 <sup>6</sup>   | 3.112    | H1B  | H43A <sup>6</sup>  | 2.483    |
| H1B  | H43B <sup>6</sup>  | 3.302    | H5   | C9 <sup>7</sup>    | 3.299    |
| H5   | C34 <sup>7</sup>   | 3.454    | H5   | H9A <sup>7</sup>   | 3.515    |
| H5   | H9B <sup>7</sup>   | 2.408    | H5   | H18A <sup>6</sup>  | 2.934    |
| H5   | H18B <sup>6</sup>  | 3.354    | H5   | H34A <sup>7</sup>  | 2.933    |
| H5   | H34B <sup>7</sup>  | 3.126    | H7   | C36 <sup>6</sup>   | 3.186    |
| H7   | H18B <sup>6</sup>  | 3.488    | H7   | H36 <sup>6</sup>   | 2.304    |
| H7   | H41A <sup>6</sup>  | 3.348    | H8A  | C18 <sup>6</sup>   | 3.568    |
| H8A  | C24 <sup>6</sup>   | 3.559    | H8A  | H18A <sup>6</sup>  | 3.334    |
| H8A  | H18B <sup>6</sup>  | 3.143    | H8A  | H24 <sup>6</sup>   | 3.306    |
| H8B  | H41A <sup>6</sup>  | 3.248    | H8B  | H42A <sup>5</sup>  | 3.310    |
| H8C  | C18 <sup>6</sup>   | 3.129    | H8C  | C19 <sup>6</sup>   | 3.228    |
| H8C  | C24 <sup>6</sup>   | 3.584    | H8C  | C41 <sup>6</sup>   | 3.116    |
| H8C  | H18A <sup>6</sup>  | 3.355    | H8C  | H18B <sup>6</sup>  | 2.430    |
| H8C  | H36 <sup>6</sup>   | 3.096    | H8C  | H41A <sup>6</sup>  | 2.144    |
| H8C  | H41B <sup>6</sup>  | 3.505    | H9A  | H5 <sup>7</sup>    | 3.515    |
| H9B  | C4 <sup>7</sup>    | 3.325    | H9B  | C5 <sup>7</sup>    | 3.026    |
| H9B  | C9 <sup>7</sup>    | 2.966    | H9B  | H5 <sup>7</sup>    | 2.408    |
| H9B  | H9B <sup>7</sup>   | 2.235    | H9B  | H9C <sup>7</sup>   | 3.130    |

Table S9-12. Intermolecular contacts less than 3.60 Å involving hydrogens (continued)

| atom | atom              | distance | atom | atom              | distance |
|------|-------------------|----------|------|-------------------|----------|
| H9B  | H31 <sup>7</sup>  | 3.378    | H9C  | Cl1 <sup>6</sup>  | 3.090    |
| H9C  | C31 <sup>7</sup>  | 3.002    | H9C  | H9B <sup>7</sup>  | 3.130    |
| H9C  | H27B <sup>6</sup> | 3.588    | H9C  | H31 <sup>7</sup>  | 2.283    |
| H9C  | H34A <sup>7</sup> | 3.313    | H9C  | H35A <sup>7</sup> | 3.162    |
| H10  | C30 <sup>2</sup>  | 2.922    | H10  | C31 <sup>2</sup>  | 2.872    |
| H10  | C35 <sup>2</sup>  | 3.136    | H10  | C43 <sup>2</sup>  | 3.341    |
| H10  | H17C <sup>8</sup> | 3.278    | H10  | H31 <sup>2</sup>  | 2.830    |
| H10  | H35A <sup>2</sup> | 3.063    | H10  | H35B <sup>2</sup> | 2.902    |
| H10  | H43B <sup>2</sup> | 3.344    | H10  | H43C <sup>2</sup> | 2.596    |
| H12  | Cl1 <sup>6</sup>  | 2.956    | H12  | C27 <sup>6</sup>  | 3.483    |
| H12  | C28 <sup>6</sup>  | 3.570    | H12  | C33 <sup>6</sup>  | 2.920    |
| H12  | H27B <sup>6</sup> | 2.806    | H12  | H33 <sup>6</sup>  | 2.180    |
| H12  | H34C <sup>6</sup> | 3.538    | H15A | Cl3 <sup>3</sup>  | 3.542    |
| H15A | C35 <sup>2</sup>  | 3.004    | H15A | C42 <sup>3</sup>  | 3.567    |
| H15A | C43 <sup>2</sup>  | 3.568    | H15A | H35A <sup>2</sup> | 3.030    |
| H15A | H35B <sup>2</sup> | 2.192    | H15A | H38 <sup>2</sup>  | 3.169    |
| H15A | H42A <sup>3</sup> | 3.376    | H15A | H42C <sup>3</sup> | 2.882    |
| H15A | H43B <sup>2</sup> | 3.392    | H15A | H43C <sup>2</sup> | 2.948    |
| H15B | C26 <sup>3</sup>  | 2.898    | H15B | H26A <sup>3</sup> | 2.907    |
| H15B | H26B <sup>3</sup> | 2.682    | H15B | H26C <sup>3</sup> | 2.616    |
| H15B | H41C <sup>9</sup> | 3.391    | H15B | H42C <sup>3</sup> | 2.893    |
| H15C | Cl3 <sup>3</sup>  | 3.436    | H15C | C25 <sup>8</sup>  | 3.222    |
| H15C | H25A <sup>8</sup> | 3.208    | H15C | H25B <sup>8</sup> | 2.424    |
| H15C | H26B <sup>3</sup> | 3.198    | H15C | H38 <sup>2</sup>  | 3.262    |
| H15C | H41C <sup>9</sup> | 2.873    | H15C | H43B <sup>2</sup> | 3.338    |
| H16A | Cl1 <sup>6</sup>  | 2.758    | H16A | C42 <sup>9</sup>  | 3.514    |
| H16A | H35A <sup>7</sup> | 3.070    | H16A | H42B <sup>9</sup> | 2.833    |
| H16A | H42C <sup>9</sup> | 3.333    | H16B | C41 <sup>9</sup>  | 3.218    |
| H16B | C42 <sup>9</sup>  | 3.416    | H16B | H25A <sup>8</sup> | 3.040    |
| H16B | H25B <sup>8</sup> | 3.532    | H16B | H41B <sup>9</sup> | 3.022    |
| H16B | H41C <sup>9</sup> | 2.560    | H16B | H42B <sup>9</sup> | 2.789    |
| H16B | H42C <sup>9</sup> | 3.197    | H16C | C26 <sup>3</sup>  | 3.585    |
| H16C | C42 <sup>9</sup>  | 3.216    | H16C | H26A <sup>3</sup> | 2.881    |
| H16C | H26B <sup>3</sup> | 3.472    | H16C | H41C <sup>9</sup> | 3.023    |
| H16C | H42B <sup>9</sup> | 2.291    | H16C | H42C <sup>9</sup> | 3.421    |
| H17A | C27 <sup>6</sup>  | 3.236    | H17A | C28 <sup>6</sup>  | 2.968    |
| H17A | C32 <sup>6</sup>  | 3.529    | H17A | C33 <sup>6</sup>  | 2.909    |

Table S9-12. Intermolecular contacts less than 3.60 Å involving hydrogens (continued)

| atom | atom               | distance | atom | atom               | distance |
|------|--------------------|----------|------|--------------------|----------|
| H17A | C43 <sup>6</sup>   | 3.328    | H17A | H27A <sup>6</sup>  | 2.843    |
| H17A | H27B <sup>6</sup>  | 3.302    | H17A | H33 <sup>6</sup>   | 3.001    |
| H17A | H43A <sup>6</sup>  | 2.491    | H17A | H43C <sup>6</sup>  | 3.379    |
| H17B | H17C <sup>8</sup>  | 3.362    | H17B | H34A <sup>2</sup>  | 3.224    |
| H17B | H34C <sup>2</sup>  | 3.341    | H17B | H43A <sup>6</sup>  | 2.952    |
| H17C | C11 <sup>8</sup>   | 3.555    | H17C | C17 <sup>8</sup>   | 3.002    |
| H17C | C32 <sup>6</sup>   | 3.544    | H17C | C33 <sup>6</sup>   | 3.541    |
| H17C | H10 <sup>8</sup>   | 3.278    | H17C | H17B <sup>8</sup>  | 3.362    |
| H17C | H17C <sup>8</sup>  | 2.080    | H17C | H34C <sup>2</sup>  | 3.507    |
| H17C | H34C <sup>6</sup>  | 3.321    | H17C | H43A <sup>6</sup>  | 3.158    |
| H18A | C5 <sup>1</sup>    | 3.098    | H18A | C6 <sup>1</sup>    | 3.355    |
| H18A | C8 <sup>1</sup>    | 3.541    | H18A | C34 <sup>2</sup>   | 3.422    |
| H18A | H5 <sup>1</sup>    | 2.934    | H18A | H8A <sup>1</sup>   | 3.334    |
| H18A | H8C <sup>1</sup>   | 3.355    | H18A | H34A <sup>2</sup>  | 2.554    |
| H18B | C5 <sup>1</sup>    | 3.121    | H18B | C6 <sup>1</sup>    | 2.731    |
| H18B | C7 <sup>1</sup>    | 3.210    | H18B | C8 <sup>1</sup>    | 2.905    |
| H18B | H5 <sup>1</sup>    | 3.354    | H18B | H7 <sup>1</sup>    | 3.488    |
| H18B | H8A <sup>1</sup>   | 3.143    | H18B | H8C <sup>1</sup>   | 2.430    |
| H22  | C38 <sup>6</sup>   | 3.475    | H22  | H25C <sup>10</sup> | 3.221    |
| H22  | H38 <sup>6</sup>   | 3.502    | H24  | C34 <sup>2</sup>   | 3.019    |
| H24  | H8A <sup>1</sup>   | 3.306    | H24  | H34A <sup>2</sup>  | 2.751    |
| H24  | H34B <sup>2</sup>  | 2.973    | H24  | H34C <sup>2</sup>  | 2.820    |
| H24  | H43B <sup>6</sup>  | 3.098    | H25A | H15C <sup>8</sup>  | 3.208    |
| H25A | H16B <sup>8</sup>  | 3.040    | H25A | H34C <sup>2</sup>  | 3.502    |
| H25A | H41B <sup>10</sup> | 3.493    | H25A | H43B <sup>6</sup>  | 3.169    |
| H25B | C15 <sup>8</sup>   | 3.339    | H25B | C38 <sup>6</sup>   | 3.569    |
| H25B | C41 <sup>10</sup>  | 3.563    | H25B | H15C <sup>8</sup>  | 2.424    |
| H25B | H16B <sup>8</sup>  | 3.532    | H25B | H38 <sup>6</sup>   | 3.064    |
| H25B | H41A <sup>10</sup> | 3.386    | H25B | H41B <sup>10</sup> | 3.449    |
| H25B | H41C <sup>10</sup> | 3.265    | H25B | H43B <sup>6</sup>  | 2.812    |
| H25C | C21 <sup>10</sup>  | 3.294    | H25C | C22 <sup>10</sup>  | 3.115    |
| H25C | C23 <sup>10</sup>  | 3.569    | H25C | C41 <sup>10</sup>  | 3.251    |
| H25C | H22 <sup>10</sup>  | 3.221    | H25C | H26C <sup>10</sup> | 3.465    |
| H25C | H41A <sup>10</sup> | 3.103    | H25C | H41B <sup>10</sup> | 2.770    |
| H25C | H41C <sup>10</sup> | 3.363    | H26A | Cl2 <sup>4</sup>   | 3.084    |
| H26A | H15B <sup>4</sup>  | 2.907    | H26A | H16C <sup>4</sup>  | 2.881    |
| H26A | H41C <sup>6</sup>  | 3.180    | H26A | H42B <sup>6</sup>  | 3.079    |



Table S9-12. Intermolecular contacts less than 3.60 Å involving hydrogens (continued)

| atom | atom               | distance | atom | atom               | distance |
|------|--------------------|----------|------|--------------------|----------|
| H26B | C15 <sup>4</sup>   | 3.376    | H26B | C40 <sup>6</sup>   | 3.168    |
| H26B | C41 <sup>6</sup>   | 2.993    | H26B | H15B <sup>4</sup>  | 2.682    |
| H26B | H15C <sup>4</sup>  | 3.198    | H26B | H16C <sup>4</sup>  | 3.472    |
| H26B | H41A <sup>6</sup>  | 3.179    | H26B | H41C <sup>6</sup>  | 2.337    |
| H26C | C15 <sup>4</sup>   | 3.531    | H26C | H15B <sup>4</sup>  | 2.616    |
| H26C | H25C <sup>10</sup> | 3.465    | H27A | C2 <sup>1</sup>    | 3.459    |
| H27A | C3 <sup>1</sup>    | 3.579    | H27A | C7 <sup>1</sup>    | 3.473    |
| H27A | H17A <sup>1</sup>  | 2.843    | H27B | H9C <sup>1</sup>   | 3.588    |
| H27B | H12 <sup>1</sup>   | 2.806    | H27B | H17A <sup>1</sup>  | 3.302    |
| H31  | Cl1 <sup>11</sup>  | 2.802    | H31  | C9 <sup>7</sup>    | 3.198    |
| H31  | H9B <sup>7</sup>   | 3.378    | H31  | H9C <sup>7</sup>   | 2.283    |
| H31  | H10 <sup>11</sup>  | 2.830    | H33  | C11 <sup>1</sup>   | 3.476    |
| H33  | C12 <sup>1</sup>   | 2.882    | H33  | C17 <sup>1</sup>   | 3.569    |
| H33  | H12 <sup>1</sup>   | 2.180    | H33  | H17A <sup>1</sup>  | 3.001    |
| H34A | C18 <sup>11</sup>  | 3.520    | H34A | H1A <sup>11</sup>  | 3.532    |
| H34A | H5 <sup>7</sup>    | 2.933    | H34A | H9C <sup>7</sup>   | 3.313    |
| H34A | H17B <sup>11</sup> | 3.224    | H34A | H18A <sup>11</sup> | 2.554    |
| H34A | H24 <sup>11</sup>  | 2.751    | H34B | H5 <sup>7</sup>    | 3.126    |
| H34B | H24 <sup>11</sup>  | 2.973    | H34C | C11 <sup>1</sup>   | 3.397    |
| H34C | C12 <sup>1</sup>   | 3.440    | H34C | H12 <sup>1</sup>   | 3.538    |
| H34C | H17B <sup>11</sup> | 3.341    | H34C | H17C <sup>11</sup> | 3.507    |
| H34C | H17C <sup>1</sup>  | 3.321    | H34C | H24 <sup>11</sup>  | 2.820    |
| H34C | H25A <sup>11</sup> | 3.502    | H35A | Cl1 <sup>11</sup>  | 2.903    |
| H35A | C42 <sup>5</sup>   | 3.389    | H35A | H9C <sup>7</sup>   | 3.162    |
| H35A | H10 <sup>11</sup>  | 3.063    | H35A | H15A <sup>11</sup> | 3.030    |
| H35A | H16A <sup>7</sup>  | 3.070    | H35A | H42A <sup>5</sup>  | 3.037    |
| H35A | H42B <sup>5</sup>  | 3.212    | H35A | H42C <sup>5</sup>  | 3.357    |
| H35B | C10 <sup>11</sup>  | 3.593    | H35B | C15 <sup>11</sup>  | 3.157    |
| H35B | C42 <sup>5</sup>   | 3.247    | H35B | H10 <sup>11</sup>  | 2.902    |
| H35B | H15A <sup>11</sup> | 2.192    | H35B | H42A <sup>5</sup>  | 2.607    |
| H35B | H42B <sup>5</sup>  | 3.526    | H35B | H42C <sup>5</sup>  | 3.152    |
| H35C | C42 <sup>5</sup>   | 3.275    | H35C | H42A <sup>5</sup>  | 2.555    |
| H35C | H42B <sup>5</sup>  | 3.240    | H36  | C2 <sup>1</sup>    | 3.341    |
| H36  | C6 <sup>1</sup>    | 3.337    | H36  | C7 <sup>1</sup>    | 2.689    |
| H36  | H1B <sup>1</sup>   | 3.112    | H36  | H7 <sup>1</sup>    | 2.304    |
| H36  | H8C <sup>1</sup>   | 3.096    | H38  | Cl3 <sup>5</sup>   | 2.868    |
| H38  | H15A <sup>11</sup> | 3.169    | H38  | H15C <sup>11</sup> | 3.262    |

Table S9-12. Intermolecular contacts less than 3.60 Å involving hydrogens (continued)

| atom | atom               | distance | atom | atom               | distance |
|------|--------------------|----------|------|--------------------|----------|
| H38  | H22 <sup>1</sup>   | 3.502    | H38  | H25B <sup>1</sup>  | 3.064    |
| H41A | C8 <sup>1</sup>    | 3.051    | H41A | H7 <sup>1</sup>    | 3.348    |
| H41A | H8B <sup>1</sup>   | 3.248    | H41A | H8C <sup>1</sup>   | 2.144    |
| H41A | H25B <sup>10</sup> | 3.386    | H41A | H25C <sup>10</sup> | 3.103    |
| H41A | H26B <sup>1</sup>  | 3.179    | H41B | C25 <sup>10</sup>  | 3.406    |
| H41B | H8C <sup>1</sup>   | 3.505    | H41B | H16B <sup>12</sup> | 3.022    |
| H41B | H25A <sup>10</sup> | 3.493    | H41B | H25B <sup>10</sup> | 3.449    |
| H41B | H25C <sup>10</sup> | 2.770    | H41C | C15 <sup>12</sup>  | 3.553    |
| H41C | C16 <sup>12</sup>  | 3.225    | H41C | C26 <sup>1</sup>   | 3.158    |
| H41C | H15B <sup>12</sup> | 3.391    | H41C | H15C <sup>12</sup> | 2.873    |
| H41C | H16B <sup>12</sup> | 2.560    | H41C | H16C <sup>12</sup> | 3.023    |
| H41C | H25B <sup>10</sup> | 3.265    | H41C | H25C <sup>10</sup> | 3.363    |
| H41C | H26A <sup>1</sup>  | 3.180    | H41C | H26B <sup>1</sup>  | 2.337    |
| H42A | C13 <sup>5</sup>   | 3.183    | H42A | C35 <sup>5</sup>   | 2.888    |
| H42A | H8B <sup>5</sup>   | 3.310    | H42A | H15A <sup>4</sup>  | 3.376    |
| H42A | H35A <sup>5</sup>  | 3.037    | H42A | H35B <sup>5</sup>  | 2.607    |
| H42A | H35C <sup>5</sup>  | 2.555    | H42B | C16 <sup>12</sup>  | 2.787    |
| H42B | C35 <sup>5</sup>   | 3.517    | H42B | H16A <sup>12</sup> | 2.833    |
| H42B | H16B <sup>12</sup> | 2.789    | H42B | H16C <sup>12</sup> | 2.291    |
| H42B | H26A <sup>1</sup>  | 3.079    | H42B | H35A <sup>5</sup>  | 3.212    |
| H42B | H35B <sup>5</sup>  | 3.526    | H42B | H35C <sup>5</sup>  | 3.240    |
| H42C | C15 <sup>4</sup>   | 3.324    | H42C | C16 <sup>12</sup>  | 3.511    |
| H42C | C35 <sup>5</sup>   | 3.561    | H42C | H15A <sup>4</sup>  | 2.882    |
| H42C | H15B <sup>4</sup>  | 2.893    | H42C | H16A <sup>12</sup> | 3.333    |
| H42C | H16B <sup>12</sup> | 3.197    | H42C | H16C <sup>12</sup> | 3.421    |
| H42C | H35A <sup>5</sup>  | 3.357    | H42C | H35B <sup>5</sup>  | 3.152    |
| H43A | C1 <sup>1</sup>    | 3.373    | H43A | C17 <sup>1</sup>   | 3.025    |
| H43A | H1B <sup>1</sup>   | 2.483    | H43A | H17A <sup>1</sup>  | 2.491    |
| H43A | H17B <sup>1</sup>  | 2.952    | H43A | H17C <sup>1</sup>  | 3.158    |
| H43B | C10 <sup>11</sup>  | 3.583    | H43B | C23 <sup>1</sup>   | 2.947    |
| H43B | C24 <sup>1</sup>   | 3.035    | H43B | C25 <sup>1</sup>   | 3.145    |
| H43B | H1B <sup>1</sup>   | 3.302    | H43B | H10 <sup>11</sup>  | 3.344    |
| H43B | H15A <sup>11</sup> | 3.392    | H43B | H15C <sup>11</sup> | 3.338    |
| H43B | H24 <sup>1</sup>   | 3.098    | H43B | H25A <sup>1</sup>  | 3.169    |
| H43B | H25B <sup>1</sup>  | 2.812    | H43C | C10 <sup>11</sup>  | 3.242    |
| H43C | C15 <sup>11</sup>  | 3.559    | H43C | H10 <sup>11</sup>  | 2.596    |
| H43C | H15A <sup>11</sup> | 2.948    | H43C | H17A <sup>1</sup>  | 3.379    |

Table S9-12. Intermolecular contacts less than 3.60 Å involving hydrogens (continued)

| atom | atom | distance | atom | atom | distance |
|------|------|----------|------|------|----------|
|------|------|----------|------|------|----------|

Symmetry Operators:

- |      |                 |      |                   |
|------|-----------------|------|-------------------|
| (1)  | X,-Y+1,Z+1      | (2)  | -X,Y+1/2-1,-Z+1/2 |
| (3)  | X-1,-Y+1,Z      | (4)  | X+1,-Y+1,Z+1      |
| (5)  | -X+1,-Y+1,-Z+1  | (6)  | X,-Y+1,Z          |
| (7)  | -X,-Y+1,-Z      | (8)  | -X,-Y,-Z          |
| (9)  | X-1,Y,Z-1       | (10) | -X+1,-Y,-Z+1      |
| (11) | -X,Y+1/2,-Z+1/2 | (12) | X+1,Y,Z+1         |

X-ray Structure Report

for

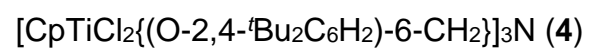

April 6, 2017

## Experimental

### Data Collection

An orange block crystal of  $C_{60}H_{81}Cl_6NO_3Ti_3$  having approximate dimensions of 0.120 x 0.080 x 0.070 mm was mounted in a loop. All measurements were made on a Rigaku XtaLAB mini diffractometer using multi-layer mirror monochromated Mo-K $\alpha$  radiation.

The crystal-to-detector distance was 50.00 mm.

Cell constants and an orientation matrix for data collection corresponded to a R-centered trigonal cell (laue class: -3) with dimensions:

$$\begin{aligned} a &= 24.4075(13) \text{ \AA} \\ c &= 23.4369(16) \text{ \AA} \\ V &= 12091.4(12) \text{ \AA}^3 \end{aligned}$$

For  $Z = 6$  and F.W. = 1220.72, the calculated density is 1.006 g/cm<sup>3</sup>. Based on the reflection conditions of:

$$\text{hkil: } -h+k+l = 3n$$

packing considerations, a statistical analysis of intensity distribution, and the successful solution and refinement of the structure, the space group was determined to be:

$$R\text{-}3(h) \text{ (\#148)}$$

The data were collected at a temperature of  $-180 \pm 1^\circ\text{C}$  to a maximum  $2\theta$  value of  $65.1^\circ$ . A total of 540 oscillation images were collected. A sweep of data was done using  $\omega$  scans from  $-60.0$  to  $120.0^\circ$  in  $1.00^\circ$  step, at  $\chi=54.0^\circ$  and  $\phi = 0.0^\circ$ . The exposure rate was 64.0 [sec./ $^\circ$ ]. The detector swing angle was  $30.00^\circ$ . A second sweep was performed using  $\omega$  scans from  $-60.0$  to  $120.0^\circ$  in  $1.00^\circ$  step, at  $\chi=54.0^\circ$  and  $\phi = 120.0^\circ$ . The exposure rate was 64.0 [sec./ $^\circ$ ]. The detector swing angle was  $30.00^\circ$ . Another sweep was performed using  $\omega$  scans from  $-60.0$  to  $120.0^\circ$  in  $1.00^\circ$  step, at  $\chi=54.0^\circ$  and  $\phi = 240.0^\circ$ . The exposure rate was 64.0 [sec./ $^\circ$ ]. The detector swing angle

was 30.00°. The crystal-to-detector distance was 50.00 mm. Readout was performed in the 0.073 mm pixel mode.

### Data Reduction

Of the 0 reflections were collected, where 0 were unique ( $R_{\text{int}} = 0.1254$ ); equivalent reflections were merged. Data were collected and processed using CrysAlisPro (Rigaku Oxford Diffraction).<sup>1</sup>

The linear absorption coefficient,  $\mu$ , for Mo-K $\alpha$  radiation is 5.211 cm<sup>-1</sup>. An empirical absorption correction was applied which resulted in transmission factors ranging from 0.952 to 0.964. The data were corrected for Lorentz and polarization effects.

### Structure Solution and Refinement

The structure was solved by direct methods<sup>2</sup> and expanded using Fourier techniques. The non-hydrogen atoms were refined anisotropically. Hydrogen atoms were refined using the riding model. The final cycle of full-matrix least-squares refinement<sup>3</sup> on  $F^2$  was based on 6172 observed reflections and 220 variable parameters and converged (largest parameter shift was 0.00 times its esd) with unweighted and weighted agreement factors of:

$$R1 = \sum ||F_o| - |F_c|| / \sum |F_o| = 0.0750$$

$$wR2 = [ \sum ( w (F_o^2 - F_c^2)^2 ) / \sum w(F_o^2)^2 ]^{1/2} = 0.2317$$

The goodness of fit<sup>4</sup> was 0.98. Unit weights were used. The maximum and minimum peaks on the final difference Fourier map corresponded to 0.87 and -0.35 e<sup>-</sup>/Å<sup>3</sup>, respectively.

Neutral atom scattering factors were taken from International Tables for Crystallography (IT), Vol. C, Table 6.1.1.4<sup>5</sup>. Anomalous dispersion effects were included in  $F_{\text{calc}}$ <sup>6</sup>; the values for  $\Delta f'$  and  $\Delta f''$  were those of Creagh and McAuley<sup>7</sup>. The values for the mass attenuation coefficients are those of Creagh and Hubbell<sup>8</sup>. All calculations were performed using the CrystalStructure<sup>9</sup> crystallographic software package except for refinement, which was performed using SHELXL Version 2014/7<sup>10</sup>.

## References

(1) CrysAlisPro: Data Collection and Processing Software, Rigaku Corporation (2015). Tokyo 196-8666, Japan.

(2) SHELXT Version 2014/5: Sheldrick, G. M. (2014). Acta Cryst. A70, C1437.

(3) Least Squares function minimized: (SHELXL Version 2014/7)

$$\sum w(F_o^2 - F_c^2)^2 \quad \text{where } w = \text{Least Squares weights.}$$

(4) Goodness of fit is defined as:

$$[\sum w(F_o^2 - F_c^2)^2 / (N_o - N_v)]^{1/2}$$

where:  $N_o$  = number of observations  
 $N_v$  = number of variables

(5) International Tables for Crystallography, Vol.C (1992). Ed. A.J.C. Wilson, Kluwer Academic Publishers, Dordrecht, Netherlands, Table 6.1.1.4, pp. 572.

(6) Ibers, J. A. & Hamilton, W. C.; Acta Crystallogr., 17, 781 (1964).

(7) Creagh, D. C. & McAuley, W.J. ; "International Tables for Crystallography", Vol C, (A.J.C. Wilson, ed.), Kluwer Academic Publishers, Boston, Table 4.2.6.8, pages 219-222 (1992).

(8) Creagh, D. C. & Hubbell, J.H.; "International Tables for Crystallography", Vol C, (A.J.C. Wilson, ed.), Kluwer Academic Publishers, Boston, Table 4.2.4.3, pages 200-206 (1992).

(9) CrystalStructure 4.2: Crystal Structure Analysis Package, Rigaku Corporation (2000-2015). Tokyo 196-8666, Japan.

(10) SHELXL Version 2014/7: Sheldrick, G. M. (2008). Acta Cryst. A64, 112-122.

## EXPERIMENTAL DETAILS

### A. Crystal Data

|                         |                                                                                                   |
|-------------------------|---------------------------------------------------------------------------------------------------|
| Empirical Formula       | $C_{60}H_{81}Cl_6NO_3Ti_3$                                                                        |
| Formula Weight          | 1220.72                                                                                           |
| Crystal Color, Habit    | orange, block                                                                                     |
| Crystal Dimensions      | 0.120 X 0.080 X 0.070 mm                                                                          |
| Crystal System          | trigonal                                                                                          |
| Lattice Type            | R-centered                                                                                        |
| Lattice Parameters      | $a = 24.4075(13) \text{ \AA}$<br>$c = 23.4369(16) \text{ \AA}$<br>$V = 12091.4(12) \text{ \AA}^3$ |
| Space Group             | R-3 (#148)                                                                                        |
| Z value                 | 6                                                                                                 |
| $D_{\text{calc}}$       | 1.006 g/cm <sup>3</sup>                                                                           |
| $F_{000}$               | 3840.00                                                                                           |
| $\mu(\text{MoK}\alpha)$ | 5.211 cm <sup>-1</sup>                                                                            |



## B. Intensity Measurements

|                                                        |                                                                                      |
|--------------------------------------------------------|--------------------------------------------------------------------------------------|
| Diffractometer                                         | XtaLAB mini                                                                          |
| Radiation                                              | MoK $\alpha$ ( $\lambda = 0.71073 \text{ \AA}$ )<br>multi-layer mirror monochromated |
| Voltage, Current                                       | 50kV, 24mA                                                                           |
| Temperature                                            | -180.0 $^{\circ}$ C                                                                  |
| Detector Aperture                                      | 75.0 mm (diameter)                                                                   |
| Data Images                                            | 540 exposures                                                                        |
| $\omega$ oscillation Range ( $\chi=54.0, \phi=0.0$ )   | -60.0 - 120.0 $^{\circ}$                                                             |
| Exposure Rate                                          | 64.0 sec./ $^{\circ}$                                                                |
| Detector Swing Angle                                   | 30.00 $^{\circ}$                                                                     |
| $\omega$ oscillation Range ( $\chi=54.0, \phi=120.0$ ) | -60.0 - 120.0 $^{\circ}$                                                             |
| Exposure Rate                                          | 64.0 sec./ $^{\circ}$                                                                |
| Detector Swing Angle                                   | 30.00 $^{\circ}$                                                                     |
| $\omega$ oscillation Range ( $\chi=54.0, \phi=240.0$ ) | -60.0 - 120.0 $^{\circ}$                                                             |
| Exposure Rate                                          | 64.0 sec./ $^{\circ}$                                                                |
| Detector Swing Angle                                   | 30.00 $^{\circ}$                                                                     |
| Detector Position                                      | 50.00 mm                                                                             |
| Pixel Size                                             | 0.073 mm                                                                             |
| $2\theta_{\max}$                                       | 55.0 $^{\circ}$                                                                      |
| No. of Reflections Measured                            | Total: 43023                                                                         |

Corrections

Unique: 6172 ( $R_{\text{int}} = 0.1254$ )

Lorentz-polarization

Absorption

(trans. factors: 0.952 - 0.964)

### C. Structure Solution and Refinement

|                                     |                                                                                                                        |
|-------------------------------------|------------------------------------------------------------------------------------------------------------------------|
| Structure Solution<br>2014/5)       | Direct Methods (SHELXT Version                                                                                         |
| Refinement                          | Full-matrix least-squares on F <sup>2</sup>                                                                            |
| Function Minimized                  | $\sum w (F_o^2 - F_c^2)^2$                                                                                             |
| Least Squares Weights               | $w = 1 / [ \sigma^2(F_o^2) + (0.1174 \cdot P)^2 + 0.0000 \cdot P ]$<br>where $P = (\text{Max}(F_o^2, 0) + 2F_c^2) / 3$ |
| 2 $\theta_{\text{max}}$ cutoff      | 55.0 $^\circ$                                                                                                          |
| Anomalous Dispersion                | All non-hydrogen atoms                                                                                                 |
| No. Observations (All reflections)  | 6172                                                                                                                   |
| No. Variables                       | 220                                                                                                                    |
| Reflection/Parameter Ratio          | 28.05                                                                                                                  |
| Residuals: R1 (I>2.00 $\sigma$ (I)) | 0.0750                                                                                                                 |
| Residuals: R (All reflections)      | 0.1434                                                                                                                 |
| Residuals: wR2 (All reflections)    | 0.2317                                                                                                                 |
| Goodness of Fit Indicator           | 0.984                                                                                                                  |
| Max Shift/Error in Final Cycle      | 0.001                                                                                                                  |
| Maximum peak in Final Diff. Map     | 0.87 e <sup>-</sup> /Å <sup>3</sup>                                                                                    |
| Minimum peak in Final Diff. Map     | -0.35 e <sup>-</sup> /Å <sup>3</sup>                                                                                   |

Table S10-1. Atomic coordinates and  $B_{\text{iso}}/B_{\text{eq}}$  and occupancy

| atom | x           | y           | z           | $B_{\text{eq}}$ | occ |
|------|-------------|-------------|-------------|-----------------|-----|
| Ti1  | 0.54550(4)  | 0.44272(4)  | 0.76933(3)  | 3.02(2)         | 1   |
| Cl1  | 0.45778(6)  | 0.43734(6)  | 0.80772(6)  | 4.39(3)         | 1   |
| Cl2  | 0.59093(5)  | 0.42821(5)  | 0.84628(5)  | 3.77(3)         | 1   |
| O1   | 0.51675(12) | 0.37056(13) | 0.73144(12) | 2.83(5)         | 1   |
| N1   | 0.66667     | 0.33333     | 0.6982(2)   | 2.42(10)        | 1/3 |
| C1   | 0.61930(18) | 0.35015(18) | 0.71563(17) | 2.49(7)         | 1   |
| C2   | 0.56262(18) | 0.32284(19) | 0.67578(17) | 2.71(7)         | 1   |
| C3   | 0.51099(19) | 0.33084(19) | 0.68685(17) | 2.79(7)         | 1   |
| C4   | 0.4547(2)   | 0.2989(2)   | 0.65483(18) | 3.42(9)         | 1   |
| C5   | 0.4556(2)   | 0.2650(2)   | 0.6076(2)   | 3.73(9)         | 1   |
| C6   | 0.5086(2)   | 0.2600(2)   | 0.59288(18) | 3.32(8)         | 1   |
| C7   | 0.56014(19) | 0.28755(19) | 0.62785(17) | 2.72(7)         | 1   |
| C8   | 0.5069(2)   | 0.2235(2)   | 0.5385(2)   | 4.00(10)        | 1   |
| C9   | 0.5673(3)   | 0.2238(4)   | 0.5284(3)   | 7.9(2)          | 1   |
| C10  | 0.4507(3)   | 0.1587(3)   | 0.5388(3)   | 8.1(2)          | 1   |
| C11  | 0.4980(4)   | 0.2586(4)   | 0.4867(3)   | 7.43(17)        | 1   |
| C12  | 0.3947(2)   | 0.3014(3)   | 0.6711(2)   | 4.60(11)        | 1   |
| C13  | 0.3777(2)   | 0.2821(3)   | 0.7337(2)   | 4.49(11)        | 1   |
| C14  | 0.4040(3)   | 0.3681(3)   | 0.6603(3)   | 5.88(14)        | 1   |
| C15  | 0.3382(3)   | 0.2545(4)   | 0.6349(3)   | 7.34(19)        | 1   |
| C16  | 0.6027(5)   | 0.4954(3)   | 0.6877(4)   | 7.82(19)        | 1   |
| C17  | 0.6412(3)   | 0.5132(3)   | 0.7267(4)   | 6.45(18)        | 1   |
| C18  | 0.6279(4)   | 0.5476(3)   | 0.7669(3)   | 7.41(19)        | 1   |
| C19  | 0.5717(4)   | 0.5451(3)   | 0.7436(4)   | 7.8(2)          | 1   |
| C20  | 0.5617(4)   | 0.5115(4)   | 0.6941(4)   | 7.6(2)          | 1   |

$$B_{\text{eq}} = 8/3 \pi^2 (U_{11}(aa^*)^2 + U_{22}(bb^*)^2 + U_{33}(cc^*)^2 + 2U_{12}(aa^*bb^*)\cos \gamma + 2U_{13}(aa^*cc^*)\cos \beta + 2U_{23}(bb^*cc^*)\cos \alpha)$$

Table S10-2. Atomic coordinates and  $B_{\text{iso}}$  involving hydrogen atoms

| atom | x       | y       | z       | $B_{\text{iso}}$ | occ |
|------|---------|---------|---------|------------------|-----|
| H1A  | 0.63905 | 0.39680 | 0.71635 | 2.989            | 1   |
| H1B  | 0.60473 | 0.33430 | 0.75478 | 2.989            | 1   |
| H5   | 0.41890 | 0.24449 | 0.58432 | 4.474            | 1   |
| H7   | 0.59549 | 0.28261 | 0.61937 | 3.268            | 1   |
| H9A  | 0.60259 | 0.26746 | 0.52869 | 9.429            | 1   |
| H9B  | 0.57355 | 0.19968 | 0.55869 | 9.429            | 1   |
| H9C  | 0.56557 | 0.20436 | 0.49139 | 9.429            | 1   |
| H10A | 0.41244 | 0.16139 | 0.54551 | 9.666            | 1   |
| H10B | 0.44723 | 0.13835 | 0.50186 | 9.666            | 1   |
| H10C | 0.45521 | 0.13367 | 0.56916 | 9.666            | 1   |
| H11A | 0.53404 | 0.30180 | 0.48458 | 8.920            | 1   |
| H11B | 0.49542 | 0.23597 | 0.45138 | 8.920            | 1   |
| H11C | 0.45890 | 0.26011 | 0.49173 | 8.920            | 1   |
| H13A | 0.41284 | 0.31109 | 0.75823 | 5.386            | 1   |
| H13B | 0.33966 | 0.28398 | 0.74376 | 5.386            | 1   |
| H13C | 0.36955 | 0.23884 | 0.73924 | 5.386            | 1   |
| H14A | 0.43985 | 0.39936 | 0.68286 | 7.058            | 1   |
| H14B | 0.41230 | 0.37857 | 0.61968 | 7.058            | 1   |
| H14C | 0.36556 | 0.36867 | 0.67154 | 7.058            | 1   |
| H15A | 0.34751 | 0.26543 | 0.59440 | 8.808            | 1   |
| H15B | 0.33050 | 0.21155 | 0.64125 | 8.808            | 1   |
| H15C | 0.30061 | 0.25669 | 0.64577 | 8.808            | 1   |
| H16  | 0.60559 | 0.47317 | 0.65299 | 9.378            | 1   |
| H17  | 0.67976 | 0.50883 | 0.72719 | 7.735            | 1   |
| H18  | 0.65505 | 0.57410 | 0.79915 | 8.898            | 1   |
| H19  | 0.55102 | 0.56955 | 0.75617 | 9.311            | 1   |
| H20  | 0.52895 | 0.50478 | 0.66500 | 9.075            | 1   |

Table S10-3. Anisotropic displacement parameters

| atom | U <sub>11</sub> | U <sub>22</sub> | U <sub>33</sub> | U <sub>12</sub> | U <sub>13</sub> | U <sub>23</sub> |
|------|-----------------|-----------------|-----------------|-----------------|-----------------|-----------------|
| Ti1  | 0.0409(5)       | 0.0360(5)       | 0.0420(5)       | 0.0224(4)       | 0.0008(4)       | 0.0022(3)       |
| Cl1  | 0.0534(8)       | 0.0602(8)       | 0.0634(8)       | 0.0361(7)       | 0.0062(6)       | -0.0047(6)      |
| Cl2  | 0.0500(7)       | 0.0417(6)       | 0.0462(7)       | 0.0191(5)       | -0.0094(5)      | 0.0000(5)       |
| O1   | 0.0315(15)      | 0.0401(16)      | 0.0411(16)      | 0.0219(13)      | -0.0016(12)     | -0.0006(13)     |
| N1   | 0.0276(18)      | 0.0276(18)      | 0.037(3)        | 0.0138(9)       | 0.00000         | 0.00000         |
| C1   | 0.031(2)        | 0.031(2)        | 0.037(2)        | 0.0188(18)      | -0.0009(17)     | 0.0005(17)      |
| C2   | 0.031(2)        | 0.035(2)        | 0.037(2)        | 0.0174(18)      | -0.0006(18)     | 0.0057(18)      |
| C3   | 0.035(2)        | 0.037(2)        | 0.035(2)        | 0.0183(19)      | 0.0013(18)      | 0.0030(18)      |
| C4   | 0.032(2)        | 0.061(3)        | 0.037(2)        | 0.024(2)        | -0.0052(19)     | -0.005(2)       |
| C5   | 0.034(2)        | 0.066(3)        | 0.041(3)        | 0.025(2)        | -0.006(2)       | -0.007(2)       |
| C6   | 0.043(3)        | 0.046(3)        | 0.034(2)        | 0.020(2)        | -0.0029(19)     | -0.009(2)       |
| C7   | 0.029(2)        | 0.036(2)        | 0.037(2)        | 0.0145(18)      | 0.0030(18)      | 0.0037(18)      |
| C8   | 0.042(3)        | 0.061(3)        | 0.039(3)        | 0.019(2)        | -0.004(2)       | -0.016(2)       |
| C9   | 0.061(4)        | 0.148(7)        | 0.088(5)        | 0.050(4)        | -0.015(3)       | -0.066(5)       |
| C10  | 0.067(4)        | 0.091(5)        | 0.117(6)        | 0.016(4)        | 0.012(4)        | -0.054(4)       |
| C11  | 0.110(6)        | 0.123(6)        | 0.058(4)        | 0.065(5)        | -0.006(4)       | -0.018(4)       |
| C12  | 0.045(3)        | 0.083(4)        | 0.055(3)        | 0.039(3)        | -0.013(2)       | -0.015(3)       |
| C13  | 0.038(3)        | 0.071(3)        | 0.063(3)        | 0.028(3)        | -0.000(2)       | -0.010(3)       |
| C14  | 0.075(4)        | 0.115(5)        | 0.066(4)        | 0.072(4)        | -0.015(3)       | -0.014(4)       |
| C15  | 0.053(3)        | 0.149(7)        | 0.093(5)        | 0.062(4)        | -0.031(3)       | -0.058(5)       |
| C16  | 0.126(6)        | 0.066(4)        | 0.075(4)        | 0.026(4)        | 0.027(5)        | 0.011(4)        |
| C17  | 0.056(4)        | 0.055(4)        | 0.135(7)        | 0.029(3)        | 0.039(4)        | 0.054(4)        |
| C18  | 0.115(5)        | 0.037(3)        | 0.053(3)        | -0.019(3)       | -0.014(4)       | 0.010(3)        |
| C19  | 0.114(5)        | 0.061(4)        | 0.150(6)        | 0.067(4)        | 0.082(5)        | 0.047(4)        |
| C20  | 0.079(4)        | 0.089(5)        | 0.095(5)        | 0.023(3)        | -0.027(4)       | 0.049(4)        |

The general temperature factor expression:  $\exp(-2\pi^2(a^2U_{11}h^2 + b^2U_{22}k^2 + c^2U_{33}l^2 + 2a*b*U_{12}hk + 2a*c*U_{13}hl + 2b*c*U_{23}kl))$

Table S10-4. Bond lengths (Å)

| atom | atom            | distance   | atom | atom            | distance   |
|------|-----------------|------------|------|-----------------|------------|
| Ti1  | Cl1             | 2.2649(19) | Ti1  | Cl2             | 2.2361(16) |
| Ti1  | O1              | 1.774(3)   | Ti1  | C16             | 2.339(8)   |
| Ti1  | C17             | 2.323(7)   | Ti1  | C18             | 2.336(5)   |
| Ti1  | C19             | 2.328(8)   | Ti1  | C20             | 2.328(9)   |
| O1   | C3              | 1.384(5)   | N1   | C1              | 1.465(5)   |
| N1   | C1 <sup>1</sup> | 1.465(5)   | N1   | C1 <sup>2</sup> | 1.465(5)   |
| C1   | C2              | 1.519(6)   | C2   | C3              | 1.393(7)   |
| C2   | C7              | 1.398(6)   | C3   | C4              | 1.409(6)   |
| C4   | C5              | 1.388(7)   | C4   | C12             | 1.542(9)   |
| C5   | C6              | 1.402(8)   | C6   | C7              | 1.364(6)   |
| C6   | C8              | 1.545(7)   | C8   | C9              | 1.489(10)  |
| C8   | C10             | 1.488(7)   | C8   | C11             | 1.563(10)  |
| C12  | C13             | 1.536(7)   | C12  | C14             | 1.551(10)  |
| C12  | C15             | 1.534(7)   | C16  | C17             | 1.223(13)  |
| C16  | C20             | 1.254(17)  | C17  | C18             | 1.403(12)  |
| C18  | C19             | 1.449(14)  | C19  | C20             | 1.370(13)  |

Symmetry Operators:

(1) -Y+1,X-Y,Z

(2) -X+Y+1,-X+1,Z

Table S10-5. Bond lengths involving hydrogens (Å)

| atom | atom | distance | atom | atom | distance |
|------|------|----------|------|------|----------|
| C1   | H1A  | 0.990    | C1   | H1B  | 0.990    |
| C5   | H5   | 0.950    | C7   | H7   | 0.950    |
| C9   | H9A  | 0.980    | C9   | H9B  | 0.980    |
| C9   | H9C  | 0.980    | C10  | H10A | 0.980    |
| C10  | H10B | 0.980    | C10  | H10C | 0.980    |
| C11  | H11A | 0.980    | C11  | H11B | 0.980    |
| C11  | H11C | 0.980    | C13  | H13A | 0.980    |
| C13  | H13B | 0.980    | C13  | H13C | 0.980    |
| C14  | H14A | 0.980    | C14  | H14B | 0.980    |
| C14  | H14C | 0.980    | C15  | H15A | 0.980    |
| C15  | H15B | 0.980    | C15  | H15C | 0.980    |
| C16  | H16  | 1.000    | C17  | H17  | 1.000    |
| C18  | H18  | 1.000    | C19  | H19  | 1.000    |
| C20  | H20  | 1.000    |      |      |          |



Table S10-6. Bond angles (°)

| atom | atom | atom            | angle      | atom            | atom | atom            | angle      |
|------|------|-----------------|------------|-----------------|------|-----------------|------------|
| Cl1  | Ti1  | Cl2             | 101.52(6)  | Cl1             | Ti1  | O1              | 104.37(10) |
| Cl1  | Ti1  | C16             | 130.1(3)   | Cl1             | Ti1  | C17             | 141.7(2)   |
| Cl1  | Ti1  | C18             | 110.2(2)   | Cl1             | Ti1  | C19             | 84.8(3)    |
| Cl1  | Ti1  | C20             | 99.1(3)    | Cl2             | Ti1  | O1              | 103.17(12) |
| Cl2  | Ti1  | C16             | 122.7(3)   | Cl2             | Ti1  | C17             | 94.0(2)    |
| Cl2  | Ti1  | C18             | 88.3(2)    | Cl2             | Ti1  | C19             | 119.1(2)   |
| Cl2  | Ti1  | C20             | 143.73(18) | O1              | Ti1  | C16             | 88.1(2)    |
| O1   | Ti1  | C17             | 105.8(2)   | O1              | Ti1  | C18             | 140.6(2)   |
| O1   | Ti1  | C19             | 134.1(3)   | O1              | Ti1  | C20             | 100.2(2)   |
| C16  | Ti1  | C17             | 30.4(3)    | C16             | Ti1  | C18             | 55.0(2)    |
| C16  | Ti1  | C19             | 55.2(4)    | C16             | Ti1  | C20             | 31.2(4)    |
| C17  | Ti1  | C18             | 35.0(3)    | C17             | Ti1  | C19             | 57.2(3)    |
| C17  | Ti1  | C20             | 52.7(3)    | C18             | Ti1  | C19             | 36.2(3)    |
| C18  | Ti1  | C20             | 56.5(2)    | C19             | Ti1  | C20             | 34.2(3)    |
| Ti1  | O1   | C3              | 157.6(2)   | C1              | N1   | C1 <sup>1</sup> | 112.5(2)   |
| C1   | N1   | C1 <sup>2</sup> | 112.5(2)   | C1 <sup>1</sup> | N1   | C1 <sup>2</sup> | 112.5(2)   |
| N1   | C1   | C2              | 112.3(4)   | C1              | C2   | C3              | 120.9(4)   |
| C1   | C2   | C7              | 120.9(4)   | C3              | C2   | C7              | 118.2(4)   |
| O1   | C3   | C2              | 117.2(3)   | O1              | C3   | C4              | 121.3(5)   |
| C2   | C3   | C4              | 121.5(4)   | C3              | C4   | C5              | 116.9(5)   |
| C3   | C4   | C12             | 121.9(4)   | C5              | C4   | C12             | 121.2(4)   |
| C4   | C5   | C6              | 122.6(4)   | C5              | C6   | C7              | 118.2(4)   |
| C5   | C6   | C8              | 119.6(4)   | C7              | C6   | C8              | 122.1(5)   |
| C2   | C7   | C6              | 122.1(5)   | C6              | C8   | C9              | 112.8(4)   |
| C6   | C8   | C10             | 110.7(4)   | C6              | C8   | C11             | 107.1(5)   |
| C9   | C8   | C10             | 113.1(6)   | C9              | C8   | C11             | 106.5(5)   |
| C10  | C8   | C11             | 106.2(5)   | C4              | C12  | C13             | 110.0(5)   |
| C4   | C12  | C14             | 111.0(4)   | C4              | C12  | C15             | 110.6(5)   |
| C13  | C12  | C14             | 110.6(5)   | C13             | C12  | C15             | 107.2(4)   |
| C14  | C12  | C15             | 107.3(6)   | Ti1             | C16  | C17             | 74.1(5)    |
| Ti1  | C16  | C20             | 73.9(6)    | C17             | C16  | C20             | 113.0(9)   |
| Ti1  | C17  | C16             | 75.5(5)    | Ti1             | C17  | C18             | 73.0(4)    |
| C16  | C17  | C18             | 110.4(9)   | Ti1             | C18  | C17             | 72.0(3)    |
| Ti1  | C18  | C19             | 71.6(4)    | C17             | C18  | C19             | 102.6(6)   |
| Ti1  | C19  | C18             | 72.2(4)    | Ti1             | C19  | C20             | 72.9(5)    |
| C18  | C19  | C20             | 103.1(9)   | Ti1             | C20  | C16             | 74.9(6)    |
| Ti1  | C20  | C19             | 72.9(5)    | C16             | C20  | C19             | 110.9(8)   |

Table S10-6. Bond angles ( $^{\circ}$ ) (continued)

| atom | atom | atom | angle | atom | atom | atom | angle |
|------|------|------|-------|------|------|------|-------|
|------|------|------|-------|------|------|------|-------|

Symmetry Operators:

(1)  $-Y+1, X-Y, Z$

(2)  $-X+Y+1, -X+1, Z$

Table S10-7. Bond angles involving hydrogens (°)

| atom | atom | atom | angle | atom | atom | atom | angle |
|------|------|------|-------|------|------|------|-------|
| N1   | C1   | H1A  | 109.2 | N1   | C1   | H1B  | 109.2 |
| C2   | C1   | H1A  | 109.1 | C2   | C1   | H1B  | 109.1 |
| H1A  | C1   | H1B  | 107.9 | C4   | C5   | H5   | 118.7 |
| C6   | C5   | H5   | 118.7 | C2   | C7   | H7   | 118.9 |
| C6   | C7   | H7   | 118.9 | C8   | C9   | H9A  | 109.5 |
| C8   | C9   | H9B  | 109.5 | C8   | C9   | H9C  | 109.5 |
| H9A  | C9   | H9B  | 109.5 | H9A  | C9   | H9C  | 109.5 |
| H9B  | C9   | H9C  | 109.5 | C8   | C10  | H10A | 109.5 |
| C8   | C10  | H10B | 109.5 | C8   | C10  | H10C | 109.5 |
| H10A | C10  | H10B | 109.5 | H10A | C10  | H10C | 109.5 |
| H10B | C10  | H10C | 109.5 | C8   | C11  | H11A | 109.5 |
| C8   | C11  | H11B | 109.5 | C8   | C11  | H11C | 109.5 |
| H11A | C11  | H11B | 109.5 | H11A | C11  | H11C | 109.5 |
| H11B | C11  | H11C | 109.5 | C12  | C13  | H13A | 109.5 |
| C12  | C13  | H13B | 109.5 | C12  | C13  | H13C | 109.5 |
| H13A | C13  | H13B | 109.5 | H13A | C13  | H13C | 109.5 |
| H13B | C13  | H13C | 109.5 | C12  | C14  | H14A | 109.5 |
| C12  | C14  | H14B | 109.5 | C12  | C14  | H14C | 109.5 |
| H14A | C14  | H14B | 109.5 | H14A | C14  | H14C | 109.5 |
| H14B | C14  | H14C | 109.5 | C12  | C15  | H15A | 109.5 |
| C12  | C15  | H15B | 109.5 | C12  | C15  | H15C | 109.5 |
| H15A | C15  | H15B | 109.5 | H15A | C15  | H15C | 109.5 |
| H15B | C15  | H15C | 109.5 | Ti1  | C16  | H16  | 123.4 |
| C17  | C16  | H16  | 123.5 | C20  | C16  | H16  | 123.4 |
| Ti1  | C17  | H17  | 124.6 | C16  | C17  | H17  | 124.6 |
| C18  | C17  | H17  | 124.6 | Ti1  | C18  | H18  | 128.2 |
| C17  | C18  | H18  | 128.2 | C19  | C18  | H18  | 128.2 |
| Ti1  | C19  | H19  | 127.9 | C18  | C19  | H19  | 127.9 |
| C20  | C19  | H19  | 127.9 | Ti1  | C20  | H20  | 124.4 |
| C16  | C20  | H20  | 124.4 | C19  | C20  | H20  | 124.4 |

Table S10-8. Torsion Angles(°)

(Those having bond angles &gt; 160 or &lt; 20 degrees are excluded.)

| atom1 | atom2 | atom3 | atom4 | angle     | atom1 | atom2 | atom3 | atom4 | angle     |
|-------|-------|-------|-------|-----------|-------|-------|-------|-------|-----------|
| Cl1   | Ti1   | O1    | C3    | 136.6(6)  | Cl1   | Ti1   | C16   | C17   | 126.3(4)  |
| Cl1   | Ti1   | C16   | C20   | 6.0(4)    | Cl1   | Ti1   | C17   | C16   | -84.0(5)  |
| Cl1   | Ti1   | C17   | C18   | 33.1(6)   | Cl1   | Ti1   | C18   | C17   | -158.9(2) |
| Cl1   | Ti1   | C18   | C19   | -48.4(3)  | Cl1   | Ti1   | C19   | C18   | 135.2(3)  |
| Cl1   | Ti1   | C19   | C20   | -114.5(4) | Cl1   | Ti1   | C20   | C16   | -175.3(3) |
| Cl1   | Ti1   | C20   | C19   | 66.6(3)   | Cl2   | Ti1   | O1    | C3    | -117.7(6) |
| Cl2   | Ti1   | C16   | C17   | -21.9(6)  | Cl2   | Ti1   | C16   | C20   | -142.2(3) |
| Cl2   | Ti1   | C17   | C16   | 161.7(4)  | Cl2   | Ti1   | C17   | C18   | -81.2(3)  |
| Cl2   | Ti1   | C18   | C17   | 99.5(3)   | Cl2   | Ti1   | C18   | C19   | -150.0(2) |
| Cl2   | Ti1   | C19   | C18   | 34.9(5)   | Cl2   | Ti1   | C19   | C20   | 145.2(3)  |
| Cl2   | Ti1   | C20   | C16   | 60.7(6)   | Cl2   | Ti1   | C20   | C19   | -57.3(6)  |
| O1    | Ti1   | C16   | C17   | -126.4(5) | O1    | Ti1   | C16   | C20   | 113.3(3)  |
| C16   | Ti1   | O1    | C3    | 5.5(7)    | O1    | Ti1   | C17   | C16   | 56.8(4)   |
| O1    | Ti1   | C17   | C18   | 173.9(3)  | C17   | Ti1   | O1    | C3    | -19.6(7)  |
| O1    | Ti1   | C18   | C17   | -9.3(6)   | O1    | Ti1   | C18   | C19   | 101.2(4)  |
| C18   | Ti1   | O1    | C3    | -14.0(9)  | O1    | Ti1   | C19   | C18   | -119.8(3) |
| O1    | Ti1   | C19   | C20   | -9.4(6)   | C19   | Ti1   | O1    | C3    | 39.8(8)   |
| O1    | Ti1   | C20   | C16   | -68.8(3)  | O1    | Ti1   | C20   | C19   | 173.1(3)  |
| C20   | Ti1   | O1    | C3    | 34.4(7)   | C16   | Ti1   | C17   | C16   | -0.0(5)   |
| C16   | Ti1   | C17   | C18   | 117.1(8)  | C17   | Ti1   | C16   | C17   | -0.0(4)   |
| C17   | Ti1   | C16   | C20   | -120.3(7) | C16   | Ti1   | C18   | C17   | -33.4(4)  |
| C16   | Ti1   | C18   | C19   | 77.1(4)   | C18   | Ti1   | C16   | C17   | 38.6(4)   |
| C18   | Ti1   | C16   | C20   | -81.7(4)  | C16   | Ti1   | C19   | C18   | -76.5(5)  |
| C16   | Ti1   | C19   | C20   | 33.8(4)   | C19   | Ti1   | C16   | C17   | 83.1(5)   |
| C19   | Ti1   | C16   | C20   | -37.2(4)  | C16   | Ti1   | C20   | C16   | -0.0(3)   |
| C16   | Ti1   | C20   | C19   | -118.0(6) | C20   | Ti1   | C16   | C17   | 120.3(7)  |
| C20   | Ti1   | C16   | C20   | -0.0(3)   | C17   | Ti1   | C18   | C17   | 0.0(4)    |
| C17   | Ti1   | C18   | C19   | 110.5(5)  | C18   | Ti1   | C17   | C16   | -117.1(7) |
| C18   | Ti1   | C17   | C18   | -0.0(4)   | C17   | Ti1   | C19   | C18   | -39.8(4)  |
| C17   | Ti1   | C19   | C20   | 70.6(4)   | C19   | Ti1   | C17   | C16   | -76.0(5)  |
| C19   | Ti1   | C17   | C18   | 41.2(4)   | C17   | Ti1   | C20   | C16   | 33.3(3)   |
| C17   | Ti1   | C20   | C19   | -84.7(4)  | C20   | Ti1   | C17   | C16   | -34.2(4)  |
| C20   | Ti1   | C17   | C18   | 83.0(4)   | C18   | Ti1   | C19   | C18   | 0.0(3)    |
| C18   | Ti1   | C19   | C20   | 110.4(6)  | C19   | Ti1   | C18   | C17   | -110.5(6) |
| C19   | Ti1   | C18   | C19   | -0.0(4)   | C18   | Ti1   | C20   | C16   | 76.4(4)   |
| C18   | Ti1   | C20   | C19   | -41.6(3)  | C20   | Ti1   | C18   | C17   | -71.3(4)  |
| C20   | Ti1   | C18   | C19   | 39.2(3)   | C19   | Ti1   | C20   | C16   | 118.0(6)  |

Table S10-8. Torsion angles ( $^{\circ}$ ) (continued)

| atom1           | atom2 | atom3           | atom4           | angle     | atom1           | atom2 | atom3           | atom4           | angle     |
|-----------------|-------|-----------------|-----------------|-----------|-----------------|-------|-----------------|-----------------|-----------|
| C19             | Ti1   | C20             | C19             | 0.0(4)    | C20             | Ti1   | C19             | C18             | -110.4(7) |
| C20             | Ti1   | C19             | C20             | 0.0(4)    | Ti1             | O1    | C3              | C2              | 68.1(10)  |
| Ti1             | O1    | C3              | C4              | -113.2(7) | C1              | N1    | C1 <sup>1</sup> | C2 <sup>1</sup> | 151.6(3)  |
| C1 <sup>1</sup> | N1    | C1              | C2              | -79.9(4)  | C1              | N1    | C1 <sup>2</sup> | C2 <sup>2</sup> | -79.9(4)  |
| C1 <sup>2</sup> | N1    | C1              | C2              | 151.6(3)  | C1 <sup>1</sup> | N1    | C1 <sup>2</sup> | C2 <sup>2</sup> | 151.6(3)  |
| C1 <sup>2</sup> | N1    | C1 <sup>1</sup> | C2 <sup>1</sup> | -79.9(4)  | N1              | C1    | C2              | C3              | 176.7(3)  |
| N1              | C1    | C2              | C7              | -1.6(5)   | C1              | C2    | C3              | O1              | 7.3(5)    |
| C1              | C2    | C3              | C4              | -171.4(3) | C1              | C2    | C7              | C6              | 176.8(3)  |
| C3              | C2    | C7              | C6              | -1.5(6)   | C7              | C2    | C3              | O1              | -174.3(3) |
| C7              | C2    | C3              | C4              | 6.9(6)    | O1              | C3    | C4              | C5              | 173.9(3)  |
| O1              | C3    | C4              | C12             | -5.9(6)   | C2              | C3    | C4              | C5              | -7.4(6)   |
| C2              | C3    | C4              | C12             | 172.8(4)  | C3              | C4    | C5              | C6              | 2.5(7)    |
| C3              | C4    | C12             | C13             | -53.0(6)  | C3              | C4    | C12             | C14             | 69.8(6)   |
| C3              | C4    | C12             | C15             | -171.2(4) | C5              | C4    | C12             | C13             | 127.2(5)  |
| C5              | C4    | C12             | C14             | -110.0(5) | C5              | C4    | C12             | C15             | 9.0(7)    |
| C12             | C4    | C5              | C6              | -177.6(4) | C4              | C5    | C6              | C7              | 2.6(7)    |
| C4              | C5    | C6              | C8              | -177.8(4) | C5              | C6    | C7              | C2              | -3.2(6)   |
| C5              | C6    | C8              | C9              | 178.8(4)  | C5              | C6    | C8              | C10             | -53.4(6)  |
| C5              | C6    | C8              | C11             | 61.9(5)   | C7              | C6    | C8              | C9              | -1.6(6)   |
| C7              | C6    | C8              | C10             | 126.1(4)  | C7              | C6    | C8              | C11             | -118.5(5) |
| C8              | C6    | C7              | C2              | 177.3(4)  | Ti1             | C16   | C17             | Ti1             | 0.00(3)   |
| Ti1             | C16   | C17             | C18             | -65.2(4)  | Ti1             | C16   | C20             | Ti1             | 0.000(18) |
| Ti1             | C16   | C20             | C19             | 64.6(5)   | C17             | C16   | C20             | Ti1             | -64.4(6)  |
| C17             | C16   | C20             | C19             | 0.2(9)    | C20             | C16   | C17             | Ti1             | 64.3(6)   |
| C20             | C16   | C17             | C18             | -1.0(9)   | Ti1             | C17   | C18             | Ti1             | -0.00(3)  |
| Ti1             | C17   | C18             | C19             | -65.6(3)  | C16             | C17   | C18             | Ti1             | 66.9(5)   |
| C16             | C17   | C18             | C19             | 1.2(7)    | Ti1             | C18   | C19             | Ti1             | -0.00(2)  |
| Ti1             | C18   | C19             | C20             | -66.9(4)  | C17             | C18   | C19             | Ti1             | 65.9(4)   |
| C17             | C18   | C19             | C20             | -1.0(6)   | Ti1             | C19   | C20             | Ti1             | 0.00(3)   |
| Ti1             | C19   | C20             | C16             | -65.8(5)  | C18             | C19   | C20             | Ti1             | 66.4(5)   |
| C18             | C19   | C20             | C16             | 0.6(8)    |                 |       |                 |                 |           |

Symmetry Operators:

(1)  $-Y+1, X-Y, Z$ (2)  $-X+Y+1, -X+1, Z$

Table S10-9. Intramolecular contacts less than 3.60 Å

| atom | atom            | distance  | atom | atom            | distance  |
|------|-----------------|-----------|------|-----------------|-----------|
| O1   | C1              | 2.810(6)  | O1   | C12             | 2.948(5)  |
| O1   | C13             | 2.977(5)  | O1   | C14             | 3.193(8)  |
| N1   | C2 <sup>1</sup> | 2.478(5)  | N1   | C2 <sup>2</sup> | 2.478(5)  |
| N1   | C7              | 2.797(5)  | N1   | C7 <sup>1</sup> | 2.797(5)  |
| N1   | C7 <sup>2</sup> | 2.797(5)  | C1   | C2 <sup>2</sup> | 3.148(6)  |
| C1   | C7 <sup>2</sup> | 3.196(6)  | C2   | C5              | 2.771(6)  |
| C3   | C6              | 2.783(7)  | C3   | C13             | 3.056(7)  |
| C3   | C14             | 3.227(10) | C3   | C16             | 3.487(8)  |
| C4   | C7              | 2.795(8)  | C5   | C10             | 3.007(10) |
| C5   | C11             | 3.047(8)  | C5   | C14             | 3.552(11) |
| C5   | C15             | 2.819(9)  | C7   | C9              | 2.856(9)  |
| C7   | C11             | 3.560(7)  |      |                 |           |

Symmetry Operators:

(1) -Y+1,X-Y,Z

(2) -X+Y+1,-X+1,Z

Table S10-10. Intramolecular contacts less than 3.60 Å involving hydrogens

| atom | atom             | distance | atom | atom             | distance |
|------|------------------|----------|------|------------------|----------|
| Ti1  | H1A              | 3.251    | Ti1  | H13A             | 3.236    |
| Ti1  | H14A             | 3.024    | Cl1  | H13A             | 2.943    |
| Cl1  | H14A             | 3.035    | Cl1  | H19              | 3.116    |
| Cl2  | H1A              | 3.484    | Cl2  | H1B              | 3.277    |
| Cl2  | H17              | 3.478    | Cl2  | H18              | 3.283    |
| O1   | H1A              | 2.745    | O1   | H1B              | 2.756    |
| O1   | H13A             | 2.292    | O1   | H13C             | 3.424    |
| O1   | H14A             | 2.575    | O1   | H16              | 2.987    |
| O1   | H20              | 3.503    | N1   | H1A <sup>1</sup> | 2.020    |
| N1   | H1A <sup>2</sup> | 2.020    | N1   | H1B <sup>1</sup> | 2.020    |
| N1   | H1B <sup>2</sup> | 2.020    | N1   | H7               | 2.411    |
| N1   | H7 <sup>1</sup>  | 2.411    | N1   | H7 <sup>2</sup>  | 2.411    |
| C1   | H1A <sup>1</sup> | 2.461    | C1   | H1A <sup>2</sup> | 3.255    |
| C1   | H1B <sup>1</sup> | 2.849    | C1   | H1B <sup>2</sup> | 2.517    |
| C1   | H7               | 2.681    | C1   | H7 <sup>2</sup>  | 2.719    |
| C1   | H16              | 3.505    | C1   | H17              | 3.396    |
| C2   | H1A <sup>1</sup> | 2.775    | C2   | H7 <sup>2</sup>  | 2.983    |
| C2   | H9B <sup>2</sup> | 3.523    | C2   | H16              | 3.317    |
| C2   | H17 <sup>1</sup> | 3.431    | C3   | H1A              | 2.794    |
| C3   | H1B              | 2.754    | C3   | H5               | 3.245    |
| C3   | H7               | 3.251    | C3   | H13A             | 2.760    |
| C3   | H13C             | 3.273    | C3   | H14A             | 2.954    |
| C3   | H14B             | 3.528    | C3   | H16              | 3.164    |
| C4   | H13A             | 2.704    | C4   | H13B             | 3.368    |
| C4   | H13C             | 2.709    | C4   | H14A             | 2.732    |
| C4   | H14B             | 2.747    | C4   | H14C             | 3.390    |
| C4   | H15A             | 2.717    | C4   | H15B             | 2.716    |
| C4   | H15C             | 3.373    | C5   | H7               | 3.233    |
| C5   | H10A             | 2.638    | C5   | H10C             | 3.326    |
| C5   | H11A             | 3.326    | C5   | H11C             | 2.721    |
| C5   | H14B             | 3.436    | C5   | H15A             | 2.661    |
| C5   | H15B             | 2.769    | C6   | H9A              | 2.672    |
| C6   | H9B              | 2.767    | C6   | H9C              | 3.365    |
| C6   | H10A             | 2.624    | C6   | H10B             | 3.341    |
| C6   | H10C             | 2.738    | C6   | H11A             | 2.690    |
| C6   | H11B             | 3.355    | C6   | H11C             | 2.664    |
| C7   | H1A              | 3.160    | C7   | H1A <sup>1</sup> | 2.791    |

Table S10-10. Intramolecular contacts less than 3.60 Å involving hydrogens (continued)

| atom | atom              | distance | atom | atom              | distance |
|------|-------------------|----------|------|-------------------|----------|
| C7   | H1B               | 3.177    | C7   | H5                | 3.226    |
| C7   | H7 <sup>1</sup>   | 3.575    | C7   | H7 <sup>2</sup>   | 2.991    |
| C7   | H9A               | 2.688    | C7   | H9A <sup>2</sup>  | 3.503    |
| C7   | H9B               | 2.835    | C7   | H9B <sup>2</sup>  | 3.355    |
| C7   | H10C              | 3.597    | C7   | H11A              | 3.467    |
| C7   | H16 <sup>1</sup>  | 3.502    | C7   | H17 <sup>1</sup>  | 3.401    |
| C8   | H5                | 2.672    | C8   | H7                | 2.689    |
| C9   | H7                | 2.467    | C9   | H9A <sup>1</sup>  | 3.562    |
| C9   | H10A              | 3.319    | C9   | H10B              | 2.686    |
| C9   | H10C              | 2.686    | C9   | H11A              | 2.625    |
| C9   | H11A <sup>1</sup> | 3.263    | C9   | H11B              | 2.637    |
| C9   | H11C              | 3.298    | C9   | H16 <sup>1</sup>  | 3.502    |
| C10  | H5                | 2.784    | C10  | H9A               | 3.318    |
| C10  | H9B               | 2.686    | C10  | H9C               | 2.686    |
| C10  | H11A              | 3.294    | C10  | H11B              | 2.624    |
| C10  | H11C              | 2.624    | C10  | H16 <sup>1</sup>  | 3.497    |
| C11  | H5                | 2.901    | C11  | H9A               | 2.642    |
| C11  | H9B               | 3.312    | C11  | H9C               | 2.583    |
| C11  | H10A              | 2.633    | C11  | H10B              | 2.577    |
| C11  | H10C              | 3.307    | C12  | H5                | 2.688    |
| C13  | H14A              | 2.752    | C13  | H14B              | 3.379    |
| C13  | H14C              | 2.703    | C13  | H15A              | 3.328    |
| C13  | H15B              | 2.647    | C13  | H15C              | 2.647    |
| C14  | H13A              | 2.749    | C14  | H13B              | 2.699    |
| C14  | H13C              | 3.382    | C14  | H15A              | 2.667    |
| C14  | H15B              | 3.342    | C14  | H15C              | 2.649    |
| C14  | H20               | 3.204    | C15  | H5                | 2.413    |
| C15  | H13A              | 3.327    | C15  | H13B              | 2.647    |
| C15  | H13C              | 2.647    | C15  | H14A              | 3.339    |
| C15  | H14B              | 2.662    | C15  | H14C              | 2.662    |
| C16  | H1A               | 3.028    | C16  | H10C <sup>2</sup> | 3.219    |
| C16  | H14A              | 3.463    | C16  | H18               | 3.112    |
| C16  | H19               | 3.118    | C17  | H1A               | 2.827    |
| C17  | H19               | 3.199    | C17  | H20               | 3.012    |
| C18  | H16               | 3.120    | C18  | H20               | 3.179    |
| C19  | H16               | 3.119    | C19  | H17               | 3.196    |
| C20  | H14A              | 2.875    | C20  | H17               | 3.016    |



Table S10-10. Intramolecular contacts less than 3.60 Å involving hydrogens (continued)

| atom | atom              | distance | atom | atom              | distance |
|------|-------------------|----------|------|-------------------|----------|
| C20  | H18               | 3.179    | H1A  | H1A <sup>1</sup>  | 3.420    |
| H1A  | H1A <sup>2</sup>  | 3.420    | H1A  | H1B <sup>1</sup>  | 3.571    |
| H1A  | H1B <sup>2</sup>  | 2.403    | H1A  | H7                | 3.332    |
| H1A  | H7 <sup>2</sup>   | 2.521    | H1A  | H16               | 2.805    |
| H1A  | H17               | 2.411    | H1B  | H1B <sup>1</sup>  | 2.639    |
| H1B  | H1B <sup>2</sup>  | 2.639    | H1B  | H7                | 3.381    |
| H1B  | H17 <sup>1</sup>  | 3.598    | H5   | H10A              | 2.156    |
| H5   | H10B              | 3.566    | H5   | H10C              | 3.260    |
| H5   | H11A              | 3.375    | H5   | H11C              | 2.331    |
| H5   | H14B              | 3.457    | H5   | H15A              | 2.060    |
| H5   | H15B              | 2.312    | H5   | H15C              | 3.370    |
| H7   | H7 <sup>1</sup>   | 2.683    | H7   | H7 <sup>2</sup>   | 2.683    |
| H7   | H9A               | 2.179    | H7   | H9A <sup>2</sup>  | 3.239    |
| H7   | H9B               | 2.307    | H7   | H9B <sup>2</sup>  | 3.505    |
| H7   | H9C               | 3.433    | H7   | H16 <sup>1</sup>  | 3.275    |
| H9A  | H9A <sup>1</sup>  | 2.748    | H9A  | H9A <sup>2</sup>  | 2.748    |
| H9A  | H10B              | 3.571    | H9A  | H10C              | 3.572    |
| H9A  | H11A              | 2.444    | H9A  | H11A <sup>1</sup> | 3.043    |
| H9A  | H11B              | 2.950    | H9A  | H11C              | 3.529    |
| H9B  | H10A              | 3.572    | H9B  | H10B              | 2.984    |
| H9B  | H10C              | 2.519    | H9B  | H11A              | 3.544    |
| H9B  | H11A <sup>1</sup> | 3.238    | H9B  | H11B              | 3.526    |
| H9B  | H16 <sup>1</sup>  | 2.647    | H9C  | H10A              | 3.572    |
| H9C  | H10B              | 2.519    | H9C  | H10C              | 2.984    |
| H9C  | H11A              | 2.847    | H9C  | H11A <sup>1</sup> | 2.961    |
| H9C  | H11B              | 2.393    | H9C  | H11C              | 3.489    |
| H10A | H11A              | 3.524    | H10A | H11B              | 2.932    |
| H10A | H11C              | 2.439    | H10B | H11A              | 3.481    |
| H10B | H11B              | 2.379    | H10B | H11C              | 2.850    |
| H10C | H11B              | 3.517    | H10C | H11C              | 3.542    |
| H10C | H16 <sup>1</sup>  | 2.640    | H13A | H14A              | 2.603    |
| H13A | H14C              | 3.009    | H13A | H15B              | 3.546    |
| H13A | H15C              | 3.546    | H13B | H14A              | 3.010    |
| H13B | H14B              | 3.583    | H13B | H14C              | 2.496    |
| H13B | H15A              | 3.547    | H13B | H15B              | 2.924    |
| H13B | H15C              | 2.448    | H13C | H14C              | 3.588    |
| H13C | H15A              | 3.547    | H13C | H15B              | 2.448    |

Table S10-10. Intramolecular contacts less than 3.60 Å involving hydrogens (continued)

| atom | atom | distance | atom | atom | distance |
|------|------|----------|------|------|----------|
| H13C | H15C | 2.925    | H14A | H15A | 3.563    |
| H14A | H15C | 3.549    | H14A | H16  | 3.579    |
| H14A | H20  | 2.435    | H14B | H15A | 2.472    |
| H14B | H15B | 3.567    | H14B | H15C | 2.923    |
| H14B | H20  | 3.155    | H14C | H15A | 2.950    |
| H14C | H15B | 3.558    | H14C | H15C | 2.453    |
| H16  | H17  | 2.342    | H16  | H20  | 2.370    |
| H17  | H18  | 2.590    | H18  | H19  | 2.682    |
| H19  | H20  | 2.550    |      |      |          |

Symmetry Operators:

(1)  $-Y+1, X-Y, Z$

(2)  $-X+Y+1, -X+1, Z$

Table S10-11. Intermolecular contacts less than 3.60 Å

| atom | atom             | distance | atom | atom             | distance  |
|------|------------------|----------|------|------------------|-----------|
| Cl2  | O1 <sup>1</sup>  | 3.288(3) | Cl2  | C3 <sup>1</sup>  | 3.532(4)  |
| O1   | Cl2 <sup>2</sup> | 3.288(3) | C3   | Cl2 <sup>2</sup> | 3.532(4)  |
| C15  | C17 <sup>3</sup> | 3.489(9) | C15  | C18 <sup>3</sup> | 3.408(10) |
| C17  | C15 <sup>4</sup> | 3.489(9) | C18  | C15 <sup>4</sup> | 3.408(10) |

Symmetry Operators:

- |                     |                    |
|---------------------|--------------------|
| (1) Y+1,-X+Y+1,-Z+2 | (2) X-Y+1,X,-Z+2   |
| (3) Y,-X+Y+1,-Z+2   | (4) X-Y+1,X+1,-Z+2 |

Table S10-12. Intermolecular contacts less than 3.60 Å involving hydrogens

| atom | atom              | distance | atom | atom              | distance |
|------|-------------------|----------|------|-------------------|----------|
| Cl1  | H5 <sup>1</sup>   | 3.441    | Cl1  | H10A <sup>1</sup> | 3.584    |
| Cl1  | H11C <sup>1</sup> | 3.158    | Cl1  | H15A <sup>1</sup> | 3.060    |
| Cl1  | H18 <sup>2</sup>  | 2.839    | Cl2  | H1B <sup>3</sup>  | 2.818    |
| Cl2  | H13A <sup>3</sup> | 3.256    | Cl2  | H13C <sup>3</sup> | 3.456    |
| Cl2  | H17 <sup>2</sup>  | 3.001    | C10  | H13B <sup>4</sup> | 3.097    |
| C10  | H13C <sup>4</sup> | 3.508    | C10  | H19 <sup>5</sup>  | 3.430    |
| C13  | H10A <sup>4</sup> | 3.132    | C13  | H10C <sup>4</sup> | 3.585    |
| C13  | H18 <sup>2</sup>  | 3.271    | C15  | H15B <sup>4</sup> | 3.484    |
| C15  | H17 <sup>6</sup>  | 3.515    | C15  | H18 <sup>6</sup>  | 3.332    |
| C16  | H15C <sup>7</sup> | 3.075    | C17  | H15C <sup>7</sup> | 2.720    |
| C18  | H13A <sup>3</sup> | 3.343    | C18  | H15A <sup>7</sup> | 3.179    |
| C18  | H15C <sup>7</sup> | 2.777    | C19  | H15C <sup>7</sup> | 3.250    |
| C20  | H15C <sup>7</sup> | 3.362    | H1B  | Cl2 <sup>2</sup>  | 2.818    |
| H5   | Cl1 <sup>5</sup>  | 3.441    | H5   | H13C <sup>4</sup> | 3.378    |
| H10A | Cl1 <sup>5</sup>  | 3.584    | H10A | C13 <sup>4</sup>  | 3.132    |
| H10A | H13B <sup>4</sup> | 2.681    | H10A | H13C <sup>4</sup> | 2.700    |
| H10A | H19 <sup>5</sup>  | 3.170    | H10B | H13B <sup>4</sup> | 3.344    |
| H10B | H19 <sup>5</sup>  | 2.805    | H10C | C13 <sup>4</sup>  | 3.585    |
| H10C | H13B <sup>4</sup> | 2.796    | H10C | H13C <sup>4</sup> | 3.529    |
| H10C | H15C <sup>4</sup> | 3.368    | H11B | H19 <sup>5</sup>  | 3.326    |
| H11C | Cl1 <sup>5</sup>  | 3.158    | H11C | H19 <sup>5</sup>  | 3.557    |
| H13A | Cl2 <sup>2</sup>  | 3.256    | H13A | C18 <sup>2</sup>  | 3.343    |
| H13A | H18 <sup>2</sup>  | 2.573    | H13B | C10 <sup>4</sup>  | 3.097    |
| H13B | H10A <sup>4</sup> | 2.681    | H13B | H10B <sup>4</sup> | 3.344    |
| H13B | H10C <sup>4</sup> | 2.796    | H13B | H18 <sup>2</sup>  | 3.302    |
| H13C | Cl2 <sup>2</sup>  | 3.456    | H13C | C10 <sup>4</sup>  | 3.508    |
| H13C | H5 <sup>4</sup>   | 3.378    | H13C | H10A <sup>4</sup> | 2.700    |
| H13C | H10C <sup>4</sup> | 3.529    | H13C | H15B <sup>4</sup> | 2.779    |
| H13C | H18 <sup>2</sup>  | 3.480    | H15A | Cl1 <sup>5</sup>  | 3.060    |
| H15A | C18 <sup>6</sup>  | 3.179    | H15A | H18 <sup>6</sup>  | 2.837    |
| H15B | C15 <sup>4</sup>  | 3.484    | H15B | H13C <sup>4</sup> | 2.779    |
| H15B | H15B <sup>4</sup> | 2.558    | H15B | H17 <sup>6</sup>  | 3.448    |
| H15C | C16 <sup>6</sup>  | 3.075    | H15C | C17 <sup>6</sup>  | 2.720    |
| H15C | C18 <sup>6</sup>  | 2.777    | H15C | C19 <sup>6</sup>  | 3.250    |
| H15C | C20 <sup>6</sup>  | 3.362    | H15C | H10C <sup>4</sup> | 3.368    |
| H15C | H16 <sup>6</sup>  | 3.545    | H15C | H17 <sup>6</sup>  | 2.908    |
| H15C | H18 <sup>6</sup>  | 2.972    | H16  | H15C <sup>7</sup> | 3.545    |

Table S10-12. Intermolecular contacts less than 3.60 Å involving hydrogens (continued)

| atom | atom              | distance | atom | atom              | distance |
|------|-------------------|----------|------|-------------------|----------|
| H17  | C12 <sup>3</sup>  | 3.001    | H17  | C15 <sup>7</sup>  | 3.515    |
| H17  | H15B <sup>7</sup> | 3.448    | H17  | H15C <sup>7</sup> | 2.908    |
| H18  | C11 <sup>3</sup>  | 2.839    | H18  | C13 <sup>3</sup>  | 3.271    |
| H18  | C15 <sup>7</sup>  | 3.332    | H18  | H13A <sup>3</sup> | 2.573    |
| H18  | H13B <sup>3</sup> | 3.302    | H18  | H13C <sup>3</sup> | 3.480    |
| H18  | H15A <sup>7</sup> | 2.837    | H18  | H15C <sup>7</sup> | 2.972    |
| H19  | C10 <sup>1</sup>  | 3.430    | H19  | H10A <sup>1</sup> | 3.170    |
| H19  | H10B <sup>1</sup> | 2.805    | H19  | H11B <sup>1</sup> | 3.326    |
| H19  | H11C <sup>1</sup> | 3.557    |      |                   |          |

Symmetry Operators:

- |                                 |                        |
|---------------------------------|------------------------|
| (1) $-Y+2/3, X-Y+1/3, Z+1/3$    | (2) $X-Y+1, X, -Z+2$   |
| (3) $Y+1, -X+Y+1, -Z+2$         | (4) $-X+1, -Y+1, -Z+2$ |
| (5) $-X+Y+1/3, -X+2/3, Z+2/3-1$ | (6) $Y, -X+Y+1, -Z+2$  |
| (7) $X-Y+1, X+1, -Z+2$          |                        |

X-ray Structure Report

for

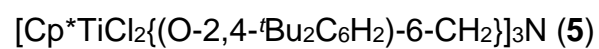

April 7, 2017

## Experimental

### Data Collection

A red block crystal of  $C_{75}H_{111}Cl_6NO_3Ti_3$  having approximate dimensions of 0.230 x 0.190 x 0.100 mm was mounted on a glass fiber. All measurements were made on a Rigaku XtaLAB mini diffractometer using multi-layer mirror monochromated Mo-K $\alpha$  radiation.

The crystal-to-detector distance was 50.00 mm.

Cell constants and an orientation matrix for data collection corresponded to a primitive monoclinic cell with dimensions:

$$\begin{aligned} a &= 17.5836(9) \text{ \AA} \\ b &= 22.4075(10) \text{ \AA} & \beta &= 94.814(4)^\circ \\ c &= 21.6663(10) \text{ \AA} \\ V &= 8506.5(7) \text{ \AA}^3 \end{aligned}$$

For  $Z = 4$  and F.W. = 1431.12, the calculated density is 1.117 g/cm<sup>3</sup>. The reflection conditions of:

$$\begin{aligned} h0l: & h+l = 2n \\ 0k0: & k = 2n \end{aligned}$$

uniquely determine the space group to be:

$$P2_1/n \text{ (#14)}$$

The data were collected at a temperature of  $-180 \pm 1^\circ\text{C}$  to a maximum  $2\theta$  value of  $65.3^\circ$ . A total of 540 oscillation images were collected. A sweep of data was done using  $\omega$  scans from  $-60.0$  to  $120.0^\circ$  in  $1.00^\circ$  step, at  $\chi=54.0^\circ$  and  $\phi = 0.0^\circ$ . The exposure rate was 32.0 [sec./ $^\circ$ ]. The detector swing angle was  $30.00^\circ$ . A second sweep was performed using  $\omega$  scans from  $-60.0$  to  $120.0^\circ$  in  $1.00^\circ$  step, at  $\chi=54.0^\circ$  and  $\phi = 120.0^\circ$ . The exposure rate was 32.0 [sec./ $^\circ$ ]. The detector swing angle was  $30.00^\circ$ . Another sweep was performed using  $\omega$  scans from  $-60.0$  to  $120.0^\circ$  in  $1.00^\circ$  step, at  $\chi=54.0^\circ$  and  $\phi = 240.0^\circ$ . The exposure rate was 32.0 [sec./ $^\circ$ ]. The detector swing angle was  $30.00^\circ$ . The crystal-to-detector distance was 50.00 mm. Readout was performed

in the 0.073 mm pixel mode.

### Data Reduction

Of the 89388 reflections were collected, where 19531 were unique ( $R_{\text{int}} = 0.1354$ ); equivalent reflections were merged. Data were collected and processed using CrysAlisPro (Rigaku Oxford Diffraction).<sup>1</sup>

The linear absorption coefficient,  $\mu$ , for Mo-K $\alpha$  radiation is 5.028 cm<sup>-1</sup>. An empirical absorption correction was applied which resulted in transmission factors ranging from 0.929 to 0.951. The data were corrected for Lorentz and polarization effects.

### Structure Solution and Refinement

The structure was solved by direct methods<sup>2</sup> and expanded using Fourier techniques. The non-hydrogen atoms were refined anisotropically. Hydrogen atoms were refined using the riding model. The final cycle of full-matrix least-squares refinement<sup>3</sup> on  $F^2$  was based on 19531 observed reflections and 793 variable parameters and converged (largest parameter shift was 0.00 times its esd) with unweighted and weighted agreement factors of:

$$R1 = \Sigma ||F_o| - |F_c|| / \Sigma |F_o| = 0.0757$$

$$wR2 = [ \Sigma ( w (F_o^2 - F_c^2)^2 ) / \Sigma w(F_o^2)^2 ]^{1/2} = 0.2209$$

The goodness of fit<sup>4</sup> was 0.94. Unit weights were used. The maximum and minimum peaks on the final difference Fourier map corresponded to 1.23 and -0.55 e<sup>-</sup>Å<sup>3</sup>, respectively.

Neutral atom scattering factors were taken from International Tables for Crystallography (IT), Vol. C, Table 6.1.1.4<sup>5</sup>. Anomalous dispersion effects were included in  $F_{\text{calc}}$ <sup>6</sup>; the values for  $\Delta f'$  and  $\Delta f''$  were those of Creagh and McAuley<sup>7</sup>. The values for the mass attenuation coefficients are those of Creagh and Hubbell<sup>8</sup>. All calculations were performed using the CrystalStructure<sup>9</sup> crystallographic software package except for refinement, which was performed using SHELXL Version 2014/7<sup>10</sup>.



## References

(1) CrysAlisPro: Data Collection and Processing Software, Rigaku Corporation (2015). Tokyo 196-8666, Japan.

(2) SHELXT: Sheldrick, G. M. (2014). Acta Cryst. A70, C1437.

(3) Least Squares function minimized: (SHELXL Version 2014/7)

$$\sum w(F_o^2 - F_c^2)^2 \quad \text{where } w = \text{Least Squares weights.}$$

(4) Goodness of fit is defined as:

$$[\sum w(F_o^2 - F_c^2)^2 / (N_o - N_v)]^{1/2}$$

where:  $N_o$  = number of observations  
 $N_v$  = number of variables

(5) International Tables for Crystallography, Vol.C (1992). Ed. A.J.C. Wilson, Kluwer Academic Publishers, Dordrecht, Netherlands, Table 6.1.1.4, pp. 572.

(6) Ibers, J. A. & Hamilton, W. C.; Acta Crystallogr., 17, 781 (1964).

(7) Creagh, D. C. & McAuley, W.J. ; "International Tables for Crystallography", Vol C, (A.J.C. Wilson, ed.), Kluwer Academic Publishers, Boston, Table 4.2.6.8, pages 219-222 (1992).

(8) Creagh, D. C. & Hubbell, J.H.; "International Tables for Crystallography", Vol C, (A.J.C. Wilson, ed.), Kluwer Academic Publishers, Boston, Table 4.2.4.3, pages 200-206 (1992).

(9) CrystalStructure 4.2: Crystal Structure Analysis Package, Rigaku Corporation (2000-2015). Tokyo 196-8666, Japan.

(10) SHELXL Version 2014/7: Sheldrick, G. M. (2008). Acta Cryst. A64, 112-122.

## EXPERIMENTAL DETAILS

### A. Crystal Data

|                         |                                                                                                                                                              |
|-------------------------|--------------------------------------------------------------------------------------------------------------------------------------------------------------|
| Empirical Formula       | $C_{75}H_{111}Cl_6NO_3Ti_3$                                                                                                                                  |
| Formula Weight          | 1431.12                                                                                                                                                      |
| Crystal Color, Habit    | red, block                                                                                                                                                   |
| Crystal Dimensions      | 0.230 X 0.190 X 0.100 mm                                                                                                                                     |
| Crystal System          | monoclinic                                                                                                                                                   |
| Lattice Type            | Primitive                                                                                                                                                    |
| Lattice Parameters      | $a = 17.5836(9) \text{ \AA}$<br>$b = 22.4075(10) \text{ \AA}$<br>$c = 21.6663(10) \text{ \AA}$<br>$\beta = 94.814(4)^\circ$<br>$V = 8506.5(7) \text{ \AA}^3$ |
| Space Group             | $P2_1/n$ (#14)                                                                                                                                               |
| Z value                 | 4                                                                                                                                                            |
| $D_{\text{calc}}$       | $1.117 \text{ g/cm}^3$                                                                                                                                       |
| $F_{000}$               | 3040.00                                                                                                                                                      |
| $\mu(\text{MoK}\alpha)$ | $5.028 \text{ cm}^{-1}$                                                                                                                                      |

## B. Intensity Measurements

|                                                        |                                                                                      |
|--------------------------------------------------------|--------------------------------------------------------------------------------------|
| Diffractometer                                         | XtaLAB mini                                                                          |
| Radiation                                              | MoK $\alpha$ ( $\lambda = 0.71073 \text{ \AA}$ )<br>multi-layer mirror monochromated |
| Voltage, Current                                       | 50kV, 24mA                                                                           |
| Temperature                                            | -180.0 $^{\circ}$ C                                                                  |
| Detector Aperture                                      | 75.0 mm (diameter)                                                                   |
| Data Images                                            | 540 exposures                                                                        |
| $\omega$ oscillation Range ( $\chi=54.0, \phi=0.0$ )   | -60.0 - 120.0 $^{\circ}$                                                             |
| Exposure Rate                                          | 32.0 sec./ $^{\circ}$                                                                |
| Detector Swing Angle                                   | 30.00 $^{\circ}$                                                                     |
| $\omega$ oscillation Range ( $\chi=54.0, \phi=120.0$ ) | -60.0 - 120.0 $^{\circ}$                                                             |
| Exposure Rate                                          | 32.0 sec./ $^{\circ}$                                                                |
| Detector Swing Angle                                   | 30.00 $^{\circ}$                                                                     |
| $\omega$ oscillation Range ( $\chi=54.0, \phi=240.0$ ) | -60.0 - 120.0 $^{\circ}$                                                             |
| Exposure Rate                                          | 32.0 sec./ $^{\circ}$                                                                |
| Detector Swing Angle                                   | 30.00 $^{\circ}$                                                                     |
| Detector Position                                      | 50.00 mm                                                                             |
| Pixel Size                                             | 0.073 mm                                                                             |
| $2\theta_{\max}$                                       | 55.0 $^{\circ}$                                                                      |
| No. of Reflections Measured                            | Total: 89388                                                                         |

Corrections

Unique: 19531 ( $R_{\text{int}} = 0.1354$ )

Lorentz-polarization

Absorption

(trans. factors: 0.929 - 0.951)

### C. Structure Solution and Refinement

|                                       |                                                                                                                      |
|---------------------------------------|----------------------------------------------------------------------------------------------------------------------|
| Structure Solution                    | Direct Methods (SHELXT)                                                                                              |
| Refinement                            | Full-matrix least-squares on $F^2$                                                                                   |
| Function Minimized                    | $\sum w (F_o^2 - F_c^2)^2$                                                                                           |
| Least Squares Weights                 | $w = 1 / [ \sigma^2(F_o^2) + (0.1099 \cdot P)^2 + 0.0000 \cdot P ]$<br>where $P = (\text{Max}(F_o^2, 0) + 2F_c^2)/3$ |
| $2\theta_{\text{max}}$ cutoff         | 55.0°                                                                                                                |
| Anomalous Dispersion                  | All non-hydrogen atoms                                                                                               |
| No. Observations (All reflections)    | 19531                                                                                                                |
| No. Variables                         | 793                                                                                                                  |
| Reflection/Parameter Ratio            | 24.63                                                                                                                |
| Residuals: R1 ( $I > 2.00\sigma(I)$ ) | 0.0757                                                                                                               |
| Residuals: R (All reflections)        | 0.1382                                                                                                               |
| Residuals: wR2 (All reflections)      | 0.2209                                                                                                               |
| Goodness of Fit Indicator             | 0.945                                                                                                                |
| Max Shift/Error in Final Cycle        | 0.001                                                                                                                |
| Maximum peak in Final Diff. Map       | 1.23 e <sup>-</sup> /Å <sup>3</sup>                                                                                  |
| Minimum peak in Final Diff. Map       | -0.55 e <sup>-</sup> /Å <sup>3</sup>                                                                                 |

Table S11-1. Atomic coordinates and  $B_{\text{iso}}/B_{\text{eq}}$ 

| atom | x           | y            | z           | $B_{\text{eq}}$ |
|------|-------------|--------------|-------------|-----------------|
| Ti1  | 0.48107(4)  | 0.07514(3)   | 0.25411(4)  | 1.319(14)       |
| Ti2  | 0.65054(5)  | 0.29990(4)   | 0.47561(4)  | 1.480(15)       |
| Ti3  | 0.81685(4)  | 0.25585(3)   | 0.19045(4)  | 1.433(15)       |
| Cl1  | 0.58178(7)  | 0.09334(5)   | 0.32349(5)  | 2.24(2)         |
| Cl2  | 0.42210(7)  | 0.00010(5)   | 0.30188(6)  | 2.26(2)         |
| Cl3  | 0.70457(7)  | 0.23047(5)   | 0.41751(5)  | 2.10(2)         |
| Cl4  | 0.75169(7)  | 0.33116(6)   | 0.53902(6)  | 2.47(2)         |
| Cl5  | 0.88700(7)  | 0.19674(5)   | 0.13181(6)  | 2.34(2)         |
| Cl6  | 0.78373(7)  | 0.19132(5)   | 0.26341(6)  | 2.08(2)         |
| O1   | 0.42014(16) | 0.13792(12)  | 0.26351(13) | 1.39(5)         |
| O2   | 0.63557(17) | 0.36217(13)  | 0.42411(13) | 1.58(5)         |
| O3   | 0.73059(16) | 0.26516(13)  | 0.14145(13) | 1.44(5)         |
| N1   | 0.54732(19) | 0.29758(15)  | 0.25114(16) | 1.27(6)         |
| C1   | 0.5093(2)   | 0.23923(18)  | 0.2472(2)   | 1.32(7)         |
| C2   | 0.4263(2)   | 0.24401(18)  | 0.25743(19) | 1.27(7)         |
| C3   | 0.3826(3)   | 0.19179(19)  | 0.26434(19) | 1.50(8)         |
| C4   | 0.3035(2)   | 0.19508(18)  | 0.27205(19) | 1.23(7)         |
| C5   | 0.2728(3)   | 0.2523(2)    | 0.2748(2)   | 1.65(8)         |
| C6   | 0.3141(3)   | 0.3043(2)    | 0.2698(2)   | 1.76(8)         |
| C7   | 0.3912(3)   | 0.2985(2)    | 0.2599(2)   | 1.76(8)         |
| C8   | 0.2797(3)   | 0.3672(2)    | 0.2740(2)   | 2.04(9)         |
| C9   | 0.2893(3)   | 0.4024(2)    | 0.2144(3)   | 3.23(11)        |
| C10  | 0.3219(3)   | 0.4003(2)    | 0.3291(3)   | 3.54(12)        |
| C11  | 0.1958(3)   | 0.3653(2)    | 0.2833(3)   | 2.85(10)        |
| C12  | 0.2541(2)   | 0.1399(2)    | 0.2804(2)   | 1.68(8)         |
| C13  | 0.2594(3)   | 0.0969(2)    | 0.2252(2)   | 1.94(8)         |
| C14  | 0.2807(3)   | 0.1084(2)    | 0.3415(2)   | 2.48(9)         |
| C15  | 0.1693(3)   | 0.1558(2)    | 0.2819(2)   | 2.27(9)         |
| C16  | 0.4784(3)   | 0.09386(18)  | 0.1473(2)   | 1.38(7)         |
| C17  | 0.5569(3)   | 0.09116(19)  | 0.1696(2)   | 1.54(8)         |
| C18  | 0.5738(3)   | 0.03206(19)  | 0.1910(2)   | 1.58(8)         |
| C19  | 0.5068(3)   | -0.00175(19) | 0.1811(2)   | 1.73(8)         |
| C20  | 0.4473(3)   | 0.03569(19)  | 0.1549(2)   | 1.50(8)         |
| C21  | 0.4371(3)   | 0.1461(2)    | 0.1173(2)   | 1.93(8)         |
| C22  | 0.6163(3)   | 0.1393(2)    | 0.1662(2)   | 2.13(9)         |
| C23  | 0.6503(3)   | 0.0107(2)    | 0.2144(2)   | 2.36(9)         |
| C24  | 0.4999(3)   | -0.0676(2)   | 0.1921(2)   | 2.48(9)         |

Table S11-1. Atomic coordinates and  $B_{\text{iso}}/B_{\text{eq}}$  (continued)

| atom | x         | y           | z           | $B_{\text{eq}}$ |
|------|-----------|-------------|-------------|-----------------|
| C25  | 0.3692(3) | 0.0163(2)   | 0.1314(2)   | 2.50(9)         |
| C26  | 0.5634(2) | 0.31545(18) | 0.31551(19) | 1.26(7)         |
| C27  | 0.5791(2) | 0.38069(19) | 0.32259(19) | 1.39(7)         |
| C28  | 0.6161(3) | 0.40291(19) | 0.3782(2)   | 1.39(7)         |
| C29  | 0.6340(3) | 0.4643(2)   | 0.3850(2)   | 1.90(8)         |
| C30  | 0.6126(3) | 0.5009(2)   | 0.3342(2)   | 2.12(9)         |
| C31  | 0.5759(3) | 0.4806(2)   | 0.2789(2)   | 1.83(8)         |
| C32  | 0.5598(3) | 0.4203(2)   | 0.2749(2)   | 1.79(8)         |
| C33  | 0.5580(3) | 0.5239(2)   | 0.2246(2)   | 2.74(9)         |
| C34  | 0.5066(5) | 0.4986(3)   | 0.1751(4)   | 7.00(18)        |
| C35  | 0.6333(4) | 0.5387(4)   | 0.1950(4)   | 6.08(16)        |
| C36  | 0.5329(4) | 0.5832(3)   | 0.2450(3)   | 4.38(13)        |
| C37  | 0.6765(3) | 0.4900(2)   | 0.4438(2)   | 2.32(9)         |
| C38  | 0.7578(3) | 0.4630(2)   | 0.4510(2)   | 2.88(11)        |
| C39  | 0.6872(4) | 0.5576(2)   | 0.4404(3)   | 3.96(14)        |
| C40  | 0.6338(3) | 0.4761(2)   | 0.5008(2)   | 2.87(10)        |
| C41  | 0.5240(2) | 0.3028(2)   | 0.5019(2)   | 1.47(7)         |
| C42  | 0.5354(3) | 0.2454(2)   | 0.4776(2)   | 1.81(8)         |
| C43  | 0.5896(3) | 0.2152(2)   | 0.5178(2)   | 2.13(9)         |
| C44  | 0.6129(3) | 0.2536(2)   | 0.5677(2)   | 2.02(8)         |
| C45  | 0.5724(3) | 0.3082(2)   | 0.5572(2)   | 1.71(8)         |
| C46  | 0.4679(3) | 0.3486(2)   | 0.4756(2)   | 2.16(9)         |
| C47  | 0.4905(3) | 0.2166(2)   | 0.4230(2)   | 2.39(9)         |
| C48  | 0.6144(3) | 0.1513(2)   | 0.5117(3)   | 3.05(11)        |
| C49  | 0.6678(3) | 0.2377(3)   | 0.6211(2)   | 2.96(10)        |
| C50  | 0.5755(3) | 0.3598(2)   | 0.6017(2)   | 2.21(9)         |
| C51  | 0.6181(2) | 0.2962(2)   | 0.21945(19) | 1.36(7)         |
| C52  | 0.6034(2) | 0.29802(18) | 0.1498(2)   | 1.39(7)         |
| C53  | 0.6614(2) | 0.28179(18) | 0.11246(19) | 1.19(7)         |
| C54  | 0.6479(3) | 0.28041(19) | 0.0472(2)   | 1.57(8)         |
| C55  | 0.5756(3) | 0.2987(2)   | 0.0226(2)   | 1.89(8)         |
| C56  | 0.5174(3) | 0.3165(2)   | 0.0587(2)   | 1.70(8)         |
| C57  | 0.5326(3) | 0.31592(19) | 0.1229(2)   | 1.45(7)         |
| C58  | 0.4393(3) | 0.3345(3)   | 0.0277(2)   | 2.84(9)         |
| C59  | 0.3857(4) | 0.3551(4)   | 0.0717(3)   | 5.52(15)        |
| C60  | 0.4068(4) | 0.2787(3)   | -0.0072(4)  | 5.79(15)        |
| C61  | 0.4479(4) | 0.3833(4)   | -0.0203(4)  | 6.37(17)        |

Table S11-1. Atomic coordinates and  $B_{iso}/B_{eq}$  (continued)

| atom | x         | y           | z          | $B_{eq}$ |
|------|-----------|-------------|------------|----------|
| C62  | 0.7066(3) | 0.2574(2)   | 0.0040(2)  | 1.88(8)  |
| C63  | 0.7233(3) | 0.1920(2)   | 0.0188(2)  | 2.29(9)  |
| C64  | 0.6769(3) | 0.2616(2)   | -0.0640(2) | 2.79(10) |
| C65  | 0.7803(3) | 0.2951(2)   | 0.0120(2)  | 2.46(9)  |
| C66  | 0.8344(3) | 0.35913(19) | 0.1985(2)  | 1.97(8)  |
| C67  | 0.9019(3) | 0.3349(2)   | 0.1767(2)  | 2.36(9)  |
| C68  | 0.9374(3) | 0.2989(2)   | 0.2250(3)  | 2.49(10) |
| C69  | 0.8933(3) | 0.3000(2)   | 0.2751(2)  | 1.92(8)  |
| C70  | 0.8291(2) | 0.33754(19) | 0.2603(2)  | 1.53(8)  |
| C71  | 0.7811(3) | 0.4016(2)   | 0.1638(3)  | 3.11(11) |
| C72  | 0.9343(4) | 0.3493(3)   | 0.1179(3)  | 4.52(15) |
| C73  | 1.0117(3) | 0.2651(3)   | 0.2249(4)  | 4.79(16) |
| C74  | 0.9115(4) | 0.2723(3)   | 0.3372(3)  | 3.50(12) |
| C75  | 0.7737(3) | 0.3559(2)   | 0.3049(2)  | 2.49(10) |

$$B_{eq} = 8/3 \pi^2 (U_{11}(aa^*)^2 + U_{22}(bb^*)^2 + U_{33}(cc^*)^2 + 2U_{12}(aa^*bb^*)\cos \gamma + 2U_{13}(aa^*cc^*)\cos \beta + 2U_{23}(bb^*cc^*)\cos \alpha)$$



Table S11-2. Atomic coordinates and  $B_{iso}$  involving hydrogen atoms

| atom | x       | y        | z       | $B_{iso}$ |
|------|---------|----------|---------|-----------|
| H1A  | 0.53462 | 0.21217  | 0.27871 | 1.585     |
| H1B  | 0.51464 | 0.22164  | 0.20590 | 1.585     |
| H5   | 0.21995 | 0.25581  | 0.28043 | 1.979     |
| H7   | 0.42030 | 0.33362  | 0.25467 | 2.115     |
| H9A  | 0.34354 | 0.40427  | 0.20719 | 3.876     |
| H9B  | 0.26106 | 0.38238  | 0.17933 | 3.876     |
| H9C  | 0.26944 | 0.44290  | 0.21852 | 3.876     |
| H10A | 0.37661 | 0.40177  | 0.32346 | 4.253     |
| H10B | 0.30197 | 0.44099  | 0.33128 | 4.253     |
| H10C | 0.31402 | 0.37907  | 0.36760 | 4.253     |
| H11A | 0.18813 | 0.34306  | 0.32122 | 3.417     |
| H11B | 0.17661 | 0.40612  | 0.28702 | 3.417     |
| H11C | 0.16823 | 0.34559  | 0.24783 | 3.417     |
| H13A | 0.22767 | 0.06168  | 0.23081 | 2.330     |
| H13B | 0.24139 | 0.11720  | 0.18663 | 2.330     |
| H13C | 0.31258 | 0.08449  | 0.22305 | 2.330     |
| H14A | 0.24898 | 0.07306  | 0.34668 | 2.971     |
| H14B | 0.33415 | 0.09617  | 0.34060 | 2.971     |
| H14C | 0.27603 | 0.13580  | 0.37623 | 2.971     |
| H15A | 0.13979 | 0.11936  | 0.28723 | 2.725     |
| H15B | 0.16299 | 0.18306  | 0.31646 | 2.725     |
| H15C | 0.15102 | 0.17522  | 0.24287 | 2.725     |
| H21A | 0.47137 | 0.18059  | 0.11812 | 2.317     |
| H21B | 0.42014 | 0.13615  | 0.07429 | 2.317     |
| H21C | 0.39262 | 0.15568  | 0.13989 | 2.317     |
| H22A | 0.59177 | 0.17603  | 0.15015 | 2.554     |
| H22B | 0.64118 | 0.14659  | 0.20766 | 2.554     |
| H22C | 0.65447 | 0.12642  | 0.13853 | 2.554     |
| H23A | 0.68619 | 0.04426  | 0.21662 | 2.829     |
| H23B | 0.64791 | -0.00649 | 0.25576 | 2.829     |
| H23C | 0.66754 | -0.01975 | 0.18627 | 2.829     |
| H24A | 0.44696 | -0.08016 | 0.18153 | 2.973     |
| H24B | 0.53364 | -0.08924 | 0.16611 | 2.973     |
| H24C | 0.51439 | -0.07646 | 0.23579 | 2.973     |
| H25A | 0.33961 | 0.05098  | 0.11583 | 2.998     |
| H25B | 0.37272 | -0.01263 | 0.09780 | 2.998     |
| H25C | 0.34387 | -0.00237 | 0.16511 | 2.998     |

Table S11-2. Atomic coordinates and  $B_{\text{iso}}$  involving hydrogens/ $B_{\text{eq}}$  (continued)

| atom | x       | y       | z       | $B_{\text{eq}}$ |
|------|---------|---------|---------|-----------------|
| H26A | 0.60808 | 0.29283 | 0.33380 | 1.514           |
| H26B | 0.51915 | 0.30498 | 0.33881 | 1.514           |
| H30  | 0.62393 | 0.54230 | 0.33777 | 2.549           |
| H32  | 0.53423 | 0.40534 | 0.23771 | 2.150           |
| H34A | 0.52584 | 0.45953 | 0.16336 | 8.395           |
| H34B | 0.45564 | 0.49399 | 0.18961 | 8.395           |
| H34C | 0.50388 | 0.52529 | 0.13917 | 8.395           |
| H35A | 0.67013 | 0.55595 | 0.22650 | 7.298           |
| H35B | 0.65450 | 0.50201 | 0.17869 | 7.298           |
| H35C | 0.62280 | 0.56734 | 0.16121 | 7.298           |
| H36A | 0.56923 | 0.59811 | 0.27816 | 5.262           |
| H36B | 0.53045 | 0.61097 | 0.20998 | 5.262           |
| H36C | 0.48221 | 0.57967 | 0.26042 | 5.262           |
| H38A | 0.75420 | 0.41939 | 0.45345 | 3.461           |
| H38B | 0.78524 | 0.47407 | 0.41522 | 3.461           |
| H38C | 0.78525 | 0.47829 | 0.48895 | 3.461           |
| H39A | 0.71452 | 0.56748 | 0.40416 | 4.756           |
| H39B | 0.63717 | 0.57713 | 0.43689 | 4.756           |
| H39C | 0.71678 | 0.57148 | 0.47804 | 4.756           |
| H40A | 0.62637 | 0.43290 | 0.50386 | 3.440           |
| H40B | 0.66368 | 0.49043 | 0.53810 | 3.440           |
| H40C | 0.58407 | 0.49607 | 0.49695 | 3.440           |
| H46A | 0.47174 | 0.38451 | 0.50138 | 2.596           |
| H46B | 0.47932 | 0.35869 | 0.43331 | 2.596           |
| H46C | 0.41609 | 0.33234 | 0.47482 | 2.596           |
| H47A | 0.45651 | 0.24626 | 0.40197 | 2.866           |
| H47B | 0.52584 | 0.20140 | 0.39403 | 2.866           |
| H47C | 0.46021 | 0.18359 | 0.43752 | 2.866           |
| H48A | 0.65262 | 0.14144 | 0.54565 | 3.665           |
| H48B | 0.57011 | 0.12493 | 0.51336 | 3.665           |
| H48C | 0.63647 | 0.14591 | 0.47200 | 3.665           |
| H49A | 0.67439 | 0.27191 | 0.64928 | 3.551           |
| H49B | 0.64812 | 0.20363 | 0.64317 | 3.551           |
| H49C | 0.71709 | 0.22724 | 0.60605 | 3.551           |
| H50A | 0.61413 | 0.35181 | 0.63604 | 2.653           |
| H50B | 0.58894 | 0.39628 | 0.58024 | 2.653           |
| H50C | 0.52556 | 0.36479 | 0.61798 | 2.653           |

Table S11-2. Atomic coordinates and  $B_{\text{iso}}$  involving hydrogens/ $B_{\text{eq}}$  (continued)

| atom | x       | y       | z        | $B_{\text{eq}}$ |
|------|---------|---------|----------|-----------------|
| H51A | 0.64678 | 0.25942 | 0.23150  | 1.629           |
| H51B | 0.65024 | 0.33076 | 0.23326  | 1.629           |
| H55  | 0.56547 | 0.29898 | -0.02115 | 2.264           |
| H57  | 0.49412 | 0.32794 | 0.14853  | 1.742           |
| H59A | 0.37969 | 0.32407 | 0.10279  | 6.624           |
| H59B | 0.40552 | 0.39154 | 0.09230  | 6.624           |
| H59C | 0.33603 | 0.36353 | 0.04938  | 6.624           |
| H60A | 0.44274 | 0.26517 | -0.03639 | 6.951           |
| H60B | 0.39902 | 0.24682 | 0.02264  | 6.951           |
| H60C | 0.35786 | 0.28871 | -0.02987 | 6.951           |
| H61A | 0.48356 | 0.37004 | -0.04986 | 7.649           |
| H61B | 0.39808 | 0.39165 | -0.04233 | 7.649           |
| H61C | 0.46758 | 0.41966 | 0.00058  | 7.649           |
| H63A | 0.74255 | 0.18811 | 0.06240  | 2.751           |
| H63B | 0.67636 | 0.16862 | 0.01115  | 2.751           |
| H63C | 0.76179 | 0.17719 | -0.00761 | 2.751           |
| H64A | 0.66565 | 0.30330 | -0.07470 | 3.352           |
| H64B | 0.71567 | 0.24629 | -0.08983 | 3.352           |
| H64C | 0.63024 | 0.23772 | -0.07107 | 3.352           |
| H65A | 0.80132 | 0.29357 | 0.05534  | 2.955           |
| H65B | 0.81784 | 0.27903 | -0.01461 | 2.955           |
| H65C | 0.76869 | 0.33656 | 0.00037  | 2.955           |
| H71A | 0.73912 | 0.41140 | 0.18905  | 3.734           |
| H71B | 0.80869 | 0.43811 | 0.15470  | 3.734           |
| H71C | 0.76056 | 0.38307 | 0.12495  | 3.734           |
| H72A | 0.98109 | 0.32617 | 0.11460  | 5.420           |
| H72B | 0.89720 | 0.33942 | 0.08310  | 5.420           |
| H72C | 0.94624 | 0.39204 | 0.11680  | 5.420           |
| H73A | 1.03301 | 0.27051 | 0.18490  | 5.750           |
| H73B | 1.04793 | 0.28021 | 0.25809  | 5.750           |
| H73C | 1.00250 | 0.22252 | 0.23165  | 5.750           |
| H74A | 0.86990 | 0.28033 | 0.36346  | 4.196           |
| H74B | 0.91754 | 0.22914 | 0.33251  | 4.196           |
| H74C | 0.95906 | 0.28938 | 0.35651  | 4.196           |
| H75A | 0.73462 | 0.38170 | 0.28386  | 2.992           |
| H75B | 0.74943 | 0.32042 | 0.32087  | 2.992           |
| H75C | 0.80055 | 0.37781 | 0.33931  | 2.992           |

Table S11-3. Anisotropic displacement parameters

| atom | U <sub>11</sub> | U <sub>22</sub> | U <sub>33</sub> | U <sub>12</sub> | U <sub>13</sub> | U <sub>23</sub> |
|------|-----------------|-----------------|-----------------|-----------------|-----------------|-----------------|
| Ti1  | 0.0195(4)       | 0.0149(4)       | 0.0157(4)       | 0.0019(3)       | 0.0013(3)       | 0.0001(3)       |
| Ti2  | 0.0202(4)       | 0.0212(4)       | 0.0148(4)       | -0.0000(3)      | 0.0015(3)       | 0.0003(3)       |
| Ti3  | 0.0163(4)       | 0.0178(4)       | 0.0202(4)       | 0.0010(3)       | 0.0006(3)       | -0.0023(3)      |
| Cl1  | 0.0267(6)       | 0.0328(7)       | 0.0242(6)       | 0.0065(5)       | -0.0066(5)      | -0.0041(5)      |
| Cl2  | 0.0373(7)       | 0.0214(6)       | 0.0281(6)       | -0.0002(5)      | 0.0094(5)       | 0.0060(5)       |
| Cl3  | 0.0271(6)       | 0.0297(6)       | 0.0238(6)       | 0.0069(5)       | 0.0059(5)       | -0.0014(5)      |
| Cl4  | 0.0272(6)       | 0.0423(7)       | 0.0229(6)       | -0.0042(6)      | -0.0050(5)      | 0.0016(5)       |
| Cl5  | 0.0252(6)       | 0.0289(6)       | 0.0346(7)       | 0.0073(5)       | 0.0018(5)       | -0.0112(5)      |
| Cl6  | 0.0257(6)       | 0.0235(6)       | 0.0286(6)       | -0.0033(5)      | -0.0035(5)      | 0.0059(5)       |
| O1   | 0.0164(15)      | 0.0158(15)      | 0.0207(16)      | 0.0004(12)      | 0.0034(13)      | 0.0008(13)      |
| O2   | 0.0239(17)      | 0.0203(16)      | 0.0156(16)      | -0.0018(13)     | 0.0010(13)      | -0.0012(13)     |
| O3   | 0.0183(16)      | 0.0170(16)      | 0.0198(16)      | 0.0004(13)      | 0.0040(13)      | 0.0012(12)      |
| N1   | 0.0133(18)      | 0.0169(19)      | 0.0181(19)      | -0.0013(15)     | 0.0012(15)      | -0.0023(15)     |
| C1   | 0.016(2)        | 0.012(2)        | 0.022(2)        | 0.0006(17)      | -0.0008(18)     | -0.0028(17)     |
| C2   | 0.015(2)        | 0.015(2)        | 0.017(2)        | 0.0002(17)      | 0.0003(18)      | -0.0021(17)     |
| C3   | 0.024(2)        | 0.022(2)        | 0.010(2)        | 0.0047(19)      | 0.0001(18)      | -0.0015(17)     |
| C4   | 0.017(2)        | 0.018(2)        | 0.013(2)        | -0.0007(18)     | 0.0028(17)      | -0.0006(17)     |
| C5   | 0.018(2)        | 0.026(3)        | 0.018(2)        | 0.0037(19)      | -0.0008(18)     | 0.0009(19)      |
| C6   | 0.022(2)        | 0.020(2)        | 0.025(3)        | 0.006(2)        | 0.001(2)        | -0.0043(19)     |
| C7   | 0.020(2)        | 0.019(2)        | 0.028(3)        | -0.0003(19)     | 0.002(2)        | -0.004(2)       |
| C8   | 0.024(3)        | 0.018(2)        | 0.036(3)        | 0.005(2)        | 0.007(2)        | -0.008(2)       |
| C9   | 0.043(3)        | 0.026(3)        | 0.054(4)        | 0.016(3)        | 0.007(3)        | 0.004(3)        |
| C10  | 0.044(3)        | 0.032(3)        | 0.056(4)        | 0.014(3)        | -0.011(3)       | -0.026(3)       |
| C11  | 0.023(3)        | 0.029(3)        | 0.056(4)        | 0.011(2)        | 0.005(3)        | -0.010(3)       |
| C12  | 0.014(2)        | 0.026(2)        | 0.025(2)        | -0.0018(19)     | 0.0051(19)      | -0.002(2)       |
| C13  | 0.022(2)        | 0.022(2)        | 0.030(3)        | -0.0032(19)     | -0.003(2)       | -0.006(2)       |
| C14  | 0.029(3)        | 0.034(3)        | 0.032(3)        | 0.002(2)        | 0.005(2)        | 0.007(2)        |
| C15  | 0.022(3)        | 0.035(3)        | 0.030(3)        | 0.004(2)        | 0.004(2)        | -0.000(2)       |
| C16  | 0.020(2)        | 0.015(2)        | 0.017(2)        | 0.0030(18)      | 0.0020(18)      | 0.0001(17)      |
| C17  | 0.023(2)        | 0.019(2)        | 0.017(2)        | 0.0046(19)      | 0.0064(19)      | -0.0042(18)     |
| C18  | 0.021(2)        | 0.018(2)        | 0.021(2)        | 0.0090(19)      | 0.0038(19)      | 0.0014(18)      |
| C19  | 0.034(3)        | 0.016(2)        | 0.017(2)        | 0.003(2)        | 0.006(2)        | -0.0016(18)     |
| C20  | 0.023(2)        | 0.019(2)        | 0.015(2)        | 0.0002(19)      | 0.0023(19)      | -0.0011(18)     |
| C21  | 0.030(3)        | 0.022(2)        | 0.020(2)        | 0.006(2)        | -0.002(2)       | 0.0024(19)      |
| C22  | 0.020(2)        | 0.026(3)        | 0.036(3)        | 0.000(2)        | 0.012(2)        | 0.002(2)        |
| C23  | 0.026(3)        | 0.027(3)        | 0.036(3)        | 0.015(2)        | 0.003(2)        | 0.002(2)        |
| C24  | 0.047(3)        | 0.018(2)        | 0.030(3)        | 0.003(2)        | 0.009(2)        | -0.002(2)       |

Table S11-3. Anisotropic displacement parameters (continued)

| atom | $U_{11}$ | $U_{22}$ | $U_{33}$ | $U_{12}$    | $U_{13}$    | $U_{23}$    |
|------|----------|----------|----------|-------------|-------------|-------------|
| C25  | 0.032(3) | 0.033(3) | 0.029(3) | 0.000(2)    | -0.001(2)   | -0.010(2)   |
| C26  | 0.016(2) | 0.018(2) | 0.013(2) | -0.0023(17) | 0.0002(18)  | -0.0024(17) |
| C27  | 0.017(2) | 0.021(2) | 0.016(2) | -0.0001(18) | 0.0028(18)  | -0.0038(18) |
| C28  | 0.021(2) | 0.016(2) | 0.017(2) | -0.0021(18) | 0.0046(18)  | 0.0013(17)  |
| C29  | 0.036(3) | 0.019(2) | 0.018(2) | -0.005(2)   | 0.002(2)    | -0.0033(19) |
| C30  | 0.045(3) | 0.011(2) | 0.025(3) | -0.002(2)   | 0.007(2)    | -0.0048(19) |
| C31  | 0.033(3) | 0.020(2) | 0.017(2) | 0.000(2)    | 0.003(2)    | -0.0011(19) |
| C32  | 0.025(2) | 0.022(2) | 0.020(2) | 0.005(2)    | -0.003(2)   | -0.0014(19) |
| C33  | 0.055(3) | 0.022(2) | 0.025(3) | 0.004(2)    | -0.005(2)   | 0.0075(19)  |
| C34  | 0.137(5) | 0.049(4) | 0.069(4) | -0.018(4)   | -0.056(4)   | 0.010(3)    |
| C35  | 0.077(3) | 0.084(5) | 0.074(4) | 0.023(3)    | 0.030(3)    | 0.037(4)    |
| C36  | 0.074(4) | 0.042(3) | 0.047(3) | 0.029(3)    | -0.013(3)   | 0.003(2)    |
| C37  | 0.052(3) | 0.016(2) | 0.020(2) | -0.011(2)   | 0.003(2)    | -0.0043(19) |
| C38  | 0.047(3) | 0.035(3) | 0.026(3) | -0.026(3)   | -0.005(3)   | 0.003(2)    |
| C39  | 0.098(5) | 0.023(3) | 0.029(3) | -0.017(3)   | -0.002(3)   | -0.007(2)   |
| C40  | 0.058(4) | 0.029(3) | 0.022(3) | -0.006(3)   | 0.003(3)    | -0.008(2)   |
| C41  | 0.016(2) | 0.024(2) | 0.016(2) | -0.0029(19) | 0.0037(18)  | 0.0042(18)  |
| C42  | 0.028(3) | 0.023(2) | 0.020(2) | -0.002(2)   | 0.012(2)    | -0.0023(19) |
| C43  | 0.036(3) | 0.019(2) | 0.027(3) | -0.001(2)   | 0.009(2)    | 0.004(2)    |
| C44  | 0.028(3) | 0.032(3) | 0.018(2) | 0.005(2)    | 0.009(2)    | 0.010(2)    |
| C45  | 0.025(2) | 0.023(2) | 0.018(2) | 0.000(2)    | 0.009(2)    | 0.0017(19)  |
| C46  | 0.018(2) | 0.033(3) | 0.032(3) | 0.003(2)    | 0.003(2)    | -0.002(2)   |
| C47  | 0.033(3) | 0.031(3) | 0.028(3) | -0.015(2)   | 0.008(2)    | 0.001(2)    |
| C48  | 0.054(4) | 0.026(3) | 0.038(3) | 0.006(3)    | 0.018(3)    | 0.007(2)    |
| C49  | 0.039(3) | 0.043(3) | 0.031(3) | 0.012(3)    | 0.006(3)    | 0.013(2)    |
| C50  | 0.036(3) | 0.037(3) | 0.011(2) | 0.002(2)    | 0.003(2)    | -0.000(2)   |
| C51  | 0.016(2) | 0.021(2) | 0.014(2) | 0.0020(18)  | 0.0006(18)  | -0.0022(18) |
| C52  | 0.018(2) | 0.013(2) | 0.021(2) | -0.0006(17) | -0.0058(19) | 0.0024(17)  |
| C53  | 0.015(2) | 0.014(2) | 0.016(2) | -0.0019(17) | 0.0005(18)  | 0.0013(17)  |
| C54  | 0.029(3) | 0.014(2) | 0.017(2) | 0.0015(19)  | -0.001(2)   | 0.0029(17)  |
| C55  | 0.033(3) | 0.025(3) | 0.014(2) | -0.003(2)   | 0.002(2)    | 0.0034(19)  |
| C56  | 0.021(2) | 0.020(2) | 0.022(2) | -0.0007(19) | -0.004(2)   | 0.0017(19)  |
| C57  | 0.016(2) | 0.020(2) | 0.018(2) | 0.0013(18)  | -0.0007(18) | -0.0015(18) |
| C58  | 0.022(3) | 0.054(3) | 0.029(3) | 0.007(2)    | -0.0103(19) | 0.0081(19)  |
| C59  | 0.047(4) | 0.109(5) | 0.053(3) | 0.030(4)    | 0.002(3)    | -0.003(3)   |
| C60  | 0.058(4) | 0.079(3) | 0.077(4) | 0.006(3)    | -0.031(3)   | -0.018(3)   |
| C61  | 0.062(4) | 0.094(4) | 0.085(4) | 0.020(4)    | 0.002(3)    | 0.053(4)    |

Table S11-3. Anisotropic displacement parameters (continued)

| atom | U <sub>11</sub> | U <sub>22</sub> | U <sub>33</sub> | U <sub>12</sub> | U <sub>13</sub> | U <sub>23</sub> |
|------|-----------------|-----------------|-----------------|-----------------|-----------------|-----------------|
| C62  | 0.030(3)        | 0.028(3)        | 0.015(2)        | 0.005(2)        | 0.006(2)        | -0.0010(19)     |
| C63  | 0.040(3)        | 0.024(3)        | 0.023(3)        | 0.008(2)        | 0.004(2)        | -0.005(2)       |
| C64  | 0.051(3)        | 0.039(3)        | 0.017(2)        | 0.009(3)        | 0.009(2)        | 0.002(2)        |
| C65  | 0.043(3)        | 0.025(3)        | 0.028(3)        | 0.004(2)        | 0.018(2)        | 0.001(2)        |
| C66  | 0.035(3)        | 0.011(2)        | 0.027(3)        | -0.008(2)       | -0.003(2)       | 0.0006(19)      |
| C67  | 0.031(3)        | 0.030(3)        | 0.030(3)        | -0.019(2)       | 0.014(2)        | -0.006(2)       |
| C68  | 0.014(2)        | 0.033(3)        | 0.047(3)        | -0.007(2)       | 0.001(2)        | -0.021(2)       |
| C69  | 0.021(2)        | 0.024(2)        | 0.027(3)        | 0.001(2)        | -0.004(2)       | -0.003(2)       |
| C70  | 0.017(2)        | 0.018(2)        | 0.024(2)        | -0.0037(18)     | 0.0042(19)      | -0.0054(19)     |
| C71  | 0.054(4)        | 0.015(2)        | 0.046(3)        | -0.004(2)       | -0.016(3)       | 0.001(2)        |
| C72  | 0.056(4)        | 0.061(4)        | 0.059(4)        | -0.038(3)       | 0.031(3)        | -0.016(3)       |
| C73  | 0.019(3)        | 0.075(5)        | 0.086(5)        | 0.001(3)        | -0.004(3)       | -0.042(4)       |
| C74  | 0.055(4)        | 0.034(3)        | 0.039(3)        | -0.008(3)       | -0.019(3)       | 0.001(3)        |
| C75  | 0.026(3)        | 0.043(3)        | 0.025(3)        | -0.009(2)       | 0.000(2)        | -0.019(2)       |

The general temperature factor expression:  $\exp(-2\pi^2(a^2U_{11}h^2 + b^2U_{22}k^2 + c^2U_{33}l^2 + 2a*b*U_{12}hk + 2a*c*U_{13}hl + 2b*c*U_{23}kl))$

Table S11-4. Bond lengths (Å)

| atom | atom | distance   | atom | atom | distance   |
|------|------|------------|------|------|------------|
| Ti1  | Cl1  | 2.2616(14) | Ti1  | Cl2  | 2.2702(14) |
| Ti1  | O1   | 1.790(3)   | Ti1  | C16  | 2.348(4)   |
| Ti1  | C17  | 2.381(5)   | Ti1  | C18  | 2.415(5)   |
| Ti1  | C19  | 2.407(4)   | Ti1  | C20  | 2.353(4)   |
| Ti2  | Cl3  | 2.2602(15) | Ti2  | Cl4  | 2.2653(15) |
| Ti2  | O2   | 1.792(3)   | Ti2  | C41  | 2.343(4)   |
| Ti2  | C42  | 2.368(5)   | Ti2  | C43  | 2.398(5)   |
| Ti2  | C44  | 2.391(5)   | Ti2  | C45  | 2.335(5)   |
| Ti3  | Cl5  | 2.2700(15) | Ti3  | Cl6  | 2.2546(15) |
| Ti3  | O3   | 1.789(3)   | Ti3  | C66  | 2.339(4)   |
| Ti3  | C67  | 2.353(5)   | Ti3  | C68  | 2.391(5)   |
| Ti3  | C69  | 2.395(5)   | Ti3  | C70  | 2.373(4)   |
| O1   | C3   | 1.377(5)   | O2   | C28  | 1.371(5)   |
| O3   | C53  | 1.373(5)   | N1   | C1   | 1.468(5)   |
| N1   | C26  | 1.456(5)   | N1   | C51  | 1.471(6)   |
| C1   | C2   | 1.498(6)   | C2   | C3   | 1.415(6)   |
| C2   | C7   | 1.373(6)   | C3   | C4   | 1.417(6)   |
| C4   | C5   | 1.394(6)   | C4   | C12  | 1.530(6)   |
| C5   | C6   | 1.382(6)   | C6   | C7   | 1.395(6)   |
| C6   | C8   | 1.541(6)   | C8   | C9   | 1.534(8)   |
| C8   | C10  | 1.542(7)   | C8   | C11  | 1.506(7)   |
| C12  | C13  | 1.545(7)   | C12  | C14  | 1.540(7)   |
| C12  | C15  | 1.536(6)   | C16  | C17  | 1.425(6)   |
| C16  | C20  | 1.428(6)   | C16  | C21  | 1.497(6)   |
| C17  | C18  | 1.426(6)   | C17  | C22  | 1.506(6)   |
| C18  | C19  | 1.401(6)   | C18  | C23  | 1.477(6)   |
| C19  | C20  | 1.422(6)   | C19  | C24  | 1.502(6)   |
| C20  | C25  | 1.489(6)   | C26  | C27  | 1.493(6)   |
| C27  | C28  | 1.412(6)   | C27  | C32  | 1.382(6)   |
| C28  | C29  | 1.417(6)   | C29  | C30  | 1.398(6)   |
| C29  | C37  | 1.534(6)   | C30  | C31  | 1.390(6)   |
| C31  | C32  | 1.383(6)   | C31  | C33  | 1.537(7)   |
| C33  | C34  | 1.456(9)   | C33  | C35  | 1.554(10)  |
| C33  | C36  | 1.479(8)   | C37  | C38  | 1.547(8)   |
| C37  | C39  | 1.528(7)   | C37  | C40  | 1.530(8)   |
| C41  | C42  | 1.411(6)   | C41  | C45  | 1.415(6)   |
| C41  | C46  | 1.501(6)   | C42  | C43  | 1.409(7)   |

Table S11-4. Bond lengths (Å) (continued)

| atom | atom | distance | atom | atom | distance  |
|------|------|----------|------|------|-----------|
| C42  | C47  | 1.510(7) | C43  | C44  | 1.416(7)  |
| C43  | C48  | 1.505(7) | C44  | C45  | 1.425(7)  |
| C44  | C49  | 1.486(7) | C45  | C50  | 1.503(7)  |
| C51  | C52  | 1.510(6) | C52  | C53  | 1.402(6)  |
| C52  | C57  | 1.389(6) | C53  | C54  | 1.414(6)  |
| C54  | C55  | 1.398(6) | C54  | C62  | 1.539(7)  |
| C55  | C56  | 1.397(7) | C56  | C57  | 1.395(6)  |
| C56  | C58  | 1.531(7) | C58  | C59  | 1.471(9)  |
| C58  | C60  | 1.546(9) | C58  | C61  | 1.526(10) |
| C62  | C63  | 1.524(7) | C62  | C64  | 1.523(6)  |
| C62  | C65  | 1.545(7) | C66  | C67  | 1.422(7)  |
| C66  | C70  | 1.434(7) | C66  | C71  | 1.493(7)  |
| C67  | C68  | 1.424(7) | C67  | C72  | 1.475(8)  |
| C68  | C69  | 1.386(7) | C68  | C73  | 1.511(7)  |
| C69  | C70  | 1.423(6) | C69  | C74  | 1.492(7)  |
| C70  | C75  | 1.487(7) |      |      |           |



Table S11-5. Bond lengths involving hydrogens (Å)

| atom | atom | distance | atom | atom | distance |
|------|------|----------|------|------|----------|
| C1   | H1A  | 0.990    | C1   | H1B  | 0.990    |
| C5   | H5   | 0.950    | C7   | H7   | 0.950    |
| C9   | H9A  | 0.980    | C9   | H9B  | 0.980    |
| C9   | H9C  | 0.980    | C10  | H10A | 0.980    |
| C10  | H10B | 0.980    | C10  | H10C | 0.980    |
| C11  | H11A | 0.980    | C11  | H11B | 0.980    |
| C11  | H11C | 0.980    | C13  | H13A | 0.980    |
| C13  | H13B | 0.980    | C13  | H13C | 0.980    |
| C14  | H14A | 0.980    | C14  | H14B | 0.980    |
| C14  | H14C | 0.980    | C15  | H15A | 0.980    |
| C15  | H15B | 0.980    | C15  | H15C | 0.980    |
| C21  | H21A | 0.980    | C21  | H21B | 0.980    |
| C21  | H21C | 0.980    | C22  | H22A | 0.980    |
| C22  | H22B | 0.980    | C22  | H22C | 0.980    |
| C23  | H23A | 0.980    | C23  | H23B | 0.980    |
| C23  | H23C | 0.980    | C24  | H24A | 0.980    |
| C24  | H24B | 0.980    | C24  | H24C | 0.980    |
| C25  | H25A | 0.980    | C25  | H25B | 0.980    |
| C25  | H25C | 0.980    | C26  | H26A | 0.990    |
| C26  | H26B | 0.990    | C30  | H30  | 0.950    |
| C32  | H32  | 0.950    | C34  | H34A | 0.980    |
| C34  | H34B | 0.980    | C34  | H34C | 0.980    |
| C35  | H35A | 0.980    | C35  | H35B | 0.980    |
| C35  | H35C | 0.980    | C36  | H36A | 0.980    |
| C36  | H36B | 0.980    | C36  | H36C | 0.980    |
| C38  | H38A | 0.980    | C38  | H38B | 0.980    |
| C38  | H38C | 0.980    | C39  | H39A | 0.980    |
| C39  | H39B | 0.980    | C39  | H39C | 0.980    |
| C40  | H40A | 0.980    | C40  | H40B | 0.980    |
| C40  | H40C | 0.980    | C46  | H46A | 0.980    |
| C46  | H46B | 0.980    | C46  | H46C | 0.980    |
| C47  | H47A | 0.980    | C47  | H47B | 0.980    |
| C47  | H47C | 0.980    | C48  | H48A | 0.980    |
| C48  | H48B | 0.980    | C48  | H48C | 0.980    |
| C49  | H49A | 0.980    | C49  | H49B | 0.980    |
| C49  | H49C | 0.980    | C50  | H50A | 0.980    |
| C50  | H50B | 0.980    | C50  | H50C | 0.980    |

Table S11-5. Bond lengths involving hydrogens (Å) (continued)

| atom | atom | distance | atom | atom | distance |
|------|------|----------|------|------|----------|
| C51  | H51A | 0.990    | C51  | H51B | 0.990    |
| C55  | H55  | 0.950    | C57  | H57  | 0.950    |
| C59  | H59A | 0.980    | C59  | H59B | 0.980    |
| C59  | H59C | 0.980    | C60  | H60A | 0.980    |
| C60  | H60B | 0.980    | C60  | H60C | 0.980    |
| C61  | H61A | 0.980    | C61  | H61B | 0.980    |
| C61  | H61C | 0.980    | C63  | H63A | 0.980    |
| C63  | H63B | 0.980    | C63  | H63C | 0.980    |
| C64  | H64A | 0.980    | C64  | H64B | 0.980    |
| C64  | H64C | 0.980    | C65  | H65A | 0.980    |
| C65  | H65B | 0.980    | C65  | H65C | 0.980    |
| C71  | H71A | 0.980    | C71  | H71B | 0.980    |
| C71  | H71C | 0.980    | C72  | H72A | 0.980    |
| C72  | H72B | 0.980    | C72  | H72C | 0.980    |
| C73  | H73A | 0.980    | C73  | H73B | 0.980    |
| C73  | H73C | 0.980    | C74  | H74A | 0.980    |
| C74  | H74B | 0.980    | C74  | H74C | 0.980    |
| C75  | H75A | 0.980    | C75  | H75B | 0.980    |
| C75  | H75C | 0.980    |      |      |          |

Table S11-6. Bond angles (°)

| atom | atom | atom | angle      | atom | atom | atom | angle      |
|------|------|------|------------|------|------|------|------------|
| Cl1  | Ti1  | Cl2  | 101.11(5)  | Cl1  | Ti1  | O1   | 103.02(10) |
| Cl1  | Ti1  | C16  | 124.93(11) | Cl1  | Ti1  | C17  | 91.49(11)  |
| Cl1  | Ti1  | C18  | 85.43(11)  | Cl1  | Ti1  | C19  | 112.69(12) |
| Cl1  | Ti1  | C20  | 142.96(12) | Cl2  | Ti1  | O1   | 103.27(10) |
| Cl2  | Ti1  | C16  | 127.55(11) | Cl2  | Ti1  | C17  | 140.26(11) |
| Cl2  | Ti1  | C18  | 108.53(11) | Cl2  | Ti1  | C19  | 83.55(11)  |
| Cl2  | Ti1  | C20  | 92.76(11)  | O1   | Ti1  | C16  | 90.52(14)  |
| O1   | Ti1  | C17  | 110.38(14) | O1   | Ti1  | C18  | 144.82(14) |
| O1   | Ti1  | C19  | 141.68(14) | O1   | Ti1  | C20  | 106.95(14) |
| C16  | Ti1  | C17  | 35.07(15)  | C16  | Ti1  | C18  | 58.15(15)  |
| C16  | Ti1  | C19  | 57.98(14)  | C16  | Ti1  | C20  | 35.37(15)  |
| C17  | Ti1  | C18  | 34.59(15)  | C17  | Ti1  | C19  | 56.93(15)  |
| C17  | Ti1  | C20  | 57.93(15)  | C18  | Ti1  | C19  | 33.78(15)  |
| C18  | Ti1  | C20  | 57.55(15)  | C19  | Ti1  | C20  | 34.74(15)  |
| Cl3  | Ti2  | Cl4  | 101.85(6)  | Cl3  | Ti2  | O2   | 103.64(11) |
| Cl3  | Ti2  | C41  | 127.33(12) | Cl3  | Ti2  | C42  | 93.16(12)  |
| Cl3  | Ti2  | C43  | 83.66(13)  | Cl3  | Ti2  | C44  | 108.96(13) |
| Cl3  | Ti2  | C45  | 141.08(12) | Cl4  | Ti2  | O2   | 101.75(11) |
| Cl4  | Ti2  | C41  | 123.88(12) | Cl4  | Ti2  | C42  | 141.03(12) |
| Cl4  | Ti2  | C43  | 111.52(12) | Cl4  | Ti2  | C44  | 83.47(12)  |
| Cl4  | Ti2  | C45  | 89.91(12)  | O2   | Ti2  | C41  | 92.09(15)  |
| O2   | Ti2  | C42  | 109.37(15) | O2   | Ti2  | C43  | 143.76(16) |
| O2   | Ti2  | C44  | 145.17(16) | O2   | Ti2  | C45  | 110.11(15) |
| C41  | Ti2  | C42  | 34.84(16)  | C41  | Ti2  | C43  | 57.72(16)  |
| C41  | Ti2  | C44  | 58.31(16)  | C41  | Ti2  | C45  | 35.22(15)  |
| C42  | Ti2  | C43  | 34.39(16)  | C42  | Ti2  | C44  | 57.60(16)  |
| C42  | Ti2  | C45  | 57.93(16)  | C43  | Ti2  | C44  | 34.39(16)  |
| C43  | Ti2  | C45  | 57.64(16)  | C44  | Ti2  | C45  | 35.07(16)  |
| Cl5  | Ti3  | Cl6  | 101.69(5)  | Cl5  | Ti3  | O3   | 102.08(11) |
| Cl5  | Ti3  | C66  | 122.97(13) | Cl5  | Ti3  | C67  | 89.26(13)  |
| Cl5  | Ti3  | C68  | 84.35(13)  | Cl5  | Ti3  | C69  | 111.91(12) |
| Cl5  | Ti3  | C70  | 141.47(11) | Cl6  | Ti3  | O3   | 103.58(10) |
| Cl6  | Ti3  | C66  | 128.52(13) | Cl6  | Ti3  | C67  | 140.89(13) |
| Cl6  | Ti3  | C68  | 108.26(14) | Cl6  | Ti3  | C69  | 83.66(12)  |
| Cl6  | Ti3  | C70  | 93.60(12)  | O3   | Ti3  | C66  | 91.65(15)  |
| O3   | Ti3  | C67  | 110.68(15) | O3   | Ti3  | C68  | 145.49(16) |
| O3   | Ti3  | C69  | 143.10(15) | O3   | Ti3  | C70  | 108.39(14) |

Table S11-6. Bond angles ( $^{\circ}$ ) (continued)

| atom | atom | atom | angle     | atom | atom | atom | angle     |
|------|------|------|-----------|------|------|------|-----------|
| C66  | Ti3  | C67  | 35.26(18) | C66  | Ti3  | C68  | 57.98(17) |
| C66  | Ti3  | C69  | 58.15(16) | C66  | Ti3  | C70  | 35.43(16) |
| C67  | Ti3  | C68  | 34.92(17) | C67  | Ti3  | C69  | 57.61(17) |
| C67  | Ti3  | C70  | 58.37(17) | C68  | Ti3  | C69  | 33.66(18) |
| C68  | Ti3  | C70  | 57.21(16) | C69  | Ti3  | C70  | 34.71(15) |
| Ti1  | O1   | C3   | 169.3(3)  | Ti2  | O2   | C28  | 169.8(3)  |
| Ti3  | O3   | C53  | 167.9(3)  | C1   | N1   | C26  | 110.5(3)  |
| C1   | N1   | C51  | 110.7(3)  | C26  | N1   | C51  | 110.5(3)  |
| N1   | C1   | C2   | 111.9(3)  | C1   | C2   | C3   | 120.1(4)  |
| C1   | C2   | C7   | 121.1(4)  | C3   | C2   | C7   | 118.8(4)  |
| O1   | C3   | C2   | 117.3(4)  | O1   | C3   | C4   | 121.6(4)  |
| C2   | C3   | C4   | 121.1(4)  | C3   | C4   | C5   | 116.1(4)  |
| C3   | C4   | C12  | 123.0(4)  | C5   | C4   | C12  | 120.8(4)  |
| C4   | C5   | C6   | 124.3(4)  | C5   | C6   | C7   | 117.3(4)  |
| C5   | C6   | C8   | 123.7(4)  | C7   | C6   | C8   | 119.0(4)  |
| C2   | C7   | C6   | 122.3(4)  | C6   | C8   | C9   | 110.4(4)  |
| C6   | C8   | C10  | 108.6(4)  | C6   | C8   | C11  | 112.1(4)  |
| C9   | C8   | C10  | 109.0(4)  | C9   | C8   | C11  | 107.8(4)  |
| C10  | C8   | C11  | 108.8(4)  | C4   | C12  | C13  | 109.9(4)  |
| C4   | C12  | C14  | 109.7(4)  | C4   | C12  | C15  | 112.1(4)  |
| C13  | C12  | C14  | 110.2(4)  | C13  | C12  | C15  | 106.5(4)  |
| C14  | C12  | C15  | 108.3(4)  | Ti1  | C16  | C17  | 73.7(2)   |
| Ti1  | C16  | C20  | 72.5(2)   | Ti1  | C16  | C21  | 122.4(3)  |
| C17  | C16  | C20  | 107.0(4)  | C17  | C16  | C21  | 127.0(4)  |
| C20  | C16  | C21  | 125.9(4)  | Ti1  | C17  | C16  | 71.2(3)   |
| Ti1  | C17  | C18  | 74.0(3)   | Ti1  | C17  | C22  | 125.5(3)  |
| C16  | C17  | C18  | 108.6(4)  | C16  | C17  | C22  | 127.5(4)  |
| C18  | C17  | C22  | 123.7(4)  | Ti1  | C18  | C17  | 71.4(3)   |
| Ti1  | C18  | C19  | 72.8(3)   | Ti1  | C18  | C23  | 125.1(3)  |
| C17  | C18  | C19  | 107.7(4)  | C17  | C18  | C23  | 124.8(4)  |
| C19  | C18  | C23  | 127.4(4)  | Ti1  | C19  | C18  | 73.4(3)   |
| Ti1  | C19  | C20  | 70.6(2)   | Ti1  | C19  | C24  | 125.3(3)  |
| C18  | C19  | C20  | 108.8(4)  | C18  | C19  | C24  | 125.9(4)  |
| C20  | C19  | C24  | 125.2(4)  | Ti1  | C20  | C16  | 72.1(2)   |
| Ti1  | C20  | C19  | 74.7(2)   | Ti1  | C20  | C25  | 125.2(3)  |
| C16  | C20  | C19  | 108.0(4)  | C16  | C20  | C25  | 125.3(4)  |
| C19  | C20  | C25  | 126.2(4)  | N1   | C26  | C27  | 112.8(3)  |

Table S11-6. Bond angles ( $^{\circ}$ ) (continued)

| atom | atom | atom | angle    | atom | atom | atom | angle    |
|------|------|------|----------|------|------|------|----------|
| C26  | C27  | C28  | 120.1(4) | C26  | C27  | C32  | 121.3(4) |
| C28  | C27  | C32  | 118.6(4) | O2   | C28  | C27  | 116.9(4) |
| O2   | C28  | C29  | 122.2(4) | C27  | C28  | C29  | 120.9(4) |
| C28  | C29  | C30  | 116.4(4) | C28  | C29  | C37  | 122.6(4) |
| C30  | C29  | C37  | 120.9(4) | C29  | C30  | C31  | 124.2(4) |
| C30  | C31  | C32  | 116.9(4) | C30  | C31  | C33  | 120.3(4) |
| C32  | C31  | C33  | 122.8(4) | C27  | C32  | C31  | 123.0(4) |
| C31  | C33  | C34  | 113.1(5) | C31  | C33  | C35  | 108.8(5) |
| C31  | C33  | C36  | 112.6(4) | C34  | C33  | C35  | 106.1(6) |
| C34  | C33  | C36  | 112.8(5) | C35  | C33  | C36  | 102.6(5) |
| C29  | C37  | C38  | 108.5(4) | C29  | C37  | C39  | 112.6(4) |
| C29  | C37  | C40  | 110.8(4) | C38  | C37  | C39  | 106.1(5) |
| C38  | C37  | C40  | 110.5(4) | C39  | C37  | C40  | 108.2(4) |
| Ti2  | C41  | C42  | 73.5(3)  | Ti2  | C41  | C45  | 72.1(3)  |
| Ti2  | C41  | C46  | 122.3(3) | C42  | C41  | C45  | 107.4(4) |
| C42  | C41  | C46  | 126.2(4) | C45  | C41  | C46  | 126.3(4) |
| Ti2  | C42  | C41  | 71.6(3)  | Ti2  | C42  | C43  | 74.0(3)  |
| Ti2  | C42  | C47  | 126.7(3) | C41  | C42  | C43  | 108.5(4) |
| C41  | C42  | C47  | 126.9(4) | C43  | C42  | C47  | 124.1(4) |
| Ti2  | C43  | C42  | 71.6(3)  | Ti2  | C43  | C44  | 72.5(3)  |
| Ti2  | C43  | C48  | 125.3(4) | C42  | C43  | C44  | 108.5(4) |
| C42  | C43  | C48  | 126.0(4) | C44  | C43  | C48  | 125.3(4) |
| Ti2  | C44  | C43  | 73.1(3)  | Ti2  | C44  | C45  | 70.3(3)  |
| Ti2  | C44  | C49  | 123.1(3) | C43  | C44  | C45  | 106.9(4) |
| C43  | C44  | C49  | 125.2(4) | C45  | C44  | C49  | 127.8(4) |
| Ti2  | C45  | C41  | 72.7(3)  | Ti2  | C45  | C44  | 74.6(3)  |
| Ti2  | C45  | C50  | 123.7(3) | C41  | C45  | C44  | 108.6(4) |
| C41  | C45  | C50  | 126.6(4) | C44  | C45  | C50  | 124.5(4) |
| N1   | C51  | C52  | 112.7(3) | C51  | C52  | C53  | 119.9(4) |
| C51  | C52  | C57  | 120.0(4) | C53  | C52  | C57  | 120.1(4) |
| O3   | C53  | C52  | 117.8(4) | O3   | C53  | C54  | 121.3(4) |
| C52  | C53  | C54  | 120.9(4) | C53  | C54  | C55  | 116.5(4) |
| C53  | C54  | C62  | 123.4(4) | C55  | C54  | C62  | 120.0(4) |
| C54  | C55  | C56  | 123.8(4) | C55  | C56  | C57  | 117.8(4) |
| C55  | C56  | C58  | 120.2(4) | C57  | C56  | C58  | 122.0(4) |
| C52  | C57  | C56  | 120.8(4) | C56  | C58  | C59  | 113.5(5) |
| C56  | C58  | C60  | 106.4(5) | C56  | C58  | C61  | 110.6(5) |

Table S11-6. Bond angles ( $^{\circ}$ ) (continued)

| atom | atom | atom | angle    | atom | atom | atom | angle    |
|------|------|------|----------|------|------|------|----------|
| C59  | C58  | C60  | 109.9(5) | C59  | C58  | C61  | 108.8(6) |
| C60  | C58  | C61  | 107.5(5) | C54  | C62  | C63  | 108.7(4) |
| C54  | C62  | C64  | 112.0(4) | C54  | C62  | C65  | 110.4(4) |
| C63  | C62  | C64  | 107.8(4) | C63  | C62  | C65  | 110.9(4) |
| C64  | C62  | C65  | 107.0(4) | Ti3  | C66  | C67  | 72.9(3)  |
| Ti3  | C66  | C70  | 73.6(2)  | Ti3  | C66  | C71  | 121.3(3) |
| C67  | C66  | C70  | 107.6(4) | C67  | C66  | C71  | 125.7(5) |
| C70  | C66  | C71  | 126.7(5) | Ti3  | C67  | C66  | 71.8(3)  |
| Ti3  | C67  | C68  | 74.0(3)  | Ti3  | C67  | C72  | 124.8(4) |
| C66  | C67  | C68  | 107.4(4) | C66  | C67  | C72  | 126.7(5) |
| C68  | C67  | C72  | 125.6(5) | Ti3  | C68  | C67  | 71.1(3)  |
| Ti3  | C68  | C69  | 73.3(3)  | Ti3  | C68  | C73  | 122.8(4) |
| C67  | C68  | C69  | 109.0(4) | C67  | C68  | C73  | 127.5(5) |
| C69  | C68  | C73  | 123.5(5) | Ti3  | C69  | C68  | 73.0(3)  |
| Ti3  | C69  | C70  | 71.8(3)  | Ti3  | C69  | C74  | 125.7(3) |
| C68  | C69  | C70  | 108.6(4) | C68  | C69  | C74  | 127.4(5) |
| C70  | C69  | C74  | 123.8(5) | Ti3  | C70  | C66  | 71.0(2)  |
| Ti3  | C70  | C69  | 73.5(3)  | Ti3  | C70  | C75  | 126.8(3) |
| C66  | C70  | C69  | 107.3(4) | C66  | C70  | C75  | 127.7(4) |
| C69  | C70  | C75  | 124.6(4) |      |      |      |          |

Table S11-7. Bond angles involving hydrogens (°)

| atom | atom | atom | angle | atom | atom | atom | angle |
|------|------|------|-------|------|------|------|-------|
| N1   | C1   | H1A  | 109.2 | N1   | C1   | H1B  | 109.2 |
| C2   | C1   | H1A  | 109.2 | C2   | C1   | H1B  | 109.2 |
| H1A  | C1   | H1B  | 107.9 | C4   | C5   | H5   | 117.9 |
| C6   | C5   | H5   | 117.9 | C2   | C7   | H7   | 118.9 |
| C6   | C7   | H7   | 118.9 | C8   | C9   | H9A  | 109.5 |
| C8   | C9   | H9B  | 109.5 | C8   | C9   | H9C  | 109.5 |
| H9A  | C9   | H9B  | 109.5 | H9A  | C9   | H9C  | 109.5 |
| H9B  | C9   | H9C  | 109.5 | C8   | C10  | H10A | 109.5 |
| C8   | C10  | H10B | 109.5 | C8   | C10  | H10C | 109.5 |
| H10A | C10  | H10B | 109.5 | H10A | C10  | H10C | 109.5 |
| H10B | C10  | H10C | 109.5 | C8   | C11  | H11A | 109.5 |
| C8   | C11  | H11B | 109.5 | C8   | C11  | H11C | 109.5 |
| H11A | C11  | H11B | 109.5 | H11A | C11  | H11C | 109.5 |
| H11B | C11  | H11C | 109.5 | C12  | C13  | H13A | 109.5 |
| C12  | C13  | H13B | 109.5 | C12  | C13  | H13C | 109.5 |
| H13A | C13  | H13B | 109.5 | H13A | C13  | H13C | 109.5 |
| H13B | C13  | H13C | 109.5 | C12  | C14  | H14A | 109.5 |
| C12  | C14  | H14B | 109.5 | C12  | C14  | H14C | 109.5 |
| H14A | C14  | H14B | 109.5 | H14A | C14  | H14C | 109.5 |
| H14B | C14  | H14C | 109.5 | C12  | C15  | H15A | 109.5 |
| C12  | C15  | H15B | 109.5 | C12  | C15  | H15C | 109.5 |
| H15A | C15  | H15B | 109.5 | H15A | C15  | H15C | 109.5 |
| H15B | C15  | H15C | 109.5 | C16  | C21  | H21A | 109.5 |
| C16  | C21  | H21B | 109.5 | C16  | C21  | H21C | 109.5 |
| H21A | C21  | H21B | 109.5 | H21A | C21  | H21C | 109.5 |
| H21B | C21  | H21C | 109.5 | C17  | C22  | H22A | 109.5 |
| C17  | C22  | H22B | 109.5 | C17  | C22  | H22C | 109.5 |
| H22A | C22  | H22B | 109.5 | H22A | C22  | H22C | 109.5 |
| H22B | C22  | H22C | 109.5 | C18  | C23  | H23A | 109.5 |
| C18  | C23  | H23B | 109.5 | C18  | C23  | H23C | 109.5 |
| H23A | C23  | H23B | 109.5 | H23A | C23  | H23C | 109.5 |
| H23B | C23  | H23C | 109.5 | C19  | C24  | H24A | 109.5 |
| C19  | C24  | H24B | 109.5 | C19  | C24  | H24C | 109.5 |
| H24A | C24  | H24B | 109.5 | H24A | C24  | H24C | 109.5 |
| H24B | C24  | H24C | 109.5 | C20  | C25  | H25A | 109.5 |
| C20  | C25  | H25B | 109.5 | C20  | C25  | H25C | 109.5 |
| H25A | C25  | H25B | 109.5 | H25A | C25  | H25C | 109.5 |

Table S11-7. Bond angles involving hydrogens ( $^{\circ}$ ) (continued)

| atom | atom | atom | angle | atom | atom | atom | angle |
|------|------|------|-------|------|------|------|-------|
| H25B | C25  | H25C | 109.5 | N1   | C26  | H26A | 109.0 |
| N1   | C26  | H26B | 109.0 | C27  | C26  | H26A | 109.0 |
| C27  | C26  | H26B | 109.0 | H26A | C26  | H26B | 107.8 |
| C29  | C30  | H30  | 117.9 | C31  | C30  | H30  | 117.9 |
| C27  | C32  | H32  | 118.5 | C31  | C32  | H32  | 118.5 |
| C33  | C34  | H34A | 109.5 | C33  | C34  | H34B | 109.5 |
| C33  | C34  | H34C | 109.5 | H34A | C34  | H34B | 109.5 |
| H34A | C34  | H34C | 109.5 | H34B | C34  | H34C | 109.5 |
| C33  | C35  | H35A | 109.5 | C33  | C35  | H35B | 109.5 |
| C33  | C35  | H35C | 109.5 | H35A | C35  | H35B | 109.5 |
| H35A | C35  | H35C | 109.5 | H35B | C35  | H35C | 109.5 |
| C33  | C36  | H36A | 109.5 | C33  | C36  | H36B | 109.5 |
| C33  | C36  | H36C | 109.5 | H36A | C36  | H36B | 109.5 |
| H36A | C36  | H36C | 109.5 | H36B | C36  | H36C | 109.5 |
| C37  | C38  | H38A | 109.5 | C37  | C38  | H38B | 109.5 |
| C37  | C38  | H38C | 109.5 | H38A | C38  | H38B | 109.5 |
| H38A | C38  | H38C | 109.5 | H38B | C38  | H38C | 109.5 |
| C37  | C39  | H39A | 109.5 | C37  | C39  | H39B | 109.5 |
| C37  | C39  | H39C | 109.5 | H39A | C39  | H39B | 109.5 |
| H39A | C39  | H39C | 109.5 | H39B | C39  | H39C | 109.5 |
| C37  | C40  | H40A | 109.5 | C37  | C40  | H40B | 109.5 |
| C37  | C40  | H40C | 109.5 | H40A | C40  | H40B | 109.5 |
| H40A | C40  | H40C | 109.5 | H40B | C40  | H40C | 109.5 |
| C41  | C46  | H46A | 109.5 | C41  | C46  | H46B | 109.5 |
| C41  | C46  | H46C | 109.5 | H46A | C46  | H46B | 109.5 |
| H46A | C46  | H46C | 109.5 | H46B | C46  | H46C | 109.5 |
| C42  | C47  | H47A | 109.5 | C42  | C47  | H47B | 109.5 |
| C42  | C47  | H47C | 109.5 | H47A | C47  | H47B | 109.5 |
| H47A | C47  | H47C | 109.5 | H47B | C47  | H47C | 109.5 |
| C43  | C48  | H48A | 109.5 | C43  | C48  | H48B | 109.5 |
| C43  | C48  | H48C | 109.5 | H48A | C48  | H48B | 109.5 |
| H48A | C48  | H48C | 109.5 | H48B | C48  | H48C | 109.5 |
| C44  | C49  | H49A | 109.5 | C44  | C49  | H49B | 109.5 |
| C44  | C49  | H49C | 109.5 | H49A | C49  | H49B | 109.5 |
| H49A | C49  | H49C | 109.5 | H49B | C49  | H49C | 109.5 |
| C45  | C50  | H50A | 109.5 | C45  | C50  | H50B | 109.5 |
| C45  | C50  | H50C | 109.5 | H50A | C50  | H50B | 109.5 |



Table S11-7. Bond angles involving hydrogens ( $^{\circ}$ ) (continued)

| atom | atom | atom | angle | atom | atom | atom | angle |
|------|------|------|-------|------|------|------|-------|
| H50A | C50  | H50C | 109.5 | H50B | C50  | H50C | 109.5 |
| N1   | C51  | H51A | 109.1 | N1   | C51  | H51B | 109.1 |
| C52  | C51  | H51A | 109.1 | C52  | C51  | H51B | 109.0 |
| H51A | C51  | H51B | 107.8 | C54  | C55  | H55  | 118.1 |
| C56  | C55  | H55  | 118.1 | C52  | C57  | H57  | 119.6 |
| C56  | C57  | H57  | 119.6 | C58  | C59  | H59A | 109.5 |
| C58  | C59  | H59B | 109.5 | C58  | C59  | H59C | 109.5 |
| H59A | C59  | H59B | 109.5 | H59A | C59  | H59C | 109.5 |
| H59B | C59  | H59C | 109.5 | C58  | C60  | H60A | 109.5 |
| C58  | C60  | H60B | 109.5 | C58  | C60  | H60C | 109.5 |
| H60A | C60  | H60B | 109.5 | H60A | C60  | H60C | 109.5 |
| H60B | C60  | H60C | 109.5 | C58  | C61  | H61A | 109.5 |
| C58  | C61  | H61B | 109.5 | C58  | C61  | H61C | 109.5 |
| H61A | C61  | H61B | 109.5 | H61A | C61  | H61C | 109.5 |
| H61B | C61  | H61C | 109.5 | C62  | C63  | H63A | 109.5 |
| C62  | C63  | H63B | 109.5 | C62  | C63  | H63C | 109.5 |
| H63A | C63  | H63B | 109.5 | H63A | C63  | H63C | 109.5 |
| H63B | C63  | H63C | 109.5 | C62  | C64  | H64A | 109.5 |
| C62  | C64  | H64B | 109.5 | C62  | C64  | H64C | 109.5 |
| H64A | C64  | H64B | 109.5 | H64A | C64  | H64C | 109.5 |
| H64B | C64  | H64C | 109.5 | C62  | C65  | H65A | 109.5 |
| C62  | C65  | H65B | 109.5 | C62  | C65  | H65C | 109.5 |
| H65A | C65  | H65B | 109.5 | H65A | C65  | H65C | 109.5 |
| H65B | C65  | H65C | 109.5 | C66  | C71  | H71A | 109.5 |
| C66  | C71  | H71B | 109.5 | C66  | C71  | H71C | 109.5 |
| H71A | C71  | H71B | 109.5 | H71A | C71  | H71C | 109.5 |
| H71B | C71  | H71C | 109.5 | C67  | C72  | H72A | 109.5 |
| C67  | C72  | H72B | 109.5 | C67  | C72  | H72C | 109.5 |
| H72A | C72  | H72B | 109.5 | H72A | C72  | H72C | 109.5 |
| H72B | C72  | H72C | 109.5 | C68  | C73  | H73A | 109.5 |
| C68  | C73  | H73B | 109.5 | C68  | C73  | H73C | 109.5 |
| H73A | C73  | H73B | 109.5 | H73A | C73  | H73C | 109.5 |
| H73B | C73  | H73C | 109.5 | C69  | C74  | H74A | 109.5 |
| C69  | C74  | H74B | 109.5 | C69  | C74  | H74C | 109.5 |
| H74A | C74  | H74B | 109.5 | H74A | C74  | H74C | 109.5 |
| H74B | C74  | H74C | 109.5 | C70  | C75  | H75A | 109.5 |
| C70  | C75  | H75B | 109.5 | C70  | C75  | H75C | 109.5 |

Table S11-7. Bond angles involving hydrogens ( $^{\circ}$ ) (continued)

| atom | atom | atom | angle | atom | atom | atom | angle |
|------|------|------|-------|------|------|------|-------|
| H75A | C75  | H75B | 109.5 | H75A | C75  | H75C | 109.5 |
| H75B | C75  | H75C | 109.5 |      |      |      |       |

Table S11-8. Torsion Angles(<sup>o</sup>)

(Those having bond angles &gt; 160 or &lt; 20 degrees are excluded.)

| atom1 | atom2 | atom3 | atom4 | angle       | atom1 | atom2 | atom3 | atom4 | angle       |
|-------|-------|-------|-------|-------------|-------|-------|-------|-------|-------------|
| Cl1   | Ti1   | C16   | C17   | 20.0(2)     | Cl1   | Ti1   | C16   | C20   | 134.27(12)  |
| Cl1   | Ti1   | C16   | C21   | -103.8(3)   | Cl1   | Ti1   | C17   | C16   | -163.67(15) |
| Cl1   | Ti1   | C17   | C18   | 79.73(15)   | Cl1   | Ti1   | C17   | C22   | -40.5(3)    |
| Cl1   | Ti1   | C18   | C17   | -99.33(15)  | Cl1   | Ti1   | C18   | C19   | 144.64(17)  |
| Cl1   | Ti1   | C18   | C23   | 20.6(3)     | Cl1   | Ti1   | C19   | C18   | -38.70(19)  |
| Cl1   | Ti1   | C19   | C20   | -156.26(13) | Cl1   | Ti1   | C19   | C24   | 83.8(3)     |
| Cl1   | Ti1   | C20   | C16   | -77.0(2)    | Cl1   | Ti1   | C20   | C19   | 38.1(3)     |
| Cl1   | Ti1   | C20   | C25   | 161.91(16)  | Cl2   | Ti1   | C16   | C17   | -126.37(13) |
| Cl2   | Ti1   | C16   | C20   | -12.1(2)    | Cl2   | Ti1   | C16   | C21   | 109.8(2)    |
| Cl2   | Ti1   | C17   | C16   | 86.9(2)     | Cl2   | Ti1   | C17   | C18   | -29.7(3)    |
| Cl2   | Ti1   | C17   | C22   | -149.97(19) | Cl2   | Ti1   | C18   | C17   | 160.48(12)  |
| Cl2   | Ti1   | C18   | C19   | 44.44(18)   | Cl2   | Ti1   | C18   | C23   | -79.6(3)    |
| Cl2   | Ti1   | C19   | C18   | -138.08(16) | Cl2   | Ti1   | C19   | C20   | 104.37(17)  |
| Cl2   | Ti1   | C19   | C24   | -15.5(3)    | Cl2   | Ti1   | C20   | C16   | 170.39(15)  |
| Cl2   | Ti1   | C20   | C19   | -74.52(16)  | Cl2   | Ti1   | C20   | C25   | 49.3(3)     |
| O1    | Ti1   | C16   | C17   | 126.38(17)  | O1    | Ti1   | C16   | C20   | -119.39(18) |
| O1    | Ti1   | C16   | C21   | 2.5(3)      | O1    | Ti1   | C17   | C16   | -59.18(19)  |
| O1    | Ti1   | C17   | C18   | -175.78(15) | O1    | Ti1   | C17   | C22   | 64.0(3)     |
| O1    | Ti1   | C18   | C17   | 6.9(3)      | O1    | Ti1   | C18   | C19   | -109.2(2)   |
| O1    | Ti1   | C18   | C23   | 126.8(3)    | O1    | Ti1   | C19   | C18   | 118.6(2)    |
| O1    | Ti1   | C19   | C20   | 1.1(3)      | O1    | Ti1   | C19   | C24   | -118.8(3)   |
| O1    | Ti1   | C20   | C16   | 65.6(2)     | O1    | Ti1   | C20   | C19   | -179.29(16) |
| O1    | Ti1   | C20   | C25   | -55.5(3)    | C16   | Ti1   | C17   | C16   | -0.00(17)   |
| C16   | Ti1   | C17   | C18   | -116.6(3)   | C16   | Ti1   | C17   | C22   | 123.1(4)    |
| C17   | Ti1   | C16   | C17   | -0.00(18)   | C17   | Ti1   | C16   | C20   | 114.2(3)    |
| C17   | Ti1   | C16   | C21   | -123.9(4)   | C16   | Ti1   | C18   | C17   | 37.21(16)   |
| C16   | Ti1   | C18   | C19   | -78.8(2)    | C16   | Ti1   | C18   | C23   | 157.2(4)    |
| C18   | Ti1   | C16   | C17   | -36.70(16)  | C18   | Ti1   | C16   | C20   | 77.53(19)   |
| C18   | Ti1   | C16   | C21   | -160.6(3)   | C16   | Ti1   | C19   | C18   | 79.4(2)     |
| C16   | Ti1   | C19   | C20   | -38.19(17)  | C16   | Ti1   | C19   | C24   | -158.1(4)   |
| C19   | Ti1   | C16   | C17   | -76.74(19)  | C19   | Ti1   | C16   | C20   | 37.49(17)   |
| C19   | Ti1   | C16   | C21   | 159.4(3)    | C16   | Ti1   | C20   | C16   | -0.00(18)   |
| C16   | Ti1   | C20   | C19   | 115.1(3)    | C16   | Ti1   | C20   | C25   | -121.1(4)   |
| C20   | Ti1   | C16   | C17   | -114.2(3)   | C20   | Ti1   | C16   | C20   | -0.00(18)   |
| C20   | Ti1   | C16   | C21   | 121.9(4)    | C17   | Ti1   | C18   | C17   | -0.00(18)   |
| C17   | Ti1   | C18   | C19   | -116.0(3)   | C17   | Ti1   | C18   | C23   | 120.0(4)    |
| C18   | Ti1   | C17   | C16   | 116.6(3)    | C18   | Ti1   | C17   | C18   | -0.00(18)   |

Table S11-8. Torsion angles ( $^{\circ}$ ) (continued)

| atom1 | atom2 | atom3 | atom4 | angle       | atom1 | atom2 | atom3 | atom4 | angle       |
|-------|-------|-------|-------|-------------|-------|-------|-------|-------|-------------|
| C18   | Ti1   | C17   | C22   | -120.3(4)   | C17   | Ti1   | C19   | C18   | 37.50(16)   |
| C17   | Ti1   | C19   | C20   | -80.1(2)    | C17   | Ti1   | C19   | C24   | 160.1(4)    |
| C19   | Ti1   | C17   | C16   | 80.0(2)     | C19   | Ti1   | C17   | C18   | -36.60(16)  |
| C19   | Ti1   | C17   | C22   | -156.9(4)   | C17   | Ti1   | C20   | C16   | -38.19(16)  |
| C17   | Ti1   | C20   | C19   | 76.9(2)     | C17   | Ti1   | C20   | C25   | -159.3(4)   |
| C20   | Ti1   | C17   | C16   | 38.53(16)   | C20   | Ti1   | C17   | C18   | -78.07(19)  |
| C20   | Ti1   | C17   | C22   | 161.7(4)    | C18   | Ti1   | C19   | C18   | 0.00(19)    |
| C18   | Ti1   | C19   | C20   | -117.6(3)   | C18   | Ti1   | C19   | C24   | 122.6(4)    |
| C19   | Ti1   | C18   | C17   | 116.0(3)    | C19   | Ti1   | C18   | C19   | 0.00(18)    |
| C19   | Ti1   | C18   | C23   | -124.0(4)   | C18   | Ti1   | C20   | C16   | -79.4(2)    |
| C18   | Ti1   | C20   | C19   | 35.74(16)   | C18   | Ti1   | C20   | C25   | 159.6(4)    |
| C20   | Ti1   | C18   | C17   | 79.3(2)     | C20   | Ti1   | C18   | C19   | -36.77(16)  |
| C20   | Ti1   | C18   | C23   | -160.8(4)   | C19   | Ti1   | C20   | C16   | -115.1(3)   |
| C19   | Ti1   | C20   | C19   | -0.00(19)   | C19   | Ti1   | C20   | C25   | 123.8(4)    |
| C20   | Ti1   | C19   | C18   | 117.6(3)    | C20   | Ti1   | C19   | C20   | 0.00(19)    |
| C20   | Ti1   | C19   | C24   | -119.9(4)   | Cl3   | Ti2   | C41   | C42   | 13.0(2)     |
| Cl3   | Ti2   | C41   | C45   | 128.04(14)  | Cl3   | Ti2   | C41   | C46   | -109.9(3)   |
| Cl3   | Ti2   | C42   | C41   | -169.71(15) | Cl3   | Ti2   | C42   | C43   | 73.95(17)   |
| Cl3   | Ti2   | C42   | C47   | -47.0(3)    | Cl3   | Ti2   | C43   | C42   | -105.11(18) |
| Cl3   | Ti2   | C43   | C44   | 137.84(19)  | Cl3   | Ti2   | C43   | C48   | 16.5(3)     |
| Cl3   | Ti2   | C44   | C43   | -44.9(2)    | Cl3   | Ti2   | C44   | C45   | -160.46(13) |
| Cl3   | Ti2   | C44   | C49   | 76.5(3)     | Cl3   | Ti2   | C45   | C41   | -85.4(2)    |
| Cl3   | Ti2   | C45   | C44   | 30.2(3)     | Cl3   | Ti2   | C45   | C50   | 151.69(18)  |
| Cl4   | Ti2   | C41   | C42   | -132.43(13) | Cl4   | Ti2   | C41   | C45   | -17.4(2)    |
| Cl4   | Ti2   | C41   | C46   | 104.7(3)    | Cl4   | Ti2   | C42   | C41   | 77.0(2)     |
| Cl4   | Ti2   | C42   | C43   | -39.3(3)    | Cl4   | Ti2   | C42   | C47   | -160.23(19) |
| Cl4   | Ti2   | C43   | C42   | 154.63(14)  | Cl4   | Ti2   | C43   | C44   | 37.6(2)     |
| Cl4   | Ti2   | C43   | C48   | -83.8(3)    | Cl4   | Ti2   | C44   | C43   | -145.18(18) |
| Cl4   | Ti2   | C44   | C45   | 99.22(17)   | Cl4   | Ti2   | C44   | C49   | -23.8(3)    |
| Cl4   | Ti2   | C45   | C41   | 165.66(16)  | Cl4   | Ti2   | C45   | C44   | -78.72(16)  |
| Cl4   | Ti2   | C45   | C50   | 42.7(3)     | O2    | Ti2   | C41   | C42   | 121.91(18)  |
| O2    | Ti2   | C41   | C45   | -123.02(18) | O2    | Ti2   | C41   | C46   | -0.9(3)     |
| O2    | Ti2   | C42   | C41   | -64.1(2)    | O2    | Ti2   | C42   | C43   | 179.59(16)  |
| O2    | Ti2   | C42   | C47   | 58.7(3)     | O2    | Ti2   | C43   | C42   | -0.6(4)     |
| O2    | Ti2   | C43   | C44   | -117.7(2)   | O2    | Ti2   | C43   | C48   | 120.9(3)    |
| O2    | Ti2   | C44   | C43   | 113.6(3)    | O2    | Ti2   | C44   | C45   | -2.0(4)     |
| O2    | Ti2   | C44   | C49   | -125.0(3)   | O2    | Ti2   | C45   | C41   | 63.2(2)     |

Table S11-8. Torsion angles ( $^{\circ}$ ) (continued)

| atom1 | atom2 | atom3 | atom4 | angle      | atom1 | atom2 | atom3 | atom4 | angle       |
|-------|-------|-------|-------|------------|-------|-------|-------|-------|-------------|
| O2    | Ti2   | C45   | C44   | 178.78(16) | O2    | Ti2   | C45   | C50   | -59.8(3)    |
| C41   | Ti2   | C42   | C41   | -0.00(18)  | C41   | Ti2   | C42   | C43   | -116.3(3)   |
| C41   | Ti2   | C42   | C47   | 122.8(4)   | C42   | Ti2   | C41   | C42   | 0.00(19)    |
| C42   | Ti2   | C41   | C45   | 115.1(3)   | C42   | Ti2   | C41   | C46   | -122.8(4)   |
| C41   | Ti2   | C43   | C42   | 37.26(17)  | C41   | Ti2   | C43   | C44   | -79.8(2)    |
| C41   | Ti2   | C43   | C48   | 158.9(4)   | C43   | Ti2   | C41   | C42   | -36.78(17)  |
| C43   | Ti2   | C41   | C45   | 78.3(2)    | C43   | Ti2   | C41   | C46   | -159.6(3)   |
| C41   | Ti2   | C44   | C43   | 77.9(2)    | C41   | Ti2   | C44   | C45   | -37.68(17)  |
| C41   | Ti2   | C44   | C49   | -160.7(4)  | C44   | Ti2   | C41   | C42   | -77.6(2)    |
| C44   | Ti2   | C41   | C45   | 37.51(17)  | C44   | Ti2   | C41   | C46   | 159.6(4)    |
| C41   | Ti2   | C45   | C41   | 0.00(19)   | C41   | Ti2   | C45   | C44   | 115.6(3)    |
| C41   | Ti2   | C45   | C50   | -122.9(4)  | C45   | Ti2   | C41   | C42   | -115.1(3)   |
| C45   | Ti2   | C41   | C45   | -0.00(19)  | C45   | Ti2   | C41   | C46   | 122.1(4)    |
| C42   | Ti2   | C43   | C42   | -0.0(2)    | C42   | Ti2   | C43   | C44   | -117.1(4)   |
| C42   | Ti2   | C43   | C48   | 121.6(5)   | C43   | Ti2   | C42   | C41   | 116.3(3)    |
| C43   | Ti2   | C42   | C43   | -0.0(2)    | C43   | Ti2   | C42   | C47   | -120.9(5)   |
| C42   | Ti2   | C44   | C43   | 36.57(17)  | C42   | Ti2   | C44   | C45   | -79.0(2)    |
| C42   | Ti2   | C44   | C49   | 158.0(4)   | C44   | Ti2   | C42   | C41   | 79.8(2)     |
| C44   | Ti2   | C42   | C43   | -36.56(18) | C44   | Ti2   | C42   | C47   | -157.5(4)   |
| C42   | Ti2   | C45   | C41   | -37.63(17) | C42   | Ti2   | C45   | C44   | 78.0(2)     |
| C42   | Ti2   | C45   | C50   | -160.6(4)  | C45   | Ti2   | C42   | C41   | 38.05(17)   |
| C45   | Ti2   | C42   | C43   | -78.3(2)   | C45   | Ti2   | C42   | C47   | 160.8(4)    |
| C43   | Ti2   | C44   | C43   | 0.0(2)     | C43   | Ti2   | C44   | C45   | -115.6(3)   |
| C43   | Ti2   | C44   | C49   | 121.4(5)   | C44   | Ti2   | C43   | C42   | 117.1(4)    |
| C44   | Ti2   | C43   | C44   | 0.0(2)     | C44   | Ti2   | C43   | C48   | -121.3(5)   |
| C43   | Ti2   | C45   | C41   | -78.5(2)   | C43   | Ti2   | C45   | C44   | 37.08(17)   |
| C43   | Ti2   | C45   | C50   | 158.5(4)   | C45   | Ti2   | C43   | C42   | 79.2(2)     |
| C45   | Ti2   | C43   | C44   | -37.84(18) | C45   | Ti2   | C43   | C48   | -159.2(4)   |
| C44   | Ti2   | C45   | C41   | -115.6(3)  | C44   | Ti2   | C45   | C44   | 0.00(19)    |
| C44   | Ti2   | C45   | C50   | 121.5(4)   | C45   | Ti2   | C44   | C43   | 115.6(3)    |
| C45   | Ti2   | C44   | C45   | 0.00(19)   | C45   | Ti2   | C44   | C49   | -123.0(5)   |
| Cl5   | Ti3   | C66   | C67   | -19.3(2)   | Cl5   | Ti3   | C66   | C70   | -134.17(14) |
| Cl5   | Ti3   | C66   | C71   | 102.5(3)   | Cl5   | Ti3   | C67   | C66   | 163.92(17)  |
| Cl5   | Ti3   | C67   | C68   | -81.17(18) | Cl5   | Ti3   | C67   | C72   | 41.4(3)     |
| Cl5   | Ti3   | C68   | C67   | 96.84(19)  | Cl5   | Ti3   | C68   | C69   | -145.6(2)   |
| Cl5   | Ti3   | C68   | C73   | -26.2(3)   | Cl5   | Ti3   | C69   | C68   | 37.3(2)     |
| Cl5   | Ti3   | C69   | C70   | 154.16(14) | Cl5   | Ti3   | C69   | C74   | -86.9(3)    |

Table S11-8. Torsion angles ( $^{\circ}$ ) (continued)

| atom1 | atom2 | atom3 | atom4 | angle       | atom1 | atom2 | atom3 | atom4 | angle       |
|-------|-------|-------|-------|-------------|-------|-------|-------|-------|-------------|
| Cl5   | Ti3   | C70   | C66   | 75.0(2)     | Cl5   | Ti3   | C70   | C69   | -40.5(3)    |
| Cl5   | Ti3   | C70   | C75   | -161.64(17) | Cl6   | Ti3   | C66   | C67   | 126.31(15)  |
| Cl6   | Ti3   | C66   | C70   | 11.4(3)     | Cl6   | Ti3   | C66   | C71   | -111.9(3)   |
| Cl6   | Ti3   | C67   | C66   | -88.3(2)    | Cl6   | Ti3   | C67   | C68   | 26.6(3)     |
| Cl6   | Ti3   | C67   | C72   | 149.2(2)    | Cl6   | Ti3   | C68   | C67   | -162.69(15) |
| Cl6   | Ti3   | C68   | C69   | -45.1(2)    | Cl6   | Ti3   | C68   | C73   | 74.3(4)     |
| Cl6   | Ti3   | C69   | C68   | 137.37(18)  | Cl6   | Ti3   | C69   | C70   | -105.75(17) |
| Cl6   | Ti3   | C69   | C74   | 13.2(3)     | Cl6   | Ti3   | C70   | C66   | -171.07(14) |
| Cl6   | Ti3   | C70   | C69   | 73.42(16)   | Cl6   | Ti3   | C70   | C75   | -47.7(3)    |
| O3    | Ti3   | C66   | C67   | -124.84(19) | O3    | Ti3   | C66   | C70   | 120.27(19)  |
| O3    | Ti3   | C66   | C71   | -3.1(3)     | O3    | Ti3   | C67   | C66   | 61.3(2)     |
| O3    | Ti3   | C67   | C68   | 176.19(17)  | O3    | Ti3   | C67   | C72   | -61.2(4)    |
| O3    | Ti3   | C68   | C67   | -6.3(4)     | O3    | Ti3   | C68   | C69   | 111.2(3)    |
| O3    | Ti3   | C68   | C73   | -129.3(3)   | O3    | Ti3   | C69   | C68   | -118.4(2)   |
| O3    | Ti3   | C69   | C70   | -1.5(4)     | O3    | Ti3   | C69   | C74   | 117.4(3)    |
| O3    | Ti3   | C70   | C66   | -65.48(19)  | O3    | Ti3   | C70   | C69   | 179.02(16)  |
| O3    | Ti3   | C70   | C75   | 57.9(3)     | C66   | Ti3   | C67   | C66   | -0.0(2)     |
| C66   | Ti3   | C67   | C68   | 114.9(4)    | C66   | Ti3   | C67   | C72   | -122.5(5)   |
| C67   | Ti3   | C66   | C67   | 0.0(2)      | C67   | Ti3   | C66   | C70   | -114.9(3)   |
| C67   | Ti3   | C66   | C71   | 121.8(5)    | C66   | Ti3   | C68   | C67   | -38.14(19)  |
| C66   | Ti3   | C68   | C69   | 79.4(2)     | C66   | Ti3   | C68   | C73   | -161.1(4)   |
| C68   | Ti3   | C66   | C67   | 37.8(2)     | C68   | Ti3   | C66   | C70   | -77.1(2)    |
| C68   | Ti3   | C66   | C71   | 159.5(4)    | C66   | Ti3   | C69   | C68   | -78.9(2)    |
| C66   | Ti3   | C69   | C70   | 38.02(19)   | C66   | Ti3   | C69   | C74   | 157.0(4)    |
| C69   | Ti3   | C66   | C67   | 77.7(2)     | C69   | Ti3   | C66   | C70   | -37.24(18)  |
| C69   | Ti3   | C66   | C71   | -160.6(4)   | C66   | Ti3   | C70   | C66   | -0.0(2)     |
| C66   | Ti3   | C70   | C69   | -115.5(3)   | C66   | Ti3   | C70   | C75   | 123.3(4)    |
| C70   | Ti3   | C66   | C67   | 114.9(3)    | C70   | Ti3   | C66   | C70   | -0.00(17)   |
| C70   | Ti3   | C66   | C71   | -123.3(5)   | C67   | Ti3   | C68   | C67   | -0.0(2)     |
| C67   | Ti3   | C68   | C69   | 117.5(4)    | C67   | Ti3   | C68   | C73   | -123.0(5)   |
| C68   | Ti3   | C67   | C66   | -114.9(4)   | C68   | Ti3   | C67   | C68   | -0.0(2)     |
| C68   | Ti3   | C67   | C72   | 122.6(5)    | C67   | Ti3   | C69   | C68   | -36.95(19)  |
| C67   | Ti3   | C69   | C70   | 79.9(2)     | C67   | Ti3   | C69   | C74   | -161.1(4)   |
| C69   | Ti3   | C67   | C66   | -79.3(2)    | C69   | Ti3   | C67   | C68   | 35.59(18)   |
| C69   | Ti3   | C67   | C72   | 158.2(4)    | C67   | Ti3   | C70   | C66   | 37.96(17)   |
| C67   | Ti3   | C70   | C69   | -77.5(2)    | C67   | Ti3   | C70   | C75   | 161.3(4)    |
| C70   | Ti3   | C67   | C66   | -38.14(17)  | C70   | Ti3   | C67   | C68   | 76.8(2)     |

Table S11-8. Torsion angles ( $^{\circ}$ ) (continued)

| atom1 | atom2 | atom3 | atom4 | angle      | atom1 | atom2 | atom3 | atom4 | angle      |
|-------|-------|-------|-------|------------|-------|-------|-------|-------|------------|
| C70   | Ti3   | C67   | C72   | -160.6(4)  | C68   | Ti3   | C69   | C68   | -0.0(2)    |
| C68   | Ti3   | C69   | C70   | 116.9(4)   | C68   | Ti3   | C69   | C74   | -124.2(5)  |
| C69   | Ti3   | C68   | C67   | -117.5(4)  | C69   | Ti3   | C68   | C69   | -0.0(2)    |
| C69   | Ti3   | C68   | C73   | 119.5(5)   | C68   | Ti3   | C70   | C66   | 79.5(2)    |
| C68   | Ti3   | C70   | C69   | -36.02(19) | C68   | Ti3   | C70   | C75   | -157.2(4)  |
| C70   | Ti3   | C68   | C67   | -80.4(2)   | C70   | Ti3   | C68   | C69   | 37.17(18)  |
| C70   | Ti3   | C68   | C73   | 156.6(4)   | C69   | Ti3   | C70   | C66   | 115.5(3)   |
| C69   | Ti3   | C70   | C69   | 0.0(2)     | C69   | Ti3   | C70   | C75   | -121.2(4)  |
| C70   | Ti3   | C69   | C68   | -116.9(3)  | C70   | Ti3   | C69   | C70   | 0.00(19)   |
| C70   | Ti3   | C69   | C74   | 118.9(5)   | C1    | N1    | C26   | C27   | -162.1(3)  |
| C26   | N1    | C1    | C2    | 78.1(4)    | C1    | N1    | C51   | C52   | 76.0(4)    |
| C51   | N1    | C1    | C2    | -159.2(3)  | C26   | N1    | C51   | C52   | -161.2(3)  |
| C51   | N1    | C26   | C27   | 75.0(4)    | N1    | C1    | C2    | C3    | -170.9(3)  |
| N1    | C1    | C2    | C7    | 9.5(5)     | C1    | C2    | C3    | O1    | 2.3(6)     |
| C1    | C2    | C3    | C4    | -178.0(3)  | C1    | C2    | C7    | C6    | -179.5(4)  |
| C3    | C2    | C7    | C6    | 0.9(6)     | C7    | C2    | C3    | O1    | -178.1(4)  |
| C7    | C2    | C3    | C4    | 1.7(6)     | O1    | C3    | C4    | C5    | 177.3(3)   |
| O1    | C3    | C4    | C12   | 0.4(6)     | C2    | C3    | C4    | C5    | -2.4(6)    |
| C2    | C3    | C4    | C12   | -179.3(3)  | C3    | C4    | C5    | C6    | 0.8(6)     |
| C3    | C4    | C12   | C13   | -56.7(5)   | C3    | C4    | C12   | C14   | 64.7(5)    |
| C3    | C4    | C12   | C15   | -174.9(3)  | C5    | C4    | C12   | C13   | 126.6(4)   |
| C5    | C4    | C12   | C14   | -112.1(4)  | C5    | C4    | C12   | C15   | 8.3(5)     |
| C12   | C4    | C5    | C6    | 177.8(3)   | C4    | C5    | C6    | C7    | 1.6(6)     |
| C4    | C5    | C6    | C8    | -179.0(4)  | C5    | C6    | C7    | C2    | -2.5(6)    |
| C5    | C6    | C8    | C9    | -120.9(4)  | C5    | C6    | C8    | C10   | 119.6(4)   |
| C5    | C6    | C8    | C11   | -0.7(6)    | C7    | C6    | C8    | C9    | 58.5(5)    |
| C7    | C6    | C8    | C10   | -61.0(5)   | C7    | C6    | C8    | C11   | 178.7(4)   |
| C8    | C6    | C7    | C2    | 178.1(4)   | Ti1   | C16   | C17   | Ti1   | 0.000(17)  |
| Ti1   | C16   | C17   | C18   | 65.0(3)    | Ti1   | C16   | C17   | C22   | -120.8(4)  |
| Ti1   | C16   | C20   | Ti1   | -0.000(18) | Ti1   | C16   | C20   | C19   | -66.7(2)   |
| Ti1   | C16   | C20   | C25   | 121.0(4)   | C17   | C16   | C20   | Ti1   | 66.2(3)    |
| C17   | C16   | C20   | C19   | -0.4(5)    | C17   | C16   | C20   | C25   | -172.8(4)  |
| C20   | C16   | C17   | Ti1   | -65.4(3)   | C20   | C16   | C17   | C18   | -0.4(5)    |
| C20   | C16   | C17   | C22   | 173.8(4)   | C21   | C16   | C17   | Ti1   | 118.7(5)   |
| C21   | C16   | C17   | C18   | -176.3(4)  | C21   | C16   | C17   | C22   | -2.1(7)    |
| C21   | C16   | C20   | Ti1   | -117.8(4)  | C21   | C16   | C20   | C19   | 175.5(4)   |
| C21   | C16   | C20   | C25   | 3.2(7)     | Ti1   | C17   | C18   | Ti1   | -0.000(18) |

Table S11-8. Torsion angles ( $^{\circ}$ ) (continued)

| atom1 | atom2 | atom3 | atom4 | angle      | atom1 | atom2 | atom3 | atom4 | angle     |
|-------|-------|-------|-------|------------|-------|-------|-------|-------|-----------|
| Ti1   | C17   | C18   | C19   | 64.3(3)    | Ti1   | C17   | C18   | C23   | -120.3(4) |
| C16   | C17   | C18   | Ti1   | -63.2(3)   | C16   | C17   | C18   | C19   | 1.1(5)    |
| C16   | C17   | C18   | C23   | 176.5(4)   | C22   | C17   | C18   | Ti1   | 122.3(4)  |
| C22   | C17   | C18   | C19   | -173.4(4)  | C22   | C17   | C18   | C23   | 2.0(7)    |
| Ti1   | C18   | C19   | Ti1   | -0.000(19) | Ti1   | C18   | C19   | C20   | 62.1(3)   |
| Ti1   | C18   | C19   | C24   | -121.8(4)  | C17   | C18   | C19   | Ti1   | -63.4(3)  |
| C17   | C18   | C19   | C20   | -1.3(5)    | C17   | C18   | C19   | C24   | 174.8(4)  |
| C23   | C18   | C19   | Ti1   | 121.4(5)   | C23   | C18   | C19   | C20   | -176.6(4) |
| C23   | C18   | C19   | C24   | -0.5(7)    | Ti1   | C19   | C20   | Ti1   | 0.000(19) |
| Ti1   | C19   | C20   | C16   | 64.9(2)    | Ti1   | C19   | C20   | C25   | -122.8(4) |
| C18   | C19   | C20   | Ti1   | -63.9(3)   | C18   | C19   | C20   | C16   | 1.1(5)    |
| C18   | C19   | C20   | C25   | 173.4(4)   | C24   | C19   | C20   | Ti1   | 120.0(5)  |
| C24   | C19   | C20   | C16   | -175.0(4)  | C24   | C19   | C20   | C25   | -2.8(7)   |
| N1    | C26   | C27   | C28   | -162.1(3)  | N1    | C26   | C27   | C32   | 16.2(5)   |
| C26   | C27   | C28   | O2    | -0.5(6)    | C26   | C27   | C28   | C29   | 177.7(3)  |
| C26   | C27   | C32   | C31   | -177.5(4)  | C28   | C27   | C32   | C31   | 0.8(7)    |
| C32   | C27   | C28   | O2    | -178.9(4)  | C32   | C27   | C28   | C29   | -0.7(6)   |
| O2    | C28   | C29   | C30   | 178.5(4)   | O2    | C28   | C29   | C37   | 0.2(7)    |
| C27   | C28   | C29   | C30   | 0.3(6)     | C27   | C28   | C29   | C37   | -177.9(4) |
| C28   | C29   | C30   | C31   | -0.1(7)    | C28   | C29   | C37   | C38   | 64.2(6)   |
| C28   | C29   | C37   | C39   | -178.6(4)  | C28   | C29   | C37   | C40   | -57.3(6)  |
| C30   | C29   | C37   | C38   | -113.9(5)  | C30   | C29   | C37   | C39   | 3.2(7)    |
| C30   | C29   | C37   | C40   | 124.5(5)   | C37   | C29   | C30   | C31   | 178.1(4)  |
| C29   | C30   | C31   | C32   | 0.3(7)     | C29   | C30   | C31   | C33   | -177.2(4) |
| C30   | C31   | C32   | C27   | -0.7(7)    | C30   | C31   | C33   | C34   | -168.5(4) |
| C30   | C31   | C33   | C35   | 73.9(5)    | C30   | C31   | C33   | C36   | -39.2(6)  |
| C32   | C31   | C33   | C34   | 14.1(7)    | C32   | C31   | C33   | C35   | -103.5(5) |
| C32   | C31   | C33   | C36   | 143.4(4)   | C33   | C31   | C32   | C27   | 176.8(4)  |
| Ti2   | C41   | C42   | Ti2   | -0.00(2)   | Ti2   | C41   | C42   | C43   | 65.3(3)   |
| Ti2   | C41   | C42   | C47   | -122.5(4)  | Ti2   | C41   | C45   | Ti2   | -0.00(2)  |
| Ti2   | C41   | C45   | C44   | -66.5(3)   | Ti2   | C41   | C45   | C50   | 119.5(4)  |
| C42   | C41   | C45   | Ti2   | 65.6(3)    | C42   | C41   | C45   | C44   | -1.0(5)   |
| C42   | C41   | C45   | C50   | -174.9(4)  | C45   | C41   | C42   | Ti2   | -64.6(3)  |
| C45   | C41   | C42   | C43   | 0.7(5)     | C45   | C41   | C42   | C47   | 172.9(4)  |
| C46   | C41   | C42   | Ti2   | 118.3(5)   | C46   | C41   | C42   | C43   | -176.4(4) |
| C46   | C41   | C42   | C47   | -4.2(7)    | C46   | C41   | C45   | Ti2   | -117.3(5) |
| C46   | C41   | C45   | C44   | 176.2(4)   | C46   | C41   | C45   | C50   | 2.2(7)    |



Table S11-8. Torsion angles ( $^{\circ}$ ) (continued)

| atom1 | atom2 | atom3 | atom4 | angle     | atom1 | atom2 | atom3 | atom4 | angle     |
|-------|-------|-------|-------|-----------|-------|-------|-------|-------|-----------|
| Ti2   | C42   | C43   | Ti2   | -0.00(2)  | Ti2   | C42   | C43   | C44   | 63.6(3)   |
| Ti2   | C42   | C43   | C48   | -120.7(4) | C41   | C42   | C43   | Ti2   | -63.8(3)  |
| C41   | C42   | C43   | C44   | -0.2(5)   | C41   | C42   | C43   | C48   | 175.5(4)  |
| C47   | C42   | C43   | Ti2   | 123.8(5)  | C47   | C42   | C43   | C44   | -172.6(4) |
| C47   | C42   | C43   | C48   | 3.0(8)    | Ti2   | C43   | C44   | Ti2   | 0.00(2)   |
| Ti2   | C43   | C44   | C45   | 62.6(3)   | Ti2   | C43   | C44   | C49   | -118.9(4) |
| C42   | C43   | C44   | Ti2   | -63.0(4)  | C42   | C43   | C44   | C45   | -0.5(5)   |
| C42   | C43   | C44   | C49   | 178.0(4)  | C48   | C43   | C44   | Ti2   | 121.3(5)  |
| C48   | C43   | C44   | C45   | -176.2(4) | C48   | C43   | C44   | C49   | 2.3(8)    |
| Ti2   | C44   | C45   | Ti2   | 0.00(2)   | Ti2   | C44   | C45   | C41   | 65.3(3)   |
| Ti2   | C44   | C45   | C50   | -120.6(4) | C43   | C44   | C45   | Ti2   | -64.4(3)  |
| C43   | C44   | C45   | C41   | 0.9(5)    | C43   | C44   | C45   | C50   | 175.0(4)  |
| C49   | C44   | C45   | Ti2   | 117.1(5)  | C49   | C44   | C45   | C41   | -177.6(4) |
| C49   | C44   | C45   | C50   | -3.5(8)   | N1    | C51   | C52   | C53   | -163.6(3) |
| N1    | C51   | C52   | C57   | 16.6(5)   | C51   | C52   | C53   | O3    | -0.6(6)   |
| C51   | C52   | C53   | C54   | 177.0(3)  | C51   | C52   | C57   | C56   | -178.4(3) |
| C53   | C52   | C57   | C56   | 1.8(6)    | C57   | C52   | C53   | O3    | 179.2(3)  |
| C57   | C52   | C53   | C54   | -3.2(6)   | O3    | C53   | C54   | C55   | -179.6(3) |
| O3    | C53   | C54   | C62   | 3.4(6)    | C52   | C53   | C54   | C55   | 2.9(6)    |
| C52   | C53   | C54   | C62   | -174.1(3) | C53   | C54   | C55   | C56   | -1.4(6)   |
| C53   | C54   | C62   | C63   | 61.3(5)   | C53   | C54   | C62   | C64   | -179.6(4) |
| C53   | C54   | C62   | C65   | -60.5(5)  | C55   | C54   | C62   | C63   | -115.6(4) |
| C55   | C54   | C62   | C64   | 3.5(6)    | C55   | C54   | C62   | C65   | 122.6(4)  |
| C62   | C54   | C55   | C56   | 175.7(4)  | C54   | C55   | C56   | C57   | 0.0(7)    |
| C54   | C55   | C56   | C58   | -178.7(4) | C55   | C56   | C57   | C52   | -0.2(6)   |
| C55   | C56   | C58   | C59   | -176.9(4) | C55   | C56   | C58   | C60   | 62.1(5)   |
| C55   | C56   | C58   | C61   | -54.3(6)  | C57   | C56   | C58   | C59   | 4.5(7)    |
| C57   | C56   | C58   | C60   | -116.5(4) | C57   | C56   | C58   | C61   | 127.0(4)  |
| C58   | C56   | C57   | C52   | 178.5(4)  | Ti3   | C66   | C67   | Ti3   | 0.00(2)   |
| Ti3   | C66   | C67   | C68   | -66.0(3)  | Ti3   | C66   | C67   | C72   | 120.3(4)  |
| Ti3   | C66   | C70   | Ti3   | 0.000(18) | Ti3   | C66   | C70   | C69   | 65.1(2)   |
| Ti3   | C66   | C70   | C75   | -122.3(4) | C67   | C66   | C70   | Ti3   | -65.5(3)  |
| C67   | C66   | C70   | C69   | -0.4(5)   | C67   | C66   | C70   | C75   | 172.2(4)  |
| C70   | C66   | C67   | Ti3   | 65.9(3)   | C70   | C66   | C67   | C68   | -0.1(5)   |
| C70   | C66   | C67   | C72   | -173.8(4) | C71   | C66   | C67   | Ti3   | -116.6(5) |
| C71   | C66   | C67   | C68   | 177.4(4)  | C71   | C66   | C67   | C72   | 3.7(7)    |
| C71   | C66   | C70   | Ti3   | 117.1(5)  | C71   | C66   | C70   | C69   | -177.8(4) |

Table S11-8. Torsion angles ( $^{\circ}$ ) (continued)

| atom1 | atom2 | atom3 | atom4 | angle      | atom1 | atom2 | atom3 | atom4 | angle     |
|-------|-------|-------|-------|------------|-------|-------|-------|-------|-----------|
| C71   | C66   | C70   | C75   | -5.2(7)    | Ti3   | C67   | C68   | Ti3   | 0.00(2)   |
| Ti3   | C67   | C68   | C69   | -64.0(3)   | Ti3   | C67   | C68   | C73   | 117.3(5)  |
| C66   | C67   | C68   | Ti3   | 64.5(3)    | C66   | C67   | C68   | C69   | 0.6(5)    |
| C66   | C67   | C68   | C73   | -178.2(4)  | C72   | C67   | C68   | Ti3   | -121.7(5) |
| C72   | C67   | C68   | C69   | 174.4(5)   | C72   | C67   | C68   | C73   | -4.4(8)   |
| Ti3   | C68   | C69   | Ti3   | -0.000(18) | Ti3   | C68   | C69   | C70   | -63.4(3)  |
| Ti3   | C68   | C69   | C74   | 122.3(4)   | C67   | C68   | C69   | Ti3   | 62.5(3)   |
| C67   | C68   | C69   | C70   | -0.8(5)    | C67   | C68   | C69   | C74   | -175.2(4) |
| C73   | C68   | C69   | Ti3   | -118.7(5)  | C73   | C68   | C69   | C70   | 178.0(4)  |
| C73   | C68   | C69   | C74   | 3.6(8)     | Ti3   | C69   | C70   | Ti3   | 0.00(2)   |
| Ti3   | C69   | C70   | C66   | -63.4(2)   | Ti3   | C69   | C70   | C75   | 123.7(4)  |
| C68   | C69   | C70   | Ti3   | 64.2(3)    | C68   | C69   | C70   | C66   | 0.8(5)    |
| C68   | C69   | C70   | C75   | -172.2(4)  | C74   | C69   | C70   | Ti3   | -121.2(5) |
| C74   | C69   | C70   | C66   | 175.4(4)   | C74   | C69   | C70   | C75   | 2.4(7)    |

Table S11-9. Intramolecular contacts less than 3.60 Å

| atom | atom | distance | atom | atom | distance |
|------|------|----------|------|------|----------|
| Cl1  | C23  | 3.308(5) | Cl2  | C24  | 3.221(5) |
| Cl3  | C48  | 3.220(6) | Cl4  | C38  | 3.522(6) |
| Cl4  | C49  | 3.188(6) | Cl4  | C50  | 3.544(5) |
| Cl5  | C72  | 3.538(7) | Cl5  | C73  | 3.237(6) |
| Cl6  | C74  | 3.209(6) | O1   | C1   | 2.798(5) |
| O1   | C12  | 2.973(5) | O1   | C13  | 3.021(5) |
| O1   | C14  | 3.162(6) | O1   | C21  | 3.211(5) |
| O2   | C26  | 2.783(5) | O2   | C37  | 2.976(5) |
| O2   | C38  | 3.138(6) | O2   | C40  | 3.048(6) |
| O2   | C46  | 3.252(6) | O3   | C22  | 3.531(6) |
| O3   | C51  | 2.795(5) | O3   | C62  | 2.978(5) |
| O3   | C63  | 3.116(6) | O3   | C65  | 3.081(6) |
| O3   | C71  | 3.209(6) | N1   | C7   | 2.768(6) |
| N1   | C32  | 2.802(6) | N1   | C57  | 2.799(6) |
| C1   | C22  | 3.492(7) | C1   | C52  | 3.085(6) |
| C1   | C57  | 3.250(6) | C2   | C5   | 2.763(6) |
| C2   | C26  | 3.073(6) | C3   | C6   | 2.799(6) |
| C3   | C13  | 3.102(6) | C3   | C14  | 3.162(7) |
| C3   | C21  | 3.553(6) | C4   | C7   | 2.809(6) |
| C5   | C10  | 3.599(7) | C5   | C11  | 2.885(7) |
| C5   | C14  | 3.533(7) | C5   | C15  | 2.838(7) |
| C7   | C9   | 3.049(7) | C7   | C10  | 3.039(7) |
| C7   | C26  | 3.186(6) | C13  | C25  | 3.431(7) |
| C21  | C22  | 3.243(7) | C21  | C25  | 3.169(7) |
| C22  | C23  | 3.104(7) | C22  | C52  | 3.581(6) |
| C22  | C53  | 3.513(6) | C23  | C24  | 3.178(7) |
| C24  | C25  | 3.167(7) | C26  | C47  | 3.530(7) |
| C27  | C30  | 2.765(6) | C27  | C51  | 3.050(6) |
| C27  | C75  | 3.520(7) | C28  | C31  | 2.813(6) |
| C28  | C38  | 3.136(7) | C28  | C40  | 3.114(7) |
| C28  | C75  | 3.471(7) | C29  | C32  | 2.801(6) |
| C30  | C35  | 3.183(9) | C30  | C36  | 2.940(8) |
| C30  | C38  | 3.543(7) | C30  | C39  | 2.850(7) |
| C32  | C34  | 2.879(9) | C32  | C35  | 3.476(9) |
| C32  | C51  | 3.230(6) | C46  | C47  | 3.205(7) |
| C46  | C50  | 3.201(6) | C47  | C48  | 3.142(7) |
| C48  | C49  | 3.144(7) | C49  | C50  | 3.189(7) |

Table S11-9. Intramolecular contacts less than 3.60 Å (continued)

| atom | atom | distance | atom | atom | distance |
|------|------|----------|------|------|----------|
| C51  | C75  | 3.443(6) | C52  | C55  | 2.759(6) |
| C53  | C56  | 2.807(6) | C53  | C63  | 3.118(6) |
| C53  | C65  | 3.157(7) | C53  | C71  | 3.532(7) |
| C54  | C57  | 2.827(6) | C55  | C60  | 3.018(9) |
| C55  | C61  | 3.025(9) | C55  | C63  | 3.536(7) |
| C55  | C64  | 2.818(7) | C57  | C59  | 2.863(8) |
| C57  | C60  | 3.534(8) | C71  | C72  | 3.173(9) |
| C71  | C75  | 3.236(8) | C72  | C73  | 3.204(9) |
| C73  | C74  | 3.126(9) | C74  | C75  | 3.096(8) |

Table S11-10. Intramolecular contacts less than 3.60 Å involving hydrogens

| atom | atom | distance | atom | atom | distance |
|------|------|----------|------|------|----------|
| Ti1  | H1A  | 3.243    | Ti1  | H1B  | 3.510    |
| Ti1  | H13C | 2.990    | Ti1  | H14B | 3.350    |
| Ti1  | H21C | 3.340    | Ti1  | H22B | 3.461    |
| Ti1  | H23B | 3.455    | Ti1  | H24C | 3.476    |
| Ti1  | H25C | 3.431    | Ti2  | H26A | 3.104    |
| Ti2  | H38A | 3.297    | Ti2  | H40A | 3.079    |
| Ti2  | H46B | 3.343    | Ti2  | H47B | 3.486    |
| Ti2  | H48C | 3.460    | Ti2  | H49C | 3.384    |
| Ti2  | H50B | 3.375    | Ti3  | H51A | 3.192    |
| Ti3  | H51B | 3.566    | Ti3  | H63A | 3.332    |
| Ti3  | H65A | 3.037    | Ti3  | H71C | 3.299    |
| Ti3  | H72B | 3.386    | Ti3  | H73C | 3.394    |
| Ti3  | H74B | 3.472    | Ti3  | H75B | 3.471    |
| Cl1  | H1A  | 2.930    | Cl1  | H22B | 3.042    |
| Cl1  | H23A | 3.264    | Cl1  | H23B | 2.966    |
| Cl1  | H47B | 3.069    | Cl1  | H48C | 3.485    |
| Cl2  | H13C | 3.106    | Cl2  | H14B | 2.819    |
| Cl2  | H24A | 3.227    | Cl2  | H24C | 2.831    |
| Cl2  | H25C | 3.161    | Cl3  | H26A | 2.758    |
| Cl3  | H47B | 3.208    | Cl3  | H48A | 3.598    |
| Cl3  | H48C | 2.580    | Cl3  | H74A | 3.412    |
| Cl3  | H75B | 3.057    | Cl4  | H38A | 2.713    |
| Cl4  | H38C | 3.536    | Cl4  | H40A | 3.217    |
| Cl4  | H49A | 3.140    | Cl4  | H49C | 2.837    |
| Cl4  | H50A | 3.367    | Cl4  | H50B | 3.398    |
| Cl5  | H63A | 2.848    | Cl5  | H65A | 3.050    |
| Cl5  | H72A | 3.375    | Cl5  | H72B | 3.376    |
| Cl5  | H73A | 3.186    | Cl5  | H73C | 2.898    |
| Cl6  | H22B | 2.870    | Cl6  | H51A | 2.885    |
| Cl6  | H74A | 3.228    | Cl6  | H74B | 2.811    |
| Cl6  | H75B | 3.226    | O1   | H1A  | 2.611    |
| O1   | H1B  | 2.861    | O1   | H13B | 3.463    |
| O1   | H13C | 2.345    | O1   | H14B | 2.525    |
| O1   | H21A | 3.482    | O1   | H21C | 2.711    |
| O1   | H47B | 3.549    | O2   | H26A | 2.513    |
| O2   | H26B | 2.935    | O2   | H38A | 2.485    |
| O2   | H40A | 2.360    | O2   | H40C | 3.543    |

Table S11-10. Intramolecular contacts less than 3.60 Å involving hydrogens (continued)

| atom | atom | distance | atom | atom | distance |
|------|------|----------|------|------|----------|
| O2   | H46A | 3.487    | O2   | H46B | 2.772    |
| O2   | H75B | 3.262    | O2   | H75C | 3.579    |
| O3   | H22A | 3.172    | O3   | H22B | 3.459    |
| O3   | H22C | 3.383    | O3   | H51A | 2.545    |
| O3   | H51B | 2.930    | O3   | H63A | 2.453    |
| O3   | H65A | 2.413    | O3   | H65C | 3.563    |
| O3   | H71A | 3.435    | O3   | H71C | 2.724    |
| N1   | H7   | 2.382    | N1   | H32  | 2.441    |
| N1   | H57  | 2.435    | C1   | H7   | 2.644    |
| C1   | H21A | 3.112    | C1   | H21C | 3.510    |
| C1   | H22A | 3.007    | C1   | H22B | 3.280    |
| C1   | H26A | 2.726    | C1   | H26B | 2.466    |
| C1   | H47A | 3.557    | C1   | H47B | 3.281    |
| C1   | H51A | 2.511    | C1   | H51B | 3.250    |
| C1   | H57  | 2.915    | C2   | H21A | 3.487    |
| C2   | H21C | 3.240    | C2   | H26B | 2.675    |
| C2   | H47A | 3.133    | C2   | H47B | 3.444    |
| C2   | H57  | 3.316    | C3   | H1A  | 2.704    |
| C3   | H1B  | 2.817    | C3   | H5   | 3.244    |
| C3   | H7   | 3.257    | C3   | H13B | 3.330    |
| C3   | H13C | 2.813    | C3   | H14B | 2.878    |
| C3   | H14C | 3.424    | C3   | H21C | 2.835    |
| C3   | H47A | 3.380    | C4   | H13A | 3.363    |
| C4   | H13B | 2.706    | C4   | H13C | 2.706    |
| C4   | H14A | 3.357    | C4   | H14B | 2.697    |
| C4   | H14C | 2.697    | C4   | H15A | 3.380    |
| C4   | H15B | 2.738    | C4   | H15C | 2.738    |
| C4   | H21C | 3.491    | C5   | H7   | 3.229    |
| C5   | H9B  | 3.570    | C5   | H10C | 3.520    |
| C5   | H11A | 2.759    | C5   | H11C | 2.812    |
| C5   | H13B | 3.597    | C5   | H14C | 3.410    |
| C5   | H15B | 2.691    | C5   | H15C | 2.792    |
| C6   | H9A  | 2.692    | C6   | H9B  | 2.733    |
| C6   | H9C  | 3.370    | C6   | H10A | 2.668    |
| C6   | H10B | 3.355    | C6   | H10C | 2.702    |
| C6   | H11A | 2.706    | C6   | H11B | 3.369    |
| C6   | H11C | 2.732    | C7   | H1A  | 3.179    |

Table S11-10. Intramolecular contacts less than 3.60 Å involving hydrogens (continued)

| atom | atom | distance | atom | atom | distance |
|------|------|----------|------|------|----------|
| C7   | H1B  | 3.079    | C7   | H5   | 3.225    |
| C7   | H9A  | 2.731    | C7   | H9B  | 3.337    |
| C7   | H10A | 2.715    | C7   | H10C | 3.328    |
| C7   | H26B | 2.714    | C7   | H32  | 3.534    |
| C7   | H47A | 3.402    | C7   | H57  | 3.204    |
| C7   | H59A | 3.441    | C8   | H5   | 2.717    |
| C8   | H7   | 2.651    | C9   | H7   | 2.847    |
| C9   | H10A | 2.708    | C9   | H10B | 2.668    |
| C9   | H10C | 3.353    | C9   | H11A | 3.314    |
| C9   | H11B | 2.633    | C9   | H11C | 2.634    |
| C9   | H59A | 3.478    | C9   | H59B | 3.484    |
| C10  | H7   | 2.880    | C10  | H9A  | 2.701    |
| C10  | H9B  | 3.355    | C10  | H9C  | 2.671    |
| C10  | H11A | 2.672    | C10  | H11B | 2.643    |
| C10  | H11C | 3.333    | C10  | H46B | 3.546    |
| C11  | H5   | 2.492    | C11  | H9A  | 3.309    |
| C11  | H9B  | 2.640    | C11  | H9C  | 2.640    |
| C11  | H10A | 3.326    | C11  | H10B | 2.666    |
| C11  | H10C | 2.666    | C12  | H5   | 2.666    |
| C13  | H14A | 2.708    | C13  | H14B | 2.726    |
| C13  | H14C | 3.376    | C13  | H15A | 2.638    |
| C13  | H15B | 3.329    | C13  | H15C | 2.643    |
| C13  | H21C | 3.371    | C13  | H25A | 3.036    |
| C13  | H25C | 3.028    | C14  | H13A | 2.710    |
| C14  | H13B | 3.375    | C14  | H13C | 2.726    |
| C14  | H15A | 2.664    | C14  | H15B | 2.682    |
| C14  | H15C | 3.346    | C15  | H5   | 2.412    |
| C15  | H13A | 2.630    | C15  | H13B | 2.656    |
| C15  | H13C | 3.327    | C15  | H14A | 2.654    |
| C15  | H14B | 3.345    | C15  | H14C | 2.694    |
| C16  | H1B  | 3.175    | C16  | H13C | 3.470    |
| C16  | H22A | 2.711    | C16  | H22B | 3.266    |
| C16  | H22C | 3.202    | C16  | H25A | 2.658    |
| C16  | H25B | 3.156    | C16  | H25C | 3.248    |
| C17  | H1B  | 3.133    | C17  | H21A | 2.691    |
| C17  | H21B | 3.199    | C17  | H21C | 3.246    |
| C17  | H23A | 2.631    | C17  | H23B | 3.214    |

Table S11-10. Intramolecular contacts less than 3.60 Å involving hydrogens (continued)

| atom | atom | distance | atom | atom | distance |
|------|------|----------|------|------|----------|
| C17  | H23C | 3.158    | C18  | H22A | 3.367    |
| C18  | H22B | 2.837    | C18  | H22C | 2.837    |
| C18  | H24A | 3.356    | C18  | H24B | 2.848    |
| C18  | H24C | 2.848    | C19  | H23A | 3.346    |
| C19  | H23B | 2.847    | C19  | H23C | 2.847    |
| C19  | H25A | 3.368    | C19  | H25B | 2.857    |
| C19  | H25C | 2.857    | C20  | H13C | 3.094    |
| C20  | H21A | 3.378    | C20  | H21B | 2.865    |
| C20  | H21C | 2.865    | C20  | H24A | 2.659    |
| C20  | H24B | 3.184    | C20  | H24C | 3.230    |
| C21  | H1B  | 2.823    | C21  | H13C | 3.576    |
| C21  | H22A | 2.834    | C21  | H25A | 2.733    |
| C21  | H60B | 3.086    | C22  | H1A  | 3.356    |
| C22  | H1B  | 2.757    | C22  | H21A | 2.826    |
| C22  | H23A | 2.648    | C22  | H51A | 3.068    |
| C22  | H63A | 3.467    | C23  | H22B | 3.051    |
| C23  | H22C | 3.074    | C23  | H24B | 3.156    |
| C23  | H24C | 3.151    | C24  | H23B | 3.155    |
| C24  | H23C | 3.150    | C24  | H25B | 3.150    |
| C24  | H25C | 3.120    | C25  | H13A | 3.573    |
| C25  | H13B | 3.471    | C25  | H13C | 2.757    |
| C25  | H21B | 3.120    | C25  | H21C | 3.154    |
| C25  | H24A | 2.733    | C26  | H1A  | 2.486    |
| C26  | H1B  | 3.233    | C26  | H7   | 2.770    |
| C26  | H32  | 2.649    | C26  | H46B | 3.205    |
| C26  | H47A | 3.167    | C26  | H47B | 3.170    |
| C26  | H51A | 2.737    | C26  | H51B | 2.467    |
| C26  | H75A | 3.477    | C26  | H75B | 3.266    |
| C27  | H7   | 3.222    | C27  | H10A | 3.593    |
| C27  | H46B | 3.127    | C27  | H51B | 2.640    |
| C27  | H75A | 2.927    | C27  | H75B | 3.289    |
| C28  | H26A | 2.647    | C28  | H26B | 2.865    |
| C28  | H30  | 3.250    | C28  | H32  | 3.258    |
| C28  | H38A | 2.832    | C28  | H38B | 3.409    |
| C28  | H40A | 2.794    | C28  | H40C | 3.396    |
| C28  | H46B | 2.945    | C28  | H75A | 3.076    |
| C28  | H75B | 3.308    | C28  | H75C | 3.464    |



Table S11-10. Intramolecular contacts less than 3.60 Å involving hydrogens (continued)

| atom | atom | distance | atom | atom | distance |
|------|------|----------|------|------|----------|
| C29  | H38A | 2.675    | C29  | H38B | 2.694    |
| C29  | H38C | 3.352    | C29  | H39A | 2.724    |
| C29  | H39B | 2.765    | C29  | H39C | 3.384    |
| C29  | H40A | 2.683    | C29  | H40B | 3.365    |
| C29  | H40C | 2.741    | C29  | H75A | 3.466    |
| C30  | H32  | 3.221    | C30  | H35A | 2.896    |
| C30  | H35B | 3.509    | C30  | H36A | 2.578    |
| C30  | H36C | 3.212    | C30  | H38B | 3.429    |
| C30  | H39A | 2.697    | C30  | H39B | 2.809    |
| C31  | H34A | 2.625    | C31  | H34B | 2.760    |
| C31  | H34C | 3.335    | C31  | H35A | 2.682    |
| C31  | H35B | 2.712    | C31  | H35C | 3.362    |
| C31  | H36A | 2.635    | C31  | H36B | 3.346    |
| C31  | H36C | 2.773    | C31  | H75A | 3.558    |
| C32  | H7   | 3.130    | C32  | H10A | 3.496    |
| C32  | H26A | 3.213    | C32  | H26B | 3.044    |
| C32  | H30  | 3.216    | C32  | H34A | 2.594    |
| C32  | H34B | 2.988    | C32  | H35B | 3.325    |
| C32  | H51B | 2.759    | C32  | H57  | 3.547    |
| C32  | H75A | 3.184    | C33  | H30  | 2.656    |
| C33  | H32  | 2.708    | C34  | H32  | 2.516    |
| C34  | H35A | 3.258    | C34  | H35B | 2.596    |
| C34  | H35C | 2.596    | C34  | H36A | 3.279    |
| C34  | H36B | 2.652    | C34  | H36C | 2.652    |
| C34  | H59B | 3.406    | C35  | H30  | 3.112    |
| C35  | H34A | 2.640    | C35  | H34B | 3.273    |
| C35  | H34C | 2.504    | C35  | H36A | 2.575    |
| C35  | H36B | 2.470    | C35  | H36C | 3.247    |
| C35  | H71A | 3.413    | C36  | H30  | 2.627    |
| C36  | H34A | 3.284    | C36  | H34B | 2.646    |
| C36  | H34C | 2.646    | C36  | H35A | 2.554    |
| C36  | H35B | 3.234    | C36  | H35C | 2.531    |
| C37  | H30  | 2.674    | C38  | H39A | 2.639    |
| C38  | H39B | 3.320    | C38  | H39C | 2.616    |
| C38  | H40A | 2.747    | C38  | H40B | 2.683    |
| C38  | H40C | 3.373    | C38  | H75C | 3.220    |
| C39  | H30  | 2.426    | C39  | H38A | 3.317    |

Table S11-10. Intramolecular contacts less than 3.60 Å involving hydrogens (continued)

| atom | atom | distance | atom | atom | distance |
|------|------|----------|------|------|----------|
| C39  | H38B | 2.632    | C39  | H38C | 2.633    |
| C39  | H40A | 3.330    | C39  | H40B | 2.657    |
| C39  | H40C | 2.657    | C40  | H38A | 2.741    |
| C40  | H38B | 3.370    | C40  | H38C | 2.697    |
| C40  | H39A | 3.330    | C40  | H39B | 2.657    |
| C40  | H39C | 2.657    | C40  | H46A | 3.513    |
| C40  | H50B | 2.648    | C41  | H26B | 3.527    |
| C41  | H40A | 3.424    | C41  | H47A | 2.696    |
| C41  | H47B | 3.261    | C41  | H47C | 3.174    |
| C41  | H50A | 3.376    | C41  | H50B | 2.872    |
| C41  | H50C | 2.872    | C42  | H26B | 3.280    |
| C42  | H46A | 3.366    | C42  | H46B | 2.860    |
| C42  | H46C | 2.860    | C42  | H48A | 3.367    |
| C42  | H48B | 2.860    | C42  | H48C | 2.860    |
| C43  | H47A | 3.358    | C43  | H47B | 2.835    |
| C43  | H47C | 2.835    | C43  | H49A | 3.353    |
| C43  | H49B | 2.835    | C43  | H49C | 2.835    |
| C44  | H48A | 2.662    | C44  | H48B | 3.181    |
| C44  | H48C | 3.231    | C44  | H50A | 2.651    |
| C44  | H50B | 3.239    | C44  | H50C | 3.167    |
| C45  | H40A | 3.197    | C45  | H46A | 2.675    |
| C45  | H46B | 3.228    | C45  | H46C | 3.194    |
| C45  | H49A | 2.695    | C45  | H49B | 3.213    |
| C45  | H49C | 3.231    | C46  | H10C | 3.493    |
| C46  | H26B | 3.315    | C46  | H40A | 3.380    |
| C46  | H47A | 2.790    | C46  | H50B | 3.163    |
| C46  | H50C | 3.187    | C47  | H1A  | 3.285    |
| C47  | H26A | 3.404    | C47  | H26B | 2.766    |
| C47  | H46B | 3.198    | C47  | H46C | 3.153    |
| C47  | H48B | 3.091    | C47  | H48C | 3.125    |
| C48  | H47B | 3.084    | C48  | H47C | 3.118    |
| C48  | H49B | 3.092    | C48  | H49C | 3.118    |
| C49  | H48A | 2.707    | C49  | H50A | 2.753    |
| C50  | H40A | 2.881    | C50  | H46A | 2.775    |
| C50  | H49A | 2.767    | C51  | H1A  | 2.769    |
| C51  | H1B  | 2.469    | C51  | H22A | 3.099    |
| C51  | H22B | 3.389    | C51  | H26A | 2.500    |

Table S11-10. Intramolecular contacts less than 3.60 Å involving hydrogens (continued)

| atom | atom | distance | atom | atom | distance |
|------|------|----------|------|------|----------|
| C51  | H26B | 3.242    | C51  | H32  | 2.900    |
| C51  | H57  | 2.656    | C51  | H71A | 3.444    |
| C51  | H75A | 3.055    | C51  | H75B | 3.099    |
| C52  | H1B  | 2.676    | C52  | H21A | 3.538    |
| C52  | H22A | 2.741    | C52  | H32  | 3.358    |
| C52  | H71A | 3.540    | C52  | H71C | 3.436    |
| C53  | H22A | 2.820    | C53  | H22C | 3.531    |
| C53  | H51A | 2.661    | C53  | H51B | 2.860    |
| C53  | H55  | 3.249    | C53  | H57  | 3.274    |
| C53  | H63A | 2.807    | C53  | H63B | 3.379    |
| C53  | H65A | 2.857    | C53  | H65C | 3.425    |
| C53  | H71A | 3.560    | C53  | H71C | 2.861    |
| C54  | H22A | 3.433    | C54  | H63A | 2.657    |
| C54  | H63B | 2.684    | C54  | H63C | 3.342    |
| C54  | H64A | 2.734    | C54  | H64B | 3.379    |
| C54  | H64C | 2.729    | C54  | H65A | 2.704    |
| C54  | H65B | 3.375    | C54  | H65C | 2.736    |
| C54  | H71C | 3.390    | C55  | H57  | 3.253    |
| C55  | H60A | 2.675    | C55  | H60B | 3.315    |
| C55  | H61A | 2.686    | C55  | H61C | 3.322    |
| C55  | H63B | 3.430    | C55  | H64A | 2.743    |
| C55  | H64C | 2.690    | C55  | H65C | 3.571    |
| C56  | H21A | 3.429    | C56  | H59A | 2.682    |
| C56  | H59B | 2.733    | C56  | H59C | 3.348    |
| C56  | H60A | 2.614    | C56  | H60B | 2.665    |
| C56  | H60C | 3.321    | C56  | H61A | 2.663    |
| C56  | H61B | 3.355    | C56  | H61C | 2.741    |
| C57  | H1B  | 2.809    | C57  | H21A | 3.217    |
| C57  | H22A | 3.340    | C57  | H32  | 3.192    |
| C57  | H34A | 3.340    | C57  | H51A | 3.221    |
| C57  | H51B | 3.046    | C57  | H55  | 3.244    |
| C57  | H59A | 2.694    | C57  | H59B | 2.838    |
| C57  | H60B | 3.432    | C58  | H55  | 2.659    |
| C58  | H57  | 2.716    | C59  | H9A  | 3.277    |
| C59  | H9B  | 3.386    | C59  | H57  | 2.499    |
| C59  | H60A | 3.309    | C59  | H60B | 2.668    |
| C59  | H60C | 2.668    | C59  | H61A | 3.283    |

Table S11-10. Intramolecular contacts less than 3.60 Å involving hydrogens (continued)

| atom | atom | distance | atom | atom | distance |
|------|------|----------|------|------|----------|
| C59  | H61B | 2.629    | C59  | H61C | 2.629    |
| C60  | H55  | 2.869    | C60  | H59A | 2.670    |
| C60  | H59B | 3.324    | C60  | H59C | 2.630    |
| C60  | H61A | 2.661    | C60  | H61B | 2.644    |
| C60  | H61C | 3.335    | C61  | H55  | 2.802    |
| C61  | H59A | 3.294    | C61  | H59B | 2.616    |
| C61  | H59C | 2.616    | C61  | H60A | 2.671    |
| C61  | H60B | 3.331    | C61  | H60C | 2.644    |
| C62  | H55  | 2.663    | C63  | H22C | 3.298    |
| C63  | H64A | 3.318    | C63  | H64B | 2.643    |
| C63  | H64C | 2.643    | C63  | H65A | 2.740    |
| C63  | H65B | 2.701    | C63  | H65C | 3.368    |
| C64  | H55  | 2.389    | C64  | H63A | 3.318    |
| C64  | H63B | 2.643    | C64  | H63C | 2.643    |
| C64  | H65A | 3.322    | C64  | H65B | 2.645    |
| C64  | H65C | 2.645    | C65  | H63A | 2.739    |
| C65  | H63B | 3.372    | C65  | H63C | 2.691    |
| C65  | H64A | 2.645    | C65  | H64B | 2.634    |
| C65  | H64C | 3.326    | C65  | H71C | 3.184    |
| C65  | H72B | 2.655    | C66  | H51B | 3.445    |
| C66  | H65A | 3.436    | C66  | H72A | 3.359    |
| C66  | H72B | 2.850    | C66  | H72C | 2.850    |
| C66  | H75A | 2.703    | C66  | H75B | 3.269    |
| C66  | H75C | 3.186    | C67  | H65A | 3.181    |
| C67  | H71A | 3.367    | C67  | H71B | 2.852    |
| C67  | H71C | 2.852    | C67  | H73A | 2.712    |
| C67  | H73B | 3.232    | C67  | H73C | 3.245    |
| C68  | H72A | 2.645    | C68  | H72B | 3.227    |
| C68  | H72C | 3.153    | C68  | H74A | 3.343    |
| C68  | H74B | 2.850    | C68  | H74C | 2.850    |
| C69  | H73A | 3.331    | C69  | H73B | 2.809    |
| C69  | H73C | 2.809    | C69  | H75A | 3.356    |
| C69  | H75B | 2.831    | C69  | H75C | 2.831    |
| C70  | H51B | 3.154    | C70  | H71A | 2.686    |
| C70  | H71B | 3.209    | C70  | H71C | 3.240    |
| C70  | H74A | 2.624    | C70  | H74B | 3.219    |
| C70  | H74C | 3.152    | C71  | H35B | 3.201    |

Table S11-10. Intramolecular contacts less than 3.60 Å involving hydrogens (continued)

| atom | atom | distance | atom | atom | distance |
|------|------|----------|------|------|----------|
| C71  | H51B | 3.265    | C71  | H65A | 3.413    |
| C71  | H72B | 3.124    | C71  | H72C | 3.164    |
| C71  | H75A | 2.827    | C72  | H65A | 2.887    |
| C72  | H71B | 3.126    | C72  | H71C | 3.164    |
| C72  | H73A | 2.796    | C73  | H72A | 2.768    |
| C73  | H74B | 3.078    | C73  | H74C | 3.119    |
| C74  | H73B | 3.068    | C74  | H73C | 3.107    |
| C74  | H75B | 3.040    | C74  | H75C | 3.067    |
| C75  | H26A | 3.344    | C75  | H38A | 3.562    |
| C75  | H38B | 3.561    | C75  | H51A | 3.404    |
| C75  | H51B | 2.622    | C75  | H71A | 2.821    |
| C75  | H74A | 2.642    | H1A  | H7   | 3.397    |
| H1A  | H22A | 3.145    | H1A  | H22B | 2.920    |
| H1A  | H26A | 2.470    | H1A  | H26B | 2.481    |
| H1A  | H47A | 3.196    | H1A  | H47B | 2.528    |
| H1A  | H51A | 2.529    | H1A  | H51B | 3.536    |
| H1B  | H7   | 3.234    | H1B  | H21A | 2.191    |
| H1B  | H21C | 2.884    | H1B  | H22A | 2.149    |
| H1B  | H22B | 2.787    | H1B  | H26A | 3.487    |
| H1B  | H26B | 3.428    | H1B  | H51A | 2.491    |
| H1B  | H51B | 3.432    | H1B  | H57  | 2.697    |
| H5   | H11A | 2.236    | H5   | H11B | 3.459    |
| H5   | H11C | 2.295    | H5   | H14C | 3.488    |
| H5   | H15A | 3.375    | H5   | H15B | 2.098    |
| H5   | H15C | 2.286    | H7   | H9A  | 2.270    |
| H7   | H9B  | 3.306    | H7   | H10A | 2.310    |
| H7   | H10C | 3.359    | H7   | H26B | 2.495    |
| H7   | H32  | 2.618    | H7   | H57  | 2.737    |
| H7   | H59A | 3.315    | H9A  | H10A | 2.538    |
| H9A  | H10B | 2.961    | H9A  | H11B | 3.530    |
| H9A  | H11C | 3.530    | H9A  | H32  | 3.363    |
| H9A  | H34B | 2.863    | H9A  | H57  | 3.481    |
| H9A  | H59A | 2.999    | H9A  | H59B | 2.814    |
| H9A  | H59C | 3.531    | H9B  | H10B | 3.561    |
| H9B  | H11A | 3.540    | H9B  | H11B | 2.918    |
| H9B  | H11C | 2.440    | H9B  | H59A | 3.064    |
| H9B  | H59B | 3.295    | H9B  | H59C | 3.235    |

Table S11-10. Intramolecular contacts less than 3.60 Å involving hydrogens (continued)

| atom | atom | distance | atom | atom | distance |
|------|------|----------|------|------|----------|
| H9C  | H10A | 2.975    | H9C  | H10B | 2.462    |
| H9C  | H10C | 3.559    | H9C  | H11A | 3.540    |
| H9C  | H11B | 2.440    | H9C  | H11C | 2.918    |
| H9C  | H34B | 3.573    | H10A | H11A | 3.562    |
| H10A | H11B | 3.540    | H10A | H26B | 3.310    |
| H10A | H32  | 3.465    | H10A | H46B | 3.023    |
| H10B | H11A | 2.966    | H10B | H11B | 2.456    |
| H10B | H11C | 3.557    | H10C | H11A | 2.487    |
| H10C | H11B | 2.923    | H10C | H11C | 3.571    |
| H10C | H46B | 3.161    | H10C | H46C | 3.002    |
| H13A | H14A | 2.520    | H13A | H14B | 3.002    |
| H13A | H14C | 3.600    | H13A | H15A | 2.423    |
| H13A | H15B | 3.534    | H13A | H15C | 2.901    |
| H13A | H25A | 3.311    | H13A | H25C | 2.958    |
| H13B | H14A | 3.598    | H13B | H15A | 2.932    |
| H13B | H15B | 3.556    | H13B | H15C | 2.455    |
| H13B | H21C | 3.048    | H13B | H25A | 2.825    |
| H13B | H25C | 3.284    | H13C | H14A | 2.999    |
| H13C | H14B | 2.557    | H13C | H15A | 3.533    |
| H13C | H15C | 3.549    | H13C | H21C | 2.863    |
| H13C | H25A | 2.524    | H13C | H25C | 2.405    |
| H14A | H15A | 2.451    | H14A | H15B | 2.937    |
| H14A | H15C | 3.552    | H14B | H15A | 3.553    |
| H14B | H15B | 3.586    | H14B | H47C | 3.518    |
| H14C | H15A | 2.969    | H14C | H15B | 2.513    |
| H14C | H15C | 3.591    | H14C | H47C | 3.560    |
| H21A | H22A | 2.174    | H21A | H22B | 3.505    |
| H21A | H22C | 3.434    | H21A | H57  | 3.384    |
| H21A | H59A | 3.599    | H21A | H60B | 2.767    |
| H21B | H22A | 3.431    | H21B | H25A | 2.583    |
| H21B | H25B | 3.484    | H21B | H60B | 2.733    |
| H21C | H22A | 3.520    | H21C | H25A | 2.562    |
| H21C | H60B | 3.269    | H22A | H51A | 2.692    |
| H22A | H63A | 3.400    | H22A | H63B | 3.473    |
| H22B | H23A | 2.428    | H22B | H23B | 3.584    |
| H22B | H51A | 2.581    | H22C | H23A | 2.531    |
| H22C | H23C | 3.437    | H22C | H63A | 2.731    |

Table S11-10. Intramolecular contacts less than 3.60 Å involving hydrogens (continued)

| atom | atom | distance | atom | atom | distance |
|------|------|----------|------|------|----------|
| H22C | H63B | 2.973    | H23B | H24B | 3.255    |
| H23B | H24C | 2.826    | H23C | H24B | 2.826    |
| H23C | H24C | 3.241    | H24A | H25B | 2.624    |
| H24A | H25C | 2.518    | H24B | H25B | 3.527    |
| H26A | H32  | 3.453    | H26A | H46B | 3.574    |
| H26A | H47A | 3.322    | H26A | H47B | 2.882    |
| H26A | H51A | 2.488    | H26A | H51B | 2.508    |
| H26A | H75A | 3.239    | H26A | H75B | 2.599    |
| H26B | H32  | 3.166    | H26B | H46B | 2.524    |
| H26B | H47A | 2.252    | H26B | H47B | 2.609    |
| H26B | H51A | 3.516    | H26B | H51B | 3.429    |
| H30  | H35A | 2.626    | H30  | H36A | 1.987    |
| H30  | H36B | 3.460    | H30  | H36C | 3.003    |
| H30  | H38B | 3.521    | H30  | H39A | 2.131    |
| H30  | H39B | 2.278    | H30  | H39C | 3.391    |
| H32  | H34A | 2.013    | H32  | H34B | 2.588    |
| H32  | H34C | 3.446    | H32  | H35B | 3.355    |
| H32  | H51B | 2.645    | H32  | H57  | 2.648    |
| H34A | H35A | 3.520    | H34A | H35B | 2.451    |
| H34A | H35C | 2.959    | H34A | H36B | 3.540    |
| H34A | H36C | 3.540    | H34A | H57  | 3.013    |
| H34A | H59B | 2.936    | H34B | H35B | 3.529    |
| H34B | H35C | 3.467    | H34B | H36A | 3.531    |
| H34B | H36B | 2.949    | H34B | H36C | 2.477    |
| H34B | H59B | 3.191    | H34C | H35A | 3.416    |
| H34C | H35B | 2.764    | H34C | H35C | 2.307    |
| H34C | H36A | 3.531    | H34C | H36B | 2.477    |
| H34C | H36C | 2.949    | H34C | H59B | 3.565    |
| H35A | H36A | 2.372    | H35A | H36B | 2.745    |
| H35A | H36C | 3.485    | H35A | H71A | 3.576    |
| H35B | H36A | 3.474    | H35B | H36B | 3.380    |
| H35B | H71A | 2.516    | H35B | H71B | 3.148    |
| H35B | H71C | 3.507    | H35C | H36A | 2.861    |
| H35C | H36B | 2.235    | H35C | H36C | 3.420    |
| H36A | H39B | 3.576    | H38A | H39A | 3.537    |
| H38A | H39C | 3.520    | H38A | H40A | 2.598    |
| H38A | H40B | 2.987    | H38A | H75C | 2.826    |

Table S11-10. Intramolecular contacts less than 3.60 Å involving hydrogens (continued)

| atom | atom | distance | atom | atom | distance |
|------|------|----------|------|------|----------|
| H38B | H39A | 2.436    | H38B | H39B | 3.541    |
| H38B | H39C | 2.888    | H38B | H40B | 3.570    |
| H38B | H75A | 3.571    | H38B | H75C | 2.739    |
| H38C | H39A | 2.921    | H38C | H39B | 3.530    |
| H38C | H39C | 2.412    | H38C | H40A | 3.016    |
| H38C | H40B | 2.482    | H38C | H40C | 3.578    |
| H39A | H40B | 3.555    | H39A | H40C | 3.555    |
| H39B | H40A | 3.554    | H39B | H40B | 2.937    |
| H39B | H40C | 2.463    | H39C | H40A | 3.554    |
| H39C | H40B | 2.463    | H39C | H40C | 2.937    |
| H40A | H46A | 2.923    | H40A | H46B | 3.335    |
| H40A | H50A | 3.414    | H40A | H50B | 2.007    |
| H40A | H50C | 3.510    | H40B | H50B | 2.686    |
| H40C | H46A | 3.192    | H40C | H50B | 2.870    |
| H46A | H50B | 2.578    | H46A | H50C | 2.659    |
| H46B | H47A | 2.631    | H46C | H47A | 2.628    |
| H46C | H47C | 3.531    | H46C | H50C | 3.585    |
| H47B | H48B | 3.145    | H47B | H48C | 2.763    |
| H47C | H48B | 2.762    | H47C | H48C | 3.239    |
| H48A | H49B | 2.538    | H48A | H49C | 2.539    |
| H48B | H49B | 3.501    | H49A | H50A | 2.088    |
| H49A | H50B | 3.447    | H49A | H50C | 3.368    |
| H49B | H50A | 3.375    | H49C | H50A | 3.419    |
| H51A | H57  | 3.462    | H51A | H75A | 3.299    |
| H51A | H75B | 2.879    | H51B | H57  | 3.172    |
| H51B | H71A | 2.622    | H51B | H71C | 3.378    |
| H51B | H75A | 2.106    | H51B | H75B | 2.479    |
| H51B | H75C | 3.515    | H55  | H60A | 2.285    |
| H55  | H60B | 3.361    | H55  | H61A | 2.201    |
| H55  | H61B | 3.600    | H55  | H61C | 3.261    |
| H55  | H63B | 3.549    | H55  | H64A | 2.191    |
| H55  | H64B | 3.353    | H55  | H64C | 2.135    |
| H57  | H59A | 2.169    | H57  | H59B | 2.371    |
| H57  | H59C | 3.461    | H57  | H60B | 3.574    |
| H59A | H60A | 3.553    | H59A | H60B | 2.495    |
| H59A | H60C | 2.975    | H59A | H61B | 3.529    |
| H59A | H61C | 3.529    | H59B | H60B | 3.575    |



Table S11-10. Intramolecular contacts less than 3.60 Å involving hydrogens (continued)

| atom | atom | distance | atom | atom | distance |
|------|------|----------|------|------|----------|
| H59B | H60C | 3.556    | H59B | H61A | 3.509    |
| H59B | H61B | 2.909    | H59B | H61C | 2.429    |
| H59C | H60A | 3.524    | H59C | H60B | 2.917    |
| H59C | H60C | 2.453    | H59C | H61A | 3.509    |
| H59C | H61B | 2.429    | H59C | H61C | 2.909    |
| H60A | H61A | 2.481    | H60A | H61B | 2.941    |
| H60A | H61C | 3.572    | H60A | H64C | 3.497    |
| H60B | H61A | 3.563    | H60B | H61B | 3.537    |
| H60C | H61A | 2.925    | H60C | H61B | 2.434    |
| H60C | H61C | 3.543    | H63A | H64B | 3.541    |
| H63A | H64C | 3.541    | H63A | H65A | 2.589    |
| H63A | H65B | 3.010    | H63B | H64A | 3.542    |
| H63B | H64B | 2.924    | H63B | H64C | 2.447    |
| H63B | H65B | 3.585    | H63C | H64A | 3.542    |
| H63C | H64B | 2.447    | H63C | H64C | 2.923    |
| H63C | H65A | 2.997    | H63C | H65B | 2.495    |
| H63C | H65C | 3.577    | H64A | H65A | 3.542    |
| H64A | H65B | 2.927    | H64A | H65C | 2.447    |
| H64B | H65A | 3.534    | H64B | H65B | 2.435    |
| H64B | H65C | 2.911    | H64C | H65B | 3.544    |
| H64C | H65C | 3.549    | H65A | H71C | 2.644    |
| H65A | H72A | 3.390    | H65A | H72B | 2.022    |
| H65A | H72C | 3.545    | H65B | H72B | 2.786    |
| H65C | H71C | 2.908    | H65C | H72B | 2.765    |
| H71A | H75A | 2.167    | H71A | H75B | 3.501    |
| H71A | H75C | 3.427    | H71B | H72B | 3.182    |
| H71B | H72C | 2.815    | H71B | H75A | 3.426    |
| H71C | H72B | 2.814    | H71C | H72C | 3.291    |
| H71C | H75A | 3.511    | H72A | H73A | 2.116    |
| H72A | H73B | 3.390    | H72A | H73C | 3.436    |
| H72B | H73A | 3.474    | H72C | H73A | 3.397    |
| H73B | H74B | 3.128    | H73B | H74C | 2.755    |
| H73C | H74B | 2.753    | H73C | H74C | 3.239    |
| H74A | H75B | 2.412    | H74A | H75C | 2.535    |
| H74B | H75B | 3.586    | H74C | H75C | 3.415    |

Table S11-11. Intermolecular contacts less than 3.60 Å

| atom | atom             | distance  | atom | atom             | distance  |
|------|------------------|-----------|------|------------------|-----------|
| Cl4  | C21 <sup>1</sup> | 3.582(5)  | C21  | Cl4 <sup>2</sup> | 3.582(5)  |
| C24  | C69 <sup>3</sup> | 3.550(7)  | C39  | C63 <sup>4</sup> | 3.477(7)  |
| C60  | C74 <sup>2</sup> | 3.568(10) | C63  | C39 <sup>3</sup> | 3.477(7)  |
| C69  | C24 <sup>4</sup> | 3.550(7)  | C74  | C60 <sup>1</sup> | 3.568(10) |

Symmetry Operators:

- |                             |                           |
|-----------------------------|---------------------------|
| (1) X+1,-Y+1,Z+1            | (2) X,-Y+1,Z              |
| (3) -X+1/2+1,Y+1/2-1,-Z+1/2 | (4) -X+1/2+1,Y+1/2,-Z+1/2 |

Table S11-12. Intermolecular contacts less than 3.60 Å involving hydrogens

| atom | atom               | distance | atom | atom               | distance |
|------|--------------------|----------|------|--------------------|----------|
| Cl2  | H9C <sup>1</sup>   | 3.596    | Cl2  | H11B <sup>1</sup>  | 3.255    |
| Cl3  | H60C <sup>2</sup>  | 2.869    | Cl4  | H13B <sup>2</sup>  | 3.420    |
| Cl4  | H21B <sup>2</sup>  | 3.084    | Cl4  | H21C <sup>2</sup>  | 3.177    |
| Cl4  | H25A <sup>2</sup>  | 3.421    | Cl4  | H60B <sup>2</sup>  | 3.169    |
| Cl5  | H30 <sup>3</sup>   | 3.531    | Cl5  | H36A <sup>3</sup>  | 3.005    |
| Cl5  | H39A <sup>3</sup>  | 3.457    | Cl5  | H39B <sup>3</sup>  | 3.078    |
| Cl5  | H46C <sup>4</sup>  | 3.542    | Cl5  | H50C <sup>4</sup>  | 2.837    |
| Cl6  | H35A <sup>3</sup>  | 3.143    | Cl6  | H35C <sup>3</sup>  | 3.555    |
| Cl6  | H36A <sup>3</sup>  | 3.500    | C4   | H49A <sup>5</sup>  | 3.429    |
| C5   | H49A <sup>5</sup>  | 3.145    | C5   | H49B <sup>5</sup>  | 3.586    |
| C5   | H64B <sup>6</sup>  | 3.179    | C11  | H24A <sup>7</sup>  | 2.949    |
| C11  | H25C <sup>7</sup>  | 3.264    | C11  | H49B <sup>5</sup>  | 3.448    |
| C11  | H73B <sup>8</sup>  | 3.235    | C13  | H50A <sup>5</sup>  | 3.279    |
| C14  | H64A <sup>6</sup>  | 3.453    | C15  | H36C <sup>1</sup>  | 3.231    |
| C15  | H49A <sup>5</sup>  | 3.305    | C15  | H50A <sup>5</sup>  | 3.231    |
| C15  | H64A <sup>6</sup>  | 3.246    | C15  | H64B <sup>6</sup>  | 3.581    |
| C15  | H73B <sup>8</sup>  | 3.522    | C15  | H73C <sup>8</sup>  | 3.389    |
| C23  | H35A <sup>3</sup>  | 3.458    | C23  | H38B <sup>3</sup>  | 3.222    |
| C23  | H71A <sup>3</sup>  | 3.526    | C23  | H71B <sup>3</sup>  | 3.297    |
| C23  | H75A <sup>3</sup>  | 3.527    | C23  | H75C <sup>3</sup>  | 3.338    |
| C24  | H11B <sup>1</sup>  | 3.227    | C24  | H74C <sup>3</sup>  | 3.468    |
| C25  | H11B <sup>1</sup>  | 3.178    | C25  | H38C <sup>5</sup>  | 3.310    |
| C35  | H23A <sup>9</sup>  | 3.569    | C36  | H15A <sup>7</sup>  | 3.163    |
| C36  | H50C <sup>10</sup> | 3.426    | C36  | H73C <sup>9</sup>  | 3.232    |
| C38  | H23C <sup>9</sup>  | 3.373    | C39  | H46A <sup>10</sup> | 3.417    |
| C39  | H63A <sup>9</sup>  | 3.177    | C39  | H63B <sup>9</sup>  | 3.553    |
| C39  | H63C <sup>9</sup>  | 3.144    | C42  | H72A <sup>6</sup>  | 3.574    |
| C43  | H72A <sup>6</sup>  | 3.094    | C44  | H72A <sup>6</sup>  | 3.161    |
| C44  | H73A <sup>6</sup>  | 3.051    | C45  | H73A <sup>6</sup>  | 3.402    |
| C46  | H39B <sup>10</sup> | 3.221    | C47  | H65B <sup>6</sup>  | 3.428    |
| C48  | H72A <sup>6</sup>  | 3.406    | C49  | H5 <sup>2</sup>    | 3.500    |
| C49  | H9B <sup>2</sup>   | 3.343    | C49  | H11C <sup>2</sup>  | 3.320    |
| C49  | H15C <sup>2</sup>  | 3.314    | C49  | H72A <sup>6</sup>  | 3.574    |
| C49  | H73A <sup>6</sup>  | 2.848    | C50  | H13B <sup>2</sup>  | 3.355    |
| C50  | H15C <sup>2</sup>  | 3.324    | C50  | H36C <sup>10</sup> | 3.507    |
| C50  | H73A <sup>6</sup>  | 3.543    | C60  | H74A <sup>5</sup>  | 3.118    |
| C60  | H74B <sup>5</sup>  | 3.499    | C60  | H74C <sup>5</sup>  | 3.515    |

Table S11-12. Intermolecular contacts less than 3.60 Å involving hydrogens (continued)

| atom | atom               | distance | atom | atom               | distance |
|------|--------------------|----------|------|--------------------|----------|
| C61  | H34C <sup>11</sup> | 3.452    | C61  | H35C <sup>11</sup> | 3.385    |
| C63  | H39A <sup>3</sup>  | 3.385    | C63  | H39C <sup>3</sup>  | 2.897    |
| C64  | H5 <sup>4</sup>    | 3.538    | C64  | H11A <sup>4</sup>  | 3.436    |
| C64  | H14C <sup>4</sup>  | 3.223    | C64  | H15B <sup>4</sup>  | 2.865    |
| C65  | H14C <sup>4</sup>  | 3.320    | C66  | H23B <sup>9</sup>  | 3.177    |
| C66  | H24C <sup>9</sup>  | 3.247    | C67  | H24C <sup>9</sup>  | 3.040    |
| C68  | H24B <sup>9</sup>  | 3.451    | C68  | H24C <sup>9</sup>  | 3.020    |
| C69  | H24B <sup>9</sup>  | 3.026    | C69  | H24C <sup>9</sup>  | 3.227    |
| C70  | H23B <sup>9</sup>  | 3.539    | C70  | H23C <sup>9</sup>  | 3.400    |
| C70  | H24B <sup>9</sup>  | 3.227    | C70  | H24C <sup>9</sup>  | 3.355    |
| C71  | H23B <sup>9</sup>  | 2.911    | C72  | H48B <sup>4</sup>  | 3.474    |
| C73  | H11C <sup>12</sup> | 3.293    | C73  | H15C <sup>12</sup> | 3.169    |
| C73  | H49A <sup>4</sup>  | 3.512    | C73  | H49B <sup>4</sup>  | 3.177    |
| C74  | H24B <sup>9</sup>  | 3.251    | C74  | H60A <sup>2</sup>  | 2.873    |
| C74  | H60C <sup>2</sup>  | 3.392    | C75  | H23C <sup>9</sup>  | 2.972    |
| H5   | C49 <sup>5</sup>   | 3.500    | H5   | C64 <sup>6</sup>   | 3.538    |
| H5   | H49A <sup>5</sup>  | 2.953    | H5   | H49B <sup>5</sup>  | 3.261    |
| H5   | H64B <sup>6</sup>  | 2.819    | H5   | H73B <sup>8</sup>  | 3.072    |
| H9B  | C49 <sup>5</sup>   | 3.343    | H9B  | H48A <sup>5</sup>  | 3.374    |
| H9B  | H49B <sup>5</sup>  | 2.830    | H9B  | H49C <sup>5</sup>  | 2.991    |
| H9C  | Cl <sup>7</sup>    | 3.596    | H9C  | H13A <sup>7</sup>  | 2.878    |
| H9C  | H14A <sup>7</sup>  | 3.245    | H9C  | H25C <sup>7</sup>  | 3.560    |
| H10B | H13A <sup>7</sup>  | 3.046    | H10B | H25C <sup>7</sup>  | 2.868    |
| H10B | H40B <sup>10</sup> | 3.232    | H10C | H40B <sup>10</sup> | 3.570    |
| H10C | H63C <sup>6</sup>  | 3.187    | H10C | H64B <sup>6</sup>  | 3.464    |
| H11A | C64 <sup>6</sup>   | 3.436    | H11A | H24A <sup>7</sup>  | 2.930    |
| H11A | H25C <sup>7</sup>  | 3.525    | H11A | H64B <sup>6</sup>  | 2.793    |
| H11A | H64C <sup>6</sup>  | 3.187    | H11A | H73B <sup>8</sup>  | 3.060    |
| H11B | Cl <sup>7</sup>    | 3.255    | H11B | C24 <sup>7</sup>   | 3.227    |
| H11B | C25 <sup>7</sup>   | 3.178    | H11B | H24A <sup>7</sup>  | 2.351    |
| H11B | H24C <sup>7</sup>  | 3.376    | H11B | H25B <sup>7</sup>  | 3.265    |
| H11B | H25C <sup>7</sup>  | 2.339    | H11C | C49 <sup>5</sup>   | 3.320    |
| H11C | C73 <sup>8</sup>   | 3.293    | H11C | H24A <sup>7</sup>  | 3.120    |
| H11C | H49A <sup>5</sup>  | 3.397    | H11C | H49B <sup>5</sup>  | 2.520    |
| H11C | H73A <sup>8</sup>  | 3.130    | H11C | H73B <sup>8</sup>  | 2.598    |
| H13A | H9C <sup>1</sup>   | 2.878    | H13A | H10B <sup>1</sup>  | 3.046    |
| H13A | H50A <sup>5</sup>  | 3.357    | H13B | Cl <sup>4</sup>    | 3.420    |

Table S11-12. Intermolecular contacts less than 3.60 Å involving hydrogens (continued)

| atom | atom              | distance | atom | atom              | distance |
|------|-------------------|----------|------|-------------------|----------|
| H13B | C50 <sup>5</sup>  | 3.355    | H13B | H49A <sup>5</sup> | 2.838    |
| H13B | H50A <sup>5</sup> | 2.506    | H13B | H50B <sup>5</sup> | 3.399    |
| H14A | H9C <sup>1</sup>  | 3.245    | H14C | C64 <sup>6</sup>  | 3.223    |
| H14C | C65 <sup>6</sup>  | 3.320    | H14C | H64A <sup>6</sup> | 2.666    |
| H14C | H64B <sup>6</sup> | 2.963    | H14C | H65B <sup>6</sup> | 3.080    |
| H14C | H65C <sup>6</sup> | 2.774    | H15A | C36 <sup>1</sup>  | 3.163    |
| H15A | H34B <sup>1</sup> | 3.332    | H15A | H36B <sup>1</sup> | 3.005    |
| H15A | H36C <sup>1</sup> | 2.467    | H15A | H50A <sup>5</sup> | 3.332    |
| H15A | H64A <sup>6</sup> | 3.454    | H15A | H73C <sup>8</sup> | 3.483    |
| H15B | C64 <sup>6</sup>  | 2.865    | H15B | H64A <sup>6</sup> | 2.374    |
| H15B | H64B <sup>6</sup> | 2.678    | H15B | H64C <sup>6</sup> | 3.107    |
| H15B | H73B <sup>8</sup> | 3.163    | H15B | H73C <sup>8</sup> | 3.354    |
| H15C | C49 <sup>5</sup>  | 3.314    | H15C | C50 <sup>5</sup>  | 3.324    |
| H15C | C73 <sup>8</sup>  | 3.169    | H15C | H36C <sup>1</sup> | 3.170    |
| H15C | H49A <sup>5</sup> | 2.413    | H15C | H49B <sup>5</sup> | 3.467    |
| H15C | H50A <sup>5</sup> | 2.428    | H15C | H50C <sup>5</sup> | 3.463    |
| H15C | H73A <sup>8</sup> | 3.163    | H15C | H73B <sup>8</sup> | 3.005    |
| H15C | H73C <sup>8</sup> | 2.810    | H21B | Cl4 <sup>5</sup>  | 3.084    |
| H21C | Cl4 <sup>5</sup>  | 3.177    | H22C | H39A <sup>3</sup> | 2.875    |
| H23A | C35 <sup>3</sup>  | 3.569    | H23A | H35A <sup>3</sup> | 2.729    |
| H23A | H35B <sup>3</sup> | 3.581    | H23A | H38B <sup>3</sup> | 3.336    |
| H23A | H39A <sup>3</sup> | 3.307    | H23B | C66 <sup>3</sup>  | 3.177    |
| H23B | C70 <sup>3</sup>  | 3.539    | H23B | C71 <sup>3</sup>  | 2.911    |
| H23B | H35A <sup>3</sup> | 3.484    | H23B | H71A <sup>3</sup> | 2.892    |
| H23B | H71B <sup>3</sup> | 2.375    | H23B | H75A <sup>3</sup> | 3.403    |
| H23B | H75C <sup>3</sup> | 3.478    | H23C | C38 <sup>3</sup>  | 3.373    |
| H23C | C70 <sup>3</sup>  | 3.400    | H23C | C75 <sup>3</sup>  | 2.972    |
| H23C | H38B <sup>3</sup> | 2.419    | H23C | H39A <sup>3</sup> | 3.556    |
| H23C | H71A <sup>3</sup> | 3.410    | H23C | H71B <sup>3</sup> | 3.563    |
| H23C | H75A <sup>3</sup> | 2.840    | H23C | H75C <sup>3</sup> | 2.438    |
| H24A | C11 <sup>1</sup>  | 2.949    | H24A | H11A <sup>1</sup> | 2.930    |
| H24A | H11B <sup>1</sup> | 2.351    | H24A | H11C <sup>1</sup> | 3.120    |
| H24A | H73B <sup>3</sup> | 3.390    | H24A | H74C <sup>3</sup> | 3.491    |
| H24B | C68 <sup>3</sup>  | 3.451    | H24B | C69 <sup>3</sup>  | 3.026    |
| H24B | C70 <sup>3</sup>  | 3.227    | H24B | C74 <sup>3</sup>  | 3.251    |
| H24B | H74A <sup>3</sup> | 3.466    | H24B | H74C <sup>3</sup> | 2.769    |
| H24B | H75C <sup>3</sup> | 3.019    | H24C | C66 <sup>3</sup>  | 3.247    |

Table S11-12. Intermolecular contacts less than 3.60 Å involving hydrogens (continued)

| atom | atom               | distance | atom | atom               | distance |
|------|--------------------|----------|------|--------------------|----------|
| H24C | C67 <sup>3</sup>   | 3.040    | H24C | C68 <sup>3</sup>   | 3.020    |
| H24C | C69 <sup>3</sup>   | 3.227    | H24C | C70 <sup>3</sup>   | 3.355    |
| H24C | H11B <sup>1</sup>  | 3.376    | H24C | H72C <sup>3</sup>  | 3.287    |
| H24C | H73B <sup>3</sup>  | 3.400    | H25A | Cl4 <sup>5</sup>   | 3.421    |
| H25A | H38C <sup>5</sup>  | 2.909    | H25A | H40B <sup>5</sup>  | 3.520    |
| H25B | H11B <sup>1</sup>  | 3.265    | H25B | H38C <sup>5</sup>  | 2.813    |
| H25C | C11 <sup>1</sup>   | 3.264    | H25C | H9C <sup>1</sup>   | 3.560    |
| H25C | H10B <sup>1</sup>  | 2.868    | H25C | H11A <sup>1</sup>  | 3.525    |
| H25C | H11B <sup>1</sup>  | 2.339    | H30  | Cl5 <sup>9</sup>   | 3.531    |
| H30  | H50C <sup>10</sup> | 3.548    | H34B | H15A <sup>7</sup>  | 3.332    |
| H34C | C61 <sup>11</sup>  | 3.452    | H34C | H61A <sup>11</sup> | 3.060    |
| H34C | H61B <sup>11</sup> | 3.383    | H34C | H61C <sup>11</sup> | 3.346    |
| H35A | Cl6 <sup>9</sup>   | 3.143    | H35A | C23 <sup>9</sup>   | 3.458    |
| H35A | H23A <sup>9</sup>  | 2.729    | H35A | H23B <sup>9</sup>  | 3.484    |
| H35B | H23A <sup>9</sup>  | 3.581    | H35C | Cl6 <sup>9</sup>   | 3.555    |
| H35C | C61 <sup>11</sup>  | 3.385    | H35C | H61A <sup>11</sup> | 3.245    |
| H35C | H61B <sup>11</sup> | 2.730    | H36A | Cl5 <sup>9</sup>   | 3.005    |
| H36A | Cl6 <sup>9</sup>   | 3.500    | H36A | H50C <sup>10</sup> | 3.027    |
| H36A | H73C <sup>9</sup>  | 3.060    | H36B | H15A <sup>7</sup>  | 3.005    |
| H36B | H61A <sup>11</sup> | 3.483    | H36B | H73C <sup>9</sup>  | 2.882    |
| H36B | H74B <sup>9</sup>  | 2.973    | H36C | C15 <sup>7</sup>   | 3.231    |
| H36C | C50 <sup>10</sup>  | 3.507    | H36C | H15A <sup>7</sup>  | 2.467    |
| H36C | H15C <sup>7</sup>  | 3.170    | H36C | H50A <sup>10</sup> | 3.301    |
| H36C | H50C <sup>10</sup> | 2.927    | H36C | H73C <sup>9</sup>  | 3.216    |
| H38B | C23 <sup>9</sup>   | 3.222    | H38B | H23A <sup>9</sup>  | 3.336    |
| H38B | H23C <sup>9</sup>  | 2.419    | H38C | C25 <sup>2</sup>   | 3.310    |
| H38C | H25A <sup>2</sup>  | 2.909    | H38C | H25B <sup>2</sup>  | 2.813    |
| H39A | Cl5 <sup>9</sup>   | 3.457    | H39A | C63 <sup>9</sup>   | 3.385    |
| H39A | H22C <sup>9</sup>  | 2.875    | H39A | H23A <sup>9</sup>  | 3.307    |
| H39A | H23C <sup>9</sup>  | 3.556    | H39A | H63A <sup>9</sup>  | 2.883    |
| H39A | H63B <sup>9</sup>  | 3.405    | H39A | H63C <sup>9</sup>  | 3.329    |
| H39B | Cl5 <sup>9</sup>   | 3.078    | H39B | C46 <sup>10</sup>  | 3.221    |
| H39B | H46A <sup>10</sup> | 2.574    | H39B | H46C <sup>10</sup> | 2.992    |
| H39B | H50C <sup>10</sup> | 3.275    | H39B | H63A <sup>9</sup>  | 3.264    |
| H39B | H63C <sup>9</sup>  | 3.174    | H39C | C63 <sup>9</sup>   | 2.897    |
| H39C | H46A <sup>10</sup> | 3.522    | H39C | H46C <sup>10</sup> | 3.398    |
| H39C | H63A <sup>9</sup>  | 2.866    | H39C | H63B <sup>9</sup>  | 2.872    |

Table S11-12. Intermolecular contacts less than 3.60 Å involving hydrogens (continued)

| atom | atom               | distance | atom | atom               | distance |
|------|--------------------|----------|------|--------------------|----------|
| H39C | H63C <sup>9</sup>  | 2.474    | H40B | H10B <sup>10</sup> | 3.232    |
| H40B | H10C <sup>10</sup> | 3.570    | H40B | H25A <sup>2</sup>  | 3.520    |
| H40C | H40C <sup>10</sup> | 2.976    | H40C | H46A <sup>10</sup> | 2.851    |
| H46A | C39 <sup>10</sup>  | 3.417    | H46A | H39B <sup>10</sup> | 2.574    |
| H46A | H39C <sup>10</sup> | 3.522    | H46A | H40C <sup>10</sup> | 2.851    |
| H46C | C15 <sup>6</sup>   | 3.542    | H46C | H39B <sup>10</sup> | 2.992    |
| H46C | H39C <sup>10</sup> | 3.398    | H46C | H63C <sup>6</sup>  | 2.779    |
| H46C | H65B <sup>6</sup>  | 3.055    | H47A | H65B <sup>6</sup>  | 3.205    |
| H47C | H65B <sup>6</sup>  | 2.912    | H47C | H72B <sup>6</sup>  | 3.468    |
| H48A | H9B <sup>2</sup>   | 3.374    | H48A | H59C <sup>2</sup>  | 3.221    |
| H48A | H72A <sup>6</sup>  | 3.551    | H48B | C72 <sup>6</sup>   | 3.474    |
| H48B | H72A <sup>6</sup>  | 3.006    | H48B | H72B <sup>6</sup>  | 3.597    |
| H48B | H72C <sup>6</sup>  | 3.276    | H49A | C4 <sup>2</sup>    | 3.429    |
| H49A | C5 <sup>2</sup>    | 3.145    | H49A | C15 <sup>2</sup>   | 3.305    |
| H49A | C73 <sup>6</sup>   | 3.512    | H49A | H5 <sup>2</sup>    | 2.953    |
| H49A | H11C <sup>2</sup>  | 3.397    | H49A | H13B <sup>2</sup>  | 2.838    |
| H49A | H15C <sup>2</sup>  | 2.413    | H49A | H73A <sup>6</sup>  | 2.829    |
| H49A | H73B <sup>6</sup>  | 3.570    | H49B | C5 <sup>2</sup>    | 3.586    |
| H49B | C11 <sup>2</sup>   | 3.448    | H49B | C73 <sup>6</sup>   | 3.177    |
| H49B | H5 <sup>2</sup>    | 3.261    | H49B | H9B <sup>2</sup>   | 2.830    |
| H49B | H11C <sup>2</sup>  | 2.520    | H49B | H15C <sup>2</sup>  | 3.467    |
| H49B | H72A <sup>6</sup>  | 3.025    | H49B | H73A <sup>6</sup>  | 2.357    |
| H49B | H73B <sup>6</sup>  | 3.189    | H49C | H9B <sup>2</sup>   | 2.991    |
| H49C | H59A <sup>2</sup>  | 3.088    | H49C | H59C <sup>2</sup>  | 3.233    |
| H50A | C13 <sup>2</sup>   | 3.279    | H50A | C15 <sup>2</sup>   | 3.231    |
| H50A | H13A <sup>2</sup>  | 3.357    | H50A | H13B <sup>2</sup>  | 2.506    |
| H50A | H15A <sup>2</sup>  | 3.332    | H50A | H15C <sup>2</sup>  | 2.428    |
| H50A | H36C <sup>10</sup> | 3.301    | H50A | H73A <sup>6</sup>  | 3.305    |
| H50A | H73C <sup>6</sup>  | 3.406    | H50B | H13B <sup>2</sup>  | 3.399    |
| H50C | C15 <sup>6</sup>   | 2.837    | H50C | C36 <sup>10</sup>  | 3.426    |
| H50C | H15C <sup>2</sup>  | 3.463    | H50C | H30 <sup>10</sup>  | 3.548    |
| H50C | H36A <sup>10</sup> | 3.027    | H50C | H36C <sup>10</sup> | 2.927    |
| H50C | H39B <sup>10</sup> | 3.275    | H50C | H73A <sup>6</sup>  | 3.358    |
| H50C | H73C <sup>6</sup>  | 3.198    | H59A | H49C <sup>5</sup>  | 3.088    |
| H59C | H48A <sup>5</sup>  | 3.221    | H59C | H49C <sup>5</sup>  | 3.233    |
| H60A | C74 <sup>5</sup>   | 2.873    | H60A | H74A <sup>5</sup>  | 2.631    |
| H60A | H74B <sup>5</sup>  | 2.841    | H60A | H74C <sup>5</sup>  | 2.659    |

Table S11-12. Intermolecular contacts less than 3.60 Å involving hydrogens (continued)

| atom | atom               | distance | atom | atom               | distance |
|------|--------------------|----------|------|--------------------|----------|
| H60B | Cl4 <sup>5</sup>   | 3.169    | H60B | H74A <sup>5</sup>  | 3.497    |
| H60C | Cl3 <sup>5</sup>   | 2.869    | H60C | C74 <sup>5</sup>   | 3.392    |
| H60C | H74A <sup>5</sup>  | 2.804    | H60C | H74B <sup>5</sup>  | 3.268    |
| H61A | H34C <sup>11</sup> | 3.060    | H61A | H35C <sup>11</sup> | 3.245    |
| H61A | H36B <sup>11</sup> | 3.483    | H61A | H74B <sup>5</sup>  | 3.505    |
| H61B | H34C <sup>11</sup> | 3.383    | H61B | H35C <sup>11</sup> | 2.730    |
| H61C | H34C <sup>11</sup> | 3.346    | H63A | C39 <sup>3</sup>   | 3.177    |
| H63A | H39A <sup>3</sup>  | 2.883    | H63A | H39B <sup>3</sup>  | 3.264    |
| H63A | H39C <sup>3</sup>  | 2.866    | H63B | C39 <sup>3</sup>   | 3.553    |
| H63B | H39A <sup>3</sup>  | 3.405    | H63B | H39C <sup>3</sup>  | 2.872    |
| H63C | C39 <sup>3</sup>   | 3.144    | H63C | H10C <sup>4</sup>  | 3.187    |
| H63C | H39A <sup>3</sup>  | 3.329    | H63C | H39B <sup>3</sup>  | 3.174    |
| H63C | H39C <sup>3</sup>  | 2.474    | H63C | H46C <sup>4</sup>  | 2.779    |
| H64A | C14 <sup>4</sup>   | 3.453    | H64A | C15 <sup>4</sup>   | 3.246    |
| H64A | H14C <sup>4</sup>  | 2.666    | H64A | H15A <sup>4</sup>  | 3.454    |
| H64A | H15B <sup>4</sup>  | 2.374    | H64B | C5 <sup>4</sup>    | 3.179    |
| H64B | C15 <sup>4</sup>   | 3.581    | H64B | H5 <sup>4</sup>    | 2.819    |
| H64B | H10C <sup>4</sup>  | 3.464    | H64B | H11A <sup>4</sup>  | 2.793    |
| H64B | H14C <sup>4</sup>  | 2.963    | H64B | H15B <sup>4</sup>  | 2.678    |
| H64C | H11A <sup>4</sup>  | 3.187    | H64C | H15B <sup>4</sup>  | 3.107    |
| H64C | H74C <sup>5</sup>  | 3.331    | H65B | C47 <sup>4</sup>   | 3.428    |
| H65B | H14C <sup>4</sup>  | 3.080    | H65B | H46C <sup>4</sup>  | 3.055    |
| H65B | H47A <sup>4</sup>  | 3.205    | H65B | H47C <sup>4</sup>  | 2.912    |
| H65C | H14C <sup>4</sup>  | 2.774    | H71A | C23 <sup>9</sup>   | 3.526    |
| H71A | H23B <sup>9</sup>  | 2.892    | H71A | H23C <sup>9</sup>  | 3.410    |
| H71B | C23 <sup>9</sup>   | 3.297    | H71B | H23B <sup>9</sup>  | 2.375    |
| H71B | H23C <sup>9</sup>  | 3.563    | H72A | C42 <sup>4</sup>   | 3.574    |
| H72A | C43 <sup>4</sup>   | 3.094    | H72A | C44 <sup>4</sup>   | 3.161    |
| H72A | C48 <sup>4</sup>   | 3.406    | H72A | C49 <sup>4</sup>   | 3.574    |
| H72A | H48A <sup>4</sup>  | 3.551    | H72A | H48B <sup>4</sup>  | 3.006    |
| H72A | H49B <sup>4</sup>  | 3.025    | H72B | H47C <sup>4</sup>  | 3.468    |
| H72B | H48B <sup>4</sup>  | 3.597    | H72C | H24C <sup>9</sup>  | 3.287    |
| H72C | H48B <sup>4</sup>  | 3.276    | H73A | C44 <sup>4</sup>   | 3.051    |
| H73A | C45 <sup>4</sup>   | 3.402    | H73A | C49 <sup>4</sup>   | 2.848    |
| H73A | C50 <sup>4</sup>   | 3.543    | H73A | H11C <sup>12</sup> | 3.130    |
| H73A | H15C <sup>12</sup> | 3.163    | H73A | H49A <sup>4</sup>  | 2.829    |
| H73A | H49B <sup>4</sup>  | 2.357    | H73A | H50A <sup>4</sup>  | 3.305    |



Table S11-12. Intermolecular contacts less than 3.60 Å involving hydrogens (continued)

| atom | atom               | distance | atom | atom               | distance |
|------|--------------------|----------|------|--------------------|----------|
| H73A | H50C <sup>4</sup>  | 3.358    | H73B | C11 <sup>12</sup>  | 3.235    |
| H73B | C15 <sup>12</sup>  | 3.522    | H73B | H5 <sup>12</sup>   | 3.072    |
| H73B | H11A <sup>12</sup> | 3.060    | H73B | H11C <sup>12</sup> | 2.598    |
| H73B | H15B <sup>12</sup> | 3.163    | H73B | H15C <sup>12</sup> | 3.005    |
| H73B | H24A <sup>9</sup>  | 3.390    | H73B | H24C <sup>9</sup>  | 3.400    |
| H73B | H49A <sup>4</sup>  | 3.570    | H73B | H49B <sup>4</sup>  | 3.189    |
| H73C | C15 <sup>12</sup>  | 3.389    | H73C | C36 <sup>3</sup>   | 3.232    |
| H73C | H15A <sup>12</sup> | 3.483    | H73C | H15B <sup>12</sup> | 3.354    |
| H73C | H15C <sup>12</sup> | 2.810    | H73C | H36A <sup>3</sup>  | 3.060    |
| H73C | H36B <sup>3</sup>  | 2.882    | H73C | H36C <sup>3</sup>  | 3.216    |
| H73C | H50A <sup>4</sup>  | 3.406    | H73C | H50C <sup>4</sup>  | 3.198    |
| H74A | C60 <sup>2</sup>   | 3.118    | H74A | H24B <sup>9</sup>  | 3.466    |
| H74A | H60A <sup>2</sup>  | 2.631    | H74A | H60B <sup>2</sup>  | 3.497    |
| H74A | H60C <sup>2</sup>  | 2.804    | H74B | C60 <sup>2</sup>   | 3.499    |
| H74B | H36B <sup>3</sup>  | 2.973    | H74B | H60A <sup>2</sup>  | 2.841    |
| H74B | H60C <sup>2</sup>  | 3.268    | H74B | H61A <sup>2</sup>  | 3.505    |
| H74C | C24 <sup>9</sup>   | 3.468    | H74C | C60 <sup>2</sup>   | 3.515    |
| H74C | H24A <sup>9</sup>  | 3.491    | H74C | H24B <sup>9</sup>  | 2.769    |
| H74C | H60A <sup>2</sup>  | 2.659    | H74C | H64C <sup>2</sup>  | 3.331    |
| H75A | C23 <sup>9</sup>   | 3.527    | H75A | H23B <sup>9</sup>  | 3.403    |
| H75A | H23C <sup>9</sup>  | 2.840    | H75C | C23 <sup>9</sup>   | 3.338    |
| H75C | H23B <sup>9</sup>  | 3.478    | H75C | H23C <sup>9</sup>  | 2.438    |
| H75C | H24B <sup>9</sup>  | 3.019    |      |                    |          |

Symmetry Operators:

- |                                 |                         |
|---------------------------------|-------------------------|
| (1) $-X+1/2, Y+1/2-1, -Z+1/2$   | (2) $X+1, -Y+1, Z+1$    |
| (3) $-X+1/2+1, Y+1/2-1, -Z+1/2$ | (4) $X+1, -Y+1, Z$      |
| (5) $X, -Y+1, Z$                | (6) $X, -Y+1, Z+1$      |
| (7) $-X+1/2, Y+1/2, -Z+1/2$     | (8) $X-1, Y, Z$         |
| (9) $-X+1/2+1, Y+1/2, -Z+1/2$   | (10) $-X+1, -Y+1, -Z+1$ |
| (11) $-X+1, -Y+1, -Z$           | (12) $X+1, Y, Z$        |

X-ray Structure Report

for

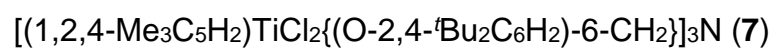

February 17, 2016

## Experimental

### Data Collection

A red plate crystal of  $C_{69}H_{99}Cl_6NO_3Ti_3$  having approximate dimensions of 0.330 x 0.130 x 0.050 mm was mounted on a glass fiber. All measurements were made on a Rigaku XtaLAB mini diffractometer using multi-layer mirror monochromated Mo-K $\alpha$  radiation.

The crystal-to-detector distance was 50.00 mm.

Cell constants and an orientation matrix for data collection corresponded to a primitive monoclinic cell with dimensions:

$$\begin{aligned} a &= 13.2258(6) \text{ \AA} \\ b &= 22.4804(11) \text{ \AA} & \beta &= 99.642(4)^\circ \\ c &= 24.4338(12) \text{ \AA} \\ V &= 7162.1(6) \text{ \AA}^3 \end{aligned}$$

For  $Z = 4$  and F.W. = 1346.96, the calculated density is 1.249 g/cm<sup>3</sup>. The reflection conditions of:

$$\begin{aligned} h0l: & h+l = 2n \\ 0k0: & k = 2n \end{aligned}$$

uniquely determine the space group to be:

$$P2_1/n \text{ (#14)}$$

The data were collected at a temperature of  $-180 \pm 1^\circ\text{C}$  to a maximum  $2\theta$  value of  $65.2^\circ$ . A total of 540 oscillation images were collected. A sweep of data was done using  $\omega$  scans from  $-60.0$  to  $120.0^\circ$  in  $1.00^\circ$  step, at  $\chi=54.0^\circ$  and  $\phi = 0.0^\circ$ . The exposure rate was 16.0 [sec./ $^\circ$ ]. The detector swing angle was  $30.00^\circ$ . A second sweep was performed using  $\omega$  scans from  $-60.0$  to  $120.0^\circ$  in  $1.00^\circ$  step, at  $\chi=54.0^\circ$  and  $\phi = 120.0^\circ$ . The exposure rate was 16.0 [sec./ $^\circ$ ]. The detector swing angle was  $30.00^\circ$ . Another sweep was performed using  $\omega$  scans from  $-60.0$  to  $120.0^\circ$  in  $1.00^\circ$  step, at  $\chi=54.0^\circ$  and  $\phi = 240.0^\circ$ . The exposure rate was 16.0 [sec./ $^\circ$ ]. The detector swing angle

was 30.00°. The crystal-to-detector distance was 50.00 mm. Readout was performed in the 0.073 mm pixel mode.

### Data Reduction

Of the 0 reflections were collected, where 0 were unique ( $R_{\text{int}} = 0.1157$ ); equivalent reflections were merged. Data were collected and processed using CrysAlisPro (Rigaku Oxford Diffraction).<sup>1</sup>

The linear absorption coefficient,  $\mu$ , for Mo-K $\alpha$  radiation is 5.929 cm<sup>-1</sup>. An empirical absorption correction was applied which resulted in transmission factors ranging from 0.936 to 0.971. The data were corrected for Lorentz and polarization effects.

### Structure Solution and Refinement

The structure was solved by direct methods<sup>2</sup> and expanded using Fourier techniques. The non-hydrogen atoms were refined anisotropically. Hydrogen atoms were refined using the riding model. The final cycle of full-matrix least-squares refinement<sup>3</sup> on  $F^2$  was based on 16446 observed reflections and 739 variable parameters and converged (largest parameter shift was 0.00 times its esd) with unweighted and weighted agreement factors of:

$$R1 = \sum ||F_o| - |F_c|| / \sum |F_o| = 0.0571$$

$$wR2 = [ \sum ( w (F_o^2 - F_c^2)^2 ) / \sum w(F_o^2)^2 ]^{1/2} = 0.1330$$

The goodness of fit<sup>4</sup> was 1.01. Unit weights were used. The maximum and minimum peaks on the final difference Fourier map corresponded to 0.47 and -0.59 e<sup>-</sup>/Å<sup>3</sup>, respectively.

Neutral atom scattering factors were taken from International Tables for Crystallography (IT), Vol. C, Table 6.1.1.4<sup>5</sup>. Anomalous dispersion effects were included in  $F_{\text{calc}}$ <sup>6</sup>; the values for  $\Delta f'$  and  $\Delta f''$  were those of Creagh and McAuley<sup>7</sup>. The values for the mass attenuation coefficients are those of Creagh and Hubbell<sup>8</sup>. All calculations were performed using the CrystalStructure<sup>9</sup> crystallographic software package except for refinement, which was performed using SHELXL Version 2014/7<sup>10</sup>.

## References

(1) CrysAlisPro: Data Collection and Processing Software, Rigaku Corporation (2015). Tokyo 196-8666, Japan.

(2) SHELXT: Sheldrick, G. M. (2014). Acta Cryst. A70, C1437.

(3) Least Squares function minimized: (SHELXL Version 2014/7)

$$\sum w(F_o^2 - F_c^2)^2 \quad \text{where } w = \text{Least Squares weights.}$$

(4) Goodness of fit is defined as:

$$[\sum w(F_o^2 - F_c^2)^2 / (N_o - N_v)]^{1/2}$$

where:  $N_o$  = number of observations  
 $N_v$  = number of variables

(5) International Tables for Crystallography, Vol.C (1992). Ed. A.J.C. Wilson, Kluwer Academic Publishers, Dordrecht, Netherlands, Table 6.1.1.4, pp. 572.

(6) Ibers, J. A. & Hamilton, W. C.; Acta Crystallogr., 17, 781 (1964).

(7) Creagh, D. C. & McAuley, W.J. ; "International Tables for Crystallography", Vol C, (A.J.C. Wilson, ed.), Kluwer Academic Publishers, Boston, Table 4.2.6.8, pages 219-222 (1992).

(8) Creagh, D. C. & Hubbell, J.H.; "International Tables for Crystallography", Vol C, (A.J.C. Wilson, ed.), Kluwer Academic Publishers, Boston, Table 4.2.4.3, pages 200-206 (1992).

(9) CrystalStructure 4.2: Crystal Structure Analysis Package, Rigaku Corporation (2000-2015). Tokyo 196-8666, Japan.

(10) SHELXL Version 2014/7: Sheldrick, G. M. (2008). Acta Cryst. A64, 112-122.

## EXPERIMENTAL DETAILS

### A. Crystal Data

|                         |                                                                                                                                                              |
|-------------------------|--------------------------------------------------------------------------------------------------------------------------------------------------------------|
| Empirical Formula       | $C_{69}H_{99}Cl_6NO_3Ti_3$                                                                                                                                   |
| Formula Weight          | 1346.96                                                                                                                                                      |
| Crystal Color, Habit    | red, plate                                                                                                                                                   |
| Crystal Dimensions      | 0.330 X 0.130 X 0.050 mm                                                                                                                                     |
| Crystal System          | monoclinic                                                                                                                                                   |
| Lattice Type            | Primitive                                                                                                                                                    |
| Lattice Parameters      | $a = 13.2258(6) \text{ \AA}$<br>$b = 22.4804(11) \text{ \AA}$<br>$c = 24.4338(12) \text{ \AA}$<br>$\beta = 99.642(4)^\circ$<br>$V = 7162.1(6) \text{ \AA}^3$ |
| Space Group             | $P2_1/n$ (#14)                                                                                                                                               |
| Z value                 | 4                                                                                                                                                            |
| $D_{\text{calc}}$       | $1.249 \text{ g/cm}^3$                                                                                                                                       |
| $F_{000}$               | 2848.00                                                                                                                                                      |
| $\mu(\text{MoK}\alpha)$ | $5.929 \text{ cm}^{-1}$                                                                                                                                      |

## B. Intensity Measurements

|                                                        |                                                                                      |
|--------------------------------------------------------|--------------------------------------------------------------------------------------|
| Diffractometer                                         | XtaLAB mini                                                                          |
| Radiation                                              | MoK $\alpha$ ( $\lambda = 0.71073 \text{ \AA}$ )<br>multi-layer mirror monochromated |
| Voltage, Current                                       | 50kV, 24mA                                                                           |
| Temperature                                            | -180.0 $^{\circ}$ C                                                                  |
| Detector Aperture                                      | 75.0 mm (diameter)                                                                   |
| Data Images                                            | 540 exposures                                                                        |
| $\omega$ oscillation Range ( $\chi=54.0, \phi=0.0$ )   | -60.0 - 120.0 $^{\circ}$                                                             |
| Exposure Rate                                          | 16.0 sec./ $^{\circ}$                                                                |
| Detector Swing Angle                                   | 30.00 $^{\circ}$                                                                     |
| $\omega$ oscillation Range ( $\chi=54.0, \phi=120.0$ ) | -60.0 - 120.0 $^{\circ}$                                                             |
| Exposure Rate                                          | 16.0 sec./ $^{\circ}$                                                                |
| Detector Swing Angle                                   | 30.00 $^{\circ}$                                                                     |
| $\omega$ oscillation Range ( $\chi=54.0, \phi=240.0$ ) | -60.0 - 120.0 $^{\circ}$                                                             |
| Exposure Rate                                          | 16.0 sec./ $^{\circ}$                                                                |
| Detector Swing Angle                                   | 30.00 $^{\circ}$                                                                     |
| Detector Position                                      | 50.00 mm                                                                             |
| Pixel Size                                             | 0.073 mm                                                                             |
| $2\theta_{\max}$                                       | 55.0 $^{\circ}$                                                                      |
| No. of Reflections Measured                            | Total: 75160                                                                         |

Corrections

Unique: 16446 ( $R_{\text{int}} = 0.1157$ )

Lorentz-polarization

Absorption

(trans. factors: 0.936 - 0.971)



### C. Structure Solution and Refinement

|                                       |                                                                                                                      |
|---------------------------------------|----------------------------------------------------------------------------------------------------------------------|
| Structure Solution                    | Direct Methods (SHELXT)                                                                                              |
| Refinement                            | Full-matrix least-squares on F <sup>2</sup>                                                                          |
| Function Minimized                    | $\sum w (F_o^2 - F_c^2)^2$                                                                                           |
| Least Squares Weights                 | $w = 1 / [ \sigma^2(F_o^2) + (0.0399 \cdot P)^2 + 5.5057 \cdot P ]$<br>where $P = (\text{Max}(F_o^2, 0) + 2F_c^2)/3$ |
| $2\theta_{\text{max}}$ cutoff         | 55.0°                                                                                                                |
| Anomalous Dispersion                  | All non-hydrogen atoms                                                                                               |
| No. Observations (All reflections)    | 16446                                                                                                                |
| No. Variables                         | 739                                                                                                                  |
| Reflection/Parameter Ratio            | 22.25                                                                                                                |
| Residuals: R1 ( $I > 2.00\sigma(I)$ ) | 0.0571                                                                                                               |
| Residuals: R (All reflections)        | 0.1132                                                                                                               |
| Residuals: wR2 (All reflections)      | 0.1330                                                                                                               |
| Goodness of Fit Indicator             | 1.012                                                                                                                |
| Max Shift/Error in Final Cycle        | 0.001                                                                                                                |
| Maximum peak in Final Diff. Map       | 0.47 e <sup>-</sup> /Å <sup>3</sup>                                                                                  |
| Minimum peak in Final Diff. Map       | -0.59 e <sup>-</sup> /Å <sup>3</sup>                                                                                 |

Table S12-1. Atomic coordinates and  $B_{iso}/B_{eq}$ 

| atom | x           | y           | z            | $B_{eq}$  |
|------|-------------|-------------|--------------|-----------|
| Ti1  | 0.87213(4)  | 0.80126(3)  | 0.12163(2)   | 1.160(10) |
| Ti2  | 0.97466(4)  | 0.61217(3)  | 0.34628(2)   | 1.236(11) |
| Ti3  | 0.74388(5)  | 0.86571(3)  | 0.41457(3)   | 1.625(12) |
| Cl1  | 0.99463(7)  | 0.77997(4)  | 0.07021(4)   | 2.231(17) |
| Cl2  | 0.96031(6)  | 0.79098(4)  | 0.20809(3)   | 1.916(16) |
| Cl3  | 1.02344(7)  | 0.70625(4)  | 0.33600(4)   | 2.018(16) |
| Cl4  | 1.08453(6)  | 0.58496(4)  | 0.42370(4)   | 2.078(17) |
| Cl5  | 0.75121(8)  | 0.95782(4)  | 0.45159(4)   | 2.91(2)   |
| Cl6  | 0.87265(7)  | 0.86880(5)  | 0.36488(4)   | 2.768(19) |
| O1   | 0.79022(16) | 0.73798(9)  | 0.11262(9)   | 1.27(4)   |
| O2   | 0.85303(16) | 0.61947(9)  | 0.36921(9)   | 1.16(4)   |
| O3   | 0.63185(16) | 0.86951(10) | 0.36197(9)   | 1.44(4)   |
| N1   | 0.65644(19) | 0.72527(11) | 0.25601(10)  | 1.08(5)   |
| C1   | 0.6853(2)   | 0.74466(14) | 0.20344(13)  | 1.21(5)   |
| C2   | 0.6597(2)   | 0.69900(14) | 0.15813(13)  | 1.20(5)   |
| C3   | 0.7113(2)   | 0.69792(14) | 0.11255(13)  | 1.16(5)   |
| C4   | 0.6872(3)   | 0.65629(14) | 0.06946(13)  | 1.39(6)   |
| C5   | 0.6116(3)   | 0.61473(15) | 0.07592(14)  | 1.55(6)   |
| C6   | 0.5609(3)   | 0.61266(15) | 0.12119(13)  | 1.48(6)   |
| C7   | 0.5853(2)   | 0.65639(14) | 0.16139(13)  | 1.27(6)   |
| C8   | 0.7452(3)   | 0.65284(15) | 0.01998(14)  | 1.73(6)   |
| C9   | 0.8549(3)   | 0.63252(17) | 0.04285(15)  | 2.34(7)   |
| C10  | 0.7458(3)   | 0.71207(15) | -0.01075(14) | 1.88(6)   |
| C11  | 0.6972(3)   | 0.60673(16) | -0.02272(14) | 2.11(7)   |
| C12  | 0.4877(3)   | 0.56259(15) | 0.13127(14)  | 1.76(6)   |
| C13  | 0.4613(3)   | 0.52132(16) | 0.08110(15)  | 2.36(7)   |
| C14  | 0.5409(3)   | 0.52469(17) | 0.17995(15)  | 2.61(8)   |
| C15  | 0.3889(3)   | 0.58808(18) | 0.14646(15)  | 2.54(8)   |
| C16  | 0.7280(2)   | 0.86019(14) | 0.09024(14)  | 1.42(6)   |
| C17  | 0.8034(3)   | 0.87368(15) | 0.05831(14)  | 1.54(6)   |
| C18  | 0.8881(3)   | 0.90196(15) | 0.09244(14)  | 1.54(6)   |
| C19  | 0.8655(3)   | 0.90450(14) | 0.14634(14)  | 1.49(6)   |
| C20  | 0.7678(3)   | 0.87780(14) | 0.14515(14)  | 1.52(6)   |
| C21  | 0.6240(3)   | 0.83499(16) | 0.06916(15)  | 1.86(6)   |
| C22  | 0.9815(3)   | 0.92685(17) | 0.07406(15)  | 2.21(7)   |
| C23  | 0.9284(3)   | 0.93278(16) | 0.19607(15)  | 2.14(7)   |
| C24  | 0.7264(2)   | 0.67868(15) | 0.28134(13)  | 1.27(6)   |

Table S12-1. Atomic coordinates and  $B_{\text{iso}}/B_{\text{eq}}$  (continued)

| atom | x         | y           | z           | $B_{\text{eq}}$ |
|------|-----------|-------------|-------------|-----------------|
| C25  | 0.6846(2) | 0.64650(14) | 0.32698(13) | 1.17(5)         |
| C26  | 0.7498(2) | 0.61914(14) | 0.37104(13) | 1.14(5)         |
| C27  | 0.7117(2) | 0.59396(14) | 0.41597(13) | 1.16(5)         |
| C28  | 0.6049(2) | 0.59445(15) | 0.41277(14) | 1.51(6)         |
| C29  | 0.5372(2) | 0.61831(15) | 0.36860(13) | 1.39(6)         |
| C30  | 0.5798(2) | 0.64494(14) | 0.32638(14) | 1.36(6)         |
| C31  | 0.7821(2) | 0.56736(15) | 0.46659(13) | 1.39(6)         |
| C32  | 0.8403(3) | 0.51408(15) | 0.44835(14) | 1.79(6)         |
| C33  | 0.7216(3) | 0.54585(17) | 0.51079(14) | 2.15(7)         |
| C34  | 0.8569(3) | 0.61518(16) | 0.49371(14) | 1.86(6)         |
| C35  | 0.4202(3) | 0.61496(16) | 0.36423(14) | 1.71(6)         |
| C36  | 0.3815(3) | 0.5688(2)   | 0.3199(2)   | 3.93(10)        |
| C37  | 0.3879(3) | 0.5975(2)   | 0.41835(17) | 3.93(11)        |
| C38  | 0.3700(3) | 0.67446(19) | 0.34701(19) | 3.35(9)         |
| C39  | 0.8994(3) | 0.54080(15) | 0.28095(14) | 1.48(6)         |
| C40  | 0.9278(3) | 0.59113(15) | 0.25252(13) | 1.49(6)         |
| C41  | 1.0362(3) | 0.59525(15) | 0.26113(14) | 1.52(6)         |
| C42  | 1.0732(3) | 0.54943(16) | 0.29801(14) | 1.82(6)         |
| C43  | 0.9899(3) | 0.51517(15) | 0.31012(14) | 1.47(6)         |
| C44  | 0.7930(3) | 0.51637(16) | 0.27834(15) | 2.01(6)         |
| C45  | 1.0976(3) | 0.63793(16) | 0.23330(15) | 2.09(7)         |
| C46  | 0.9980(3) | 0.45959(15) | 0.34411(16) | 2.16(7)         |
| C47  | 0.6571(2) | 0.77508(14) | 0.29402(13) | 1.23(5)         |
| C48  | 0.5601(2) | 0.81130(14) | 0.28467(13) | 1.34(6)         |
| C49  | 0.5500(2) | 0.85854(15) | 0.32060(13) | 1.29(6)         |
| C50  | 0.4601(3) | 0.89308(15) | 0.31465(14) | 1.60(6)         |
| C51  | 0.3826(3) | 0.87810(15) | 0.27042(14) | 1.68(6)         |
| C52  | 0.3887(3) | 0.83123(15) | 0.23414(14) | 1.57(6)         |
| C53  | 0.4790(2) | 0.79778(15) | 0.24256(13) | 1.38(6)         |
| C54  | 0.4464(3) | 0.94505(16) | 0.35349(14) | 1.97(6)         |
| C55  | 0.5274(3) | 0.99252(16) | 0.34941(15) | 2.34(7)         |
| C56  | 0.3410(3) | 0.97493(19) | 0.33832(17) | 2.99(8)         |
| C57  | 0.4549(3) | 0.92216(18) | 0.41329(15) | 2.69(8)         |
| C58  | 0.3012(3) | 0.81415(16) | 0.18719(15) | 1.89(6)         |
| C59  | 0.2513(3) | 0.75716(18) | 0.20365(17) | 2.77(8)         |
| C60  | 0.3413(3) | 0.8034(2)   | 0.13313(15) | 3.08(8)         |
| C61  | 0.2196(3) | 0.86243(19) | 0.17714(19) | 3.72(10)        |

Table S12-1. Atomic coordinates and  $B_{\text{iso}}/B_{\text{eq}}$  (continued)

| atom | x         | y           | z           | $B_{\text{eq}}$ |
|------|-----------|-------------|-------------|-----------------|
| C62  | 0.6704(3) | 0.78726(16) | 0.45876(14) | 2.10(7)         |
| C63  | 0.7575(3) | 0.76564(16) | 0.43893(15) | 2.27(7)         |
| C64  | 0.8473(3) | 0.79146(16) | 0.46874(15) | 2.19(7)         |
| C65  | 0.8142(3) | 0.83275(17) | 0.50518(14) | 2.13(7)         |
| C66  | 0.7058(3) | 0.82995(17) | 0.50002(15) | 2.25(7)         |
| C67  | 0.5626(3) | 0.76742(18) | 0.44038(15) | 2.67(8)         |
| C68  | 0.9554(3) | 0.77637(19) | 0.46501(17) | 3.07(8)         |
| C69  | 0.6439(3) | 0.86309(19) | 0.53630(16) | 2.85(8)         |

$$B_{\text{eq}} = 8/3 \pi^2 (U_{11}(aa^*)^2 + U_{22}(bb^*)^2 + U_{33}(cc^*)^2 + 2U_{12}(aa^*bb^*)\cos \gamma + 2U_{13}(aa^*cc^*)\cos \beta + 2U_{23}(bb^*cc^*)\cos \alpha)$$

Table S12-2. Atomic coordinates and  $B_{\text{iso}}$  involving hydrogen atoms

| atom | x       | y       | z        | $B_{\text{iso}}$ |
|------|---------|---------|----------|------------------|
| H1A  | 0.75991 | 0.75275 | 0.20930  | 1.450            |
| H1B  | 0.64913 | 0.78223 | 0.19152  | 1.450            |
| H5   | 0.59365 | 0.58600 | 0.04744  | 1.859            |
| H7   | 0.54981 | 0.65709 | 0.19212  | 1.519            |
| H9A  | 0.85277 | 0.59457 | 0.06235  | 2.808            |
| H9B  | 0.89316 | 0.62751 | 0.01210  | 2.808            |
| H9C  | 0.88889 | 0.66252 | 0.06869  | 2.808            |
| H10A | 0.77611 | 0.74294 | 0.01526  | 2.259            |
| H10B | 0.78646 | 0.70801 | -0.04061 | 2.259            |
| H10C | 0.67537 | 0.72322 | -0.02660 | 2.259            |
| H11A | 0.69533 | 0.56795 | -0.00460 | 2.531            |
| H11B | 0.62724 | 0.61897 | -0.03845 | 2.531            |
| H11C | 0.73832 | 0.60376 | -0.05245 | 2.531            |
| H13A | 0.52467 | 0.50496 | 0.07134  | 2.829            |
| H13B | 0.41786 | 0.48875 | 0.09027  | 2.829            |
| H13C | 0.42464 | 0.54383 | 0.04956  | 2.829            |
| H14A | 0.60444 | 0.50805 | 0.17074  | 3.129            |
| H14B | 0.55693 | 0.54957 | 0.21321  | 3.129            |
| H14C | 0.49527 | 0.49224 | 0.18700  | 3.129            |
| H15A | 0.40569 | 0.61451 | 0.17859  | 3.046            |
| H15B | 0.35218 | 0.61058 | 0.11490  | 3.046            |
| H15C | 0.34540 | 0.55550 | 0.15562  | 3.046            |
| H17  | 0.79499 | 0.86965 | 0.01704  | 1.844            |
| H20  | 0.72915 | 0.87682 | 0.17699  | 1.820            |
| H21A | 0.58651 | 0.82983 | 0.10020  | 2.238            |
| H21B | 0.58608 | 0.86226 | 0.04186  | 2.238            |
| H21C | 0.63132 | 0.79637 | 0.05163  | 2.238            |
| H22A | 0.97851 | 0.91907 | 0.03436  | 2.652            |
| H22B | 0.98448 | 0.96986 | 0.08069  | 2.652            |
| H22C | 1.04272 | 0.90798 | 0.09506  | 2.652            |
| H23A | 0.89385 | 0.92780 | 0.22827  | 2.565            |
| H23B | 0.99600 | 0.91381 | 0.20358  | 2.565            |
| H23C | 0.93652 | 0.97527 | 0.18897  | 2.565            |
| H24A | 0.79339 | 0.69672 | 0.29678  | 1.527            |
| H24B | 0.73777 | 0.64972 | 0.25245  | 1.527            |
| H28  | 0.57718 | 0.57743 | 0.44261  | 1.815            |
| H30  | 0.53557 | 0.66263 | 0.29614  | 1.629            |

Table S12-2. Atomic coordinates and  $B_{\text{iso}}$  involving hydrogens/ $B_{\text{eq}}$  (continued)

| atom | x       | y       | z       | $B_{\text{eq}}$ |
|------|---------|---------|---------|-----------------|
| H32A | 0.87990 | 0.52676 | 0.41989 | 2.152           |
| H32B | 0.88701 | 0.49816 | 0.48040 | 2.152           |
| H32C | 0.79137 | 0.48317 | 0.43306 | 2.152           |
| H33A | 0.68354 | 0.57926 | 0.52319 | 2.581           |
| H33B | 0.67340 | 0.51475 | 0.49511 | 2.581           |
| H33C | 0.76903 | 0.52974 | 0.54245 | 2.581           |
| H34A | 0.89736 | 0.63015 | 0.46650 | 2.238           |
| H34B | 0.81825 | 0.64802 | 0.50663 | 2.238           |
| H34C | 0.90295 | 0.59791 | 0.52532 | 2.238           |
| H36A | 0.40253 | 0.58025 | 0.28476 | 4.718           |
| H36B | 0.41064 | 0.52984 | 0.33154 | 4.718           |
| H36C | 0.30651 | 0.56670 | 0.31491 | 4.718           |
| H37A | 0.41903 | 0.55917 | 0.43070 | 4.716           |
| H37B | 0.41076 | 0.62790 | 0.44645 | 4.716           |
| H37C | 0.31307 | 0.59402 | 0.41308 | 4.716           |
| H38A | 0.38940 | 0.68719 | 0.31184 | 4.019           |
| H38B | 0.29528 | 0.67032 | 0.34237 | 4.019           |
| H38C | 0.39297 | 0.70420 | 0.37573 | 4.019           |
| H40  | 0.87998 | 0.61561 | 0.22548 | 1.793           |
| H42  | 1.14729 | 0.53964 | 0.31035 | 2.186           |
| H44A | 0.74380 | 0.54248 | 0.25539 | 2.416           |
| H44B | 0.78943 | 0.47645 | 0.26201 | 2.416           |
| H44C | 0.77643 | 0.51425 | 0.31590 | 2.416           |
| H45A | 1.05132 | 0.66510 | 0.20979 | 2.511           |
| H45B | 1.14297 | 0.66083 | 0.26148 | 2.511           |
| H45C | 1.13893 | 0.61589 | 0.21037 | 2.511           |
| H46A | 1.07004 | 0.45214 | 0.35972 | 2.587           |
| H46B | 0.95830 | 0.46417 | 0.37432 | 2.587           |
| H46C | 0.97083 | 0.42600 | 0.32058 | 2.587           |
| H47A | 0.71553 | 0.80139 | 0.29023 | 1.473           |
| H47B | 0.66825 | 0.75967 | 0.33252 | 1.473           |
| H51  | 0.32197 | 0.90153 | 0.26489 | 2.020           |
| H53  | 0.48521 | 0.76495 | 0.21887 | 1.657           |
| H55A | 0.51856 | 1.02567 | 0.37422 | 2.809           |
| H55B | 0.59589 | 0.97531 | 0.36026 | 2.809           |
| H55C | 0.51970 | 1.00705 | 0.31112 | 2.809           |
| H56A | 0.28697 | 0.94563 | 0.34052 | 3.586           |

Table S12-2. Atomic coordinates and  $B_{\text{iso}}$  involving hydrogens/ $B_{\text{eq}}$  (continued)

| atom | x       | y       | z       | $B_{\text{eq}}$ |
|------|---------|---------|---------|-----------------|
| H56B | 0.33552 | 1.00752 | 0.36430 | 3.586           |
| H56C | 0.33327 | 0.99072 | 0.30046 | 3.586           |
| H57A | 0.40229 | 0.89181 | 0.41494 | 3.224           |
| H57B | 0.52296 | 0.90479 | 0.42520 | 3.224           |
| H57C | 0.44479 | 0.95528 | 0.43789 | 3.224           |
| H59A | 0.30291 | 0.72552 | 0.21029 | 3.322           |
| H59B | 0.22271 | 0.76417 | 0.23758 | 3.322           |
| H59C | 0.19633 | 0.74518 | 0.17365 | 3.322           |
| H60A | 0.39402 | 0.77234 | 0.13881 | 3.699           |
| H60B | 0.28462 | 0.79058 | 0.10439 | 3.699           |
| H60C | 0.37086 | 0.84024 | 0.12139 | 3.699           |
| H61A | 0.19284 | 0.86999 | 0.21156 | 4.469           |
| H61B | 0.24972 | 0.89903 | 0.16520 | 4.469           |
| H61C | 0.16349 | 0.84937 | 0.14820 | 4.469           |
| H63  | 0.75655 | 0.73218 | 0.41189 | 2.727           |
| H65  | 0.86029 | 0.85675 | 0.53349 | 2.557           |
| H67A | 0.51702 | 0.78960 | 0.46077 | 3.204           |
| H67B | 0.54266 | 0.77483 | 0.40050 | 3.204           |
| H67C | 0.55713 | 0.72480 | 0.44777 | 3.204           |
| H68A | 0.95654 | 0.74625 | 0.43613 | 3.680           |
| H68B | 0.99112 | 0.81219 | 0.45567 | 3.680           |
| H68C | 0.98964 | 0.76072 | 0.50078 | 3.680           |
| H69A | 0.68893 | 0.88981 | 0.56105 | 3.417           |
| H69B | 0.59063 | 0.88642 | 0.51304 | 3.417           |
| H69C | 0.61174 | 0.83468 | 0.55850 | 3.417           |

Table S12-3. Anisotropic displacement parameters

| atom | U <sub>11</sub> | U <sub>22</sub> | U <sub>33</sub> | U <sub>12</sub> | U <sub>13</sub> | U <sub>23</sub> |
|------|-----------------|-----------------|-----------------|-----------------|-----------------|-----------------|
| Ti1  | 0.0122(3)       | 0.0167(3)       | 0.0150(3)       | -0.0009(2)      | 0.0018(2)       | -0.0007(2)      |
| Ti2  | 0.0104(3)       | 0.0187(3)       | 0.0175(3)       | 0.0004(3)       | 0.0013(2)       | 0.0027(3)       |
| Ti3  | 0.0189(3)       | 0.0191(3)       | 0.0219(3)       | 0.0000(3)       | -0.0021(3)      | -0.0024(3)      |
| Cl1  | 0.0208(5)       | 0.0340(5)       | 0.0330(5)       | -0.0041(4)      | 0.0133(4)       | -0.0097(4)      |
| Cl2  | 0.0211(4)       | 0.0286(5)       | 0.0204(4)       | -0.0003(4)      | -0.0042(3)      | 0.0033(4)       |
| Cl3  | 0.0285(5)       | 0.0221(5)       | 0.0268(5)       | -0.0065(4)      | 0.0068(4)       | -0.0003(4)      |
| Cl4  | 0.0155(4)       | 0.0391(5)       | 0.0226(5)       | 0.0033(4)       | -0.0020(3)      | 0.0068(4)       |
| Cl5  | 0.0426(6)       | 0.0223(5)       | 0.0398(6)       | 0.0019(4)       | -0.0100(5)      | -0.0080(4)      |
| Cl6  | 0.0204(5)       | 0.0402(6)       | 0.0454(6)       | -0.0057(4)      | 0.0077(4)       | -0.0018(5)      |
| O1   | 0.0147(12)      | 0.0158(12)      | 0.0181(12)      | -0.0032(10)     | 0.0040(9)       | -0.0008(10)     |
| O2   | 0.0115(11)      | 0.0175(12)      | 0.0151(12)      | 0.0009(9)       | 0.0026(9)       | 0.0017(9)       |
| O3   | 0.0173(12)      | 0.0182(12)      | 0.0183(12)      | 0.0024(10)      | 0.0004(10)      | -0.0013(10)     |
| N1   | 0.0147(14)      | 0.0168(14)      | 0.0097(13)      | 0.0013(11)      | 0.0028(11)      | 0.0017(11)      |
| C1   | 0.0159(17)      | 0.0174(17)      | 0.0132(16)      | -0.0035(14)     | 0.0040(13)      | 0.0011(13)      |
| C2   | 0.0135(16)      | 0.0182(17)      | 0.0128(16)      | 0.0007(14)      | -0.0014(13)     | 0.0010(14)      |
| C3   | 0.0128(16)      | 0.0138(16)      | 0.0172(17)      | 0.0002(13)      | 0.0021(13)      | 0.0008(13)      |
| C4   | 0.0187(17)      | 0.0176(17)      | 0.0157(17)      | -0.0014(14)     | 0.0010(14)      | -0.0003(14)     |
| C5   | 0.0219(18)      | 0.0181(18)      | 0.0167(18)      | -0.0010(15)     | -0.0032(14)     | -0.0020(14)     |
| C6   | 0.0161(17)      | 0.0211(18)      | 0.0169(17)      | -0.0037(14)     | -0.0033(14)     | 0.0034(14)      |
| C7   | 0.0157(17)      | 0.0182(17)      | 0.0141(17)      | -0.0017(14)     | 0.0023(13)      | 0.0014(14)      |
| C8   | 0.0212(19)      | 0.0238(19)      | 0.0205(19)      | -0.0024(15)     | 0.0033(14)      | -0.0086(15)     |
| C9   | 0.027(2)        | 0.036(2)        | 0.027(2)        | 0.0018(18)      | 0.0058(16)      | -0.0124(18)     |
| C10  | 0.028(2)        | 0.028(2)        | 0.0168(18)      | -0.0083(17)     | 0.0071(15)      | -0.0049(15)     |
| C11  | 0.033(2)        | 0.030(2)        | 0.0191(19)      | -0.0046(17)     | 0.0084(16)      | -0.0092(16)     |
| C12  | 0.0234(19)      | 0.0210(19)      | 0.0197(19)      | -0.0078(15)     | -0.0047(15)     | 0.0044(15)      |
| C13  | 0.036(2)        | 0.024(2)        | 0.027(2)        | -0.0151(18)     | -0.0021(17)     | 0.0026(17)      |
| C14  | 0.038(2)        | 0.027(2)        | 0.030(2)        | -0.0122(18)     | -0.0066(18)     | 0.0083(17)      |
| C15  | 0.028(2)        | 0.043(2)        | 0.024(2)        | -0.0187(19)     | -0.0010(16)     | 0.0058(18)      |
| C16  | 0.0143(17)      | 0.0144(17)      | 0.0241(19)      | 0.0010(14)      | -0.0005(14)     | 0.0039(14)      |
| C17  | 0.0187(18)      | 0.0220(19)      | 0.0167(18)      | 0.0010(15)      | -0.0002(14)     | 0.0065(14)      |
| C18  | 0.0175(17)      | 0.0183(18)      | 0.0220(19)      | -0.0035(14)     | 0.0008(14)      | 0.0056(14)      |
| C19  | 0.0173(17)      | 0.0130(17)      | 0.0254(19)      | 0.0010(14)      | 0.0013(14)      | 0.0007(14)      |
| C20  | 0.0180(17)      | 0.0160(18)      | 0.0243(19)      | 0.0026(14)      | 0.0053(14)      | -0.0007(14)     |
| C21  | 0.0162(18)      | 0.025(2)        | 0.028(2)        | -0.0010(15)     | -0.0007(15)     | 0.0027(16)      |
| C22  | 0.025(2)        | 0.028(2)        | 0.031(2)        | -0.0068(17)     | 0.0041(16)      | 0.0083(17)      |
| C23  | 0.023(2)        | 0.024(2)        | 0.033(2)        | -0.0002(16)     | 0.0021(16)      | -0.0055(17)     |
| C24  | 0.0109(16)      | 0.0210(18)      | 0.0173(17)      | 0.0006(14)      | 0.0047(13)      | 0.0018(14)      |



Table S12-3. Anisotropic displacement parameters (continued)

| atom | U <sub>11</sub> | U <sub>22</sub> | U <sub>33</sub> | U <sub>12</sub> | U <sub>13</sub> | U <sub>23</sub> |
|------|-----------------|-----------------|-----------------|-----------------|-----------------|-----------------|
| C25  | 0.0121(16)      | 0.0176(17)      | 0.0150(17)      | 0.0020(13)      | 0.0031(13)      | 0.0010(13)      |
| C26  | 0.0096(15)      | 0.0172(17)      | 0.0163(17)      | 0.0020(13)      | 0.0018(13)      | -0.0025(13)     |
| C27  | 0.0141(16)      | 0.0172(17)      | 0.0121(16)      | -0.0003(14)     | 0.0007(13)      | -0.0010(13)     |
| C28  | 0.0154(17)      | 0.0258(19)      | 0.0168(18)      | 0.0011(15)      | 0.0044(14)      | 0.0030(15)      |
| C29  | 0.0115(16)      | 0.0219(18)      | 0.0193(18)      | 0.0006(14)      | 0.0019(13)      | 0.0023(14)      |
| C30  | 0.0106(16)      | 0.0204(18)      | 0.0190(18)      | 0.0007(14)      | -0.0020(13)     | 0.0036(14)      |
| C31  | 0.0139(17)      | 0.0232(19)      | 0.0144(17)      | 0.0009(14)      | -0.0015(13)     | 0.0027(14)      |
| C32  | 0.0187(18)      | 0.0235(19)      | 0.0242(19)      | 0.0018(15)      | -0.0014(15)     | 0.0066(15)      |
| C33  | 0.0172(18)      | 0.041(2)        | 0.022(2)        | 0.0004(17)      | -0.0009(15)     | 0.0122(17)      |
| C34  | 0.0211(19)      | 0.032(2)        | 0.0164(18)      | 0.0009(16)      | -0.0006(14)     | 0.0010(16)      |
| C35  | 0.0120(17)      | 0.031(2)        | 0.0224(19)      | 0.0011(15)      | 0.0028(14)      | 0.0072(16)      |
| C36  | 0.017(2)        | 0.061(3)        | 0.071(3)        | -0.011(2)       | 0.007(2)        | -0.022(3)       |
| C37  | 0.017(2)        | 0.095(4)        | 0.039(3)        | 0.010(2)        | 0.0098(18)      | 0.035(3)        |
| C38  | 0.0141(19)      | 0.047(3)        | 0.066(3)        | 0.0073(19)      | 0.0050(19)      | 0.015(2)        |
| C39  | 0.0152(17)      | 0.0209(18)      | 0.0209(18)      | -0.0019(14)     | 0.0053(14)      | -0.0047(14)     |
| C40  | 0.0183(18)      | 0.0210(18)      | 0.0170(18)      | -0.0004(15)     | 0.0015(14)      | -0.0019(14)     |
| C41  | 0.0196(18)      | 0.0214(18)      | 0.0181(18)      | 0.0016(15)      | 0.0066(14)      | 0.0006(14)      |
| C42  | 0.0154(17)      | 0.029(2)        | 0.026(2)        | 0.0022(16)      | 0.0063(14)      | -0.0018(16)     |
| C43  | 0.0180(17)      | 0.0198(18)      | 0.0187(18)      | 0.0030(14)      | 0.0052(14)      | -0.0007(14)     |
| C44  | 0.0194(18)      | 0.026(2)        | 0.032(2)        | -0.0062(16)     | 0.0054(16)      | -0.0069(17)     |
| C45  | 0.026(2)        | 0.023(2)        | 0.033(2)        | -0.0031(16)     | 0.0112(17)      | 0.0014(17)      |
| C46  | 0.029(2)        | 0.0187(19)      | 0.036(2)        | 0.0046(16)      | 0.0101(17)      | 0.0044(16)      |
| C47  | 0.0138(16)      | 0.0197(18)      | 0.0125(16)      | 0.0031(14)      | 0.0003(13)      | -0.0004(13)     |
| C48  | 0.0165(17)      | 0.0184(18)      | 0.0162(17)      | -0.0011(14)     | 0.0033(13)      | 0.0043(14)      |
| C49  | 0.0106(16)      | 0.0227(18)      | 0.0154(17)      | -0.0023(14)     | 0.0014(13)      | 0.0048(14)      |
| C50  | 0.0192(18)      | 0.0204(18)      | 0.0214(19)      | 0.0022(15)      | 0.0037(14)      | 0.0042(15)      |
| C51  | 0.0170(17)      | 0.025(2)        | 0.0228(19)      | 0.0024(15)      | 0.0059(14)      | 0.0056(15)      |
| C52  | 0.0155(17)      | 0.0243(19)      | 0.0194(18)      | -0.0032(15)     | 0.0010(14)      | 0.0072(15)      |
| C53  | 0.0137(16)      | 0.0208(18)      | 0.0182(17)      | -0.0035(14)     | 0.0033(13)      | 0.0044(14)      |
| C54  | 0.026(2)        | 0.028(2)        | 0.0207(19)      | 0.0102(17)      | 0.0043(15)      | 0.0038(16)      |
| C55  | 0.040(2)        | 0.0196(19)      | 0.029(2)        | 0.0053(17)      | 0.0042(18)      | 0.0002(16)      |
| C56  | 0.033(2)        | 0.048(3)        | 0.034(2)        | 0.018(2)        | 0.0061(18)      | -0.004(2)       |
| C57  | 0.036(2)        | 0.042(2)        | 0.027(2)        | 0.011(2)        | 0.0136(18)      | 0.0022(19)      |
| C58  | 0.0147(17)      | 0.025(2)        | 0.030(2)        | -0.0020(15)     | -0.0036(15)     | 0.0104(16)      |
| C59  | 0.024(2)        | 0.037(2)        | 0.039(2)        | -0.0107(18)     | -0.0089(17)     | 0.0078(19)      |
| C60  | 0.029(2)        | 0.059(3)        | 0.024(2)        | -0.011(2)       | -0.0079(17)     | 0.004(2)        |
| C61  | 0.029(2)        | 0.040(3)        | 0.061(3)        | 0.003(2)        | -0.026(2)       | 0.003(2)        |

Table S12-3. Anisotropic displacement parameters (continued)

| atom | U <sub>11</sub> | U <sub>22</sub> | U <sub>33</sub> | U <sub>12</sub> | U <sub>13</sub> | U <sub>23</sub> |
|------|-----------------|-----------------|-----------------|-----------------|-----------------|-----------------|
| C62  | 0.032(2)        | 0.028(2)        | 0.0164(18)      | -0.0067(17)     | -0.0035(16)     | 0.0056(16)      |
| C63  | 0.043(2)        | 0.0172(19)      | 0.021(2)        | 0.0010(17)      | -0.0110(17)     | 0.0012(15)      |
| C64  | 0.032(2)        | 0.026(2)        | 0.022(2)        | 0.0063(17)      | -0.0064(16)     | -0.0023(16)     |
| C65  | 0.030(2)        | 0.031(2)        | 0.0160(18)      | -0.0011(17)     | -0.0075(15)     | -0.0055(16)     |
| C66  | 0.033(2)        | 0.031(2)        | 0.0193(19)      | -0.0027(18)     | -0.0031(16)     | 0.0046(16)      |
| C67  | 0.041(2)        | 0.039(2)        | 0.020(2)        | -0.015(2)       | -0.0001(17)     | 0.0055(17)      |
| C68  | 0.035(2)        | 0.041(3)        | 0.036(2)        | 0.015(2)        | -0.0087(19)     | -0.007(2)       |
| C69  | 0.030(2)        | 0.054(3)        | 0.023(2)        | -0.001(2)       | 0.0011(17)      | -0.0042(19)     |

The general temperature factor expression:  $\exp(-2\pi^2(a^2U_{11}h^2 + b^2U_{22}k^2 + c^2U_{33}l^2 + 2a*b*U_{12}hk + 2a*c*U_{13}hl + 2b*c*U_{23}kl))$

Table S12-4. Bond lengths (Å)

| atom | atom | distance   | atom | atom | distance   |
|------|------|------------|------|------|------------|
| Ti1  | Cl1  | 2.2615(12) | Ti1  | Cl2  | 2.2475(8)  |
| Ti1  | O1   | 1.779(2)   | Ti1  | C16  | 2.343(3)   |
| Ti1  | C17  | 2.324(3)   | Ti1  | C18  | 2.393(3)   |
| Ti1  | C19  | 2.403(3)   | Ti1  | C20  | 2.337(3)   |
| Ti2  | Cl3  | 2.2376(11) | Ti2  | Cl4  | 2.2679(10) |
| Ti2  | O2   | 1.797(2)   | Ti2  | C39  | 2.362(3)   |
| Ti2  | C40  | 2.320(3)   | Ti2  | C41  | 2.388(4)   |
| Ti2  | C42  | 2.365(4)   | Ti2  | C43  | 2.374(3)   |
| Ti3  | Cl5  | 2.2552(11) | Ti3  | Cl6  | 2.2521(13) |
| Ti3  | O3   | 1.793(2)   | Ti3  | C62  | 2.361(4)   |
| Ti3  | C63  | 2.326(4)   | Ti3  | C64  | 2.409(4)   |
| Ti3  | C65  | 2.372(3)   | Ti3  | C66  | 2.369(4)   |
| O1   | C3   | 1.379(4)   | O2   | C26  | 1.374(4)   |
| O3   | C49  | 1.374(4)   | N1   | C1   | 1.466(4)   |
| N1   | C24  | 1.464(4)   | N1   | C47  | 1.454(4)   |
| C1   | C2   | 1.506(4)   | C2   | C3   | 1.400(5)   |
| C2   | C7   | 1.385(4)   | C3   | C4   | 1.405(4)   |
| C4   | C5   | 1.397(5)   | C4   | C8   | 1.538(5)   |
| C5   | C6   | 1.387(5)   | C6   | C7   | 1.389(4)   |
| C6   | C12  | 1.532(5)   | C8   | C9   | 1.535(5)   |
| C8   | C10  | 1.529(5)   | C8   | C11  | 1.531(5)   |
| C12  | C13  | 1.530(5)   | C12  | C14  | 1.535(5)   |
| C12  | C15  | 1.529(5)   | C16  | C17  | 1.399(5)   |
| C16  | C20  | 1.413(5)   | C16  | C21  | 1.497(4)   |
| C17  | C18  | 1.429(4)   | C18  | C19  | 1.400(5)   |
| C18  | C22  | 1.491(5)   | C19  | C20  | 1.421(5)   |
| C19  | C23  | 1.495(5)   | C24  | C25  | 1.509(5)   |
| C25  | C26  | 1.403(4)   | C25  | C30  | 1.384(4)   |
| C26  | C27  | 1.402(5)   | C27  | C28  | 1.401(5)   |
| C27  | C31  | 1.539(4)   | C28  | C29  | 1.390(4)   |
| C29  | C30  | 1.391(5)   | C29  | C35  | 1.535(5)   |
| C31  | C32  | 1.530(5)   | C31  | C33  | 1.526(5)   |
| C31  | C34  | 1.534(5)   | C35  | C36  | 1.525(6)   |
| C35  | C37  | 1.508(6)   | C35  | C38  | 1.521(5)   |
| C39  | C40  | 1.411(5)   | C39  | C43  | 1.409(4)   |
| C39  | C44  | 1.502(5)   | C40  | C41  | 1.416(5)   |
| C41  | C42  | 1.402(5)   | C41  | C45  | 1.493(5)   |

Table S12-4. Bond lengths (Å) (continued)

| atom | atom | distance | atom | atom | distance |
|------|------|----------|------|------|----------|
| C42  | C43  | 1.416(5) | C43  | C46  | 1.494(5) |
| C47  | C48  | 1.504(4) | C48  | C49  | 1.399(5) |
| C48  | C53  | 1.390(4) | C49  | C50  | 1.407(5) |
| C50  | C51  | 1.400(4) | C50  | C54  | 1.535(5) |
| C51  | C52  | 1.388(5) | C52  | C53  | 1.398(5) |
| C52  | C58  | 1.535(4) | C54  | C55  | 1.527(5) |
| C54  | C56  | 1.536(5) | C54  | C57  | 1.535(5) |
| C58  | C59  | 1.526(5) | C58  | C60  | 1.523(6) |
| C58  | C61  | 1.522(5) | C62  | C63  | 1.409(6) |
| C62  | C66  | 1.414(5) | C62  | C67  | 1.490(5) |
| C63  | C64  | 1.411(5) | C64  | C65  | 1.406(5) |
| C64  | C68  | 1.486(6) | C65  | C66  | 1.419(5) |
| C66  | C69  | 1.501(6) |      |      |          |

Table S12-5. Bond lengths involving hydrogens (Å)

| atom | atom | distance | atom | atom | distance |
|------|------|----------|------|------|----------|
| C1   | H1A  | 0.990    | C1   | H1B  | 0.990    |
| C5   | H5   | 0.950    | C7   | H7   | 0.950    |
| C9   | H9A  | 0.980    | C9   | H9B  | 0.980    |
| C9   | H9C  | 0.980    | C10  | H10A | 0.980    |
| C10  | H10B | 0.980    | C10  | H10C | 0.980    |
| C11  | H11A | 0.980    | C11  | H11B | 0.980    |
| C11  | H11C | 0.980    | C13  | H13A | 0.980    |
| C13  | H13B | 0.980    | C13  | H13C | 0.980    |
| C14  | H14A | 0.980    | C14  | H14B | 0.980    |
| C14  | H14C | 0.980    | C15  | H15A | 0.980    |
| C15  | H15B | 0.980    | C15  | H15C | 0.980    |
| C17  | H17  | 1.000    | C20  | H20  | 1.000    |
| C21  | H21A | 0.980    | C21  | H21B | 0.980    |
| C21  | H21C | 0.980    | C22  | H22A | 0.980    |
| C22  | H22B | 0.980    | C22  | H22C | 0.980    |
| C23  | H23A | 0.980    | C23  | H23B | 0.980    |
| C23  | H23C | 0.980    | C24  | H24A | 0.990    |
| C24  | H24B | 0.990    | C28  | H28  | 0.950    |
| C30  | H30  | 0.950    | C32  | H32A | 0.980    |
| C32  | H32B | 0.980    | C32  | H32C | 0.980    |
| C33  | H33A | 0.980    | C33  | H33B | 0.980    |
| C33  | H33C | 0.980    | C34  | H34A | 0.980    |
| C34  | H34B | 0.980    | C34  | H34C | 0.980    |
| C36  | H36A | 0.980    | C36  | H36B | 0.980    |
| C36  | H36C | 0.980    | C37  | H37A | 0.980    |
| C37  | H37B | 0.980    | C37  | H37C | 0.980    |
| C38  | H38A | 0.980    | C38  | H38B | 0.980    |
| C38  | H38C | 0.980    | C40  | H40  | 1.000    |
| C42  | H42  | 1.000    | C44  | H44A | 0.980    |
| C44  | H44B | 0.980    | C44  | H44C | 0.980    |
| C45  | H45A | 0.980    | C45  | H45B | 0.980    |
| C45  | H45C | 0.980    | C46  | H46A | 0.980    |
| C46  | H46B | 0.980    | C46  | H46C | 0.980    |
| C47  | H47A | 0.990    | C47  | H47B | 0.990    |
| C51  | H51  | 0.950    | C53  | H53  | 0.950    |
| C55  | H55A | 0.980    | C55  | H55B | 0.980    |
| C55  | H55C | 0.980    | C56  | H56A | 0.980    |

Table S12-5. Bond lengths involving hydrogens (Å) (continued)

| atom | atom | distance | atom | atom | distance |
|------|------|----------|------|------|----------|
| C56  | H56B | 0.980    | C56  | H56C | 0.980    |
| C57  | H57A | 0.980    | C57  | H57B | 0.980    |
| C57  | H57C | 0.980    | C59  | H59A | 0.980    |
| C59  | H59B | 0.980    | C59  | H59C | 0.980    |
| C60  | H60A | 0.980    | C60  | H60B | 0.980    |
| C60  | H60C | 0.980    | C61  | H61A | 0.980    |
| C61  | H61B | 0.980    | C61  | H61C | 0.980    |
| C63  | H63  | 1.000    | C65  | H65  | 1.000    |
| C67  | H67A | 0.980    | C67  | H67B | 0.980    |
| C67  | H67C | 0.980    | C68  | H68A | 0.980    |
| C68  | H68B | 0.980    | C68  | H68C | 0.980    |
| C69  | H69A | 0.980    | C69  | H69B | 0.980    |
| C69  | H69C | 0.980    |      |      |          |

Table S12-6. Bond angles (°)

| atom | atom | atom | angle      | atom | atom | atom | angle      |
|------|------|------|------------|------|------|------|------------|
| Cl1  | Ti1  | Cl2  | 101.14(4)  | Cl1  | Ti1  | O1   | 103.89(8)  |
| Cl1  | Ti1  | C16  | 123.86(9)  | Cl1  | Ti1  | C17  | 90.86(9)   |
| Cl1  | Ti1  | C18  | 85.83(9)   | Cl1  | Ti1  | C19  | 113.81(9)  |
| Cl1  | Ti1  | C20  | 143.13(9)  | Cl2  | Ti1  | O1   | 104.09(8)  |
| Cl2  | Ti1  | C16  | 129.17(9)  | Cl2  | Ti1  | C17  | 141.39(9)  |
| Cl2  | Ti1  | C18  | 108.63(8)  | Cl2  | Ti1  | C19  | 84.16(8)   |
| Cl2  | Ti1  | C20  | 94.55(8)   | O1   | Ti1  | C16  | 88.07(10)  |
| O1   | Ti1  | C17  | 108.40(10) | O1   | Ti1  | C18  | 143.29(10) |
| O1   | Ti1  | C19  | 139.11(11) | O1   | Ti1  | C20  | 104.28(11) |
| C16  | Ti1  | C17  | 34.89(12)  | C16  | Ti1  | C18  | 58.35(11)  |
| C16  | Ti1  | C19  | 58.27(11)  | C16  | Ti1  | C20  | 35.16(11)  |
| C17  | Ti1  | C18  | 35.23(11)  | C17  | Ti1  | C19  | 57.59(11)  |
| C17  | Ti1  | C20  | 57.77(12)  | C18  | Ti1  | C19  | 33.93(12)  |
| C18  | Ti1  | C20  | 57.47(12)  | C19  | Ti1  | C20  | 34.84(11)  |
| Cl3  | Ti2  | Cl4  | 101.07(4)  | Cl3  | Ti2  | O2   | 103.81(8)  |
| Cl3  | Ti2  | C39  | 131.52(9)  | Cl3  | Ti2  | C40  | 96.67(9)   |
| Cl3  | Ti2  | C41  | 84.60(9)   | Cl3  | Ti2  | C42  | 108.32(9)  |
| Cl3  | Ti2  | C43  | 141.48(9)  | Cl4  | Ti2  | O2   | 104.27(7)  |
| Cl4  | Ti2  | C39  | 121.26(9)  | Cl4  | Ti2  | C40  | 142.80(9)  |
| Cl4  | Ti2  | C41  | 114.80(8)  | Cl4  | Ti2  | C42  | 85.72(8)   |
| Cl4  | Ti2  | C43  | 88.87(8)   | O2   | Ti2  | C39  | 88.57(11)  |
| O2   | Ti2  | C40  | 102.81(11) | O2   | Ti2  | C41  | 137.70(10) |
| O2   | Ti2  | C42  | 143.77(11) | O2   | Ti2  | C43  | 109.64(11) |
| C39  | Ti2  | C40  | 35.07(12)  | C39  | Ti2  | C41  | 57.97(12)  |
| C39  | Ti2  | C42  | 57.52(12)  | C39  | Ti2  | C43  | 34.62(11)  |
| C40  | Ti2  | C41  | 34.98(11)  | C40  | Ti2  | C42  | 57.60(11)  |
| C40  | Ti2  | C43  | 58.02(11)  | C41  | Ti2  | C42  | 34.30(11)  |
| C41  | Ti2  | C43  | 57.79(12)  | C42  | Ti2  | C43  | 34.76(12)  |
| Cl5  | Ti3  | Cl6  | 101.67(5)  | Cl5  | Ti3  | O3   | 102.62(8)  |
| Cl5  | Ti3  | C62  | 119.72(10) | Cl5  | Ti3  | C63  | 142.09(10) |
| Cl5  | Ti3  | C64  | 115.69(9)  | Cl5  | Ti3  | C65  | 85.91(10)  |
| Cl5  | Ti3  | C66  | 87.67(10)  | Cl6  | Ti3  | O3   | 102.76(8)  |
| Cl6  | Ti3  | C62  | 132.54(10) | Cl6  | Ti3  | C63  | 97.75(11)  |
| Cl6  | Ti3  | C64  | 84.63(10)  | Cl6  | Ti3  | C65  | 107.42(10) |
| Cl6  | Ti3  | C66  | 141.01(10) | O3   | Ti3  | C62  | 90.53(11)  |
| O3   | Ti3  | C63  | 104.39(12) | O3   | Ti3  | C64  | 138.74(12) |
| O3   | Ti3  | C65  | 146.24(12) | O3   | Ti3  | C66  | 112.07(12) |

Table S12-6. Bond angles ( $^{\circ}$ ) (continued)

| atom | atom | atom | angle     | atom | atom | atom | angle     |
|------|------|------|-----------|------|------|------|-----------|
| C62  | Ti3  | C63  | 34.97(14) | C62  | Ti3  | C64  | 58.03(13) |
| C62  | Ti3  | C65  | 57.77(12) | C62  | Ti3  | C66  | 34.78(12) |
| C63  | Ti3  | C64  | 34.61(12) | C63  | Ti3  | C65  | 57.16(13) |
| C63  | Ti3  | C66  | 57.66(14) | C64  | Ti3  | C65  | 34.20(13) |
| C64  | Ti3  | C66  | 57.70(13) | C65  | Ti3  | C66  | 34.83(13) |
| Ti1  | O1   | C3   | 165.4(2)  | Ti2  | O2   | C26  | 163.0(2)  |
| Ti3  | O3   | C49  | 166.7(2)  | C1   | N1   | C24  | 110.1(2)  |
| C1   | N1   | C47  | 110.9(2)  | C24  | N1   | C47  | 110.2(2)  |
| N1   | C1   | C2   | 112.5(3)  | C1   | C2   | C3   | 121.1(3)  |
| C1   | C2   | C7   | 120.2(3)  | C3   | C2   | C7   | 118.6(3)  |
| O1   | C3   | C2   | 117.2(3)  | O1   | C3   | C4   | 120.9(3)  |
| C2   | C3   | C4   | 121.9(3)  | C3   | C4   | C5   | 116.0(3)  |
| C3   | C4   | C8   | 122.8(3)  | C5   | C4   | C8   | 121.0(3)  |
| C4   | C5   | C6   | 124.3(3)  | C5   | C6   | C7   | 117.0(3)  |
| C5   | C6   | C12  | 123.8(3)  | C7   | C6   | C12  | 119.0(3)  |
| C2   | C7   | C6   | 122.1(3)  | C4   | C8   | C9   | 107.1(3)  |
| C4   | C8   | C10  | 112.7(3)  | C4   | C8   | C11  | 111.4(3)  |
| C9   | C8   | C10  | 110.8(3)  | C9   | C8   | C11  | 107.8(3)  |
| C10  | C8   | C11  | 106.9(3)  | C6   | C12  | C13  | 112.5(3)  |
| C6   | C12  | C14  | 108.2(3)  | C6   | C12  | C15  | 110.7(3)  |
| C13  | C12  | C14  | 107.3(3)  | C13  | C12  | C15  | 109.4(3)  |
| C14  | C12  | C15  | 108.6(3)  | Ti1  | C16  | C17  | 71.81(18) |
| Ti1  | C16  | C20  | 72.20(18) | Ti1  | C16  | C21  | 123.3(2)  |
| C17  | C16  | C20  | 106.4(3)  | C17  | C16  | C21  | 126.2(3)  |
| C20  | C16  | C21  | 127.4(3)  | Ti1  | C17  | C16  | 73.30(19) |
| Ti1  | C17  | C18  | 75.06(19) | C16  | C17  | C18  | 109.5(3)  |
| Ti1  | C18  | C17  | 69.71(19) | Ti1  | C18  | C19  | 73.42(19) |
| Ti1  | C18  | C22  | 124.3(2)  | C17  | C18  | C19  | 107.3(3)  |
| C17  | C18  | C22  | 126.8(3)  | C19  | C18  | C22  | 125.9(3)  |
| Ti1  | C19  | C18  | 72.64(19) | Ti1  | C19  | C20  | 70.02(18) |
| Ti1  | C19  | C23  | 125.2(2)  | C18  | C19  | C20  | 107.5(3)  |
| C18  | C19  | C23  | 127.2(3)  | C20  | C19  | C23  | 125.2(3)  |
| Ti1  | C20  | C16  | 72.64(19) | Ti1  | C20  | C19  | 75.14(19) |
| C16  | C20  | C19  | 109.3(3)  | N1   | C24  | C25  | 111.8(3)  |
| C24  | C25  | C26  | 121.6(3)  | C24  | C25  | C30  | 119.6(3)  |
| C26  | C25  | C30  | 118.8(3)  | O2   | C26  | C25  | 117.3(3)  |
| O2   | C26  | C27  | 121.1(3)  | C25  | C26  | C27  | 121.5(3)  |



Table S12-6. Bond angles ( $^{\circ}$ ) (continued)

| atom | atom | atom | angle     | atom | atom | atom | angle     |
|------|------|------|-----------|------|------|------|-----------|
| C26  | C27  | C28  | 116.4(3)  | C26  | C27  | C31  | 122.5(3)  |
| C28  | C27  | C31  | 121.1(3)  | C27  | C28  | C29  | 124.0(3)  |
| C28  | C29  | C30  | 116.9(3)  | C28  | C29  | C35  | 123.1(3)  |
| C30  | C29  | C35  | 119.9(3)  | C25  | C30  | C29  | 122.2(3)  |
| C27  | C31  | C32  | 109.7(3)  | C27  | C31  | C33  | 111.9(3)  |
| C27  | C31  | C34  | 109.5(3)  | C32  | C31  | C33  | 107.9(3)  |
| C32  | C31  | C34  | 110.8(3)  | C33  | C31  | C34  | 107.0(3)  |
| C29  | C35  | C36  | 107.3(3)  | C29  | C35  | C37  | 112.4(3)  |
| C29  | C35  | C38  | 111.4(3)  | C36  | C35  | C37  | 109.6(3)  |
| C36  | C35  | C38  | 108.8(3)  | C37  | C35  | C38  | 107.3(3)  |
| Ti2  | C39  | C40  | 70.81(18) | Ti2  | C39  | C43  | 73.15(19) |
| Ti2  | C39  | C44  | 124.2(2)  | C40  | C39  | C43  | 107.6(3)  |
| C40  | C39  | C44  | 126.7(3)  | C43  | C39  | C44  | 125.6(3)  |
| Ti2  | C40  | C39  | 74.12(19) | Ti2  | C40  | C41  | 75.16(19) |
| C39  | C40  | C41  | 109.0(3)  | Ti2  | C41  | C40  | 69.86(19) |
| Ti2  | C41  | C42  | 72.0(2)   | Ti2  | C41  | C45  | 125.8(2)  |
| C40  | C41  | C42  | 106.4(3)  | C40  | C41  | C45  | 126.1(3)  |
| C42  | C41  | C45  | 127.4(3)  | Ti2  | C42  | C41  | 73.7(2)   |
| Ti2  | C42  | C43  | 73.0(2)   | C41  | C42  | C43  | 109.5(3)  |
| Ti2  | C43  | C39  | 72.23(19) | Ti2  | C43  | C42  | 72.3(2)   |
| Ti2  | C43  | C46  | 124.3(2)  | C39  | C43  | C42  | 107.3(3)  |
| C39  | C43  | C46  | 126.8(3)  | C42  | C43  | C46  | 125.8(3)  |
| N1   | C47  | C48  | 114.0(2)  | C47  | C48  | C49  | 119.0(3)  |
| C47  | C48  | C53  | 121.8(3)  | C49  | C48  | C53  | 119.2(3)  |
| O3   | C49  | C48  | 116.8(3)  | O3   | C49  | C50  | 121.7(3)  |
| C48  | C49  | C50  | 121.5(3)  | C49  | C50  | C51  | 116.3(3)  |
| C49  | C50  | C54  | 122.8(3)  | C51  | C50  | C54  | 120.9(3)  |
| C50  | C51  | C52  | 124.2(3)  | C51  | C52  | C53  | 117.0(3)  |
| C51  | C52  | C58  | 123.4(3)  | C53  | C52  | C58  | 119.6(3)  |
| C48  | C53  | C52  | 121.7(3)  | C50  | C54  | C55  | 109.6(3)  |
| C50  | C54  | C56  | 112.3(3)  | C50  | C54  | C57  | 109.6(3)  |
| C55  | C54  | C56  | 107.3(3)  | C55  | C54  | C57  | 110.9(3)  |
| C56  | C54  | C57  | 107.2(3)  | C52  | C58  | C59  | 108.5(3)  |
| C52  | C58  | C60  | 111.1(3)  | C52  | C58  | C61  | 111.6(3)  |
| C59  | C58  | C60  | 108.9(3)  | C59  | C58  | C61  | 108.3(3)  |
| C60  | C58  | C61  | 108.3(3)  | Ti3  | C62  | C63  | 71.2(2)   |
| Ti3  | C62  | C66  | 72.9(2)   | Ti3  | C62  | C67  | 122.2(2)  |

Table S12-6. Bond angles ( $^{\circ}$ ) (continued)

| atom | atom | atom | angle    | atom | atom | atom | angle    |
|------|------|------|----------|------|------|------|----------|
| C63  | C62  | C66  | 106.7(3) | C63  | C62  | C67  | 126.1(3) |
| C66  | C62  | C67  | 127.2(4) | Ti3  | C63  | C62  | 73.8(2)  |
| Ti3  | C63  | C64  | 75.9(2)  | C62  | C63  | C64  | 110.3(3) |
| Ti3  | C64  | C63  | 69.5(2)  | Ti3  | C64  | C65  | 71.5(2)  |
| Ti3  | C64  | C68  | 126.0(3) | C63  | C64  | C65  | 105.9(3) |
| C63  | C64  | C68  | 127.6(3) | C65  | C64  | C68  | 126.5(3) |
| Ti3  | C65  | C64  | 74.3(2)  | Ti3  | C65  | C66  | 72.5(2)  |
| C64  | C65  | C66  | 109.4(3) | Ti3  | C66  | C62  | 72.3(2)  |
| Ti3  | C66  | C65  | 72.7(2)  | Ti3  | C66  | C69  | 124.7(3) |
| C62  | C66  | C65  | 107.6(3) | C62  | C66  | C69  | 127.6(3) |
| C65  | C66  | C69  | 124.6(3) |      |      |      |          |

Table S12-7. Bond angles involving hydrogens (°)

| atom | atom | atom | angle | atom | atom | atom | angle |
|------|------|------|-------|------|------|------|-------|
| N1   | C1   | H1A  | 109.1 | N1   | C1   | H1B  | 109.1 |
| C2   | C1   | H1A  | 109.1 | C2   | C1   | H1B  | 109.1 |
| H1A  | C1   | H1B  | 107.9 | C4   | C5   | H5   | 117.9 |
| C6   | C5   | H5   | 117.9 | C2   | C7   | H7   | 118.9 |
| C6   | C7   | H7   | 118.9 | C8   | C9   | H9A  | 109.5 |
| C8   | C9   | H9B  | 109.5 | C8   | C9   | H9C  | 109.5 |
| H9A  | C9   | H9B  | 109.5 | H9A  | C9   | H9C  | 109.5 |
| H9B  | C9   | H9C  | 109.5 | C8   | C10  | H10A | 109.5 |
| C8   | C10  | H10B | 109.5 | C8   | C10  | H10C | 109.5 |
| H10A | C10  | H10B | 109.5 | H10A | C10  | H10C | 109.5 |
| H10B | C10  | H10C | 109.5 | C8   | C11  | H11A | 109.5 |
| C8   | C11  | H11B | 109.5 | C8   | C11  | H11C | 109.5 |
| H11A | C11  | H11B | 109.5 | H11A | C11  | H11C | 109.5 |
| H11B | C11  | H11C | 109.5 | C12  | C13  | H13A | 109.5 |
| C12  | C13  | H13B | 109.5 | C12  | C13  | H13C | 109.5 |
| H13A | C13  | H13B | 109.5 | H13A | C13  | H13C | 109.5 |
| H13B | C13  | H13C | 109.5 | C12  | C14  | H14A | 109.5 |
| C12  | C14  | H14B | 109.5 | C12  | C14  | H14C | 109.5 |
| H14A | C14  | H14B | 109.5 | H14A | C14  | H14C | 109.5 |
| H14B | C14  | H14C | 109.5 | C12  | C15  | H15A | 109.5 |
| C12  | C15  | H15B | 109.5 | C12  | C15  | H15C | 109.5 |
| H15A | C15  | H15B | 109.5 | H15A | C15  | H15C | 109.5 |
| H15B | C15  | H15C | 109.5 | Ti1  | C17  | H17  | 125.0 |
| C16  | C17  | H17  | 125.0 | C18  | C17  | H17  | 125.0 |
| Ti1  | C20  | H20  | 125.1 | C16  | C20  | H20  | 125.1 |
| C19  | C20  | H20  | 125.1 | C16  | C21  | H21A | 109.5 |
| C16  | C21  | H21B | 109.5 | C16  | C21  | H21C | 109.5 |
| H21A | C21  | H21B | 109.5 | H21A | C21  | H21C | 109.5 |
| H21B | C21  | H21C | 109.5 | C18  | C22  | H22A | 109.5 |
| C18  | C22  | H22B | 109.5 | C18  | C22  | H22C | 109.5 |
| H22A | C22  | H22B | 109.5 | H22A | C22  | H22C | 109.5 |
| H22B | C22  | H22C | 109.5 | C19  | C23  | H23A | 109.5 |
| C19  | C23  | H23B | 109.5 | C19  | C23  | H23C | 109.5 |
| H23A | C23  | H23B | 109.5 | H23A | C23  | H23C | 109.5 |
| H23B | C23  | H23C | 109.5 | N1   | C24  | H24A | 109.3 |
| N1   | C24  | H24B | 109.3 | C25  | C24  | H24A | 109.3 |
| C25  | C24  | H24B | 109.3 | H24A | C24  | H24B | 107.9 |

Table S12-7. Bond angles involving hydrogens ( $^{\circ}$ ) (continued)

| atom | atom | atom | angle | atom | atom | atom | angle |
|------|------|------|-------|------|------|------|-------|
| C27  | C28  | H28  | 118.0 | C29  | C28  | H28  | 118.0 |
| C25  | C30  | H30  | 118.9 | C29  | C30  | H30  | 118.9 |
| C31  | C32  | H32A | 109.5 | C31  | C32  | H32B | 109.5 |
| C31  | C32  | H32C | 109.5 | H32A | C32  | H32B | 109.5 |
| H32A | C32  | H32C | 109.4 | H32B | C32  | H32C | 109.5 |
| C31  | C33  | H33A | 109.5 | C31  | C33  | H33B | 109.5 |
| C31  | C33  | H33C | 109.5 | H33A | C33  | H33B | 109.5 |
| H33A | C33  | H33C | 109.5 | H33B | C33  | H33C | 109.5 |
| C31  | C34  | H34A | 109.5 | C31  | C34  | H34B | 109.5 |
| C31  | C34  | H34C | 109.5 | H34A | C34  | H34B | 109.5 |
| H34A | C34  | H34C | 109.5 | H34B | C34  | H34C | 109.5 |
| C35  | C36  | H36A | 109.5 | C35  | C36  | H36B | 109.5 |
| C35  | C36  | H36C | 109.5 | H36A | C36  | H36B | 109.5 |
| H36A | C36  | H36C | 109.5 | H36B | C36  | H36C | 109.5 |
| C35  | C37  | H37A | 109.5 | C35  | C37  | H37B | 109.5 |
| C35  | C37  | H37C | 109.5 | H37A | C37  | H37B | 109.5 |
| H37A | C37  | H37C | 109.5 | H37B | C37  | H37C | 109.5 |
| C35  | C38  | H38A | 109.5 | C35  | C38  | H38B | 109.5 |
| C35  | C38  | H38C | 109.5 | H38A | C38  | H38B | 109.5 |
| H38A | C38  | H38C | 109.5 | H38B | C38  | H38C | 109.5 |
| Ti2  | C40  | H40  | 125.1 | C39  | C40  | H40  | 125.1 |
| C41  | C40  | H40  | 125.1 | Ti2  | C42  | H42  | 125.1 |
| C41  | C42  | H42  | 125.1 | C43  | C42  | H42  | 125.1 |
| C39  | C44  | H44A | 109.5 | C39  | C44  | H44B | 109.5 |
| C39  | C44  | H44C | 109.5 | H44A | C44  | H44B | 109.5 |
| H44A | C44  | H44C | 109.5 | H44B | C44  | H44C | 109.5 |
| C41  | C45  | H45A | 109.5 | C41  | C45  | H45B | 109.5 |
| C41  | C45  | H45C | 109.5 | H45A | C45  | H45B | 109.5 |
| H45A | C45  | H45C | 109.5 | H45B | C45  | H45C | 109.5 |
| C43  | C46  | H46A | 109.5 | C43  | C46  | H46B | 109.5 |
| C43  | C46  | H46C | 109.5 | H46A | C46  | H46B | 109.5 |
| H46A | C46  | H46C | 109.5 | H46B | C46  | H46C | 109.5 |
| N1   | C47  | H47A | 108.7 | N1   | C47  | H47B | 108.7 |
| C48  | C47  | H47A | 108.8 | C48  | C47  | H47B | 108.8 |
| H47A | C47  | H47B | 107.7 | C50  | C51  | H51  | 117.9 |
| C52  | C51  | H51  | 117.9 | C48  | C53  | H53  | 119.1 |
| C52  | C53  | H53  | 119.1 | C54  | C55  | H55A | 109.5 |

Table S12-7. Bond angles involving hydrogens ( $^{\circ}$ ) (continued)

| atom | atom | atom | angle | atom | atom | atom | angle |
|------|------|------|-------|------|------|------|-------|
| C54  | C55  | H55B | 109.5 | C54  | C55  | H55C | 109.5 |
| H55A | C55  | H55B | 109.5 | H55A | C55  | H55C | 109.5 |
| H55B | C55  | H55C | 109.5 | C54  | C56  | H56A | 109.5 |
| C54  | C56  | H56B | 109.5 | C54  | C56  | H56C | 109.5 |
| H56A | C56  | H56B | 109.5 | H56A | C56  | H56C | 109.5 |
| H56B | C56  | H56C | 109.5 | C54  | C57  | H57A | 109.5 |
| C54  | C57  | H57B | 109.5 | C54  | C57  | H57C | 109.5 |
| H57A | C57  | H57B | 109.5 | H57A | C57  | H57C | 109.5 |
| H57B | C57  | H57C | 109.5 | C58  | C59  | H59A | 109.5 |
| C58  | C59  | H59B | 109.5 | C58  | C59  | H59C | 109.5 |
| H59A | C59  | H59B | 109.5 | H59A | C59  | H59C | 109.5 |
| H59B | C59  | H59C | 109.5 | C58  | C60  | H60A | 109.5 |
| C58  | C60  | H60B | 109.5 | C58  | C60  | H60C | 109.5 |
| H60A | C60  | H60B | 109.5 | H60A | C60  | H60C | 109.5 |
| H60B | C60  | H60C | 109.5 | C58  | C61  | H61A | 109.5 |
| C58  | C61  | H61B | 109.5 | C58  | C61  | H61C | 109.5 |
| H61A | C61  | H61B | 109.5 | H61A | C61  | H61C | 109.5 |
| H61B | C61  | H61C | 109.5 | Ti3  | C63  | H63  | 124.5 |
| C62  | C63  | H63  | 124.5 | C64  | C63  | H63  | 124.5 |
| Ti3  | C65  | H65  | 125.1 | C64  | C65  | H65  | 125.1 |
| C66  | C65  | H65  | 125.1 | C62  | C67  | H67A | 109.5 |
| C62  | C67  | H67B | 109.5 | C62  | C67  | H67C | 109.5 |
| H67A | C67  | H67B | 109.5 | H67A | C67  | H67C | 109.5 |
| H67B | C67  | H67C | 109.5 | C64  | C68  | H68A | 109.5 |
| C64  | C68  | H68B | 109.5 | C64  | C68  | H68C | 109.5 |
| H68A | C68  | H68B | 109.5 | H68A | C68  | H68C | 109.5 |
| H68B | C68  | H68C | 109.5 | C66  | C69  | H69A | 109.5 |
| C66  | C69  | H69B | 109.5 | C66  | C69  | H69C | 109.5 |
| H69A | C69  | H69B | 109.5 | H69A | C69  | H69C | 109.5 |
| H69B | C69  | H69C | 109.5 |      |      |      |       |

Table S12-8. Torsion Angles(°)

(Those having bond angles &gt; 160 or &lt; 20 degrees are excluded.)

| atom1 | atom2 | atom3 | atom4 | angle       | atom1 | atom2 | atom3 | atom4 | angle       |
|-------|-------|-------|-------|-------------|-------|-------|-------|-------|-------------|
| Cl1   | Ti1   | C16   | C17   | -21.44(16)  | Cl1   | Ti1   | C16   | C20   | -136.08(10) |
| Cl1   | Ti1   | C16   | C21   | 100.4(2)    | Cl1   | Ti1   | C17   | C16   | 162.33(12)  |
| Cl1   | Ti1   | C17   | C18   | -81.53(13)  | Cl1   | Ti1   | C18   | C17   | 97.43(13)   |
| Cl1   | Ti1   | C18   | C19   | -146.45(12) | Cl1   | Ti1   | C18   | C22   | -23.9(2)    |
| Cl1   | Ti1   | C19   | C18   | 37.05(14)   | Cl1   | Ti1   | C19   | C20   | 153.72(9)   |
| Cl1   | Ti1   | C19   | C23   | -86.6(2)    | Cl1   | Ti1   | C20   | C16   | 73.72(18)   |
| Cl1   | Ti1   | C20   | C19   | -42.5(2)    | Cl2   | Ti1   | C16   | C17   | 126.43(11)  |
| Cl2   | Ti1   | C16   | C20   | 11.79(18)   | Cl2   | Ti1   | C16   | C21   | -111.7(2)   |
| Cl2   | Ti1   | C17   | C16   | -88.50(16)  | Cl2   | Ti1   | C17   | C18   | 27.6(2)     |
| Cl2   | Ti1   | C18   | C17   | -162.21(10) | Cl2   | Ti1   | C18   | C19   | -46.09(14)  |
| Cl2   | Ti1   | C18   | C22   | 76.4(2)     | Cl2   | Ti1   | C19   | C18   | 136.67(12)  |
| Cl2   | Ti1   | C19   | C20   | -106.66(12) | Cl2   | Ti1   | C19   | C23   | 13.0(2)     |
| Cl2   | Ti1   | C20   | C16   | -170.86(12) | Cl2   | Ti1   | C20   | C19   | 72.95(12)   |
| O1    | Ti1   | C16   | C17   | -126.91(14) | O1    | Ti1   | C16   | C20   | 118.45(14)  |
| O1    | Ti1   | C16   | C21   | -5.1(2)     | O1    | Ti1   | C17   | C16   | 57.38(16)   |
| O1    | Ti1   | C17   | C18   | 173.52(13)  | O1    | Ti1   | C18   | C17   | -10.3(3)    |
| O1    | Ti1   | C18   | C19   | 105.80(19)  | O1    | Ti1   | C18   | C22   | -131.7(2)   |
| O1    | Ti1   | C19   | C18   | -118.52(16) | O1    | Ti1   | C19   | C20   | -1.8(2)     |
| O1    | Ti1   | C19   | C23   | 117.8(2)    | O1    | Ti1   | C20   | C16   | -65.06(15)  |
| O1    | Ti1   | C20   | C19   | 178.75(12)  | C16   | Ti1   | C17   | C16   | -0.00(13)   |
| C16   | Ti1   | C17   | C18   | 116.1(2)    | C17   | Ti1   | C16   | C17   | -0.00(14)   |
| C17   | Ti1   | C16   | C20   | -114.6(2)   | C17   | Ti1   | C16   | C21   | 121.8(3)    |
| C16   | Ti1   | C18   | C17   | -37.10(13)  | C16   | Ti1   | C18   | C19   | 79.02(16)   |
| C16   | Ti1   | C18   | C22   | -158.5(3)   | C18   | Ti1   | C16   | C17   | 37.46(12)   |
| C18   | Ti1   | C16   | C20   | -77.18(15)  | C18   | Ti1   | C16   | C21   | 159.3(3)    |
| C16   | Ti1   | C19   | C18   | -79.27(15)  | C16   | Ti1   | C19   | C20   | 37.41(13)   |
| C16   | Ti1   | C19   | C23   | 157.0(3)    | C19   | Ti1   | C16   | C17   | 77.58(15)   |
| C19   | Ti1   | C16   | C20   | -37.07(13)  | C19   | Ti1   | C16   | C21   | -160.6(3)   |
| C16   | Ti1   | C20   | C16   | -0.00(14)   | C16   | Ti1   | C20   | C19   | -116.2(2)   |
| C20   | Ti1   | C16   | C17   | 114.6(2)    | C20   | Ti1   | C16   | C20   | 0.00(14)    |
| C20   | Ti1   | C16   | C21   | -123.5(3)   | C17   | Ti1   | C18   | C17   | 0.00(15)    |
| C17   | Ti1   | C18   | C19   | 116.1(3)    | C17   | Ti1   | C18   | C22   | -121.4(3)   |
| C18   | Ti1   | C17   | C16   | -116.1(3)   | C18   | Ti1   | C17   | C18   | 0.00(15)    |
| C17   | Ti1   | C19   | C18   | -37.84(13)  | C17   | Ti1   | C19   | C20   | 78.83(15)   |
| C17   | Ti1   | C19   | C23   | -161.5(3)   | C19   | Ti1   | C17   | C16   | -79.72(16)  |
| C19   | Ti1   | C17   | C18   | 36.42(13)   | C17   | Ti1   | C20   | C16   | 37.92(13)   |
| C17   | Ti1   | C20   | C19   | -78.26(15)  | C20   | Ti1   | C17   | C16   | -38.22(13)  |

Table S12-8. Torsion angles ( $^{\circ}$ ) (continued)

| atom1 | atom2 | atom3 | atom4 | angle       | atom1 | atom2 | atom3 | atom4 | angle       |
|-------|-------|-------|-------|-------------|-------|-------|-------|-------|-------------|
| C20   | Ti1   | C17   | C18   | 77.92(15)   | C18   | Ti1   | C19   | C18   | 0.00(14)    |
| C18   | Ti1   | C19   | C20   | 116.7(2)    | C18   | Ti1   | C19   | C23   | -123.7(3)   |
| C19   | Ti1   | C18   | C17   | -116.1(2)   | C19   | Ti1   | C18   | C19   | -0.00(13)   |
| C19   | Ti1   | C18   | C22   | 122.5(3)    | C18   | Ti1   | C20   | C16   | 79.91(15)   |
| C18   | Ti1   | C20   | C19   | -36.27(12)  | C20   | Ti1   | C18   | C17   | -78.85(15)  |
| C20   | Ti1   | C18   | C19   | 37.27(12)   | C20   | Ti1   | C18   | C22   | 159.8(3)    |
| C19   | Ti1   | C20   | C16   | 116.2(2)    | C19   | Ti1   | C20   | C19   | -0.00(14)   |
| C20   | Ti1   | C19   | C18   | -116.7(2)   | C20   | Ti1   | C19   | C20   | -0.00(14)   |
| C20   | Ti1   | C19   | C23   | 119.6(3)    | Cl3   | Ti2   | C39   | C40   | 7.68(19)    |
| Cl3   | Ti2   | C39   | C43   | 123.84(11)  | Cl3   | Ti2   | C39   | C44   | -114.2(2)   |
| Cl3   | Ti2   | C40   | C39   | -174.22(11) | Cl3   | Ti2   | C40   | C41   | 70.59(13)   |
| Cl3   | Ti2   | C41   | C40   | -109.78(12) | Cl3   | Ti2   | C41   | C42   | 134.33(12)  |
| Cl3   | Ti2   | C41   | C45   | 10.8(2)     | Cl3   | Ti2   | C42   | C41   | -48.61(14)  |
| Cl3   | Ti2   | C42   | C43   | -165.56(9)  | Cl3   | Ti2   | C43   | C39   | -93.08(16)  |
| Cl3   | Ti2   | C43   | C42   | 22.3(2)     | Cl3   | Ti2   | C43   | C46   | 144.09(15)  |
| Cl4   | Ti2   | C39   | C40   | -139.20(9)  | Cl4   | Ti2   | C39   | C43   | -23.04(18)  |
| Cl4   | Ti2   | C39   | C44   | 98.9(2)     | Cl4   | Ti2   | C40   | C39   | 67.5(2)     |
| Cl4   | Ti2   | C40   | C41   | -47.7(2)    | Cl4   | Ti2   | C41   | C40   | 150.49(9)   |
| Cl4   | Ti2   | C41   | C42   | 34.61(15)   | Cl4   | Ti2   | C41   | C45   | -88.9(2)    |
| Cl4   | Ti2   | C42   | C41   | -148.87(13) | Cl4   | Ti2   | C42   | C43   | 94.18(12)   |
| Cl4   | Ti2   | C43   | C39   | 160.45(13)  | Cl4   | Ti2   | C43   | C42   | -84.13(11)  |
| Cl4   | Ti2   | C43   | C46   | 37.6(2)     | O2    | Ti2   | C39   | C40   | 114.94(14)  |
| O2    | Ti2   | C39   | C43   | -128.90(15) | O2    | Ti2   | C39   | C44   | -6.9(2)     |
| O2    | Ti2   | C40   | C39   | -68.37(14)  | O2    | Ti2   | C40   | C41   | 176.44(12)  |
| O2    | Ti2   | C41   | C40   | -5.2(2)     | O2    | Ti2   | C41   | C42   | -121.06(15) |
| O2    | Ti2   | C41   | C45   | 115.4(2)    | O2    | Ti2   | C42   | C41   | 102.7(2)    |
| O2    | Ti2   | C42   | C43   | -14.3(2)    | O2    | Ti2   | C43   | C39   | 55.69(16)   |
| O2    | Ti2   | C43   | C42   | 171.11(11)  | O2    | Ti2   | C43   | C46   | -67.1(2)    |
| C39   | Ti2   | C40   | C39   | -0.00(14)   | C39   | Ti2   | C40   | C41   | -115.2(2)   |
| C40   | Ti2   | C39   | C40   | 0.00(14)    | C40   | Ti2   | C39   | C43   | 116.2(3)    |
| C40   | Ti2   | C39   | C44   | -121.9(3)   | C39   | Ti2   | C41   | C40   | 37.83(12)   |
| C39   | Ti2   | C41   | C42   | -78.06(15)  | C39   | Ti2   | C41   | C45   | 158.4(3)    |
| C41   | Ti2   | C39   | C40   | -37.73(13)  | C41   | Ti2   | C39   | C43   | 78.43(16)   |
| C41   | Ti2   | C39   | C44   | -159.6(3)   | C39   | Ti2   | C42   | C41   | 79.49(15)   |
| C39   | Ti2   | C42   | C43   | -37.46(12)  | C42   | Ti2   | C39   | C40   | -78.54(16)  |
| C42   | Ti2   | C39   | C43   | 37.62(13)   | C42   | Ti2   | C39   | C44   | 159.6(3)    |
| C39   | Ti2   | C43   | C39   | 0.00(15)    | C39   | Ti2   | C43   | C42   | 115.4(3)    |

Table S12-8. Torsion angles ( $^{\circ}$ ) (continued)

| atom1 | atom2 | atom3 | atom4 | angle       | atom1 | atom2 | atom3 | atom4 | angle       |
|-------|-------|-------|-------|-------------|-------|-------|-------|-------|-------------|
| C39   | Ti2   | C43   | C46   | -122.8(3)   | C43   | Ti2   | C39   | C40   | -116.2(3)   |
| C43   | Ti2   | C39   | C43   | -0.00(15)   | C43   | Ti2   | C39   | C44   | 122.0(3)    |
| C40   | Ti2   | C41   | C40   | 0.00(14)    | C40   | Ti2   | C41   | C42   | -115.9(2)   |
| C40   | Ti2   | C41   | C45   | 120.6(3)    | C41   | Ti2   | C40   | C39   | 115.2(2)    |
| C41   | Ti2   | C40   | C41   | 0.00(14)    | C40   | Ti2   | C42   | C41   | 37.65(13)   |
| C40   | Ti2   | C42   | C43   | -79.30(15)  | C42   | Ti2   | C40   | C39   | 78.29(16)   |
| C42   | Ti2   | C40   | C41   | -36.90(13)  | C40   | Ti2   | C43   | C39   | -37.45(13)  |
| C40   | Ti2   | C43   | C42   | 77.97(15)   | C40   | Ti2   | C43   | C46   | -160.3(3)   |
| C43   | Ti2   | C40   | C39   | 36.95(13)   | C43   | Ti2   | C40   | C41   | -78.24(15)  |
| C41   | Ti2   | C42   | C41   | 0.00(14)    | C41   | Ti2   | C42   | C43   | -117.0(2)   |
| C42   | Ti2   | C41   | C40   | 115.9(2)    | C42   | Ti2   | C41   | C42   | -0.00(14)   |
| C42   | Ti2   | C41   | C45   | -123.5(3)   | C41   | Ti2   | C43   | C39   | -79.00(15)  |
| C41   | Ti2   | C43   | C42   | 36.42(12)   | C41   | Ti2   | C43   | C46   | 158.2(3)    |
| C43   | Ti2   | C41   | C40   | 78.97(15)   | C43   | Ti2   | C41   | C42   | -36.92(12)  |
| C43   | Ti2   | C41   | C45   | -160.5(3)   | C42   | Ti2   | C43   | C39   | -115.4(2)   |
| C42   | Ti2   | C43   | C42   | -0.00(14)   | C42   | Ti2   | C43   | C46   | 121.7(3)    |
| C43   | Ti2   | C42   | C41   | 117.0(2)    | C43   | Ti2   | C42   | C43   | -0.00(13)   |
| Cl5   | Ti3   | C62   | C63   | -140.25(10) | Cl5   | Ti3   | C62   | C66   | -25.29(18)  |
| Cl5   | Ti3   | C62   | C67   | 98.3(2)     | Cl5   | Ti3   | C63   | C62   | 64.7(2)     |
| Cl5   | Ti3   | C63   | C64   | -51.8(3)    | Cl5   | Ti3   | C64   | C63   | 147.62(11)  |
| Cl5   | Ti3   | C64   | C65   | 31.92(18)   | Cl5   | Ti3   | C64   | C68   | -90.2(2)    |
| Cl5   | Ti3   | C65   | C64   | -151.46(14) | Cl5   | Ti3   | C65   | C66   | 91.80(14)   |
| Cl5   | Ti3   | C66   | C62   | 158.20(14)  | Cl5   | Ti3   | C66   | C65   | -86.19(14)  |
| Cl5   | Ti3   | C66   | C69   | 34.3(2)     | Cl6   | Ti3   | C62   | C63   | 6.91(19)    |
| Cl6   | Ti3   | C62   | C66   | 121.87(12)  | Cl6   | Ti3   | C62   | C67   | -114.5(2)   |
| Cl6   | Ti3   | C63   | C62   | -174.87(12) | Cl6   | Ti3   | C63   | C64   | 68.69(15)   |
| Cl6   | Ti3   | C64   | C63   | -112.00(14) | Cl6   | Ti3   | C64   | C65   | 132.31(14)  |
| Cl6   | Ti3   | C64   | C68   | 10.2(2)     | Cl6   | Ti3   | C65   | C64   | -50.50(16)  |
| Cl6   | Ti3   | C65   | C66   | -167.24(11) | Cl6   | Ti3   | C66   | C62   | -96.04(17)  |
| Cl6   | Ti3   | C66   | C65   | 19.6(2)     | Cl6   | Ti3   | C66   | C69   | 140.09(17)  |
| O3    | Ti3   | C62   | C63   | 114.86(14)  | O3    | Ti3   | C62   | C66   | -130.18(15) |
| O3    | Ti3   | C62   | C67   | -6.6(2)     | O3    | Ti3   | C63   | C62   | -69.51(16)  |
| O3    | Ti3   | C63   | C64   | 174.05(15)  | O3    | Ti3   | C64   | C63   | -8.8(3)     |
| O3    | Ti3   | C64   | C65   | -124.45(17) | O3    | Ti3   | C64   | C68   | 113.5(2)    |
| O3    | Ti3   | C65   | C64   | 101.8(2)    | O3    | Ti3   | C65   | C66   | -14.9(3)    |
| O3    | Ti3   | C66   | C62   | 55.53(18)   | O3    | Ti3   | C66   | C65   | 171.13(13)  |
| O3    | Ti3   | C66   | C69   | -68.3(3)    | C62   | Ti3   | C63   | C62   | 0.00(14)    |



Table S12-8. Torsion angles ( $^{\circ}$ ) (continued)

| atom1 | atom2 | atom3 | atom4 | angle      | atom1 | atom2 | atom3 | atom4 | angle      |
|-------|-------|-------|-------|------------|-------|-------|-------|-------|------------|
| C62   | Ti3   | C63   | C64   | -116.4(3)  | C63   | Ti3   | C62   | C63   | 0.00(15)   |
| C63   | Ti3   | C62   | C66   | 115.0(3)   | C63   | Ti3   | C62   | C67   | -121.4(3)  |
| C62   | Ti3   | C64   | C63   | 37.23(14)  | C62   | Ti3   | C64   | C65   | -78.46(17) |
| C62   | Ti3   | C64   | C68   | 159.4(3)   | C64   | Ti3   | C62   | C63   | -36.83(13) |
| C64   | Ti3   | C62   | C66   | 78.13(16)  | C64   | Ti3   | C62   | C67   | -158.2(3)  |
| C62   | Ti3   | C65   | C64   | 79.28(17)  | C62   | Ti3   | C65   | C66   | -37.46(14) |
| C65   | Ti3   | C62   | C63   | -77.45(16) | C65   | Ti3   | C62   | C66   | 37.51(14)  |
| C65   | Ti3   | C62   | C67   | 161.1(3)   | C62   | Ti3   | C66   | C62   | 0.00(16)   |
| C62   | Ti3   | C66   | C65   | 115.6(3)   | C62   | Ti3   | C66   | C69   | -123.9(4)  |
| C66   | Ti3   | C62   | C63   | -115.0(3)  | C66   | Ti3   | C62   | C66   | 0.00(16)   |
| C66   | Ti3   | C62   | C67   | 123.6(4)   | C63   | Ti3   | C64   | C63   | -0.00(18)  |
| C63   | Ti3   | C64   | C65   | -115.7(3)  | C63   | Ti3   | C64   | C68   | 122.2(4)   |
| C64   | Ti3   | C63   | C62   | 116.4(3)   | C64   | Ti3   | C63   | C64   | 0.00(17)   |
| C63   | Ti3   | C65   | C64   | 37.53(15)  | C63   | Ti3   | C65   | C66   | -79.21(18) |
| C65   | Ti3   | C63   | C62   | 79.36(17)  | C65   | Ti3   | C63   | C64   | -37.08(15) |
| C63   | Ti3   | C66   | C62   | -37.96(14) | C63   | Ti3   | C66   | C65   | 77.65(17)  |
| C63   | Ti3   | C66   | C69   | -161.8(3)  | C66   | Ti3   | C63   | C62   | 37.75(14)  |
| C66   | Ti3   | C63   | C64   | -78.69(17) | C64   | Ti3   | C65   | C64   | -0.00(16)  |
| C64   | Ti3   | C65   | C66   | -116.7(3)  | C65   | Ti3   | C64   | C63   | 115.7(3)   |
| C65   | Ti3   | C64   | C65   | -0.00(16)  | C65   | Ti3   | C64   | C68   | -122.1(4)  |
| C64   | Ti3   | C66   | C62   | -79.17(17) | C64   | Ti3   | C66   | C65   | 36.43(14)  |
| C64   | Ti3   | C66   | C69   | 157.0(3)   | C66   | Ti3   | C64   | C63   | 78.57(18)  |
| C66   | Ti3   | C64   | C65   | -37.12(14) | C66   | Ti3   | C64   | C68   | -159.2(3)  |
| C65   | Ti3   | C66   | C62   | -115.6(3)  | C65   | Ti3   | C66   | C65   | -0.00(16)  |
| C65   | Ti3   | C66   | C69   | 120.5(4)   | C66   | Ti3   | C65   | C64   | 116.7(3)   |
| C66   | Ti3   | C65   | C66   | -0.00(16)  | C1    | N1    | C24   | C25   | -165.3(2)  |
| C24   | N1    | C1    | C2    | 72.6(3)    | C1    | N1    | C47   | C48   | 83.4(3)    |
| C47   | N1    | C1    | C2    | -165.2(2)  | C24   | N1    | C47   | C48   | -154.4(2)  |
| C47   | N1    | C24   | C25   | 72.1(3)    | N1    | C1    | C2    | C3    | -156.8(2)  |
| N1    | C1    | C2    | C7    | 22.1(4)    | C1    | C2    | C3    | O1    | 3.8(4)     |
| C1    | C2    | C3    | C4    | -178.9(2)  | C1    | C2    | C7    | C6    | -178.5(2)  |
| C3    | C2    | C7    | C6    | 0.4(4)     | C7    | C2    | C3    | O1    | -175.2(2)  |
| C7    | C2    | C3    | C4    | 2.2(4)     | O1    | C3    | C4    | C5    | 174.9(2)   |
| O1    | C3    | C4    | C8    | -0.6(4)    | C2    | C3    | C4    | C5    | -2.4(4)    |
| C2    | C3    | C4    | C8    | -177.9(2)  | C3    | C4    | C5    | C6    | 0.0(4)     |
| C3    | C4    | C8    | C9    | 66.8(4)    | C3    | C4    | C8    | C10   | -55.3(4)   |
| C3    | C4    | C8    | C11   | -175.5(3)  | C5    | C4    | C8    | C9    | -108.5(3)  |

Table S12-8. Torsion angles ( $^{\circ}$ ) (continued)

| atom1 | atom2 | atom3 | atom4 | angle      | atom1 | atom2 | atom3 | atom4 | angle      |
|-------|-------|-------|-------|------------|-------|-------|-------|-------|------------|
| C5    | C4    | C8    | C10   | 129.4(3)   | C5    | C4    | C8    | C11   | 9.2(4)     |
| C8    | C4    | C5    | C6    | 175.6(3)   | C4    | C5    | C6    | C7    | 2.4(5)     |
| C4    | C5    | C6    | C12   | -172.4(3)  | C5    | C6    | C7    | C2    | -2.6(4)    |
| C5    | C6    | C12   | C13   | -10.4(4)   | C5    | C6    | C12   | C14   | 107.9(3)   |
| C5    | C6    | C12   | C15   | -133.1(3)  | C7    | C6    | C12   | C13   | 174.9(2)   |
| C7    | C6    | C12   | C14   | -66.7(4)   | C7    | C6    | C12   | C15   | 52.2(4)    |
| C12   | C6    | C7    | C2    | 172.4(2)   | Ti1   | C16   | C17   | Ti1   | 0.000(15)  |
| Ti1   | C16   | C17   | C18   | -66.94(19) | Ti1   | C16   | C20   | Ti1   | 0.000(16)  |
| Ti1   | C16   | C20   | C19   | 66.78(18)  | C17   | C16   | C20   | Ti1   | -64.2(2)   |
| C17   | C16   | C20   | C19   | 2.6(3)     | C20   | C16   | C17   | Ti1   | 64.4(2)    |
| C20   | C16   | C17   | C18   | -2.5(3)    | C21   | C16   | C17   | Ti1   | -118.4(3)  |
| C21   | C16   | C17   | C18   | 174.7(3)   | C21   | C16   | C20   | Ti1   | 118.7(3)   |
| C21   | C16   | C20   | C19   | -174.5(3)  | Ti1   | C17   | C18   | Ti1   | -0.000(14) |
| Ti1   | C17   | C18   | C19   | -64.31(19) | Ti1   | C17   | C18   | C22   | 118.3(3)   |
| C16   | C17   | C18   | Ti1   | 65.8(2)    | C16   | C17   | C18   | C19   | 1.5(4)     |
| C16   | C17   | C18   | C22   | -175.9(3)  | Ti1   | C18   | C19   | Ti1   | 0.000(13)  |
| Ti1   | C18   | C19   | C20   | -61.71(17) | Ti1   | C18   | C19   | C23   | 121.4(3)   |
| C17   | C18   | C19   | Ti1   | 61.9(2)    | C17   | C18   | C19   | C20   | 0.2(3)     |
| C17   | C18   | C19   | C23   | -176.7(3)  | C22   | C18   | C19   | Ti1   | -120.7(3)  |
| C22   | C18   | C19   | C20   | 177.6(3)   | C22   | C18   | C19   | C23   | 0.7(5)     |
| Ti1   | C19   | C20   | Ti1   | -0.000(12) | Ti1   | C19   | C20   | C16   | -65.16(18) |
| C18   | C19   | C20   | Ti1   | 63.4(2)    | C18   | C19   | C20   | C16   | -1.7(3)    |
| C23   | C19   | C20   | Ti1   | -119.6(3)  | C23   | C19   | C20   | C16   | 175.2(3)   |
| N1    | C24   | C25   | C26   | -153.3(2)  | N1    | C24   | C25   | C30   | 25.2(4)    |
| C24   | C25   | C26   | O2    | -4.1(4)    | C24   | C25   | C26   | C27   | 174.1(3)   |
| C24   | C25   | C30   | C29   | -177.0(3)  | C26   | C25   | C30   | C29   | 1.4(5)     |
| C30   | C25   | C26   | O2    | 177.5(3)   | C30   | C25   | C26   | C27   | -4.3(4)    |
| O2    | C26   | C27   | C28   | -178.1(2)  | O2    | C26   | C27   | C31   | 2.2(4)     |
| C25   | C26   | C27   | C28   | 3.7(4)     | C25   | C26   | C27   | C31   | -175.9(3)  |
| C26   | C27   | C28   | C29   | -0.4(5)    | C26   | C27   | C31   | C32   | -63.3(4)   |
| C26   | C27   | C31   | C33   | 177.1(3)   | C26   | C27   | C31   | C34   | 58.5(4)    |
| C28   | C27   | C31   | C32   | 117.1(3)   | C28   | C27   | C31   | C33   | -2.6(4)    |
| C28   | C27   | C31   | C34   | -121.1(3)  | C31   | C27   | C28   | C29   | 179.3(3)   |
| C27   | C28   | C29   | C30   | -2.3(5)    | C27   | C28   | C29   | C35   | 176.1(3)   |
| C28   | C29   | C30   | C25   | 1.7(5)     | C28   | C29   | C35   | C36   | -106.2(3)  |
| C28   | C29   | C35   | C37   | 14.4(4)    | C28   | C29   | C35   | C38   | 134.8(3)   |
| C30   | C29   | C35   | C36   | 72.2(4)    | C30   | C29   | C35   | C37   | -167.2(3)  |

Table S12-8. Torsion angles ( $^{\circ}$ ) (continued)

| atom1 | atom2 | atom3 | atom4 | angle      | atom1 | atom2 | atom3 | atom4 | angle      |
|-------|-------|-------|-------|------------|-------|-------|-------|-------|------------|
| C30   | C29   | C35   | C38   | -46.8(4)   | C35   | C29   | C30   | C25   | -176.7(3)  |
| Ti2   | C39   | C40   | Ti2   | 0.000(14)  | Ti2   | C39   | C40   | C41   | 67.69(18)  |
| Ti2   | C39   | C43   | Ti2   | -0.000(14) | Ti2   | C39   | C43   | C42   | -64.27(19) |
| Ti2   | C39   | C43   | C46   | 120.0(3)   | C40   | C39   | C43   | Ti2   | 62.8(2)    |
| C40   | C39   | C43   | C42   | -1.5(4)    | C40   | C39   | C43   | C46   | -177.2(3)  |
| C43   | C39   | C40   | Ti2   | -64.4(2)   | C43   | C39   | C40   | C41   | 3.3(4)     |
| C44   | C39   | C40   | Ti2   | 118.9(4)   | C44   | C39   | C40   | C41   | -173.4(3)  |
| C44   | C39   | C43   | Ti2   | -120.4(4)  | C44   | C39   | C43   | C42   | 175.3(3)   |
| C44   | C39   | C43   | C46   | -0.4(6)    | Ti2   | C40   | C41   | Ti2   | -0.000(17) |
| Ti2   | C40   | C41   | C42   | 63.11(19)  | Ti2   | C40   | C41   | C45   | -120.3(3)  |
| C39   | C40   | C41   | Ti2   | -67.0(2)   | C39   | C40   | C41   | C42   | -3.9(4)    |
| C39   | C40   | C41   | C45   | 172.7(3)   | Ti2   | C41   | C42   | Ti2   | -0.000(14) |
| Ti2   | C41   | C42   | C43   | 64.7(2)    | C40   | C41   | C42   | Ti2   | -61.7(2)   |
| C40   | C41   | C42   | C43   | 3.0(4)     | C45   | C41   | C42   | Ti2   | 121.7(4)   |
| C45   | C41   | C42   | C43   | -173.6(3)  | Ti2   | C42   | C43   | Ti2   | -0.000(12) |
| Ti2   | C42   | C43   | C39   | 64.24(19)  | Ti2   | C42   | C43   | C46   | -120.0(3)  |
| C41   | C42   | C43   | Ti2   | -65.2(3)   | C41   | C42   | C43   | C39   | -1.0(4)    |
| C41   | C42   | C43   | C46   | 174.8(3)   | N1    | C47   | C48   | C49   | 176.8(2)   |
| N1    | C47   | C48   | C53   | -0.9(4)    | C47   | C48   | C49   | O3    | 1.4(4)     |
| C47   | C48   | C49   | C50   | -178.5(3)  | C47   | C48   | C53   | C52   | 179.5(3)   |
| C49   | C48   | C53   | C52   | 1.9(5)     | C53   | C48   | C49   | O3    | 179.1(3)   |
| C53   | C48   | C49   | C50   | -0.8(5)    | O3    | C49   | C50   | C51   | 179.1(3)   |
| O3    | C49   | C50   | C54   | -0.1(5)    | C48   | C49   | C50   | C51   | -1.0(5)    |
| C48   | C49   | C50   | C54   | 179.8(3)   | C49   | C50   | C51   | C52   | 1.8(5)     |
| C49   | C50   | C54   | C55   | 61.4(4)    | C49   | C50   | C54   | C56   | -179.4(3)  |
| C49   | C50   | C54   | C57   | -60.4(4)   | C51   | C50   | C54   | C55   | -117.7(3)  |
| C51   | C50   | C54   | C56   | 1.4(4)     | C51   | C50   | C54   | C57   | 120.4(3)   |
| C54   | C50   | C51   | C52   | -178.9(3)  | C50   | C51   | C52   | C53   | -0.8(5)    |
| C50   | C51   | C52   | C58   | 177.7(3)   | C51   | C52   | C53   | C48   | -1.1(5)    |
| C51   | C52   | C58   | C59   | -106.2(4)  | C51   | C52   | C58   | C60   | 134.1(3)   |
| C51   | C52   | C58   | C61   | 13.2(5)    | C53   | C52   | C58   | C59   | 72.3(4)    |
| C53   | C52   | C58   | C60   | -47.4(4)   | C53   | C52   | C58   | C61   | -168.4(3)  |
| C58   | C52   | C53   | C48   | -179.7(3)  | Ti3   | C62   | C63   | Ti3   | -0.000(17) |
| Ti3   | C62   | C63   | C64   | 67.8(2)    | Ti3   | C62   | C66   | Ti3   | 0.000(17)  |
| Ti3   | C62   | C66   | C65   | -64.6(2)   | Ti3   | C62   | C66   | C69   | 120.6(3)   |
| C63   | C62   | C66   | Ti3   | 63.6(2)    | C63   | C62   | C66   | C65   | -1.0(4)    |
| C63   | C62   | C66   | C69   | -175.8(3)  | C66   | C62   | C63   | Ti3   | -64.8(3)   |

Table S12-8. Torsion angles ( $^{\circ}$ ) (continued)

| atom1 | atom2 | atom3 | atom4 | angle      | atom1 | atom2 | atom3 | atom4 | angle     |
|-------|-------|-------|-------|------------|-------|-------|-------|-------|-----------|
| C66   | C62   | C63   | C64   | 3.0(4)     | C67   | C62   | C63   | Ti3   | 116.6(4)  |
| C67   | C62   | C63   | C64   | -175.6(3)  | C67   | C62   | C66   | Ti3   | -117.8(4) |
| C67   | C62   | C66   | C65   | 177.6(3)   | C67   | C62   | C66   | C69   | 2.8(6)    |
| Ti3   | C63   | C64   | Ti3   | -0.000(19) | Ti3   | C63   | C64   | C65   | 62.6(2)   |
| Ti3   | C63   | C64   | C68   | -120.3(3)  | C62   | C63   | C64   | Ti3   | -66.5(3)  |
| C62   | C63   | C64   | C65   | -3.9(4)    | C62   | C63   | C64   | C68   | 173.2(3)  |
| Ti3   | C64   | C65   | Ti3   | 0.000(17)  | Ti3   | C64   | C65   | C66   | 64.5(2)   |
| C63   | C64   | C65   | Ti3   | -61.3(2)   | C63   | C64   | C65   | C66   | 3.2(4)    |
| C68   | C64   | C65   | Ti3   | 121.5(4)   | C68   | C64   | C65   | C66   | -173.9(3) |
| Ti3   | C65   | C66   | Ti3   | -0.000(17) | Ti3   | C65   | C66   | C62   | 64.3(2)   |
| Ti3   | C65   | C66   | C69   | -120.6(3)  | C64   | C65   | C66   | Ti3   | -65.7(3)  |
| C64   | C65   | C66   | C62   | -1.4(4)    | C64   | C65   | C66   | C69   | 173.6(3)  |

Table S12-9. Intramolecular contacts less than 3.60 Å

| atom | atom | distance | atom | atom | distance |
|------|------|----------|------|------|----------|
| Cl1  | C22  | 3.309(4) | Cl2  | C23  | 3.223(4) |
| Cl3  | C45  | 3.232(4) | Cl4  | C46  | 3.506(4) |
| Cl5  | C69  | 3.438(4) | Cl6  | C68  | 3.256(4) |
| O1   | C1   | 2.811(4) | O1   | C8   | 2.948(4) |
| O1   | C9   | 3.122(4) | O1   | C10  | 3.029(4) |
| O1   | C21  | 3.152(4) | O2   | C24  | 2.825(4) |
| O2   | C31  | 2.943(4) | O2   | C32  | 3.080(4) |
| O2   | C34  | 3.035(4) | O2   | C44  | 3.216(4) |
| O3   | C47  | 2.749(4) | O3   | C54  | 2.962(4) |
| O3   | C55  | 3.083(4) | O3   | C57  | 3.072(5) |
| O3   | C67  | 3.219(5) | N1   | C7   | 2.811(4) |
| N1   | C30  | 2.798(4) | N1   | C53  | 2.830(4) |
| C1   | C20  | 3.563(5) | C1   | C48  | 3.166(5) |
| C1   | C53  | 3.264(5) | C2   | C5   | 2.757(5) |
| C2   | C24  | 3.027(4) | C3   | C6   | 2.795(5) |
| C3   | C9   | 3.123(5) | C3   | C10  | 3.138(5) |
| C3   | C21  | 3.397(5) | C4   | C7   | 2.806(5) |
| C5   | C9   | 3.471(5) | C5   | C11  | 2.835(5) |
| C5   | C13  | 2.908(5) | C5   | C14  | 3.497(5) |
| C7   | C14  | 3.067(5) | C7   | C15  | 2.987(5) |
| C7   | C24  | 3.239(4) | C22  | C23  | 3.178(5) |
| C24  | C40  | 3.478(5) | C25  | C28  | 2.759(5) |
| C25  | C44  | 3.549(5) | C25  | C47  | 3.006(4) |
| C26  | C29  | 2.802(4) | C26  | C32  | 3.134(4) |
| C26  | C34  | 3.095(4) | C26  | C44  | 3.351(5) |
| C27  | C30  | 2.805(4) | C28  | C32  | 3.578(5) |
| C28  | C33  | 2.841(5) | C28  | C36  | 3.459(5) |
| C28  | C37  | 2.897(5) | C30  | C36  | 3.114(5) |
| C30  | C38  | 2.978(5) | C30  | C47  | 3.240(5) |
| C44  | C46  | 3.178(5) | C47  | C63  | 3.573(5) |
| C48  | C51  | 2.760(5) | C49  | C52  | 2.807(4) |
| C49  | C55  | 3.119(5) | C49  | C57  | 3.116(5) |
| C49  | C67  | 3.553(5) | C50  | C53  | 2.811(5) |
| C51  | C55  | 3.574(5) | C51  | C56  | 2.846(6) |
| C51  | C59  | 3.481(5) | C51  | C61  | 2.885(5) |
| C53  | C59  | 3.138(5) | C53  | C60  | 2.976(5) |
| C67  | C69  | 3.230(5) |      |      |          |

Table S12-10. Intramolecular contacts less than 3.60 Å involving hydrogens

| atom | atom | distance | atom | atom | distance |
|------|------|----------|------|------|----------|
| Ti1  | H1A  | 3.008    | Ti1  | H9C  | 3.398    |
| Ti1  | H10A | 2.997    | Ti1  | H21C | 3.355    |
| Ti1  | H22C | 3.429    | Ti1  | H23B | 3.464    |
| Ti2  | H24A | 3.139    | Ti2  | H32A | 3.041    |
| Ti2  | H34A | 3.293    | Ti2  | H44C | 3.409    |
| Ti2  | H45B | 3.463    | Ti2  | H46B | 3.411    |
| Ti3  | H47A | 3.329    | Ti3  | H47B | 3.167    |
| Ti3  | H55B | 3.285    | Ti3  | H57B | 3.103    |
| Ti3  | H67B | 3.327    | Ti3  | H68B | 3.471    |
| Ti3  | H69B | 3.427    | Cl1  | H9C  | 2.985    |
| Cl1  | H10A | 3.090    | Cl1  | H17  | 3.402    |
| Cl1  | H22A | 3.245    | Cl1  | H22C | 2.987    |
| Cl2  | H1A  | 2.791    | Cl2  | H20  | 3.587    |
| Cl2  | H23A | 3.259    | Cl2  | H23B | 2.807    |
| Cl2  | H45A | 3.073    | Cl3  | H24A | 3.041    |
| Cl3  | H45A | 3.299    | Cl3  | H45B | 2.797    |
| Cl3  | H68A | 2.881    | Cl4  | H32A | 2.993    |
| Cl4  | H34A | 3.020    | Cl4  | H42  | 3.189    |
| Cl4  | H46A | 3.361    | Cl4  | H46B | 3.308    |
| Cl5  | H55B | 2.796    | Cl5  | H57B | 3.209    |
| Cl5  | H65  | 3.206    | Cl5  | H69A | 3.303    |
| Cl5  | H69B | 3.226    | Cl6  | H47A | 2.945    |
| Cl6  | H68A | 3.347    | Cl6  | H68B | 2.798    |
| O1   | H1A  | 2.484    | O1   | H1B  | 3.065    |
| O1   | H9A  | 3.595    | O1   | H9C  | 2.490    |
| O1   | H10A | 2.357    | O1   | H10C | 3.501    |
| O1   | H21A | 3.368    | O1   | H21C | 2.704    |
| O2   | H24A | 2.510    | O2   | H24B | 3.077    |
| O2   | H32A | 2.420    | O2   | H32C | 3.594    |
| O2   | H34A | 2.363    | O2   | H34B | 3.523    |
| O2   | H40  | 3.590    | O2   | H44A | 3.387    |
| O2   | H44C | 2.806    | O2   | H63  | 3.095    |
| O2   | H68A | 3.453    | O3   | H47A | 2.700    |
| O3   | H47B | 2.639    | O3   | H55B | 2.424    |
| O3   | H55C | 3.562    | O3   | H57A | 3.530    |
| O3   | H57B | 2.416    | O3   | H67A | 3.548    |
| O3   | H67B | 2.680    | N1   | H7   | 2.457    |

Table S12-10. Intramolecular contacts less than 3.60 Å involving hydrogens (continued)

| atom | atom | distance | atom | atom | distance |
|------|------|----------|------|------|----------|
| N1   | H30  | 2.455    | N1   | H53  | 2.462    |
| C1   | H7   | 2.645    | C1   | H20  | 3.116    |
| C1   | H21A | 3.261    | C1   | H24A | 2.705    |
| C1   | H24B | 2.488    | C1   | H47A | 2.449    |
| C1   | H47B | 3.217    | C1   | H53  | 2.773    |
| C2   | H21A | 3.336    | C2   | H21C | 3.373    |
| C2   | H24A | 3.549    | C2   | H24B | 2.609    |
| C2   | H53  | 3.298    | C3   | H1A  | 2.648    |
| C3   | H1B  | 2.919    | C3   | H5   | 3.233    |
| C3   | H7   | 3.252    | C3   | H9A  | 3.343    |
| C3   | H9C  | 2.854    | C3   | H10A | 2.845    |
| C3   | H10C | 3.401    | C3   | H21A | 3.382    |
| C3   | H21C | 2.776    | C3   | H24B | 3.547    |
| C4   | H9A  | 2.623    | C4   | H9B  | 3.329    |
| C4   | H9C  | 2.675    | C4   | H10A | 2.730    |
| C4   | H10B | 3.390    | C4   | H10C | 2.770    |
| C4   | H11A | 2.701    | C4   | H11B | 2.754    |
| C4   | H11C | 3.376    | C4   | H21C | 3.247    |
| C5   | H7   | 3.227    | C5   | H9A  | 3.294    |
| C5   | H11A | 2.633    | C5   | H11B | 2.838    |
| C5   | H13A | 2.716    | C5   | H13C | 2.921    |
| C5   | H14A | 3.347    | C6   | H13A | 2.717    |
| C6   | H13B | 3.381    | C6   | H13C | 2.766    |
| C6   | H14A | 2.663    | C6   | H14B | 2.666    |
| C6   | H14C | 3.337    | C6   | H15A | 2.674    |
| C6   | H15B | 2.739    | C6   | H15C | 3.360    |
| C7   | H1A  | 3.239    | C7   | H1B  | 3.008    |
| C7   | H5   | 3.220    | C7   | H14A | 3.349    |
| C7   | H14B | 2.769    | C7   | H15A | 2.653    |
| C7   | H15B | 3.269    | C7   | H24B | 2.745    |
| C7   | H30  | 3.467    | C7   | H53  | 3.210    |
| C8   | H5   | 2.678    | C9   | H10A | 2.733    |
| C9   | H10B | 2.691    | C9   | H10C | 3.365    |
| C9   | H11A | 2.662    | C9   | H11B | 3.332    |
| C9   | H11C | 2.649    | C10  | H9A  | 3.365    |
| C10  | H9B  | 2.712    | C10  | H9C  | 2.712    |
| C10  | H11A | 3.317    | C10  | H11B | 2.635    |

Table S12-10. Intramolecular contacts less than 3.60 Å involving hydrogens (continued)

| atom | atom | distance | atom | atom | distance |
|------|------|----------|------|------|----------|
| C10  | H11C | 2.635    | C10  | H21C | 2.997    |
| C11  | H5   | 2.412    | C11  | H9A  | 2.683    |
| C11  | H9B  | 2.631    | C11  | H9C  | 3.330    |
| C11  | H10A | 3.317    | C11  | H10B | 2.635    |
| C11  | H10C | 2.635    | C12  | H5   | 2.720    |
| C12  | H7   | 2.644    | C13  | H5   | 2.517    |
| C13  | H14A | 2.661    | C13  | H14B | 3.325    |
| C13  | H14C | 2.633    | C13  | H15A | 3.345    |
| C13  | H15B | 2.682    | C13  | H15C | 2.682    |
| C14  | H7   | 2.992    | C14  | H13A | 2.664    |
| C14  | H13B | 2.628    | C14  | H13C | 3.325    |
| C14  | H15A | 2.694    | C14  | H15B | 3.340    |
| C14  | H15C | 2.646    | C14  | H44A | 3.017    |
| C15  | H7   | 2.718    | C15  | H13A | 3.345    |
| C15  | H13B | 2.682    | C15  | H13C | 2.682    |
| C15  | H14A | 3.339    | C15  | H14B | 2.671    |
| C15  | H14C | 2.671    | C15  | H36A | 3.358    |
| C16  | H1B  | 3.339    | C16  | H10A | 3.332    |
| C17  | H10A | 3.122    | C17  | H20  | 3.215    |
| C17  | H21A | 3.352    | C17  | H21B | 2.847    |
| C17  | H21C | 2.847    | C17  | H22A | 2.683    |
| C17  | H22B | 3.205    | C17  | H22C | 3.235    |
| C18  | H20  | 3.235    | C18  | H23A | 3.358    |
| C18  | H23B | 2.861    | C18  | H23C | 2.861    |
| C19  | H17  | 3.237    | C19  | H22A | 3.346    |
| C19  | H22B | 2.838    | C19  | H22C | 2.838    |
| C20  | H1A  | 3.229    | C20  | H1B  | 2.993    |
| C20  | H17  | 3.215    | C20  | H21A | 2.690    |
| C20  | H21B | 3.199    | C20  | H21C | 3.232    |
| C20  | H23A | 2.652    | C20  | H23B | 3.219    |
| C20  | H23C | 3.182    | C21  | H1B  | 3.182    |
| C21  | H10A | 3.309    | C21  | H10C | 3.575    |
| C21  | H17  | 2.882    | C21  | H20  | 2.921    |
| C22  | H17  | 2.920    | C22  | H23B | 3.152    |
| C22  | H23C | 3.159    | C23  | H20  | 2.886    |
| C23  | H22B | 3.145    | C23  | H22C | 3.153    |
| C24  | H1A  | 2.516    | C24  | H1B  | 3.245    |



Table S12-10. Intramolecular contacts less than 3.60 Å involving hydrogens (continued)

| atom | atom | distance | atom | atom | distance |
|------|------|----------|------|------|----------|
| C24  | H7   | 2.956    | C24  | H30  | 2.634    |
| C24  | H40  | 2.988    | C24  | H44A | 3.143    |
| C24  | H47A | 2.773    | C24  | H47B | 2.407    |
| C24  | H63  | 3.370    | C25  | H7   | 3.482    |
| C25  | H44A | 3.098    | C25  | H44C | 3.240    |
| C25  | H47B | 2.559    | C25  | H63  | 2.874    |
| C26  | H24A | 2.649    | C26  | H24B | 2.956    |
| C26  | H28  | 3.238    | C26  | H30  | 3.255    |
| C26  | H32A | 2.831    | C26  | H32C | 3.415    |
| C26  | H34A | 2.791    | C26  | H34B | 3.349    |
| C26  | H44A | 3.299    | C26  | H44C | 2.767    |
| C26  | H47B | 3.419    | C26  | H63  | 2.726    |
| C27  | H32A | 2.678    | C27  | H32B | 3.357    |
| C27  | H32C | 2.709    | C27  | H33A | 2.727    |
| C27  | H33B | 2.738    | C27  | H33C | 3.380    |
| C27  | H34A | 2.683    | C27  | H34B | 2.706    |
| C27  | H34C | 3.359    | C27  | H44C | 3.259    |
| C27  | H63  | 3.168    | C28  | H30  | 3.231    |
| C28  | H32C | 3.489    | C28  | H33A | 2.745    |
| C28  | H33B | 2.733    | C28  | H34B | 3.536    |
| C28  | H36B | 3.308    | C28  | H37A | 2.689    |
| C28  | H37B | 2.924    | C28  | H67C | 3.146    |
| C29  | H36A | 2.623    | C29  | H36B | 2.659    |
| C29  | H36C | 3.322    | C29  | H37A | 2.703    |
| C29  | H37B | 2.743    | C29  | H37C | 3.368    |
| C29  | H38A | 2.689    | C29  | H38B | 3.365    |
| C29  | H38C | 2.740    | C29  | H67C | 3.061    |
| C30  | H7   | 3.249    | C30  | H14B | 3.472    |
| C30  | H24A | 3.246    | C30  | H24B | 2.983    |
| C30  | H28  | 3.225    | C30  | H36A | 2.802    |
| C30  | H36B | 3.437    | C30  | H38A | 2.660    |
| C30  | H38C | 3.215    | C30  | H47B | 2.825    |
| C30  | H63  | 3.470    | C30  | H67B | 3.514    |
| C30  | H67C | 3.523    | C31  | H28  | 2.685    |
| C32  | H33A | 3.326    | C32  | H33B | 2.650    |
| C32  | H33C | 2.651    | C32  | H34A | 2.732    |
| C32  | H34B | 3.364    | C32  | H34C | 2.693    |

Table S12-10. Intramolecular contacts less than 3.60 Å involving hydrogens (continued)

| atom | atom | distance | atom | atom | distance |
|------|------|----------|------|------|----------|
| C32  | H44C | 3.205    | C32  | H46B | 2.813    |
| C33  | H28  | 2.421    | C33  | H32A | 3.325    |
| C33  | H32B | 2.651    | C33  | H32C | 2.652    |
| C33  | H34A | 3.318    | C33  | H34B | 2.639    |
| C33  | H34C | 2.639    | C34  | H32A | 2.735    |
| C34  | H32B | 2.688    | C34  | H32C | 3.365    |
| C34  | H33A | 2.643    | C34  | H33B | 3.319    |
| C34  | H33C | 2.631    | C34  | H63  | 3.433    |
| C35  | H28  | 2.713    | C35  | H30  | 2.664    |
| C35  | H67C | 3.508    | C36  | H30  | 3.055    |
| C36  | H37A | 2.678    | C36  | H37B | 3.328    |
| C36  | H37C | 2.648    | C36  | H38A | 2.672    |
| C36  | H38B | 2.649    | C36  | H38C | 3.328    |
| C37  | H28  | 2.514    | C37  | H36A | 3.325    |
| C37  | H36B | 2.667    | C37  | H36C | 2.667    |
| C37  | H38A | 3.295    | C37  | H38B | 2.621    |
| C37  | H38C | 2.621    | C38  | H30  | 2.706    |
| C38  | H36A | 2.684    | C38  | H36B | 3.327    |
| C38  | H36C | 2.640    | C38  | H37A | 3.298    |
| C38  | H37B | 2.617    | C38  | H37C | 2.617    |
| C38  | H59A | 3.503    | C38  | H67B | 3.319    |
| C38  | H67C | 3.380    | C39  | H24B | 3.249    |
| C39  | H32A | 3.462    | C39  | H42  | 3.236    |
| C39  | H46A | 3.364    | C39  | H46B | 2.861    |
| C39  | H46C | 2.861    | C40  | H24A | 3.257    |
| C40  | H24B | 2.838    | C40  | H42  | 3.223    |
| C40  | H44A | 2.680    | C40  | H44B | 3.193    |
| C40  | H44C | 3.230    | C40  | H45A | 2.663    |
| C40  | H45B | 3.223    | C40  | H45C | 3.182    |
| C42  | H40  | 3.220    | C42  | H45A | 3.359    |
| C42  | H45B | 2.863    | C42  | H45C | 2.863    |
| C42  | H46A | 2.661    | C42  | H46B | 3.226    |
| C42  | H46C | 3.176    | C43  | H32A | 3.269    |
| C43  | H40  | 3.238    | C43  | H44A | 3.362    |
| C43  | H44B | 2.850    | C43  | H44C | 2.850    |
| C44  | H14A | 3.312    | C44  | H14B | 3.343    |
| C44  | H24B | 3.125    | C44  | H32A | 3.465    |

Table S12-10. Intramolecular contacts less than 3.60 Å involving hydrogens (continued)

| atom | atom | distance | atom | atom | distance |
|------|------|----------|------|------|----------|
| C44  | H40  | 2.910    | C44  | H46B | 3.152    |
| C44  | H46C | 3.148    | C45  | H40  | 2.897    |
| C45  | H42  | 2.906    | C46  | H32A | 3.019    |
| C46  | H42  | 2.892    | C46  | H44B | 3.150    |
| C46  | H44C | 3.145    | C47  | H1A  | 2.707    |
| C47  | H1B  | 2.494    | C47  | H24A | 2.513    |
| C47  | H24B | 3.237    | C47  | H30  | 3.001    |
| C47  | H53  | 2.682    | C47  | H63  | 3.112    |
| C47  | H67B | 3.221    | C48  | H1B  | 2.809    |
| C48  | H30  | 3.374    | C48  | H67B | 2.992    |
| C49  | H47A | 2.746    | C49  | H47B | 2.705    |
| C49  | H51  | 3.241    | C49  | H53  | 3.260    |
| C49  | H55B | 2.829    | C49  | H55C | 3.366    |
| C49  | H57A | 3.346    | C49  | H57B | 2.837    |
| C49  | H67B | 2.725    | C50  | H55A | 3.350    |
| C50  | H55B | 2.686    | C50  | H55C | 2.686    |
| C50  | H56A | 2.742    | C50  | H56B | 3.387    |
| C50  | H56C | 2.749    | C50  | H57A | 2.686    |
| C50  | H57B | 2.703    | C50  | H57C | 3.357    |
| C50  | H67B | 3.449    | C51  | H53  | 3.236    |
| C51  | H55C | 3.475    | C51  | H56A | 2.750    |
| C51  | H56C | 2.745    | C51  | H57A | 3.511    |
| C51  | H59B | 3.333    | C51  | H61A | 2.682    |
| C51  | H61B | 2.899    | C52  | H59A | 2.656    |
| C52  | H59B | 2.676    | C52  | H59C | 3.337    |
| C52  | H60A | 2.690    | C52  | H60B | 3.364    |
| C52  | H60C | 2.733    | C52  | H61A | 2.700    |
| C52  | H61B | 2.739    | C52  | H61C | 3.369    |
| C53  | H1B  | 2.771    | C53  | H7   | 3.575    |
| C53  | H30  | 3.343    | C53  | H38A | 3.335    |
| C53  | H47A | 3.150    | C53  | H47B | 3.160    |
| C53  | H51  | 3.230    | C53  | H59A | 2.841    |
| C53  | H59B | 3.456    | C53  | H60A | 2.658    |
| C53  | H60C | 3.210    | C54  | H51  | 2.675    |
| C55  | H56A | 3.322    | C55  | H56B | 2.645    |
| C55  | H56C | 2.645    | C55  | H57A | 3.364    |
| C55  | H57B | 2.713    | C55  | H57C | 2.713    |

Table S12-10. Intramolecular contacts less than 3.60 Å involving hydrogens (continued)

| atom | atom | distance | atom | atom | distance |
|------|------|----------|------|------|----------|
| C56  | H51  | 2.419    | C56  | H55A | 2.626    |
| C56  | H55B | 3.324    | C56  | H55C | 2.660    |
| C56  | H57A | 2.673    | C56  | H57B | 3.328    |
| C56  | H57C | 2.623    | C57  | H55A | 2.703    |
| C57  | H55B | 2.719    | C57  | H55C | 3.365    |
| C57  | H56A | 2.655    | C57  | H56B | 2.641    |
| C57  | H56C | 3.328    | C57  | H67A | 3.253    |
| C57  | H67B | 3.541    | C57  | H69B | 2.889    |
| C58  | H51  | 2.714    | C58  | H53  | 2.667    |
| C59  | H38A | 3.344    | C59  | H53  | 3.058    |
| C59  | H60A | 2.681    | C59  | H60B | 2.645    |
| C59  | H60C | 3.330    | C59  | H61A | 2.668    |
| C59  | H61B | 3.324    | C59  | H61C | 2.637    |
| C60  | H21A | 3.521    | C60  | H53  | 2.725    |
| C60  | H59A | 2.682    | C60  | H59B | 3.330    |
| C60  | H59C | 2.646    | C60  | H61A | 3.321    |
| C60  | H61B | 2.650    | C60  | H61C | 2.650    |
| C61  | H51  | 2.496    | C61  | H59A | 3.323    |
| C61  | H59B | 2.654    | C61  | H59C | 2.653    |
| C61  | H60A | 3.321    | C61  | H60B | 2.650    |
| C61  | H60C | 2.650    | C62  | H47B | 3.142    |
| C62  | H57B | 3.304    | C62  | H65  | 3.248    |
| C62  | H69A | 3.379    | C62  | H69B | 2.883    |
| C62  | H69C | 2.883    | C63  | H34A | 3.569    |
| C63  | H34B | 3.151    | C63  | H47B | 2.673    |
| C63  | H65  | 3.214    | C63  | H67A | 3.355    |
| C63  | H67B | 2.846    | C63  | H67C | 2.846    |
| C63  | H68A | 2.681    | C63  | H68B | 3.223    |
| C63  | H68C | 3.189    | C64  | H34B | 3.394    |
| C65  | H63  | 3.210    | C65  | H68A | 3.352    |
| C65  | H68B | 2.846    | C65  | H68C | 2.847    |
| C65  | H69A | 2.648    | C65  | H69B | 3.229    |
| C65  | H69C | 3.168    | C66  | H57B | 3.246    |
| C66  | H63  | 3.225    | C66  | H67A | 2.678    |
| C66  | H67B | 3.217    | C66  | H67C | 3.200    |
| C67  | H38C | 2.891    | C67  | H47B | 3.188    |
| C67  | H57A | 3.501    | C67  | H57B | 3.144    |

Table S12-10. Intramolecular contacts less than 3.60 Å involving hydrogens (continued)

| atom | atom | distance | atom | atom | distance |
|------|------|----------|------|------|----------|
| C67  | H63  | 2.880    | C67  | H69B | 3.198    |
| C67  | H69C | 3.226    | C68  | H34A | 3.377    |
| C68  | H63  | 2.905    | C68  | H65  | 2.890    |
| C69  | H57B | 3.058    | C69  | H65  | 2.878    |
| C69  | H67A | 2.813    | H1A  | H7   | 3.483    |
| H1A  | H20  | 2.909    | H1A  | H24A | 2.456    |
| H1A  | H24B | 2.582    | H1A  | H40  | 3.460    |
| H1A  | H47A | 2.416    | H1A  | H47B | 3.432    |
| H1B  | H7   | 3.106    | H1B  | H20  | 2.428    |
| H1B  | H21A | 2.488    | H1B  | H21C | 3.401    |
| H1B  | H24A | 3.508    | H1B  | H24B | 3.447    |
| H1B  | H47A | 2.463    | H1B  | H47B | 3.449    |
| H1B  | H53  | 2.405    | H1B  | H60A | 3.411    |
| H5   | H9A  | 3.391    | H5   | H11A | 2.040    |
| H5   | H11B | 2.337    | H5   | H11C | 3.368    |
| H5   | H13A | 2.161    | H5   | H13B | 3.478    |
| H5   | H13C | 2.437    | H5   | H14A | 3.467    |
| H7   | H14A | 3.485    | H7   | H14B | 2.470    |
| H7   | H15A | 2.109    | H7   | H15B | 3.136    |
| H7   | H15C | 3.537    | H7   | H24B | 2.674    |
| H7   | H30  | 2.583    | H7   | H53  | 2.688    |
| H7   | H60A | 3.429    | H9A  | H10B | 3.586    |
| H9A  | H11A | 2.496    | H9A  | H11B | 3.578    |
| H9A  | H11C | 2.963    | H9B  | H10A | 3.029    |
| H9B  | H10B | 2.513    | H9B  | H10C | 3.593    |
| H9B  | H11A | 2.906    | H9B  | H11B | 3.532    |
| H9B  | H11C | 2.426    | H9C  | H10A | 2.558    |
| H9C  | H10B | 2.967    | H9C  | H11A | 3.570    |
| H9C  | H11C | 3.535    | H10A | H11B | 3.536    |
| H10A | H11C | 3.535    | H10A | H17  | 2.859    |
| H10A | H21C | 2.544    | H10B | H11A | 3.535    |
| H10B | H11B | 2.912    | H10B | H11C | 2.433    |
| H10C | H11A | 3.535    | H10C | H11B | 2.433    |
| H10C | H11C | 2.912    | H10C | H21C | 2.659    |
| H11A | H13A | 3.456    | H13A | H14A | 2.482    |
| H13A | H14B | 3.565    | H13A | H14C | 2.930    |
| H13A | H15B | 3.576    | H13A | H15C | 3.576    |

Table S12-10. Intramolecular contacts less than 3.60 Å involving hydrogens (continued)

| atom | atom | distance | atom | atom | distance |
|------|------|----------|------|------|----------|
| H13B | H14A | 2.919    | H13B | H14B | 3.525    |
| H13B | H14C | 2.414    | H13B | H15A | 3.577    |
| H13B | H15B | 2.965    | H13B | H15C | 2.496    |
| H13C | H14A | 3.565    | H13C | H14C | 3.528    |
| H13C | H15A | 3.577    | H13C | H15B | 2.496    |
| H13C | H15C | 2.965    | H14A | H15A | 3.584    |
| H14A | H15C | 3.548    | H14A | H44A | 2.645    |
| H14A | H44B | 3.104    | H14B | H15A | 2.506    |
| H14B | H15B | 3.578    | H14B | H15C | 2.916    |
| H14B | H24B | 3.308    | H14B | H30  | 3.292    |
| H14B | H36A | 2.983    | H14B | H44A | 2.518    |
| H14B | H44B | 3.514    | H14B | H44C | 3.594    |
| H14C | H15A | 2.987    | H14C | H15B | 3.556    |
| H14C | H15C | 2.456    | H14C | H36A | 3.479    |
| H15A | H30  | 3.274    | H15A | H36A | 2.713    |
| H15A | H59A | 3.005    | H15C | H36A | 3.168    |
| H17  | H21B | 2.931    | H17  | H21C | 2.954    |
| H17  | H22A | 2.638    | H17  | H22B | 3.531    |
| H20  | H21A | 2.648    | H20  | H21B | 3.535    |
| H20  | H23A | 2.591    | H20  | H23B | 3.578    |
| H20  | H23C | 3.498    | H20  | H47A | 3.276    |
| H21A | H60A | 3.138    | H21A | H60C | 2.992    |
| H22B | H23B | 3.236    | H22B | H23C | 2.825    |
| H22C | H23B | 2.825    | H22C | H23C | 3.257    |
| H24A | H30  | 3.492    | H24A | H40  | 2.888    |
| H24A | H47A | 2.563    | H24A | H47B | 2.447    |
| H24A | H63  | 3.040    | H24B | H30  | 3.055    |
| H24B | H40  | 2.230    | H24B | H44A | 2.413    |
| H24B | H44C | 3.417    | H24B | H47A | 3.557    |
| H24B | H47B | 3.374    | H28  | H32C | 3.576    |
| H28  | H33A | 2.220    | H28  | H33B | 2.169    |
| H28  | H33C | 3.386    | H28  | H36B | 3.370    |
| H28  | H37A | 2.103    | H28  | H37B | 2.492    |
| H28  | H37C | 3.467    | H28  | H67C | 3.328    |
| H30  | H36A | 2.538    | H30  | H36B | 3.587    |
| H30  | H38A | 2.107    | H30  | H38B | 3.551    |
| H30  | H38C | 3.073    | H30  | H47B | 2.847    |

Table S12-10. Intramolecular contacts less than 3.60 Å involving hydrogens (continued)

| atom | atom | distance | atom | atom | distance |
|------|------|----------|------|------|----------|
| H30  | H53  | 2.980    | H30  | H67B | 3.577    |
| H32A | H33B | 3.548    | H32A | H33C | 3.549    |
| H32A | H34A | 2.582    | H32A | H34C | 3.004    |
| H32A | H44C | 2.691    | H32A | H46A | 3.541    |
| H32A | H46B | 2.164    | H32B | H33A | 3.550    |
| H32B | H33B | 2.931    | H32B | H33C | 2.456    |
| H32B | H34A | 2.992    | H32B | H34B | 3.575    |
| H32B | H34C | 2.490    | H32B | H46B | 3.002    |
| H32C | H33A | 3.550    | H32C | H33B | 2.455    |
| H32C | H33C | 2.931    | H32C | H34C | 3.577    |
| H32C | H44C | 2.921    | H32C | H46B | 2.860    |
| H33A | H34A | 3.541    | H33A | H34B | 2.443    |
| H33A | H34C | 2.924    | H33B | H34B | 3.542    |
| H33B | H34C | 3.536    | H33C | H34A | 3.532    |
| H33C | H34B | 2.907    | H33C | H34C | 2.431    |
| H34A | H63  | 3.111    | H34A | H68A | 2.858    |
| H34A | H68C | 3.235    | H34B | H63  | 2.995    |
| H34B | H68A | 3.499    | H34B | H68C | 3.418    |
| H36A | H37A | 3.567    | H36A | H37C | 3.545    |
| H36A | H38A | 2.507    | H36A | H38B | 2.960    |
| H36A | H38C | 3.580    | H36B | H37A | 2.495    |
| H36B | H37B | 3.569    | H36B | H37C | 2.929    |
| H36B | H38A | 3.575    | H36B | H38B | 3.536    |
| H36C | H37A | 2.973    | H36C | H37B | 3.555    |
| H36C | H37C | 2.463    | H36C | H38A | 2.928    |
| H36C | H38B | 2.436    | H36C | H38C | 3.536    |
| H37A | H38B | 3.521    | H37A | H38C | 3.521    |
| H37B | H38A | 3.516    | H37B | H38B | 2.900    |
| H37B | H38C | 2.418    | H37B | H67C | 2.911    |
| H37C | H38A | 3.516    | H37C | H38B | 2.418    |
| H37C | H38C | 2.900    | H38A | H53  | 3.284    |
| H38A | H59A | 2.694    | H38A | H59B | 3.132    |
| H38A | H67B | 3.348    | H38B | H59A | 3.475    |
| H38B | H59B | 3.332    | H38C | H67A | 3.091    |
| H38C | H67B | 2.531    | H38C | H67C | 2.597    |
| H40  | H44A | 2.631    | H40  | H44B | 3.518    |
| H40  | H45A | 2.610    | H40  | H45B | 3.589    |

Table S12-10. Intramolecular contacts less than 3.60 Å involving hydrogens (continued)

| atom | atom | distance | atom | atom | distance |
|------|------|----------|------|------|----------|
| H40  | H45C | 3.506    | H42  | H45B | 2.971    |
| H42  | H45C | 2.971    | H42  | H46A | 2.604    |
| H42  | H46B | 3.589    | H42  | H46C | 3.497    |
| H44B | H46B | 3.247    | H44B | H46C | 2.818    |
| H44C | H46B | 2.818    | H44C | H46C | 3.234    |
| H47A | H53  | 3.348    | H47A | H63  | 3.318    |
| H47B | H53  | 3.367    | H47B | H63  | 2.179    |
| H47B | H67B | 2.561    | H47B | H67C | 3.477    |
| H51  | H55C | 3.571    | H51  | H56A | 2.213    |
| H51  | H56B | 3.386    | H51  | H56C | 2.180    |
| H51  | H59B | 3.378    | H51  | H61A | 2.091    |
| H51  | H61B | 2.464    | H51  | H61C | 3.449    |
| H53  | H59A | 2.544    | H53  | H59B | 3.577    |
| H53  | H60A | 2.126    | H53  | H60B | 3.565    |
| H53  | H60C | 3.101    | H55A | H56A | 3.529    |
| H55A | H56B | 2.427    | H55A | H56C | 2.897    |
| H55A | H57A | 3.595    | H55A | H57B | 2.986    |
| H55A | H57C | 2.527    | H55B | H56B | 3.536    |
| H55B | H56C | 3.552    | H55B | H57B | 2.544    |
| H55B | H57C | 3.011    | H55C | H56A | 3.555    |
| H55C | H56B | 2.947    | H55C | H56C | 2.463    |
| H55C | H57C | 3.600    | H56A | H57A | 2.483    |
| H56A | H57B | 3.564    | H56A | H57C | 2.898    |
| H56B | H57A | 2.951    | H56B | H57B | 3.530    |
| H56B | H57C | 2.415    | H56C | H57A | 3.570    |
| H56C | H57C | 3.525    | H57A | H67A | 2.875    |
| H57A | H67B | 3.272    | H57A | H69B | 3.157    |
| H57B | H67A | 2.737    | H57B | H67B | 3.003    |
| H57B | H69B | 2.221    | H57C | H69B | 2.881    |
| H59A | H60A | 2.513    | H59A | H60B | 2.947    |
| H59A | H60C | 3.582    | H59A | H61A | 3.561    |
| H59A | H61C | 3.538    | H59B | H60A | 3.581    |
| H59B | H60B | 3.536    | H59B | H61A | 2.477    |
| H59B | H61B | 3.558    | H59B | H61C | 2.912    |
| H59C | H60A | 2.946    | H59C | H60B | 2.435    |
| H59C | H60C | 3.537    | H59C | H61A | 2.958    |
| H59C | H61B | 3.543    | H59C | H61C | 2.444    |



Table S12-10. Intramolecular contacts less than 3.60 Å involving hydrogens (continued)

| atom | atom | distance | atom | atom | distance |
|------|------|----------|------|------|----------|
| H60A | H61B | 3.547    | H60A | H61C | 3.547    |
| H60B | H61A | 3.547    | H60B | H61B | 2.932    |
| H60B | H61C | 2.456    | H60C | H61A | 3.547    |
| H60C | H61B | 2.456    | H60C | H61C | 2.932    |
| H63  | H67B | 2.956    | H63  | H67C | 2.920    |
| H63  | H68A | 2.631    | H63  | H68B | 3.591    |
| H63  | H68C | 3.520    | H65  | H68B | 2.952    |
| H65  | H68C | 2.947    | H65  | H69A | 2.579    |
| H65  | H69B | 3.580    | H65  | H69C | 3.478    |
| H67A | H69B | 2.627    | H67A | H69C | 2.701    |

Table S12-11. Intermolecular contacts less than 3.60 Å

| atom | atom             | distance | atom | atom             | distance |
|------|------------------|----------|------|------------------|----------|
| C40  | C55 <sup>1</sup> | 3.459(5) | C41  | C55 <sup>1</sup> | 3.546(5) |
| C45  | C59 <sup>2</sup> | 3.512(5) | C55  | C40 <sup>3</sup> | 3.459(5) |
| C55  | C41 <sup>3</sup> | 3.546(5) | C59  | C45 <sup>4</sup> | 3.512(5) |

Symmetry Operators:

(1)  $-X+1/2+1, Y+1/2-1, -Z+1/2$   
 (3)  $-X+1/2+1, Y+1/2, -Z+1/2$

(2)  $X+1, Y, Z$   
 (4)  $X-1, Y, Z$

Table S12-12. Intermolecular contacts less than 3.60 Å involving hydrogens

| atom | atom              | distance | atom | atom              | distance |
|------|-------------------|----------|------|-------------------|----------|
| Cl1  | H59C <sup>1</sup> | 3.443    | Cl1  | H61C <sup>1</sup> | 3.103    |
| Cl1  | H67A <sup>2</sup> | 3.154    | Cl1  | H67C <sup>2</sup> | 3.236    |
| Cl1  | H69C <sup>2</sup> | 3.045    | Cl2  | H59B <sup>1</sup> | 3.477    |
| Cl2  | H59C <sup>1</sup> | 3.520    | Cl2  | H61A <sup>1</sup> | 3.540    |
| Cl2  | H61C <sup>1</sup> | 3.522    | Cl4  | H17 <sup>3</sup>  | 3.444    |
| Cl4  | H21B <sup>3</sup> | 3.118    | Cl4  | H32B <sup>4</sup> | 2.971    |
| Cl4  | H33C <sup>4</sup> | 3.248    | Cl4  | H37C <sup>1</sup> | 3.083    |
| Cl5  | H5 <sup>5</sup>   | 3.535    | Cl5  | H9A <sup>5</sup>  | 3.362    |
| Cl5  | H11A <sup>5</sup> | 2.828    | Cl5  | H13A <sup>5</sup> | 3.283    |
| Cl5  | H13C <sup>3</sup> | 3.025    | Cl6  | H13A <sup>5</sup> | 3.596    |
| Cl6  | H14A <sup>5</sup> | 3.277    | C4   | H68B <sup>6</sup> | 3.541    |
| C4   | H68C <sup>6</sup> | 3.414    | C5   | H65 <sup>6</sup>  | 3.373    |
| C5   | H68B <sup>6</sup> | 3.507    | C5   | H68C <sup>6</sup> | 3.580    |
| C6   | H65 <sup>6</sup>  | 3.194    | C8   | H68B <sup>6</sup> | 3.551    |
| C9   | H55A <sup>7</sup> | 3.397    | C9   | H57A <sup>2</sup> | 3.334    |
| C9   | H57C <sup>2</sup> | 3.593    | C9   | H69B <sup>2</sup> | 3.345    |
| C9   | H69C <sup>2</sup> | 3.434    | C10  | H68B <sup>6</sup> | 3.376    |
| C10  | H68C <sup>6</sup> | 3.501    | C11  | H13B <sup>8</sup> | 2.967    |
| C11  | H57A <sup>2</sup> | 3.326    | C11  | H68B <sup>6</sup> | 3.248    |
| C12  | H65 <sup>6</sup>  | 3.238    | C13  | H11A <sup>8</sup> | 3.243    |
| C13  | H11B <sup>8</sup> | 3.464    | C13  | H65 <sup>6</sup>  | 3.183    |
| C14  | H23A <sup>7</sup> | 3.142    | C14  | H23C <sup>7</sup> | 3.356    |
| C15  | H56B <sup>9</sup> | 3.449    | C15  | H65 <sup>6</sup>  | 2.992    |
| C15  | H69A <sup>6</sup> | 3.122    | C16  | H32C <sup>5</sup> | 2.826    |
| C17  | H32C <sup>5</sup> | 2.786    | C17  | H33B <sup>5</sup> | 3.462    |
| C17  | H37B <sup>2</sup> | 3.284    | C18  | H32C <sup>5</sup> | 2.977    |
| C18  | H33B <sup>5</sup> | 3.329    | C19  | H32C <sup>5</sup> | 3.138    |
| C19  | H44C <sup>5</sup> | 3.323    | C20  | H32C <sup>5</sup> | 3.062    |
| C20  | H44B <sup>5</sup> | 3.348    | C20  | H44C <sup>5</sup> | 3.293    |
| C20  | H46B <sup>5</sup> | 3.530    | C20  | H46C <sup>5</sup> | 3.566    |
| C21  | H32C <sup>5</sup> | 3.517    | C21  | H34C <sup>6</sup> | 3.305    |
| C21  | H46B <sup>5</sup> | 3.468    | C21  | H68C <sup>6</sup> | 3.096    |
| C22  | H28 <sup>5</sup>  | 3.481    | C22  | H33A <sup>2</sup> | 3.134    |
| C22  | H33B <sup>5</sup> | 3.130    | C22  | H36B <sup>5</sup> | 3.408    |
| C22  | H37A <sup>5</sup> | 3.263    | C22  | H37A <sup>2</sup> | 3.476    |
| C22  | H37B <sup>2</sup> | 3.337    | C22  | H61C <sup>1</sup> | 3.264    |
| C23  | H14B <sup>5</sup> | 3.421    | C23  | H14C <sup>5</sup> | 3.163    |

Table S12-12. Intermolecular contacts less than 3.60 Å involving hydrogens (continued)

| atom | atom               | distance | atom | atom               | distance |
|------|--------------------|----------|------|--------------------|----------|
| C23  | H36B <sup>5</sup>  | 3.199    | C23  | H44B <sup>5</sup>  | 3.361    |
| C23  | H44C <sup>5</sup>  | 3.242    | C28  | H22B <sup>7</sup>  | 3.055    |
| C29  | H22B <sup>7</sup>  | 3.588    | C29  | H23C <sup>7</sup>  | 3.550    |
| C32  | H21B <sup>7</sup>  | 3.546    | C33  | H22A <sup>10</sup> | 3.451    |
| C33  | H22C <sup>10</sup> | 3.542    | C33  | H37A <sup>11</sup> | 3.460    |
| C34  | H21B <sup>3</sup>  | 3.104    | C34  | H60C <sup>3</sup>  | 3.252    |
| C36  | H22B <sup>7</sup>  | 3.542    | C36  | H23C <sup>7</sup>  | 3.231    |
| C36  | H42 <sup>12</sup>  | 3.137    | C37  | H17 <sup>10</sup>  | 2.977    |
| C37  | H22A <sup>10</sup> | 2.910    | C37  | H22B <sup>7</sup>  | 3.327    |
| C37  | H33B <sup>11</sup> | 3.474    | C38  | H45B <sup>12</sup> | 3.373    |
| C39  | H55C <sup>7</sup>  | 2.754    | C40  | H55C <sup>7</sup>  | 2.614    |
| C41  | H55C <sup>7</sup>  | 2.675    | C41  | H56C <sup>7</sup>  | 3.411    |
| C42  | H36C <sup>1</sup>  | 3.068    | C42  | H55C <sup>7</sup>  | 2.903    |
| C42  | H56C <sup>7</sup>  | 3.171    | C43  | H55C <sup>7</sup>  | 2.949    |
| C44  | H20 <sup>7</sup>   | 3.351    | C44  | H23A <sup>7</sup>  | 3.157    |
| C44  | H23C <sup>7</sup>  | 3.394    | C44  | H55C <sup>7</sup>  | 3.574    |
| C45  | H36C <sup>1</sup>  | 3.511    | C45  | H38B <sup>1</sup>  | 3.483    |
| C45  | H55C <sup>7</sup>  | 3.417    | C45  | H56C <sup>7</sup>  | 3.566    |
| C45  | H59A <sup>1</sup>  | 3.475    | C45  | H59B <sup>1</sup>  | 3.278    |
| C45  | H59C <sup>1</sup>  | 3.206    | C46  | H20 <sup>7</sup>   | 3.497    |
| C46  | H21A <sup>7</sup>  | 3.481    | C46  | H34C <sup>4</sup>  | 3.488    |
| C46  | H60C <sup>7</sup>  | 3.229    | C51  | H46C <sup>5</sup>  | 3.362    |
| C52  | H46C <sup>5</sup>  | 3.258    | C53  | H46C <sup>5</sup>  | 3.387    |
| C55  | H9A <sup>5</sup>   | 3.358    | C56  | H15C <sup>13</sup> | 3.083    |
| C56  | H45C <sup>5</sup>  | 3.411    | C57  | H9B <sup>10</sup>  | 2.899    |
| C57  | H11C <sup>10</sup> | 3.170    | C59  | H45A <sup>12</sup> | 3.382    |
| C59  | H45B <sup>12</sup> | 3.069    | C59  | H45C <sup>12</sup> | 3.522    |
| C60  | H34B <sup>6</sup>  | 3.244    | C60  | H46A <sup>5</sup>  | 3.539    |
| C61  | H22C <sup>12</sup> | 2.995    | C61  | H23B <sup>12</sup> | 3.337    |
| C65  | H13C <sup>3</sup>  | 3.237    | C65  | H15B <sup>3</sup>  | 2.935    |
| C66  | H15B <sup>3</sup>  | 3.405    | C68  | H10C <sup>3</sup>  | 2.883    |
| C68  | H11B <sup>3</sup>  | 3.283    | C68  | H21C <sup>3</sup>  | 3.305    |
| C69  | H9B <sup>10</sup>  | 3.276    | C69  | H15B <sup>3</sup>  | 3.139    |
| H1B  | H46C <sup>5</sup>  | 3.591    | H5   | Cl5 <sup>7</sup>   | 3.535    |
| H5   | H65 <sup>6</sup>   | 3.308    | H5   | H68B <sup>6</sup>  | 3.330    |
| H9A  | Cl5 <sup>7</sup>   | 3.362    | H9A  | C55 <sup>7</sup>   | 3.358    |
| H9A  | H55A <sup>7</sup>  | 2.610    | H9A  | H55B <sup>7</sup>  | 3.285    |

Table S12-12. Intermolecular contacts less than 3.60 Å involving hydrogens (continued)

| atom | atom               | distance | atom | atom              | distance |
|------|--------------------|----------|------|-------------------|----------|
| H9A  | H69B <sup>2</sup>  | 3.578    | H9B  | C57 <sup>2</sup>  | 2.899    |
| H9B  | C69 <sup>2</sup>   | 3.276    | H9B  | H57A <sup>2</sup> | 2.436    |
| H9B  | H57B <sup>2</sup>  | 3.034    | H9B  | H57C <sup>2</sup> | 2.763    |
| H9B  | H67A <sup>2</sup>  | 2.901    | H9B  | H69B <sup>2</sup> | 2.627    |
| H9B  | H69C <sup>2</sup>  | 3.044    | H9C  | H55A <sup>7</sup> | 3.512    |
| H9C  | H67A <sup>2</sup>  | 3.533    | H9C  | H69B <sup>2</sup> | 3.375    |
| H9C  | H69C <sup>2</sup>  | 3.000    | H10B | H38C <sup>2</sup> | 3.320    |
| H10B | H57A <sup>2</sup>  | 3.020    | H10B | H67A <sup>2</sup> | 3.044    |
| H10C | C68 <sup>6</sup>   | 2.883    | H10C | H68A <sup>6</sup> | 2.965    |
| H10C | H68B <sup>6</sup>  | 2.531    | H10C | H68C <sup>6</sup> | 2.676    |
| H11A | Cl5 <sup>7</sup>   | 2.828    | H11A | C13 <sup>8</sup>  | 3.243    |
| H11A | H13A <sup>8</sup>  | 3.496    | H11A | H13B <sup>8</sup> | 2.683    |
| H11A | H13C <sup>8</sup>  | 3.075    | H11B | C13 <sup>8</sup>  | 3.464    |
| H11B | C68 <sup>6</sup>   | 3.283    | H11B | H13A <sup>8</sup> | 3.450    |
| H11B | H13B <sup>8</sup>  | 2.751    | H11B | H68B <sup>6</sup> | 2.360    |
| H11B | H68C <sup>6</sup>  | 3.483    | H11C | C57 <sup>2</sup>  | 3.170    |
| H11C | H13B <sup>8</sup>  | 2.968    | H11C | H56A <sup>2</sup> | 3.008    |
| H11C | H56B <sup>2</sup>  | 3.595    | H11C | H57A <sup>2</sup> | 2.434    |
| H11C | H57C <sup>2</sup>  | 3.081    | H13A | Cl5 <sup>7</sup>  | 3.283    |
| H13A | Cl6 <sup>7</sup>   | 3.596    | H13A | H11A <sup>8</sup> | 3.496    |
| H13A | H11B <sup>8</sup>  | 3.450    | H13A | H13A <sup>8</sup> | 3.445    |
| H13A | H13C <sup>8</sup>  | 3.323    | H13B | C11 <sup>8</sup>  | 2.967    |
| H13B | H11A <sup>8</sup>  | 2.683    | H13B | H11B <sup>8</sup> | 2.751    |
| H13B | H11C <sup>8</sup>  | 2.968    | H13B | H56A <sup>9</sup> | 3.560    |
| H13C | Cl5 <sup>6</sup>   | 3.025    | H13C | C65 <sup>6</sup>  | 3.237    |
| H13C | H11A <sup>8</sup>  | 3.075    | H13C | H13A <sup>8</sup> | 3.323    |
| H13C | H65 <sup>6</sup>   | 2.400    | H13C | H69A <sup>6</sup> | 3.509    |
| H14A | Cl6 <sup>7</sup>   | 3.277    | H14A | H23A <sup>7</sup> | 3.054    |
| H14B | C23 <sup>7</sup>   | 3.421    | H14B | H23A <sup>7</sup> | 3.106    |
| H14B | H23C <sup>7</sup>  | 2.905    | H14C | C23 <sup>7</sup>  | 3.163    |
| H14C | H23A <sup>7</sup>  | 2.742    | H14C | H23B <sup>7</sup> | 3.188    |
| H14C | H23C <sup>7</sup>  | 3.038    | H15A | H65 <sup>6</sup>  | 3.554    |
| H15B | C65 <sup>6</sup>   | 2.935    | H15B | C66 <sup>6</sup>  | 3.405    |
| H15B | C69 <sup>6</sup>   | 3.139    | H15B | H56B <sup>9</sup> | 3.494    |
| H15B | H65 <sup>6</sup>   | 2.140    | H15B | H69A <sup>6</sup> | 2.333    |
| H15B | H69C <sup>6</sup>  | 3.472    | H15C | C56 <sup>9</sup>  | 3.083    |
| H15C | H45C <sup>12</sup> | 3.509    | H15C | H56A <sup>9</sup> | 3.038    |

Table S12-12. Intermolecular contacts less than 3.60 Å involving hydrogens (continued)

| atom | atom              | distance | atom | atom              | distance |
|------|-------------------|----------|------|-------------------|----------|
| H15C | H56B <sup>9</sup> | 2.595    | H15C | H56C <sup>9</sup> | 3.115    |
| H15C | H69A <sup>6</sup> | 3.087    | H17  | Cl4 <sup>6</sup>  | 3.444    |
| H17  | C37 <sup>2</sup>  | 2.977    | H17  | H32C <sup>5</sup> | 3.126    |
| H17  | H33B <sup>5</sup> | 3.308    | H17  | H37A <sup>2</sup> | 3.296    |
| H17  | H37B <sup>2</sup> | 2.491    | H17  | H37C <sup>2</sup> | 2.717    |
| H20  | C44 <sup>5</sup>  | 3.351    | H20  | C46 <sup>5</sup>  | 3.497    |
| H20  | H32C <sup>5</sup> | 3.574    | H20  | H44B <sup>5</sup> | 2.724    |
| H20  | H44C <sup>5</sup> | 3.096    | H20  | H46B <sup>5</sup> | 3.245    |
| H20  | H46C <sup>5</sup> | 2.876    | H21A | C46 <sup>5</sup>  | 3.481    |
| H21A | H34C <sup>6</sup> | 3.224    | H21A | H46B <sup>5</sup> | 3.160    |
| H21A | H46C <sup>5</sup> | 3.080    | H21A | H68C <sup>6</sup> | 3.262    |
| H21B | Cl4 <sup>6</sup>  | 3.118    | H21B | C32 <sup>5</sup>  | 3.546    |
| H21B | C34 <sup>6</sup>  | 3.104    | H21B | H32B <sup>5</sup> | 3.134    |
| H21B | H32C <sup>5</sup> | 3.171    | H21B | H34A <sup>6</sup> | 2.848    |
| H21B | H34B <sup>6</sup> | 3.510    | H21B | H34C <sup>6</sup> | 2.550    |
| H21B | H46B <sup>5</sup> | 3.192    | H21B | H68C <sup>6</sup> | 3.138    |
| H21C | C68 <sup>6</sup>  | 3.305    | H21C | H68A <sup>6</sup> | 3.470    |
| H21C | H68C <sup>6</sup> | 2.434    | H22A | C33 <sup>2</sup>  | 3.451    |
| H22A | C37 <sup>2</sup>  | 2.910    | H22A | H28 <sup>2</sup>  | 2.778    |
| H22A | H33A <sup>2</sup> | 2.771    | H22A | H33B <sup>5</sup> | 2.949    |
| H22A | H33B <sup>2</sup> | 3.257    | H22A | H37A <sup>5</sup> | 3.478    |
| H22A | H37A <sup>2</sup> | 2.570    | H22A | H37B <sup>2</sup> | 2.426    |
| H22A | H37C <sup>2</sup> | 3.389    | H22B | C28 <sup>5</sup>  | 3.055    |
| H22B | C29 <sup>5</sup>  | 3.588    | H22B | C36 <sup>5</sup>  | 3.542    |
| H22B | C37 <sup>5</sup>  | 3.327    | H22B | H28 <sup>5</sup>  | 2.585    |
| H22B | H33A <sup>2</sup> | 3.371    | H22B | H33B <sup>5</sup> | 2.741    |
| H22B | H33B <sup>2</sup> | 3.533    | H22B | H36B <sup>5</sup> | 2.710    |
| H22B | H37A <sup>5</sup> | 2.420    | H22C | C33 <sup>2</sup>  | 3.542    |
| H22C | C61 <sup>1</sup>  | 2.995    | H22C | H33A <sup>2</sup> | 2.780    |
| H22C | H36B <sup>5</sup> | 3.276    | H22C | H37A <sup>5</sup> | 3.509    |
| H22C | H61A <sup>1</sup> | 3.299    | H22C | H61B <sup>1</sup> | 2.983    |
| H22C | H61C <sup>1</sup> | 2.297    | H23A | C14 <sup>5</sup>  | 3.142    |
| H23A | C44 <sup>5</sup>  | 3.157    | H23A | H14A <sup>5</sup> | 3.054    |
| H23A | H14B <sup>5</sup> | 3.106    | H23A | H14C <sup>5</sup> | 2.742    |
| H23A | H44A <sup>5</sup> | 3.219    | H23A | H44B <sup>5</sup> | 2.706    |
| H23A | H44C <sup>5</sup> | 3.033    | H23B | C61 <sup>1</sup>  | 3.337    |
| H23B | H14C <sup>5</sup> | 3.188    | H23B | H36B <sup>5</sup> | 3.069    |

Table S12-12. Intermolecular contacts less than 3.60 Å involving hydrogens (continued)

| atom | atom               | distance | atom | atom               | distance |
|------|--------------------|----------|------|--------------------|----------|
| H23B | H61A <sup>1</sup>  | 2.760    | H23B | H61C <sup>1</sup>  | 3.137    |
| H23C | C14 <sup>5</sup>   | 3.356    | H23C | C29 <sup>5</sup>   | 3.550    |
| H23C | C36 <sup>5</sup>   | 3.231    | H23C | C44 <sup>5</sup>   | 3.394    |
| H23C | H14B <sup>5</sup>  | 2.905    | H23C | H14C <sup>5</sup>  | 3.038    |
| H23C | H36A <sup>5</sup>  | 3.171    | H23C | H36B <sup>5</sup>  | 2.486    |
| H23C | H44A <sup>5</sup>  | 3.302    | H23C | H44B <sup>5</sup>  | 3.401    |
| H23C | H44C <sup>5</sup>  | 2.933    | H28  | C22 <sup>7</sup>   | 3.481    |
| H28  | H22A <sup>10</sup> | 2.778    | H28  | H22B <sup>7</sup>  | 2.585    |
| H32B | C14 <sup>4</sup>   | 2.971    | H32B | H21B <sup>7</sup>  | 3.134    |
| H32B | H32B <sup>4</sup>  | 2.983    | H32B | H34C <sup>4</sup>  | 3.540    |
| H32C | C16 <sup>7</sup>   | 2.826    | H32C | C17 <sup>7</sup>   | 2.786    |
| H32C | C18 <sup>7</sup>   | 2.977    | H32C | C19 <sup>7</sup>   | 3.138    |
| H32C | C20 <sup>7</sup>   | 3.062    | H32C | C21 <sup>7</sup>   | 3.517    |
| H32C | H17 <sup>7</sup>   | 3.126    | H32C | H20 <sup>7</sup>   | 3.574    |
| H32C | H21B <sup>7</sup>  | 3.171    | H33A | C22 <sup>10</sup>  | 3.134    |
| H33A | H22A <sup>10</sup> | 2.771    | H33A | H22B <sup>10</sup> | 3.371    |
| H33A | H22C <sup>10</sup> | 2.780    | H33A | H61B <sup>3</sup>  | 3.468    |
| H33A | H61C <sup>3</sup>  | 3.499    | H33B | C17 <sup>7</sup>   | 3.462    |
| H33B | C18 <sup>7</sup>   | 3.329    | H33B | C22 <sup>7</sup>   | 3.130    |
| H33B | C37 <sup>11</sup>  | 3.474    | H33B | H17 <sup>7</sup>   | 3.308    |
| H33B | H22A <sup>7</sup>  | 2.949    | H33B | H22A <sup>10</sup> | 3.257    |
| H33B | H22B <sup>7</sup>  | 2.741    | H33B | H22B <sup>10</sup> | 3.533    |
| H33B | H37A <sup>11</sup> | 2.878    | H33B | H37C <sup>11</sup> | 3.303    |
| H33C | C14 <sup>4</sup>   | 3.248    | H33C | H37A <sup>11</sup> | 3.340    |
| H33C | H37C <sup>11</sup> | 3.240    | H33C | H46A <sup>4</sup>  | 2.951    |
| H33C | H61B <sup>3</sup>  | 3.447    | H34A | H21B <sup>3</sup>  | 2.848    |
| H34B | C60 <sup>3</sup>   | 3.244    | H34B | H21B <sup>3</sup>  | 3.510    |
| H34B | H60B <sup>3</sup>  | 2.857    | H34B | H60C <sup>3</sup>  | 2.786    |
| H34C | C21 <sup>3</sup>   | 3.305    | H34C | C46 <sup>4</sup>   | 3.488    |
| H34C | H21A <sup>3</sup>  | 3.224    | H34C | H21B <sup>3</sup>  | 2.550    |
| H34C | H32B <sup>4</sup>  | 3.540    | H34C | H46A <sup>4</sup>  | 2.991    |
| H34C | H46B <sup>4</sup>  | 3.134    | H34C | H60C <sup>3</sup>  | 2.821    |
| H36A | H23C <sup>7</sup>  | 3.171    | H36B | C22 <sup>7</sup>   | 3.408    |
| H36B | C23 <sup>7</sup>   | 3.199    | H36B | H22B <sup>7</sup>  | 2.710    |
| H36B | H22C <sup>7</sup>  | 3.276    | H36B | H23B <sup>7</sup>  | 3.069    |
| H36B | H23C <sup>7</sup>  | 2.486    | H36B | H42 <sup>12</sup>  | 3.441    |
| H36C | C42 <sup>12</sup>  | 3.068    | H36C | C45 <sup>12</sup>  | 3.511    |

Table S12-12. Intermolecular contacts less than 3.60 Å involving hydrogens (continued)

| atom | atom               | distance | atom | atom               | distance |
|------|--------------------|----------|------|--------------------|----------|
| H36C | H42 <sup>12</sup>  | 2.177    | H36C | H45B <sup>12</sup> | 3.149    |
| H36C | H45C <sup>12</sup> | 3.281    | H36C | H56C <sup>9</sup>  | 3.541    |
| H37A | C22 <sup>7</sup>   | 3.263    | H37A | C22 <sup>10</sup>  | 3.476    |
| H37A | C33 <sup>11</sup>  | 3.460    | H37A | H17 <sup>10</sup>  | 3.296    |
| H37A | H22A <sup>7</sup>  | 3.478    | H37A | H22A <sup>10</sup> | 2.570    |
| H37A | H22B <sup>7</sup>  | 2.420    | H37A | H22C <sup>7</sup>  | 3.509    |
| H37A | H33B <sup>11</sup> | 2.878    | H37A | H33C <sup>11</sup> | 3.340    |
| H37B | C17 <sup>10</sup>  | 3.284    | H37B | C22 <sup>10</sup>  | 3.337    |
| H37B | H17 <sup>10</sup>  | 2.491    | H37B | H22A <sup>10</sup> | 2.426    |
| H37C | C14 <sup>12</sup>  | 3.083    | H37C | H17 <sup>10</sup>  | 2.717    |
| H37C | H22A <sup>10</sup> | 3.389    | H37C | H33B <sup>11</sup> | 3.303    |
| H37C | H33C <sup>11</sup> | 3.240    | H37C | H42 <sup>12</sup>  | 3.280    |
| H38A | H45B <sup>12</sup> | 3.338    | H38B | C45 <sup>12</sup>  | 3.483    |
| H38B | H42 <sup>12</sup>  | 3.544    | H38B | H45B <sup>12</sup> | 2.584    |
| H38C | H10B <sup>10</sup> | 3.320    | H40  | H55A <sup>7</sup>  | 3.594    |
| H40  | H55C <sup>7</sup>  | 2.986    | H42  | C36 <sup>1</sup>   | 3.137    |
| H42  | H36B <sup>1</sup>  | 3.441    | H42  | H36C <sup>1</sup>  | 2.177    |
| H42  | H37C <sup>1</sup>  | 3.280    | H42  | H38B <sup>1</sup>  | 3.544    |
| H42  | H55C <sup>7</sup>  | 3.468    | H42  | H56C <sup>7</sup>  | 2.973    |
| H42  | H61B <sup>7</sup>  | 3.454    | H44A | H23A <sup>7</sup>  | 3.219    |
| H44A | H23C <sup>7</sup>  | 3.302    | H44B | C20 <sup>7</sup>   | 3.348    |
| H44B | C23 <sup>7</sup>   | 3.361    | H44B | H20 <sup>7</sup>   | 2.724    |
| H44B | H23A <sup>7</sup>  | 2.706    | H44B | H23C <sup>7</sup>  | 3.401    |
| H44B | H55B <sup>7</sup>  | 3.570    | H44B | H55C <sup>7</sup>  | 3.398    |
| H44C | C19 <sup>7</sup>   | 3.323    | H44C | C20 <sup>7</sup>   | 3.293    |
| H44C | C23 <sup>7</sup>   | 3.242    | H44C | H20 <sup>7</sup>   | 3.096    |
| H44C | H23A <sup>7</sup>  | 3.033    | H44C | H23C <sup>7</sup>  | 2.933    |
| H45A | C59 <sup>1</sup>   | 3.382    | H45A | H59A <sup>1</sup>  | 3.592    |
| H45A | H59B <sup>1</sup>  | 3.169    | H45A | H59C <sup>1</sup>  | 2.875    |
| H45B | C38 <sup>1</sup>   | 3.373    | H45B | C59 <sup>1</sup>   | 3.069    |
| H45B | H36C <sup>1</sup>  | 3.149    | H45B | H38A <sup>1</sup>  | 3.338    |
| H45B | H38B <sup>1</sup>  | 2.584    | H45B | H59A <sup>1</sup>  | 3.007    |
| H45B | H59B <sup>1</sup>  | 2.656    | H45B | H59C <sup>1</sup>  | 3.034    |
| H45C | C56 <sup>7</sup>   | 3.411    | H45C | C59 <sup>1</sup>   | 3.522    |
| H45C | H15C <sup>1</sup>  | 3.509    | H45C | H36C <sup>1</sup>  | 3.281    |
| H45C | H55A <sup>7</sup>  | 3.359    | H45C | H55C <sup>7</sup>  | 3.209    |
| H45C | H56B <sup>7</sup>  | 3.096    | H45C | H56C <sup>7</sup>  | 2.856    |



Table S12-12. Intermolecular contacts less than 3.60 Å involving hydrogens (continued)

| atom | atom               | distance | atom | atom               | distance |
|------|--------------------|----------|------|--------------------|----------|
| H45C | H59A <sup>1</sup>  | 3.283    | H45C | H59B <sup>1</sup>  | 3.540    |
| H45C | H59C <sup>1</sup>  | 3.171    | H46A | C60 <sup>7</sup>   | 3.539    |
| H46A | H33C <sup>4</sup>  | 2.951    | H46A | H34C <sup>4</sup>  | 2.991    |
| H46A | H60C <sup>7</sup>  | 2.652    | H46A | H61B <sup>7</sup>  | 2.822    |
| H46B | C20 <sup>7</sup>   | 3.530    | H46B | C21 <sup>7</sup>   | 3.468    |
| H46B | H20 <sup>7</sup>   | 3.245    | H46B | H21A <sup>7</sup>  | 3.160    |
| H46B | H21B <sup>7</sup>  | 3.192    | H46B | H34C <sup>4</sup>  | 3.134    |
| H46B | H60C <sup>7</sup>  | 3.578    | H46C | C20 <sup>7</sup>   | 3.566    |
| H46C | C51 <sup>7</sup>   | 3.362    | H46C | C52 <sup>7</sup>   | 3.258    |
| H46C | C53 <sup>7</sup>   | 3.387    | H46C | H1B <sup>7</sup>   | 3.591    |
| H46C | H20 <sup>7</sup>   | 2.876    | H46C | H21A <sup>7</sup>  | 3.080    |
| H46C | H60C <sup>7</sup>  | 3.019    | H55A | C9 <sup>5</sup>    | 3.397    |
| H55A | H9A <sup>5</sup>   | 2.610    | H55A | H9C <sup>5</sup>   | 3.512    |
| H55A | H40 <sup>5</sup>   | 3.594    | H55A | H45C <sup>5</sup>  | 3.359    |
| H55B | H9A <sup>5</sup>   | 3.285    | H55B | H44B <sup>5</sup>  | 3.570    |
| H55C | C39 <sup>5</sup>   | 2.754    | H55C | C40 <sup>5</sup>   | 2.614    |
| H55C | C41 <sup>5</sup>   | 2.675    | H55C | C42 <sup>5</sup>   | 2.903    |
| H55C | C43 <sup>5</sup>   | 2.949    | H55C | C44 <sup>5</sup>   | 3.574    |
| H55C | C45 <sup>5</sup>   | 3.417    | H55C | H40 <sup>5</sup>   | 2.986    |
| H55C | H42 <sup>5</sup>   | 3.468    | H55C | H44B <sup>5</sup>  | 3.398    |
| H55C | H45C <sup>5</sup>  | 3.209    | H56A | H11C <sup>10</sup> | 3.008    |
| H56A | H13B <sup>13</sup> | 3.560    | H56A | H15C <sup>13</sup> | 3.038    |
| H56B | C15 <sup>13</sup>  | 3.449    | H56B | H11C <sup>10</sup> | 3.595    |
| H56B | H15B <sup>13</sup> | 3.494    | H56B | H15C <sup>13</sup> | 2.595    |
| H56B | H45C <sup>5</sup>  | 3.096    | H56B | H69A <sup>14</sup> | 2.993    |
| H56C | C41 <sup>5</sup>   | 3.411    | H56C | C42 <sup>5</sup>   | 3.171    |
| H56C | C45 <sup>5</sup>   | 3.566    | H56C | H15C <sup>13</sup> | 3.115    |
| H56C | H36C <sup>13</sup> | 3.541    | H56C | H42 <sup>5</sup>   | 2.973    |
| H56C | H45C <sup>5</sup>  | 2.856    | H57A | C9 <sup>10</sup>   | 3.334    |
| H57A | C11 <sup>10</sup>  | 3.326    | H57A | H9B <sup>10</sup>  | 2.436    |
| H57A | H10B <sup>10</sup> | 3.020    | H57A | H11C <sup>10</sup> | 2.434    |
| H57B | H9B <sup>10</sup>  | 3.034    | H57C | C9 <sup>10</sup>   | 3.593    |
| H57C | H9B <sup>10</sup>  | 2.763    | H57C | H11C <sup>10</sup> | 3.081    |
| H59A | C45 <sup>12</sup>  | 3.475    | H59A | H45A <sup>12</sup> | 3.592    |
| H59A | H45B <sup>12</sup> | 3.007    | H59A | H45C <sup>12</sup> | 3.283    |
| H59B | C12 <sup>12</sup>  | 3.477    | H59B | C45 <sup>12</sup>  | 3.278    |
| H59B | H45A <sup>12</sup> | 3.169    | H59B | H45B <sup>12</sup> | 2.656    |

Table S12-12. Intermolecular contacts less than 3.60 Å involving hydrogens (continued)

| atom | atom               | distance | atom | atom               | distance |
|------|--------------------|----------|------|--------------------|----------|
| H59B | H45C <sup>12</sup> | 3.540    | H59C | Cl1 <sup>12</sup>  | 3.443    |
| H59C | Cl2 <sup>12</sup>  | 3.520    | H59C | C45 <sup>12</sup>  | 3.206    |
| H59C | H45A <sup>12</sup> | 2.875    | H59C | H45B <sup>12</sup> | 3.034    |
| H59C | H45C <sup>12</sup> | 3.171    | H59C | H69C <sup>6</sup>  | 3.367    |
| H60B | H34B <sup>6</sup>  | 2.857    | H60C | C34 <sup>6</sup>   | 3.252    |
| H60C | C46 <sup>5</sup>   | 3.229    | H60C | H34B <sup>6</sup>  | 2.786    |
| H60C | H34C <sup>6</sup>  | 2.821    | H60C | H46A <sup>5</sup>  | 2.652    |
| H60C | H46B <sup>5</sup>  | 3.578    | H60C | H46C <sup>5</sup>  | 3.019    |
| H61A | Cl2 <sup>12</sup>  | 3.540    | H61A | H22C <sup>12</sup> | 3.299    |
| H61A | H23B <sup>12</sup> | 2.760    | H61B | H22C <sup>12</sup> | 2.983    |
| H61B | H33A <sup>6</sup>  | 3.468    | H61B | H33C <sup>6</sup>  | 3.447    |
| H61B | H42 <sup>5</sup>   | 3.454    | H61B | H46A <sup>5</sup>  | 2.822    |
| H61C | Cl1 <sup>12</sup>  | 3.103    | H61C | Cl2 <sup>12</sup>  | 3.522    |
| H61C | C22 <sup>12</sup>  | 3.264    | H61C | H22C <sup>12</sup> | 2.297    |
| H61C | H23B <sup>12</sup> | 3.137    | H61C | H33A <sup>6</sup>  | 3.499    |
| H65  | C5 <sup>3</sup>    | 3.373    | H65  | C6 <sup>3</sup>    | 3.194    |
| H65  | C12 <sup>3</sup>   | 3.238    | H65  | C13 <sup>3</sup>   | 3.183    |
| H65  | C15 <sup>3</sup>   | 2.992    | H65  | H5 <sup>3</sup>    | 3.308    |
| H65  | H13C <sup>3</sup>  | 2.400    | H65  | H15A <sup>3</sup>  | 3.554    |
| H65  | H15B <sup>3</sup>  | 2.140    | H67A | Cl1 <sup>10</sup>  | 3.154    |
| H67A | H9B <sup>10</sup>  | 2.901    | H67A | H9C <sup>10</sup>  | 3.533    |
| H67A | H10B <sup>10</sup> | 3.044    | H67C | Cl1 <sup>10</sup>  | 3.236    |
| H68A | H10C <sup>3</sup>  | 2.965    | H68A | H21C <sup>3</sup>  | 3.470    |
| H68B | C4 <sup>3</sup>    | 3.541    | H68B | C5 <sup>3</sup>    | 3.507    |
| H68B | C8 <sup>3</sup>    | 3.551    | H68B | C10 <sup>3</sup>   | 3.376    |
| H68B | C11 <sup>3</sup>   | 3.248    | H68B | H5 <sup>3</sup>    | 3.330    |
| H68B | H10C <sup>3</sup>  | 2.531    | H68B | H11B <sup>3</sup>  | 2.360    |
| H68C | C4 <sup>3</sup>    | 3.414    | H68C | C5 <sup>3</sup>    | 3.580    |
| H68C | C10 <sup>3</sup>   | 3.501    | H68C | C21 <sup>3</sup>   | 3.096    |
| H68C | H10C <sup>3</sup>  | 2.676    | H68C | H11B <sup>3</sup>  | 3.483    |
| H68C | H21A <sup>3</sup>  | 3.262    | H68C | H21B <sup>3</sup>  | 3.138    |
| H68C | H21C <sup>3</sup>  | 2.434    | H69A | C15 <sup>3</sup>   | 3.122    |
| H69A | H13C <sup>3</sup>  | 3.509    | H69A | H15B <sup>3</sup>  | 2.333    |
| H69A | H15C <sup>3</sup>  | 3.087    | H69A | H56B <sup>14</sup> | 2.993    |
| H69B | C9 <sup>10</sup>   | 3.345    | H69B | H9A <sup>10</sup>  | 3.578    |
| H69B | H9B <sup>10</sup>  | 2.627    | H69B | H9C <sup>10</sup>  | 3.375    |
| H69C | Cl1 <sup>10</sup>  | 3.045    | H69C | C9 <sup>10</sup>   | 3.434    |

Table S12-12. Intermolecular contacts less than 3.60 Å involving hydrogens (continued)

| atom | atom              | distance | atom | atom              | distance |
|------|-------------------|----------|------|-------------------|----------|
| H69C | H9B <sup>10</sup> | 3.044    | H69C | H9C <sup>10</sup> | 3.000    |
| H69C | H15B <sup>3</sup> | 3.472    | H69C | H59C <sup>3</sup> | 3.367    |

Symmetry Operators:

- |                             |                     |
|-----------------------------|---------------------|
| (1) X+1,Y,Z                 | (2) X+1,-Y+2,Z      |
| (3) X+1,-Y+2,Z+1            | (4) -X+2,-Y+1,-Z+1  |
| (5) -X+1/2+1,Y+1/2,-Z+1/2   | (6) X,-Y+2,Z        |
| (7) -X+1/2+1,Y+1/2-1,-Z+1/2 | (8) -X+1,-Y+1,-Z    |
| (9) -X+1/2,Y+1/2-1,-Z+1/2   | (10) X,-Y+2,Z+1     |
| (11) -X+1,-Y+1,-Z+1         | (12) X-1,Y,Z        |
| (13) -X+1/2,Y+1/2,-Z+1/2    | (14) -X+1,-Y+2,-Z+1 |

X-ray Structure Report

for

[Cp\*TiMe<sub>2</sub>{(O-2,4-<sup>t</sup>Bu<sub>2</sub>C<sub>6</sub>H<sub>2</sub>)-6-CH<sub>2</sub>}]<sub>3</sub>N (**9**)

July 5, 2016

## Experimental

### Data Collection

An orange block crystal of  $C_8H_{12}NO_3Ti_3$  having approximate dimensions of 0.108 x 0.090 x 0.046 mm was mounted on a glass fiber. All measurements were made on a Rigaku XtaLAB P200 diffractometer using multi-layer mirror monochromated Mo-K $\alpha$  radiation.

The crystal-to-detector distance was 45.00 mm.

Cell constants and an orientation matrix for data collection corresponded to a primitive monoclinic cell with dimensions:

$$\begin{aligned} a &= 19.9129(4) \text{ \AA} \\ b &= 19.9654(3) \text{ \AA} & \beta &= 98.7979(19)^\circ \\ c &= 20.1690(4) \text{ \AA} \\ V &= 7924.2(3) \text{ \AA}^3 \end{aligned}$$

For  $Z = 4$  and F.W. = 1308.62, the calculated density is 1.097 g/cm<sup>3</sup>. The reflection conditions of:

$$\begin{aligned} h0l: & h+l = 2n \\ 0k0: & k = 2n \end{aligned}$$

uniquely determine the space group to be:

$$P2_1/n \text{ (#14)}$$

The data were collected at a temperature of  $-180 \pm 1^\circ\text{C}$  to a maximum  $2\theta$  value of  $61.4^\circ$ . A total of 720 oscillation images were collected. A sweep of data was done using  $\omega$  scans from  $-105.0$  to  $75.0^\circ$  in  $0.50^\circ$  step, at  $\chi=45.0^\circ$  and  $\phi = 0.0^\circ$ . The exposure rate was 128.0 [sec./ $^\circ$ ]. The detector swing angle was  $-15.00^\circ$ . A second sweep was performed using  $\omega$  scans from  $-105.0$  to  $75.0^\circ$  in  $0.50^\circ$  step, at  $\chi=45.0^\circ$  and  $\phi = 90.0^\circ$ . The exposure rate was 128.0 [sec./ $^\circ$ ]. The detector swing angle was  $-15.00^\circ$ . The crystal-to-detector distance was 45.00 mm. Readout was performed in the 0.172 mm pixel mode.

## Data Reduction

Of the 0 reflections were collected, where 0 were unique ( $R_{\text{int}} = 0.0458$ ); equivalent reflections were merged. Data were collected and processed using CrysAlisPro (Rigaku Oxford Diffraction).<sup>1</sup>

The linear absorption coefficient,  $\mu$ , for Mo-K $\alpha$  radiation is 3.388 cm<sup>-1</sup>. An empirical absorption correction was applied which resulted in transmission factors ranging from 0.892 to 0.985. The data were corrected for Lorentz and polarization effects.

## Structure Solution and Refinement

The structure was solved by direct methods<sup>2</sup> and expanded using Fourier techniques. The non-hydrogen atoms were refined anisotropically. Hydrogen atoms were refined using the riding model. The final cycle of full-matrix least-squares refinement<sup>3</sup> on  $F^2$  was based on 17594 observed reflections and 805 variable parameters and converged (largest parameter shift was 0.00 times its esd) with unweighted and weighted agreement factors of:

$$R1 = \sum ||F_o| - |F_c|| / \sum |F_o| = 0.0579$$

$$wR2 = [ \sum ( w (F_o^2 - F_c^2)^2 ) / \sum w(F_o^2)^2 ]^{1/2} = 0.1774$$

The goodness of fit<sup>4</sup> was 1.01. Unit weights were used. The maximum and minimum peaks on the final difference Fourier map corresponded to 0.70 and -0.54 e<sup>-</sup>/Å<sup>3</sup>, respectively.

Neutral atom scattering factors were taken from International Tables for Crystallography (IT), Vol. C, Table 6.1.1.4<sup>5</sup>. Anomalous dispersion effects were included in  $F_{\text{calc}}$ <sup>6</sup>; the values for  $\Delta f'$  and  $\Delta f''$  were those of Creagh and McAuley<sup>7</sup>. The values for the mass attenuation coefficients are those of Creagh and Hubbell<sup>8</sup>. All calculations were performed using the CrystalStructure<sup>9</sup> crystallographic software package except for refinement, which was performed using SHELXL Version 2014/7<sup>10</sup>.

## References

(1) CrysAlisPro: Data Collection and Processing Software, Rigaku Corporation (2015). Tokyo 196-8666, Japan.

(2) SHELXT Version 2014/5: Sheldrick, G. M. (2014). Acta Cryst. A70, C1437.

(3) Least Squares function minimized: (SHELXL Version 2014/7)

$$\sum w(F_o^2 - F_c^2)^2 \quad \text{where } w = \text{Least Squares weights.}$$

(4) Goodness of fit is defined as:

$$[\sum w(F_o^2 - F_c^2)^2 / (N_o - N_v)]^{1/2}$$

where:  $N_o$  = number of observations  
 $N_v$  = number of variables

(5) International Tables for Crystallography, Vol.C (1992). Ed. A.J.C. Wilson, Kluwer Academic Publishers, Dordrecht, Netherlands, Table 6.1.1.4, pp. 572.

(6) Ibers, J. A. & Hamilton, W. C.; Acta Crystallogr., 17, 781 (1964).

(7) Creagh, D. C. & McAuley, W.J. ; "International Tables for Crystallography", Vol C, (A.J.C. Wilson, ed.), Kluwer Academic Publishers, Boston, Table 4.2.6.8, pages 219-222 (1992).

(8) Creagh, D. C. & Hubbell, J.H.; "International Tables for Crystallography", Vol C, (A.J.C. Wilson, ed.), Kluwer Academic Publishers, Boston, Table 4.2.4.3, pages 200-206 (1992).

(9) CrystalStructure 4.2: Crystal Structure Analysis Package, Rigaku Corporation (2000-2015). Tokyo 196-8666, Japan.

(10) SHELXL Version 2014/7: Sheldrick, G. M. (2008). Acta Cryst. A64, 112-122.

## EXPERIMENTAL DETAILS

### A. Crystal Data

|                         |                                                                                                                                                              |
|-------------------------|--------------------------------------------------------------------------------------------------------------------------------------------------------------|
| Empirical Formula       | $C_{81}H_{129}NO_3Ti_3$                                                                                                                                      |
| Formula Weight          | 1308.62                                                                                                                                                      |
| Crystal Color, Habit    | orange, block                                                                                                                                                |
| Crystal Dimensions      | 0.108 X 0.090 X 0.046 mm                                                                                                                                     |
| Crystal System          | monoclinic                                                                                                                                                   |
| Lattice Type            | Primitive                                                                                                                                                    |
| Lattice Parameters      | $a = 19.9129(4) \text{ \AA}$<br>$b = 19.9654(3) \text{ \AA}$<br>$c = 20.1690(4) \text{ \AA}$<br>$\beta = 98.7979(19)^\circ$<br>$V = 7924.2(3) \text{ \AA}^3$ |
| Space Group             | $P2_1/n$ (#14)                                                                                                                                               |
| Z value                 | 4                                                                                                                                                            |
| $D_{\text{calc}}$       | $1.097 \text{ g/cm}^3$                                                                                                                                       |
| $F_{000}$               | 2848.00                                                                                                                                                      |
| $\mu(\text{MoK}\alpha)$ | $3.388 \text{ cm}^{-1}$                                                                                                                                      |



## B. Intensity Measurements

|                                                       |                                                                                      |
|-------------------------------------------------------|--------------------------------------------------------------------------------------|
| Diffractometer                                        | XtaLAB P200                                                                          |
| Radiation                                             | MoK $\alpha$ ( $\lambda = 0.71073 \text{ \AA}$ )<br>multi-layer mirror monochromated |
| Voltage, Current                                      | 50kV, 24mA                                                                           |
| Temperature                                           | -180.0°C                                                                             |
| Detector Aperture                                     | 83.8 x 70.0 mm                                                                       |
| Data Images                                           | 720 exposures                                                                        |
| $\omega$ oscillation Range ( $\chi=45.0, \phi=0.0$ )  | -105.0 - 75.0°                                                                       |
| Exposure Rate                                         | 128.0 sec./°                                                                         |
| Detector Swing Angle                                  | -15.00°                                                                              |
| $\omega$ oscillation Range ( $\chi=45.0, \phi=90.0$ ) | -105.0 - 75.0°                                                                       |
| Exposure Rate                                         | 128.0 sec./°                                                                         |
| Detector Swing Angle                                  | -15.00°                                                                              |
| Detector Position                                     | 45.00 mm                                                                             |
| Pixel Size                                            | 0.172 mm                                                                             |
| $2\theta_{\max}$                                      | 55.0°                                                                                |
| No. of Reflections Measured                           | Total: 65232<br>Unique: 17594 ( $R_{\text{int}} = 0.0458$ )                          |
| Corrections                                           | Lorentz-polarization<br>Absorption<br>(trans. factors: 0.892 - 0.985)                |

### C. Structure Solution and Refinement

|                                     |                                                                                                                        |
|-------------------------------------|------------------------------------------------------------------------------------------------------------------------|
| Structure Solution<br>2014/5)       | Direct Methods (SHELXT Version                                                                                         |
| Refinement                          | Full-matrix least-squares on F <sup>2</sup>                                                                            |
| Function Minimized                  | $\sum w (F_o^2 - F_c^2)^2$                                                                                             |
| Least Squares Weights               | $w = 1 / [ \sigma^2(F_o^2) + (0.0987 \cdot P)^2 + 9.4361 \cdot P ]$<br>where $P = (\text{Max}(F_o^2, 0) + 2F_c^2) / 3$ |
| 2 $\theta_{\text{max}}$ cutoff      | 55.0 $^\circ$                                                                                                          |
| Anomalous Dispersion                | All non-hydrogen atoms                                                                                                 |
| No. Observations (All reflections)  | 17594                                                                                                                  |
| No. Variables                       | 805                                                                                                                    |
| Reflection/Parameter Ratio          | 21.86                                                                                                                  |
| Residuals: R1 (I>2.00 $\sigma$ (I)) | 0.0579                                                                                                                 |
| Residuals: R (All reflections)      | 0.0738                                                                                                                 |
| Residuals: wR2 (All reflections)    | 0.1774                                                                                                                 |
| Goodness of Fit Indicator           | 1.008                                                                                                                  |
| Max Shift/Error in Final Cycle      | 0.001                                                                                                                  |
| Maximum peak in Final Diff. Map     | 0.70 e <sup>-</sup> /Å <sup>3</sup>                                                                                    |
| Minimum peak in Final Diff. Map     | -0.54 e <sup>-</sup> /Å <sup>3</sup>                                                                                   |

Table S13-1. Atomic coordinates and  $B_{iso}/B_{eq}$ 

| atom | x           | y           | z           | $B_{eq}$  |
|------|-------------|-------------|-------------|-----------|
| Ti1  | 0.51189(2)  | 0.53696(2)  | 0.80883(2)  | 1.449(8)  |
| Ti2  | 0.38246(2)  | 0.74257(2)  | 0.52058(2)  | 1.896(9)  |
| Ti3  | 0.23200(2)  | 0.78453(2)  | 0.84358(2)  | 2.138(10) |
| O1   | 0.56716(8)  | 0.59880(7)  | 0.77837(8)  | 1.43(3)   |
| O2   | 0.38485(8)  | 0.82087(8)  | 0.56738(8)  | 1.70(3)   |
| O3   | 0.31436(9)  | 0.79177(9)  | 0.89587(8)  | 1.90(3)   |
| N1   | 0.46332(10) | 0.78258(9)  | 0.76986(9)  | 1.39(3)   |
| C1   | 0.49686(11) | 0.71843(11) | 0.78711(12) | 1.46(3)   |
| C2   | 0.56817(11) | 0.71698(11) | 0.76961(11) | 1.31(3)   |
| C3   | 0.60027(12) | 0.77616(11) | 0.75657(11) | 1.44(3)   |
| C4   | 0.66531(12) | 0.77651(11) | 0.73918(11) | 1.49(3)   |
| C5   | 0.69755(12) | 0.71491(11) | 0.73597(11) | 1.52(3)   |
| C6   | 0.66790(11) | 0.65357(11) | 0.74903(11) | 1.38(3)   |
| C7   | 0.60183(11) | 0.65562(10) | 0.76621(11) | 1.29(3)   |
| C8   | 0.70527(12) | 0.58741(11) | 0.74233(12) | 1.58(4)   |
| C9   | 0.66657(14) | 0.54737(12) | 0.68303(13) | 2.13(4)   |
| C10  | 0.71094(13) | 0.54745(12) | 0.80823(13) | 2.03(4)   |
| C11  | 0.77812(13) | 0.59833(12) | 0.72830(15) | 2.28(4)   |
| C12  | 0.69744(12) | 0.84386(11) | 0.72412(12) | 1.77(4)   |
| C13  | 0.65517(16) | 0.87582(14) | 0.66235(15) | 2.99(5)   |
| C14  | 0.69725(15) | 0.89052(13) | 0.78468(14) | 2.50(5)   |
| C15  | 0.77069(14) | 0.83611(13) | 0.71128(15) | 2.50(5)   |
| C16  | 0.41694(13) | 0.54836(13) | 0.74587(13) | 2.23(4)   |
| C17  | 0.53980(14) | 0.44702(12) | 0.76293(13) | 2.27(4)   |
| C18  | 0.54111(13) | 0.56763(12) | 0.92306(12) | 1.91(4)   |
| C19  | 0.46942(13) | 0.57327(12) | 0.90735(12) | 1.98(4)   |
| C20  | 0.44202(13) | 0.50791(12) | 0.89187(12) | 1.97(4)   |
| C21  | 0.49687(13) | 0.46216(11) | 0.89926(12) | 1.84(4)   |
| C22  | 0.55811(13) | 0.49878(12) | 0.91783(12) | 1.83(4)   |
| C23  | 0.62740(13) | 0.46798(13) | 0.93317(14) | 2.35(4)   |
| C24  | 0.49088(14) | 0.38733(12) | 0.89464(14) | 2.35(4)   |
| C25  | 0.36819(14) | 0.49069(15) | 0.87749(15) | 2.79(5)   |
| C26  | 0.42673(17) | 0.63484(14) | 0.91146(16) | 2.68(5)   |
| C27  | 0.59092(15) | 0.62362(13) | 0.94310(13) | 2.43(5)   |
| C28  | 0.44177(12) | 0.78790(11) | 0.69720(11) | 1.52(4)   |
| C29  | 0.43477(11) | 0.86012(11) | 0.67391(11) | 1.42(3)   |
| C30  | 0.45830(12) | 0.91215(11) | 0.71731(11) | 1.58(4)   |

Table S13-1. Atomic coordinates and  $B_{\text{iso}}/B_{\text{eq}}$  (continued)

| atom | x           | y           | z           | $B_{\text{eq}}$ |
|------|-------------|-------------|-------------|-----------------|
| C31  | 0.44960(13) | 0.97879(12) | 0.69776(12) | 1.84(4)         |
| C32  | 0.41449(13) | 0.99153(12) | 0.63391(12) | 1.98(4)         |
| C33  | 0.38917(12) | 0.94131(12) | 0.58818(12) | 1.83(4)         |
| C34  | 0.40318(12) | 0.87426(11) | 0.60867(11) | 1.56(4)         |
| C35  | 0.34551(14) | 0.95877(13) | 0.52056(13) | 2.29(4)         |
| C36  | 0.27657(14) | 0.92353(15) | 0.51770(14) | 2.75(5)         |
| C37  | 0.33206(17) | 1.03405(15) | 0.51315(16) | 3.25(6)         |
| C38  | 0.38088(15) | 0.93641(16) | 0.46149(13) | 2.72(5)         |
| C39  | 0.47549(14) | 1.03649(12) | 0.74549(13) | 2.27(4)         |
| C40  | 0.51479(18) | 1.01166(15) | 0.81225(15) | 3.34(6)         |
| C41  | 0.4149(2)   | 1.07719(17) | 0.76212(19) | 4.17(7)         |
| C42  | 0.5216(2)   | 1.0818(2)   | 0.71242(17) | 4.61(8)         |
| C43  | 0.29267(15) | 0.75619(16) | 0.45033(15) | 3.06(5)         |
| C44  | 0.34185(16) | 0.67051(14) | 0.58196(14) | 2.86(5)         |
| C45  | 0.49896(15) | 0.71030(16) | 0.52701(14) | 2.83(5)         |
| C46  | 0.46034(17) | 0.65233(15) | 0.50658(16) | 3.27(6)         |
| C47  | 0.42250(16) | 0.66656(16) | 0.44239(15) | 3.08(5)         |
| C48  | 0.43813(15) | 0.73242(16) | 0.42500(14) | 2.81(5)         |
| C49  | 0.48554(14) | 0.75904(15) | 0.47756(14) | 2.71(5)         |
| C50  | 0.52086(16) | 0.82657(17) | 0.47982(17) | 3.36(6)         |
| C51  | 0.41261(18) | 0.7656(2)   | 0.35875(15) | 3.84(6)         |
| C52  | 0.3775(2)   | 0.61706(19) | 0.40028(19) | 4.39(7)         |
| C53  | 0.4655(2)   | 0.58547(18) | 0.5415(2)   | 4.78(8)         |
| C54  | 0.55353(17) | 0.7158(2)   | 0.58807(16) | 4.03(7)         |
| C55  | 0.40611(12) | 0.79304(12) | 0.80584(11) | 1.59(4)         |
| C56  | 0.42788(12) | 0.81186(11) | 0.87888(11) | 1.57(4)         |
| C57  | 0.49376(12) | 0.83109(12) | 0.90294(12) | 1.81(4)         |
| C58  | 0.51467(13) | 0.84485(13) | 0.97088(12) | 2.11(4)         |
| C59  | 0.46681(14) | 0.83537(14) | 1.01400(12) | 2.27(4)         |
| C60  | 0.39976(13) | 0.81557(12) | 0.99282(12) | 2.00(4)         |
| C61  | 0.37991(12) | 0.80703(12) | 0.92288(12) | 1.66(4)         |
| C62  | 0.35178(14) | 0.79933(14) | 1.04370(13) | 2.38(4)         |
| C63  | 0.32815(16) | 0.72599(14) | 1.03385(14) | 2.72(5)         |
| C64  | 0.38725(16) | 0.80582(17) | 1.11674(13) | 3.03(5)         |
| C65  | 0.29004(15) | 0.84710(16) | 1.03409(14) | 2.88(5)         |
| C66  | 0.58737(14) | 0.86765(16) | 0.99854(14) | 2.75(5)         |
| C67  | 0.58397(19) | 0.9376(2)   | 1.0299(2)   | 4.67(8)         |

Table S13-1. Atomic coordinates and  $B_{\text{iso}}/B_{\text{eq}}$  (continued)

| atom | x           | y           | z           | $B_{\text{eq}}$ |
|------|-------------|-------------|-------------|-----------------|
| C68  | 0.61926(18) | 0.8185(2)   | 1.05315(18) | 4.54(8)         |
| C69  | 0.63299(17) | 0.8712(2)   | 0.94495(16) | 3.91(7)         |
| C70  | 0.17516(15) | 0.73121(18) | 0.90764(17) | 3.45(6)         |
| C71  | 0.24490(15) | 0.70104(15) | 0.78119(17) | 3.15(5)         |
| C72  | 0.22593(14) | 0.88665(14) | 0.78173(16) | 2.67(5)         |
| C73  | 0.19311(15) | 0.89818(14) | 0.83786(15) | 2.81(5)         |
| C74  | 0.13470(14) | 0.85720(14) | 0.83080(14) | 2.66(5)         |
| C75  | 0.13138(14) | 0.82031(14) | 0.77091(15) | 2.63(5)         |
| C76  | 0.18878(15) | 0.83851(13) | 0.73977(14) | 2.68(5)         |
| C77  | 0.20328(19) | 0.81483(17) | 0.67241(16) | 3.73(6)         |
| C78  | 0.28578(16) | 0.92730(16) | 0.7658(2)   | 3.90(7)         |
| C79  | 0.07628(16) | 0.77140(16) | 0.74448(18) | 3.40(6)         |
| C80  | 0.08106(17) | 0.85898(19) | 0.87654(17) | 3.75(6)         |
| C81  | 0.2141(2)   | 0.94940(17) | 0.89150(19) | 4.12(7)         |

$$B_{\text{eq}} = 8/3 \pi^2 (U_{11}(aa^*)^2 + U_{22}(bb^*)^2 + U_{33}(cc^*)^2 + 2U_{12}(aa^*bb^*)\cos \gamma + 2U_{13}(aa^*cc^*)\cos \beta + 2U_{23}(bb^*cc^*)\cos \alpha)$$

Table S13-2. Atomic coordinates and  $B_{\text{iso}}$  involving hydrogen atoms

| atom | x       | y       | z       | $B_{\text{iso}}$ |
|------|---------|---------|---------|------------------|
| H1A  | 0.46973 | 0.68206 | 0.76271 | 1.750            |
| H1B  | 0.49892 | 0.71020 | 0.83579 | 1.750            |
| H3   | 0.57730 | 0.81749 | 0.75957 | 1.734            |
| H5   | 0.74200 | 0.71445 | 0.72431 | 1.829            |
| H9A  | 0.69011 | 0.50493 | 0.67833 | 2.555            |
| H9B  | 0.62025 | 0.53828 | 0.69145 | 2.555            |
| H9C  | 0.66477 | 0.57348 | 0.64165 | 2.555            |
| H10A | 0.73489 | 0.50525 | 0.80346 | 2.441            |
| H10B | 0.73621 | 0.57378 | 0.84481 | 2.441            |
| H10C | 0.66532 | 0.53787 | 0.81836 | 2.441            |
| H11A | 0.80001 | 0.55484 | 0.72441 | 2.736            |
| H11B | 0.77696 | 0.62329 | 0.68631 | 2.736            |
| H11C | 0.80389 | 0.62381 | 0.76524 | 2.736            |
| H13A | 0.60806 | 0.88098 | 0.67017 | 3.582            |
| H13B | 0.67402 | 0.91988 | 0.65420 | 3.582            |
| H13C | 0.65637 | 0.84706 | 0.62317 | 3.582            |
| H14A | 0.65058 | 0.89608 | 0.79367 | 2.995            |
| H14B | 0.72527 | 0.87096 | 0.82411 | 2.995            |
| H14C | 0.71579 | 0.93426 | 0.77489 | 2.995            |
| H15A | 0.79811 | 0.81568 | 0.75058 | 3.003            |
| H15B | 0.77165 | 0.80743 | 0.67200 | 3.003            |
| H15C | 0.78930 | 0.88024 | 0.70302 | 3.003            |
| H16A | 0.38422 | 0.51639 | 0.75936 | 2.673            |
| H16B | 0.40016 | 0.59408 | 0.74999 | 2.673            |
| H16C | 0.42261 | 0.53988 | 0.69919 | 2.673            |
| H17A | 0.51274 | 0.40965 | 0.77605 | 2.724            |
| H17B | 0.53132 | 0.45211 | 0.71404 | 2.724            |
| H17C | 0.58815 | 0.43797 | 0.77762 | 2.724            |
| H23A | 0.66135 | 0.50332 | 0.94465 | 2.816            |
| H23B | 0.62873 | 0.43710 | 0.97112 | 2.816            |
| H23C | 0.63743 | 0.44339 | 0.89379 | 2.816            |
| H24A | 0.53637 | 0.36735 | 0.90163 | 2.820            |
| H24B | 0.46520 | 0.37095 | 0.92911 | 2.820            |
| H24C | 0.46715 | 0.37481 | 0.85018 | 2.820            |
| H25A | 0.34115 | 0.53188 | 0.87490 | 3.343            |
| H25B | 0.35877 | 0.46672 | 0.83467 | 3.343            |
| H25C | 0.35622 | 0.46217 | 0.91346 | 3.343            |

Table S13-2. Atomic coordinates and  $B_{\text{iso}}$  involving hydrogens/ $B_{\text{eq}}$  (continued)

| atom | x       | y       | z       | $B_{\text{eq}}$ |
|------|---------|---------|---------|-----------------|
| H27A | 0.63719 | 0.60549 | 0.95104 | 2.919           |
| H27B | 0.58726 | 0.65696 | 0.90707 | 2.919           |
| H27C | 0.58068 | 0.64481 | 0.98424 | 2.919           |
| H28A | 0.39758 | 0.76487 | 0.68498 | 1.827           |
| H28B | 0.47543 | 0.76497 | 0.67373 | 1.827           |
| H30  | 0.48074 | 0.90193 | 0.76115 | 1.891           |
| H32  | 0.40725 | 1.03690 | 0.62050 | 2.378           |
| H36A | 0.28368 | 0.87508 | 0.52233 | 3.305           |
| H36B | 0.25379 | 0.93986 | 0.55432 | 3.305           |
| H36C | 0.24825 | 0.93315 | 0.47460 | 3.305           |
| H37A | 0.37533 | 1.05786 | 0.51480 | 3.895           |
| H37B | 0.30336 | 1.04290 | 0.47009 | 3.895           |
| H37C | 0.30890 | 1.04962 | 0.54981 | 3.895           |
| H38A | 0.39015 | 0.88823 | 0.46493 | 3.259           |
| H38B | 0.35126 | 0.94590 | 0.41911 | 3.259           |
| H38C | 0.42373 | 0.96087 | 0.46285 | 3.259           |
| H40A | 0.48556 | 0.98223 | 0.83427 | 4.007           |
| H40B | 0.55508 | 0.98680 | 0.80384 | 4.007           |
| H40C | 0.52885 | 1.05008 | 0.84132 | 4.007           |
| H41A | 0.38490 | 1.04799 | 0.78351 | 5.008           |
| H41B | 0.43133 | 1.11376 | 0.79274 | 5.008           |
| H41C | 0.38958 | 1.09581 | 0.72071 | 5.008           |
| H42A | 0.56043 | 1.05596 | 0.70175 | 5.533           |
| H42B | 0.49630 | 1.10045 | 0.67105 | 5.533           |
| H42C | 0.53806 | 1.11840 | 0.74309 | 5.533           |
| H43A | 0.28512 | 0.71674 | 0.42123 | 3.677           |
| H43B | 0.25386 | 0.76217 | 0.47434 | 3.677           |
| H43C | 0.29758 | 0.79595 | 0.42298 | 3.677           |
| H44A | 0.33911 | 0.62678 | 0.55965 | 3.438           |
| H44B | 0.37150 | 0.66718 | 0.62534 | 3.438           |
| H44C | 0.29632 | 0.68450 | 0.58906 | 3.438           |
| H50A | 0.50303 | 0.85231 | 0.43960 | 4.030           |
| H50B | 0.51251 | 0.85115 | 0.51982 | 4.030           |
| H50C | 0.56984 | 0.81984 | 0.48151 | 4.030           |
| H51A | 0.38003 | 0.73603 | 0.33166 | 4.606           |
| H51B | 0.39027 | 0.80797 | 0.36674 | 4.606           |
| H51C | 0.45097 | 0.77447 | 0.33481 | 4.606           |

Table S13-2. Atomic coordinates and  $B_{\text{iso}}$  involving hydrogens/ $B_{\text{eq}}$  (continued)

| atom | x       | y       | z       | $B_{\text{eq}}$ |
|------|---------|---------|---------|-----------------|
| H52A | 0.37596 | 0.57514 | 0.42527 | 5.273           |
| H52B | 0.33155 | 0.63552 | 0.38948 | 5.273           |
| H52C | 0.39580 | 0.60831 | 0.35867 | 5.273           |
| H53A | 0.43293 | 0.55422 | 0.51670 | 5.741           |
| H53B | 0.51164 | 0.56780 | 0.54336 | 5.741           |
| H53C | 0.45520 | 0.59088 | 0.58720 | 5.741           |
| H54A | 0.55321 | 0.67530 | 0.61551 | 4.832           |
| H54B | 0.59807 | 0.72056 | 0.57357 | 4.832           |
| H54C | 0.54459 | 0.75501 | 0.61459 | 4.832           |
| H55A | 0.37867 | 0.75152 | 0.80359 | 1.903           |
| H55B | 0.37690 | 0.82904 | 0.78335 | 1.903           |
| H57  | 0.52560 | 0.83506 | 0.87256 | 2.167           |
| H59  | 0.48079 | 0.84287 | 1.06058 | 2.730           |
| H63A | 0.30518 | 0.71969 | 0.98772 | 3.259           |
| H63B | 0.36764 | 0.69619 | 1.04233 | 3.259           |
| H63C | 0.29662 | 0.71547 | 1.06523 | 3.259           |
| H64A | 0.35492 | 0.79507 | 1.14725 | 3.630           |
| H64B | 0.42573 | 0.77473 | 1.12452 | 3.630           |
| H64C | 0.40368 | 0.85179 | 1.12496 | 3.630           |
| H65A | 0.26656 | 0.84385 | 0.98782 | 3.453           |
| H65B | 0.25877 | 0.83455 | 1.06508 | 3.453           |
| H65C | 0.30562 | 0.89321 | 1.04328 | 3.453           |
| H67A | 0.55460 | 0.93595 | 1.06468 | 5.599           |
| H67B | 0.62974 | 0.95165 | 1.04995 | 5.599           |
| H67C | 0.56540 | 0.96962 | 0.99508 | 5.599           |
| H68A | 0.59041 | 0.81548 | 1.08829 | 5.445           |
| H68B | 0.62316 | 0.77412 | 1.03325 | 5.445           |
| H68C | 0.66450 | 0.83446 | 1.07269 | 5.445           |
| H69A | 0.61346 | 0.90241 | 0.90966 | 4.693           |
| H69B | 0.67817 | 0.88700 | 0.96500 | 4.693           |
| H69C | 0.63683 | 0.82666 | 0.92556 | 4.693           |
| H70A | 0.12875 | 0.72409 | 0.88447 | 4.135           |
| H70B | 0.19676 | 0.68780 | 0.91929 | 4.135           |
| H70C | 0.17380 | 0.75719 | 0.94864 | 4.135           |
| H71A | 0.20254 | 0.69284 | 0.75057 | 3.774           |
| H71B | 0.28151 | 0.71049 | 0.75513 | 3.774           |
| H71C | 0.25660 | 0.66132 | 0.80914 | 3.774           |



Table S13-2. Atomic coordinates and  $B_{\text{iso}}$  involving hydrogens/ $B_{\text{eq}}$  (continued)

| atom | x          | y          | z          | $B_{\text{eq}}$ |
|------|------------|------------|------------|-----------------|
| H77A | 0.16946    | 0.78125    | 0.65439    | 4.475           |
| H77B | 0.20104    | 0.85293    | 0.64151    | 4.475           |
| H77C | 0.24877    | 0.79493    | 0.67754    | 4.475           |
| H78A | 0.30004    | 0.91026    | 0.72452    | 4.681           |
| H78B | 0.27241    | 0.97440    | 0.75957    | 4.681           |
| H78C | 0.32359    | 0.92353    | 0.80288    | 4.681           |
| H79A | 0.08572    | 0.75244    | 0.70204    | 4.080           |
| H79B | 0.07484    | 0.73533    | 0.77718    | 4.080           |
| H79C | 0.03238    | 0.79456    | 0.73698    | 4.080           |
| H80A | 0.09610    | 0.88856    | 0.91470    | 4.495           |
| H80B | 0.03831    | 0.87586    | 0.85158    | 4.495           |
| H80C | 0.07406    | 0.81369    | 0.89291    | 4.495           |
| H81A | 0.18321    | 0.94750    | 0.92487    | 4.943           |
| H81B | 0.26060    | 0.94001    | 0.91332    | 4.943           |
| H81C | 0.21232    | 0.99415    | 0.87132    | 4.943           |
| H26A | 0.4544(16) | 0.6742(17) | 0.9256(15) | 2.6(6)          |
| H26B | 0.4001(16) | 0.6436(15) | 0.8678(17) | 2.5(6)          |
| H26C | 0.396(2)   | 0.629(2)   | 0.940(2)   | 5.6(10)         |

Table S13-3. Anisotropic displacement parameters

| atom | U <sub>11</sub> | U <sub>22</sub> | U <sub>33</sub> | U <sub>12</sub> | U <sub>13</sub> | U <sub>23</sub> |
|------|-----------------|-----------------|-----------------|-----------------|-----------------|-----------------|
| Ti1  | 0.0205(2)       | 0.01470(19)     | 0.0209(2)       | -0.00340(15)    | 0.00641(16)     | 0.00136(14)     |
| Ti2  | 0.0257(3)       | 0.0262(2)       | 0.0200(2)       | -0.00084(17)    | 0.00294(17)     | -0.00376(16)    |
| Ti3  | 0.0201(2)       | 0.0285(2)       | 0.0335(3)       | 0.00007(17)     | 0.00693(19)     | 0.00611(18)     |
| O1   | 0.0204(8)       | 0.0143(7)       | 0.0209(8)       | -0.0021(6)      | 0.0075(6)       | 0.0014(6)       |
| O2   | 0.0228(9)       | 0.0248(8)       | 0.0172(8)       | 0.0012(7)       | 0.0036(7)       | -0.0012(6)      |
| O3   | 0.0211(9)       | 0.0282(9)       | 0.0245(8)       | 0.0022(7)       | 0.0087(7)       | 0.0026(7)       |
| N1   | 0.0197(10)      | 0.0169(9)       | 0.0172(9)       | 0.0039(7)       | 0.0059(7)       | 0.0019(7)       |
| C1   | 0.0174(11)      | 0.0162(10)      | 0.0229(11)      | 0.0005(8)       | 0.0067(9)       | 0.0037(8)       |
| C2   | 0.0168(11)      | 0.0160(10)      | 0.0176(10)      | -0.0003(8)      | 0.0045(8)       | 0.0007(8)       |
| C3   | 0.0212(12)      | 0.0143(10)      | 0.0204(11)      | 0.0014(8)       | 0.0063(9)       | 0.0012(8)       |
| C4   | 0.0215(12)      | 0.0164(10)      | 0.0192(11)      | -0.0031(8)      | 0.0048(9)       | 0.0021(8)       |
| C5   | 0.0182(11)      | 0.0197(11)      | 0.0211(11)      | -0.0020(8)      | 0.0061(9)       | 0.0003(8)       |
| C6   | 0.0198(11)      | 0.0158(10)      | 0.0176(10)      | 0.0006(8)       | 0.0048(9)       | 0.0008(8)       |
| C7   | 0.0190(11)      | 0.0144(10)      | 0.0157(10)      | -0.0024(8)      | 0.0030(8)       | 0.0015(8)       |
| C8   | 0.0192(11)      | 0.0158(10)      | 0.0262(12)      | 0.0015(8)       | 0.0074(9)       | 0.0010(8)       |
| C9   | 0.0340(14)      | 0.0200(11)      | 0.0284(13)      | 0.0028(10)      | 0.0094(11)      | -0.0046(9)      |
| C10  | 0.0263(13)      | 0.0212(11)      | 0.0309(13)      | 0.0056(9)       | 0.0078(10)      | 0.0054(9)       |
| C11  | 0.0238(13)      | 0.0213(12)      | 0.0448(15)      | 0.0037(9)       | 0.0157(11)      | 0.0010(10)      |
| C12  | 0.0246(12)      | 0.0165(10)      | 0.0278(12)      | -0.0046(9)      | 0.0089(10)      | 0.0009(9)       |
| C13  | 0.0451(17)      | 0.0301(14)      | 0.0369(15)      | -0.0124(12)     | 0.0022(13)      | 0.0143(12)      |
| C14  | 0.0369(15)      | 0.0207(12)      | 0.0404(15)      | -0.0084(10)     | 0.0161(12)      | -0.0061(10)     |
| C15  | 0.0345(15)      | 0.0225(12)      | 0.0419(15)      | -0.0071(10)     | 0.0181(12)      | -0.0006(11)     |
| C16  | 0.0260(13)      | 0.0298(13)      | 0.0287(13)      | -0.0053(10)     | 0.0037(10)      | 0.0031(10)      |
| C17  | 0.0376(15)      | 0.0210(12)      | 0.0295(13)      | -0.0095(10)     | 0.0109(11)      | -0.0020(10)     |
| C18  | 0.0347(14)      | 0.0203(11)      | 0.0188(11)      | -0.0051(10)     | 0.0083(10)      | 0.0019(9)       |
| C19  | 0.0343(14)      | 0.0216(11)      | 0.0220(11)      | -0.0004(10)     | 0.0133(10)      | 0.0037(9)       |
| C20  | 0.0275(13)      | 0.0252(12)      | 0.0245(12)      | -0.0027(10)     | 0.0119(10)      | 0.0057(9)       |
| C21  | 0.0297(13)      | 0.0188(11)      | 0.0231(11)      | -0.0056(9)      | 0.0092(10)      | 0.0038(9)       |
| C22  | 0.0292(13)      | 0.0206(11)      | 0.0204(11)      | -0.0037(9)      | 0.0061(10)      | 0.0043(9)       |
| C23  | 0.0285(14)      | 0.0290(13)      | 0.0306(13)      | -0.0032(10)     | 0.0013(11)      | 0.0077(10)      |
| C24  | 0.0355(15)      | 0.0203(12)      | 0.0345(14)      | -0.0047(10)     | 0.0087(11)      | 0.0051(10)      |
| C25  | 0.0280(14)      | 0.0366(15)      | 0.0445(16)      | -0.0045(11)     | 0.0160(12)      | 0.0100(12)      |
| C26  | 0.0462(17)      | 0.0248(13)      | 0.0369(15)      | 0.0048(12)      | 0.0256(14)      | 0.0069(11)      |
| C27  | 0.0414(16)      | 0.0249(12)      | 0.0261(13)      | -0.0081(11)     | 0.0049(11)      | 0.0004(10)      |
| C28  | 0.0238(12)      | 0.0169(10)      | 0.0174(10)      | 0.0018(8)       | 0.0040(9)       | 0.0001(8)       |
| C29  | 0.0190(11)      | 0.0185(10)      | 0.0174(10)      | 0.0027(8)       | 0.0062(9)       | 0.0008(8)       |
| C30  | 0.0227(12)      | 0.0198(11)      | 0.0184(10)      | 0.0030(9)       | 0.0061(9)       | 0.0003(8)       |

Table S13-3. Anisotropic displacement parameters (continued)

| atom | U <sub>11</sub> | U <sub>22</sub> | U <sub>33</sub> | U <sub>12</sub> | U <sub>13</sub> | U <sub>23</sub> |
|------|-----------------|-----------------|-----------------|-----------------|-----------------|-----------------|
| C31  | 0.0284(13)      | 0.0187(11)      | 0.0249(12)      | 0.0004(9)       | 0.0105(10)      | -0.0004(9)      |
| C32  | 0.0300(13)      | 0.0192(11)      | 0.0274(12)      | 0.0038(9)       | 0.0084(10)      | 0.0057(9)       |
| C33  | 0.0238(12)      | 0.0264(12)      | 0.0204(11)      | 0.0052(9)       | 0.0065(9)       | 0.0055(9)       |
| C34  | 0.0195(12)      | 0.0212(11)      | 0.0199(11)      | 0.0011(9)       | 0.0076(9)       | 0.0004(8)       |
| C35  | 0.0332(14)      | 0.0308(13)      | 0.0223(12)      | 0.0071(11)      | 0.0021(11)      | 0.0075(10)      |
| C36  | 0.0273(14)      | 0.0439(16)      | 0.0326(14)      | 0.0087(12)      | 0.0018(11)      | 0.0069(12)      |
| C37  | 0.0487(19)      | 0.0377(16)      | 0.0344(15)      | 0.0108(13)      | -0.0020(13)     | 0.0132(12)      |
| C38  | 0.0350(15)      | 0.0472(16)      | 0.0208(12)      | 0.0022(12)      | 0.0035(11)      | 0.0098(11)      |
| C39  | 0.0386(15)      | 0.0186(11)      | 0.0294(13)      | -0.0012(10)     | 0.0068(11)      | -0.0010(9)      |
| C40  | 0.064(2)        | 0.0282(14)      | 0.0319(15)      | -0.0016(13)     | 0.0001(14)      | -0.0061(11)     |
| C41  | 0.066(2)        | 0.0347(17)      | 0.057(2)        | 0.0095(15)      | 0.0057(18)      | -0.0160(15)     |
| C42  | 0.080(3)        | 0.058(2)        | 0.0376(17)      | -0.038(2)       | 0.0104(17)      | -0.0045(15)     |
| C43  | 0.0318(16)      | 0.0458(17)      | 0.0366(15)      | -0.0022(13)     | -0.0017(12)     | -0.0091(13)     |
| C44  | 0.0473(18)      | 0.0291(14)      | 0.0325(14)      | -0.0081(12)     | 0.0064(13)      | -0.0055(11)     |
| C45  | 0.0319(15)      | 0.0499(17)      | 0.0269(13)      | 0.0096(12)      | 0.0077(11)      | -0.0142(12)     |
| C46  | 0.0516(19)      | 0.0347(15)      | 0.0410(16)      | 0.0130(13)      | 0.0165(14)      | -0.0020(12)     |
| C47  | 0.0395(17)      | 0.0427(16)      | 0.0357(15)      | -0.0037(13)     | 0.0084(13)      | -0.0207(13)     |
| C48  | 0.0330(15)      | 0.0492(17)      | 0.0264(13)      | 0.0033(12)      | 0.0106(12)      | -0.0030(12)     |
| C49  | 0.0279(14)      | 0.0428(16)      | 0.0344(14)      | 0.0024(12)      | 0.0117(12)      | -0.0101(12)     |
| C50  | 0.0312(16)      | 0.0513(18)      | 0.0480(18)      | -0.0037(13)     | 0.0151(14)      | -0.0090(14)     |
| C51  | 0.047(2)        | 0.071(2)        | 0.0281(15)      | 0.0019(17)      | 0.0077(14)      | 0.0052(15)      |
| C52  | 0.061(2)        | 0.054(2)        | 0.053(2)        | -0.0132(17)     | 0.0131(17)      | -0.0262(17)     |
| C53  | 0.081(3)        | 0.0415(19)      | 0.062(2)        | 0.0210(18)      | 0.019(2)        | 0.0011(16)      |
| C54  | 0.0368(18)      | 0.084(3)        | 0.0314(16)      | 0.0220(17)      | 0.0027(13)      | -0.0115(16)     |
| C55  | 0.0190(12)      | 0.0217(11)      | 0.0205(11)      | 0.0021(9)       | 0.0058(9)       | 0.0006(8)       |
| C56  | 0.0235(12)      | 0.0199(11)      | 0.0176(10)      | 0.0039(9)       | 0.0078(9)       | 0.0015(8)       |
| C57  | 0.0234(12)      | 0.0263(12)      | 0.0206(11)      | 0.0030(9)       | 0.0085(9)       | 0.0004(9)       |
| C58  | 0.0248(13)      | 0.0336(13)      | 0.0220(12)      | 0.0023(10)      | 0.0039(10)      | -0.0020(10)     |
| C59  | 0.0317(14)      | 0.0373(14)      | 0.0182(11)      | 0.0041(11)      | 0.0064(10)      | -0.0036(10)     |
| C60  | 0.0289(13)      | 0.0271(12)      | 0.0219(12)      | 0.0063(10)      | 0.0107(10)      | 0.0013(9)       |
| C61  | 0.0193(12)      | 0.0221(11)      | 0.0228(11)      | 0.0051(9)       | 0.0072(9)       | 0.0014(9)       |
| C62  | 0.0339(15)      | 0.0358(14)      | 0.0235(12)      | 0.0061(11)      | 0.0127(11)      | 0.0010(10)      |
| C63  | 0.0421(16)      | 0.0380(15)      | 0.0260(13)      | 0.0015(12)      | 0.0146(12)      | 0.0065(11)      |
| C64  | 0.0447(17)      | 0.0501(17)      | 0.0241(13)      | 0.0035(14)      | 0.0177(12)      | -0.0006(12)     |
| C65  | 0.0358(16)      | 0.0456(16)      | 0.0316(14)      | 0.0091(13)      | 0.0169(12)      | -0.0019(12)     |
| C66  | 0.0287(14)      | 0.0500(17)      | 0.0255(13)      | -0.0014(12)     | 0.0036(11)      | -0.0057(12)     |
| C67  | 0.046(2)        | 0.070(3)        | 0.061(2)        | -0.0137(18)     | 0.0097(17)      | -0.027(2)       |

Table S13-3. Anisotropic displacement parameters (continued)

| atom | U <sub>11</sub> | U <sub>22</sub> | U <sub>33</sub> | U <sub>12</sub> | U <sub>13</sub> | U <sub>23</sub> |
|------|-----------------|-----------------|-----------------|-----------------|-----------------|-----------------|
| C68  | 0.0397(19)      | 0.087(3)        | 0.0431(19)      | -0.0004(18)     | -0.0027(15)     | 0.0103(18)      |
| C69  | 0.0337(17)      | 0.079(3)        | 0.0361(16)      | -0.0112(16)     | 0.0043(13)      | -0.0084(16)     |
| C70  | 0.0246(15)      | 0.0553(19)      | 0.0524(19)      | -0.0017(13)     | 0.0099(13)      | 0.0192(15)      |
| C71  | 0.0292(15)      | 0.0333(15)      | 0.0550(19)      | -0.0036(12)     | 0.0001(13)      | -0.0044(13)     |
| C72  | 0.0247(14)      | 0.0275(13)      | 0.0490(17)      | 0.0063(10)      | 0.0051(12)      | 0.0093(12)      |
| C73  | 0.0345(16)      | 0.0303(14)      | 0.0394(15)      | 0.0081(11)      | -0.0026(12)     | 0.0009(11)      |
| C74  | 0.0302(15)      | 0.0370(15)      | 0.0351(14)      | 0.0094(11)      | 0.0082(12)      | 0.0070(11)      |
| C75  | 0.0285(14)      | 0.0297(14)      | 0.0402(15)      | 0.0033(11)      | 0.0001(12)      | 0.0038(11)      |
| C76  | 0.0415(16)      | 0.0262(13)      | 0.0356(15)      | 0.0113(11)      | 0.0111(12)      | 0.0067(11)      |
| C77  | 0.064(2)        | 0.0384(17)      | 0.0425(17)      | 0.0138(15)      | 0.0198(16)      | 0.0043(13)      |
| C78  | 0.0331(16)      | 0.0318(15)      | 0.084(3)        | 0.0028(13)      | 0.0107(16)      | 0.0192(16)      |
| C79  | 0.0384(17)      | 0.0359(16)      | 0.0533(19)      | -0.0001(13)     | 0.0020(14)      | 0.0052(14)      |
| C80  | 0.0410(18)      | 0.061(2)        | 0.0437(18)      | 0.0103(15)      | 0.0168(14)      | 0.0050(15)      |
| C81  | 0.059(2)        | 0.0373(17)      | 0.055(2)        | 0.0087(15)      | -0.0092(17)     | -0.0061(15)     |

The general temperature factor expression:  $\exp(-2\pi^2(a^2U_{11}h^2 + b^2U_{22}k^2 + c^2U_{33}l^2 + 2a*b*U_{12}hk + 2a*c*U_{13}hl + 2b*c*U_{23}kl))$

Table S13-4. Bond lengths (Å)

| atom | atom | distance   | atom | atom | distance |
|------|------|------------|------|------|----------|
| Ti1  | O1   | 1.8221(16) | Ti1  | C16  | 2.122(2) |
| Ti1  | C17  | 2.133(3)   | Ti1  | C18  | 2.369(2) |
| Ti1  | C19  | 2.388(3)   | Ti1  | C20  | 2.406(3) |
| Ti1  | C21  | 2.411(2)   | Ti1  | C22  | 2.375(2) |
| Ti2  | O2   | 1.8230(17) | Ti2  | C43  | 2.122(3) |
| Ti2  | C44  | 2.136(3)   | Ti2  | C45  | 2.392(3) |
| Ti2  | C46  | 2.422(3)   | Ti2  | C47  | 2.410(3) |
| Ti2  | C48  | 2.375(3)   | Ti2  | C49  | 2.370(3) |
| Ti3  | O3   | 1.8149(17) | Ti3  | C70  | 2.129(4) |
| Ti3  | C71  | 2.128(3)   | Ti3  | C72  | 2.384(3) |
| Ti3  | C73  | 2.395(3)   | Ti3  | C74  | 2.403(3) |
| Ti3  | C75  | 2.403(3)   | Ti3  | C76  | 2.395(3) |
| O1   | C7   | 1.369(3)   | O2   | C34  | 1.367(3) |
| O3   | C61  | 1.370(3)   | N1   | C1   | 1.462(3) |
| N1   | C28  | 1.467(3)   | N1   | C55  | 1.456(3) |
| C1   | C2   | 1.515(3)   | C2   | C3   | 1.388(3) |
| C2   | C7   | 1.403(3)   | C3   | C4   | 1.393(3) |
| C4   | C5   | 1.393(3)   | C4   | C12  | 1.539(3) |
| C5   | C6   | 1.402(3)   | C6   | C7   | 1.411(3) |
| C6   | C8   | 1.532(3)   | C8   | C9   | 1.543(3) |
| C8   | C10  | 1.539(3)   | C8   | C11  | 1.535(4) |
| C12  | C13  | 1.532(4)   | C12  | C14  | 1.537(4) |
| C12  | C15  | 1.528(4)   | C18  | C19  | 1.419(4) |
| C18  | C22  | 1.423(3)   | C18  | C27  | 1.508(4) |
| C19  | C20  | 1.430(3)   | C19  | C26  | 1.504(4) |
| C20  | C21  | 1.414(3)   | C20  | C25  | 1.494(4) |
| C21  | C22  | 1.422(3)   | C21  | C24  | 1.501(3) |
| C22  | C23  | 1.499(4)   | C28  | C29  | 1.516(3) |
| C29  | C30  | 1.393(3)   | C29  | C34  | 1.398(3) |
| C30  | C31  | 1.391(3)   | C31  | C32  | 1.392(3) |
| C31  | C39  | 1.539(3)   | C32  | C33  | 1.403(3) |
| C33  | C34  | 1.416(3)   | C33  | C35  | 1.541(3) |
| C35  | C36  | 1.536(4)   | C35  | C37  | 1.530(4) |
| C35  | C38  | 1.540(4)   | C39  | C40  | 1.533(4) |
| C39  | C41  | 1.535(5)   | C39  | C42  | 1.516(5) |
| C45  | C46  | 1.416(4)   | C45  | C49  | 1.390(4) |
| C45  | C54  | 1.517(4)   | C46  | C47  | 1.423(4) |

Table S13-4. Bond lengths (Å) (continued)

| atom | atom | distance | atom | atom | distance |
|------|------|----------|------|------|----------|
| C46  | C53  | 1.506(5) | C47  | C48  | 1.408(5) |
| C47  | C52  | 1.506(5) | C48  | C49  | 1.411(4) |
| C48  | C51  | 1.509(4) | C49  | C50  | 1.518(4) |
| C55  | C56  | 1.518(3) | C56  | C57  | 1.382(3) |
| C56  | C61  | 1.403(4) | C57  | C58  | 1.397(3) |
| C58  | C59  | 1.398(4) | C58  | C66  | 1.539(4) |
| C59  | C60  | 1.395(4) | C60  | C61  | 1.416(3) |
| C60  | C62  | 1.540(4) | C62  | C63  | 1.542(4) |
| C62  | C64  | 1.539(4) | C62  | C65  | 1.545(4) |
| C66  | C67  | 1.538(5) | C66  | C68  | 1.538(5) |
| C66  | C69  | 1.516(5) | C72  | C73  | 1.410(5) |
| C72  | C76  | 1.413(4) | C72  | C78  | 1.517(5) |
| C73  | C74  | 1.411(4) | C73  | C81  | 1.501(5) |
| C74  | C75  | 1.408(4) | C74  | C80  | 1.515(5) |
| C75  | C76  | 1.433(4) | C75  | C79  | 1.504(4) |
| C76  | C77  | 1.508(4) |      |      |          |

Table S13-5. Bond lengths involving hydrogens (Å)

| atom | atom | distance | atom | atom | distance |
|------|------|----------|------|------|----------|
| C1   | H1A  | 0.990    | C1   | H1B  | 0.990    |
| C3   | H3   | 0.950    | C5   | H5   | 0.950    |
| C9   | H9A  | 0.980    | C9   | H9B  | 0.980    |
| C9   | H9C  | 0.980    | C10  | H10A | 0.980    |
| C10  | H10B | 0.980    | C10  | H10C | 0.980    |
| C11  | H11A | 0.980    | C11  | H11B | 0.980    |
| C11  | H11C | 0.980    | C13  | H13A | 0.980    |
| C13  | H13B | 0.980    | C13  | H13C | 0.980    |
| C14  | H14A | 0.980    | C14  | H14B | 0.980    |
| C14  | H14C | 0.980    | C15  | H15A | 0.980    |
| C15  | H15B | 0.980    | C15  | H15C | 0.980    |
| C16  | H16A | 0.980    | C16  | H16B | 0.980    |
| C16  | H16C | 0.980    | C17  | H17A | 0.980    |
| C17  | H17B | 0.980    | C17  | H17C | 0.980    |
| C23  | H23A | 0.980    | C23  | H23B | 0.980    |
| C23  | H23C | 0.980    | C24  | H24A | 0.980    |
| C24  | H24B | 0.980    | C24  | H24C | 0.980    |
| C25  | H25A | 0.980    | C25  | H25B | 0.980    |
| C25  | H25C | 0.980    | C26  | H26A | 0.98(3)  |
| C26  | H26B | 0.97(3)  | C26  | H26C | 0.92(5)  |
| C27  | H27A | 0.980    | C27  | H27B | 0.980    |
| C27  | H27C | 0.980    | C28  | H28A | 0.990    |
| C28  | H28B | 0.990    | C30  | H30  | 0.950    |
| C32  | H32  | 0.950    | C36  | H36A | 0.980    |
| C36  | H36B | 0.980    | C36  | H36C | 0.980    |
| C37  | H37A | 0.980    | C37  | H37B | 0.980    |
| C37  | H37C | 0.980    | C38  | H38A | 0.980    |
| C38  | H38B | 0.980    | C38  | H38C | 0.980    |
| C40  | H40A | 0.980    | C40  | H40B | 0.980    |
| C40  | H40C | 0.980    | C41  | H41A | 0.980    |
| C41  | H41B | 0.980    | C41  | H41C | 0.980    |
| C42  | H42A | 0.980    | C42  | H42B | 0.980    |
| C42  | H42C | 0.980    | C43  | H43A | 0.980    |
| C43  | H43B | 0.980    | C43  | H43C | 0.980    |
| C44  | H44A | 0.980    | C44  | H44B | 0.980    |
| C44  | H44C | 0.980    | C50  | H50A | 0.980    |
| C50  | H50B | 0.980    | C50  | H50C | 0.980    |

Table S13-5. Bond lengths involving hydrogens (Å) (continued)

| atom | atom | distance | atom | atom | distance |
|------|------|----------|------|------|----------|
| C51  | H51A | 0.980    | C51  | H51B | 0.980    |
| C51  | H51C | 0.980    | C52  | H52A | 0.980    |
| C52  | H52B | 0.980    | C52  | H52C | 0.980    |
| C53  | H53A | 0.980    | C53  | H53B | 0.980    |
| C53  | H53C | 0.980    | C54  | H54A | 0.980    |
| C54  | H54B | 0.980    | C54  | H54C | 0.980    |
| C55  | H55A | 0.990    | C55  | H55B | 0.990    |
| C57  | H57  | 0.950    | C59  | H59  | 0.950    |
| C63  | H63A | 0.980    | C63  | H63B | 0.980    |
| C63  | H63C | 0.980    | C64  | H64A | 0.980    |
| C64  | H64B | 0.980    | C64  | H64C | 0.980    |
| C65  | H65A | 0.980    | C65  | H65B | 0.980    |
| C65  | H65C | 0.980    | C67  | H67A | 0.980    |
| C67  | H67B | 0.980    | C67  | H67C | 0.980    |
| C68  | H68A | 0.980    | C68  | H68B | 0.980    |
| C68  | H68C | 0.980    | C69  | H69A | 0.980    |
| C69  | H69B | 0.980    | C69  | H69C | 0.980    |
| C70  | H70A | 0.980    | C70  | H70B | 0.980    |
| C70  | H70C | 0.980    | C71  | H71A | 0.980    |
| C71  | H71B | 0.980    | C71  | H71C | 0.980    |
| C77  | H77A | 0.980    | C77  | H77B | 0.980    |
| C77  | H77C | 0.980    | C78  | H78A | 0.980    |
| C78  | H78B | 0.980    | C78  | H78C | 0.980    |
| C79  | H79A | 0.980    | C79  | H79B | 0.980    |
| C79  | H79C | 0.980    | C80  | H80A | 0.980    |
| C80  | H80B | 0.980    | C80  | H80C | 0.980    |
| C81  | H81A | 0.980    | C81  | H81B | 0.980    |
| C81  | H81C | 0.980    |      |      |          |



Table S13-6. Bond angles (°)

| atom | atom | atom | angle      | atom | atom | atom | angle      |
|------|------|------|------------|------|------|------|------------|
| O1   | Ti1  | C16  | 104.74(9)  | O1   | Ti1  | C17  | 102.31(9)  |
| O1   | Ti1  | C18  | 94.68(8)   | O1   | Ti1  | C19  | 112.57(8)  |
| O1   | Ti1  | C20  | 147.29(8)  | O1   | Ti1  | C21  | 145.69(8)  |
| O1   | Ti1  | C22  | 111.16(8)  | C16  | Ti1  | C17  | 95.63(10)  |
| C16  | Ti1  | C18  | 128.17(10) | C16  | Ti1  | C19  | 93.95(10)  |
| C16  | Ti1  | C20  | 83.41(9)   | C16  | Ti1  | C21  | 108.47(10) |
| C16  | Ti1  | C22  | 140.51(10) | C17  | Ti1  | C18  | 126.75(9)  |
| C17  | Ti1  | C19  | 139.98(9)  | C17  | Ti1  | C20  | 108.42(10) |
| C17  | Ti1  | C21  | 82.97(9)   | C17  | Ti1  | C22  | 92.39(9)   |
| C18  | Ti1  | C19  | 34.70(9)   | C18  | Ti1  | C20  | 57.83(8)   |
| C18  | Ti1  | C21  | 57.64(8)   | C18  | Ti1  | C22  | 34.92(8)   |
| C19  | Ti1  | C20  | 34.71(8)   | C19  | Ti1  | C21  | 57.17(8)   |
| C19  | Ti1  | C22  | 57.57(9)   | C20  | Ti1  | C21  | 34.14(8)   |
| C20  | Ti1  | C22  | 57.45(9)   | C21  | Ti1  | C22  | 34.56(8)   |
| O2   | Ti2  | C43  | 100.86(10) | O2   | Ti2  | C44  | 105.05(10) |
| O2   | Ti2  | C45  | 104.75(9)  | O2   | Ti2  | C46  | 137.04(9)  |
| O2   | Ti2  | C47  | 153.33(10) | O2   | Ti2  | C48  | 121.00(10) |
| O2   | Ti2  | C49  | 96.61(9)   | C43  | Ti2  | C44  | 96.79(12)  |
| C43  | Ti2  | C45  | 141.43(11) | C43  | Ti2  | C46  | 120.44(11) |
| C43  | Ti2  | C47  | 88.46(11)  | C43  | Ti2  | C48  | 85.36(11)  |
| C43  | Ti2  | C49  | 115.22(11) | C44  | Ti2  | C45  | 103.72(11) |
| C44  | Ti2  | C46  | 82.67(12)  | C44  | Ti2  | C47  | 98.49(11)  |
| C44  | Ti2  | C48  | 132.69(11) | C44  | Ti2  | C49  | 137.00(11) |
| C45  | Ti2  | C46  | 34.20(11)  | C45  | Ti2  | C47  | 56.69(10)  |
| C45  | Ti2  | C48  | 56.75(10)  | C45  | Ti2  | C49  | 33.93(10)  |
| C46  | Ti2  | C47  | 34.26(10)  | C46  | Ti2  | C48  | 56.98(11)  |
| C46  | Ti2  | C49  | 56.96(11)  | C47  | Ti2  | C48  | 34.21(11)  |
| C47  | Ti2  | C49  | 57.06(10)  | C48  | Ti2  | C49  | 34.60(9)   |
| O3   | Ti3  | C70  | 101.79(10) | O3   | Ti3  | C71  | 103.06(10) |
| O3   | Ti3  | C72  | 101.83(9)  | O3   | Ti3  | C73  | 102.08(9)  |
| O3   | Ti3  | C74  | 131.03(9)  | O3   | Ti3  | C75  | 157.79(9)  |
| O3   | Ti3  | C76  | 130.11(9)  | C70  | Ti3  | C71  | 95.20(13)  |
| C70  | Ti3  | C72  | 139.14(12) | C70  | Ti3  | C73  | 107.76(12) |
| C70  | Ti3  | C74  | 82.66(11)  | C70  | Ti3  | C75  | 92.74(11)  |
| C70  | Ti3  | C76  | 127.04(11) | C71  | Ti3  | C72  | 111.20(12) |
| C71  | Ti3  | C73  | 141.38(11) | C71  | Ti3  | C74  | 125.31(10) |
| C71  | Ti3  | C75  | 92.12(11)  | C71  | Ti3  | C76  | 83.99(11)  |

Table S13-6. Bond angles ( $^{\circ}$ ) (continued)

| atom | atom | atom | angle      | atom | atom | atom | angle      |
|------|------|------|------------|------|------|------|------------|
| C72  | Ti3  | C73  | 34.32(11)  | C72  | Ti3  | C74  | 56.76(10)  |
| C72  | Ti3  | C75  | 57.02(9)   | C72  | Ti3  | C76  | 34.39(9)   |
| C73  | Ti3  | C74  | 34.22(10)  | C73  | Ti3  | C75  | 57.02(9)   |
| C73  | Ti3  | C76  | 57.39(10)  | C74  | Ti3  | C75  | 34.06(10)  |
| C74  | Ti3  | C76  | 57.20(10)  | C75  | Ti3  | C76  | 34.75(10)  |
| Ti1  | O1   | C7   | 165.63(15) | Ti2  | O2   | C34  | 165.28(15) |
| Ti3  | O3   | C61  | 166.02(16) | C1   | N1   | C28  | 110.77(18) |
| C1   | N1   | C55  | 111.77(18) | C28  | N1   | C55  | 110.85(17) |
| N1   | C1   | C2   | 111.82(19) | C1   | C2   | C3   | 120.2(2)   |
| C1   | C2   | C7   | 120.0(2)   | C3   | C2   | C7   | 119.8(2)   |
| C2   | C3   | C4   | 121.7(2)   | C3   | C4   | C5   | 117.4(2)   |
| C3   | C4   | C12  | 119.0(2)   | C5   | C4   | C12  | 123.6(2)   |
| C4   | C5   | C6   | 123.5(2)   | C5   | C6   | C7   | 117.1(2)   |
| C5   | C6   | C8   | 120.8(2)   | C7   | C6   | C8   | 122.02(19) |
| O1   | C7   | C2   | 117.2(2)   | O1   | C7   | C6   | 122.30(19) |
| C2   | C7   | C6   | 120.5(2)   | C6   | C8   | C9   | 108.86(18) |
| C6   | C8   | C10  | 110.1(2)   | C6   | C8   | C11  | 112.28(19) |
| C9   | C8   | C10  | 111.26(19) | C9   | C8   | C11  | 107.7(2)   |
| C10  | C8   | C11  | 106.62(19) | C4   | C12  | C13  | 109.33(19) |
| C4   | C12  | C14  | 108.7(2)   | C4   | C12  | C15  | 112.42(19) |
| C13  | C12  | C14  | 109.0(2)   | C13  | C12  | C15  | 108.9(2)   |
| C14  | C12  | C15  | 108.3(2)   | Ti1  | C18  | C19  | 73.39(14)  |
| Ti1  | C18  | C22  | 72.79(14)  | Ti1  | C18  | C27  | 120.39(17) |
| C19  | C18  | C22  | 107.6(2)   | C19  | C18  | C27  | 126.8(2)   |
| C22  | C18  | C27  | 125.6(2)   | Ti1  | C19  | C18  | 71.91(15)  |
| Ti1  | C19  | C20  | 73.34(15)  | Ti1  | C19  | C26  | 124.68(18) |
| C18  | C19  | C20  | 108.3(2)   | C18  | C19  | C26  | 127.6(2)   |
| C20  | C19  | C26  | 123.9(2)   | Ti1  | C20  | C19  | 71.95(15)  |
| Ti1  | C20  | C21  | 73.12(15)  | Ti1  | C20  | C25  | 125.22(18) |
| C19  | C20  | C21  | 107.7(2)   | C19  | C20  | C25  | 125.7(2)   |
| C21  | C20  | C25  | 126.4(2)   | Ti1  | C21  | C20  | 72.74(14)  |
| Ti1  | C21  | C22  | 71.35(14)  | Ti1  | C21  | C24  | 125.99(18) |
| C20  | C21  | C22  | 108.2(2)   | C20  | C21  | C24  | 125.7(2)   |
| C22  | C21  | C24  | 125.8(2)   | Ti1  | C22  | C18  | 72.29(13)  |
| Ti1  | C22  | C21  | 74.10(13)  | Ti1  | C22  | C23  | 122.47(18) |
| C18  | C22  | C21  | 108.2(2)   | C18  | C22  | C23  | 127.1(2)   |
| C21  | C22  | C23  | 124.7(2)   | N1   | C28  | C29  | 112.17(18) |

Table S13-6. Bond angles ( $^{\circ}$ ) (continued)

| atom | atom | atom | angle      | atom | atom | atom | angle      |
|------|------|------|------------|------|------|------|------------|
| C28  | C29  | C30  | 120.56(19) | C28  | C29  | C34  | 119.38(19) |
| C30  | C29  | C34  | 120.1(2)   | C29  | C30  | C31  | 121.3(2)   |
| C30  | C31  | C32  | 117.4(2)   | C30  | C31  | C39  | 121.6(2)   |
| C32  | C31  | C39  | 121.0(2)   | C31  | C32  | C33  | 123.8(2)   |
| C32  | C33  | C34  | 116.7(2)   | C32  | C33  | C35  | 121.2(2)   |
| C34  | C33  | C35  | 122.1(2)   | O2   | C34  | C29  | 117.11(19) |
| O2   | C34  | C33  | 122.47(19) | C29  | C34  | C33  | 120.4(2)   |
| C33  | C35  | C36  | 108.0(2)   | C33  | C35  | C37  | 112.0(2)   |
| C33  | C35  | C38  | 110.9(2)   | C36  | C35  | C37  | 107.7(2)   |
| C36  | C35  | C38  | 110.5(2)   | C37  | C35  | C38  | 107.6(2)   |
| C31  | C39  | C40  | 112.6(2)   | C31  | C39  | C41  | 109.5(2)   |
| C31  | C39  | C42  | 109.9(2)   | C40  | C39  | C41  | 107.0(3)   |
| C40  | C39  | C42  | 108.5(2)   | C41  | C39  | C42  | 109.3(3)   |
| Ti2  | C45  | C46  | 74.05(18)  | Ti2  | C45  | C49  | 72.19(17)  |
| Ti2  | C45  | C54  | 126.4(2)   | C46  | C45  | C49  | 109.1(2)   |
| C46  | C45  | C54  | 125.8(3)   | C49  | C45  | C54  | 124.6(3)   |
| Ti2  | C46  | C45  | 71.75(18)  | Ti2  | C46  | C47  | 72.44(18)  |
| Ti2  | C46  | C53  | 127.1(3)   | C45  | C46  | C47  | 106.9(3)   |
| C45  | C46  | C53  | 126.4(3)   | C47  | C46  | C53  | 126.2(3)   |
| Ti2  | C47  | C46  | 73.30(18)  | Ti2  | C47  | C48  | 71.51(18)  |
| Ti2  | C47  | C52  | 123.7(2)   | C46  | C47  | C48  | 107.9(3)   |
| C46  | C47  | C52  | 124.6(3)   | C48  | C47  | C52  | 127.4(3)   |
| Ti2  | C48  | C47  | 74.28(18)  | Ti2  | C48  | C49  | 72.53(17)  |
| Ti2  | C48  | C51  | 123.1(2)   | C47  | C48  | C49  | 108.2(2)   |
| C47  | C48  | C51  | 125.0(3)   | C49  | C48  | C51  | 126.6(3)   |
| Ti2  | C49  | C45  | 73.88(18)  | Ti2  | C49  | C48  | 72.87(17)  |
| Ti2  | C49  | C50  | 122.4(2)   | C45  | C49  | C48  | 108.0(3)   |
| C45  | C49  | C50  | 124.3(2)   | C48  | C49  | C50  | 127.6(3)   |
| N1   | C55  | C56  | 112.96(18) | C55  | C56  | C57  | 121.6(2)   |
| C55  | C56  | C61  | 118.4(2)   | C57  | C56  | C61  | 119.9(2)   |
| C56  | C57  | C58  | 121.6(2)   | C57  | C58  | C59  | 117.0(2)   |
| C57  | C58  | C66  | 122.4(2)   | C59  | C58  | C66  | 120.5(2)   |
| C58  | C59  | C60  | 124.0(2)   | C59  | C60  | C61  | 116.6(2)   |
| C59  | C60  | C62  | 121.2(2)   | C61  | C60  | C62  | 122.1(2)   |
| O3   | C61  | C56  | 117.6(2)   | O3   | C61  | C60  | 121.8(2)   |
| C56  | C61  | C60  | 120.6(2)   | C60  | C62  | C63  | 108.8(2)   |
| C60  | C62  | C64  | 112.3(2)   | C60  | C62  | C65  | 110.5(2)   |

Table S13-6. Bond angles ( $^{\circ}$ ) (continued)

| atom | atom | atom | angle     | atom | atom | atom | angle      |
|------|------|------|-----------|------|------|------|------------|
| C63  | C62  | C64  | 106.8(2)  | C63  | C62  | C65  | 110.4(2)   |
| C64  | C62  | C65  | 107.9(2)  | C58  | C66  | C67  | 108.6(2)   |
| C58  | C66  | C68  | 109.5(3)  | C58  | C66  | C69  | 112.9(2)   |
| C67  | C66  | C68  | 108.9(3)  | C67  | C66  | C69  | 108.6(3)   |
| C68  | C66  | C69  | 108.3(3)  | Ti3  | C72  | C73  | 73.27(17)  |
| Ti3  | C72  | C76  | 73.24(16) | Ti3  | C72  | C78  | 126.18(19) |
| C73  | C72  | C76  | 109.1(3)  | C73  | C72  | C78  | 124.0(3)   |
| C76  | C72  | C78  | 126.4(3)  | Ti3  | C73  | C72  | 72.41(16)  |
| Ti3  | C73  | C74  | 73.20(16) | Ti3  | C73  | C81  | 123.9(2)   |
| C72  | C73  | C74  | 107.5(2)  | C72  | C73  | C81  | 125.3(3)   |
| C74  | C73  | C81  | 127.0(3)  | Ti3  | C74  | C73  | 72.58(16)  |
| Ti3  | C74  | C75  | 72.98(16) | Ti3  | C74  | C80  | 125.5(2)   |
| C73  | C74  | C75  | 108.6(3)  | C73  | C74  | C80  | 124.9(3)   |
| C75  | C74  | C80  | 126.2(3)  | Ti3  | C75  | C74  | 72.95(15)  |
| Ti3  | C75  | C76  | 72.31(15) | Ti3  | C75  | C79  | 121.20(19) |
| C74  | C75  | C76  | 107.9(2)  | C74  | C75  | C79  | 125.4(3)   |
| C76  | C75  | C79  | 126.6(3)  | Ti3  | C76  | C72  | 72.37(16)  |
| Ti3  | C76  | C75  | 72.94(16) | Ti3  | C76  | C77  | 123.6(2)   |
| C72  | C76  | C75  | 106.8(3)  | C72  | C76  | C77  | 126.7(3)   |
| C75  | C76  | C77  | 126.2(3)  |      |      |      |            |

Table S13-7. Bond angles involving hydrogens ( $^{\circ}$ )

| atom | atom | atom | angle | atom | atom | atom | angle |
|------|------|------|-------|------|------|------|-------|
| N1   | C1   | H1A  | 109.2 | N1   | C1   | H1B  | 109.2 |
| C2   | C1   | H1A  | 109.3 | C2   | C1   | H1B  | 109.3 |
| H1A  | C1   | H1B  | 107.9 | C2   | C3   | H3   | 119.2 |
| C4   | C3   | H3   | 119.2 | C4   | C5   | H5   | 118.3 |
| C6   | C5   | H5   | 118.2 | C8   | C9   | H9A  | 109.5 |
| C8   | C9   | H9B  | 109.5 | C8   | C9   | H9C  | 109.5 |
| H9A  | C9   | H9B  | 109.5 | H9A  | C9   | H9C  | 109.5 |
| H9B  | C9   | H9C  | 109.5 | C8   | C10  | H10A | 109.5 |
| C8   | C10  | H10B | 109.5 | C8   | C10  | H10C | 109.5 |
| H10A | C10  | H10B | 109.5 | H10A | C10  | H10C | 109.5 |
| H10B | C10  | H10C | 109.5 | C8   | C11  | H11A | 109.5 |
| C8   | C11  | H11B | 109.5 | C8   | C11  | H11C | 109.5 |
| H11A | C11  | H11B | 109.5 | H11A | C11  | H11C | 109.5 |
| H11B | C11  | H11C | 109.5 | C12  | C13  | H13A | 109.5 |
| C12  | C13  | H13B | 109.5 | C12  | C13  | H13C | 109.5 |
| H13A | C13  | H13B | 109.5 | H13A | C13  | H13C | 109.5 |
| H13B | C13  | H13C | 109.5 | C12  | C14  | H14A | 109.5 |
| C12  | C14  | H14B | 109.5 | C12  | C14  | H14C | 109.5 |
| H14A | C14  | H14B | 109.5 | H14A | C14  | H14C | 109.5 |
| H14B | C14  | H14C | 109.5 | C12  | C15  | H15A | 109.5 |
| C12  | C15  | H15B | 109.5 | C12  | C15  | H15C | 109.5 |
| H15A | C15  | H15B | 109.5 | H15A | C15  | H15C | 109.5 |
| H15B | C15  | H15C | 109.5 | Ti1  | C16  | H16A | 109.5 |
| Ti1  | C16  | H16B | 109.5 | Ti1  | C16  | H16C | 109.5 |
| H16A | C16  | H16B | 109.5 | H16A | C16  | H16C | 109.5 |
| H16B | C16  | H16C | 109.5 | Ti1  | C17  | H17A | 109.5 |
| Ti1  | C17  | H17B | 109.5 | Ti1  | C17  | H17C | 109.5 |
| H17A | C17  | H17B | 109.5 | H17A | C17  | H17C | 109.5 |
| H17B | C17  | H17C | 109.5 | C22  | C23  | H23A | 109.5 |
| C22  | C23  | H23B | 109.5 | C22  | C23  | H23C | 109.5 |
| H23A | C23  | H23B | 109.5 | H23A | C23  | H23C | 109.5 |
| H23B | C23  | H23C | 109.5 | C21  | C24  | H24A | 109.5 |
| C21  | C24  | H24B | 109.5 | C21  | C24  | H24C | 109.5 |
| H24A | C24  | H24B | 109.5 | H24A | C24  | H24C | 109.5 |
| H24B | C24  | H24C | 109.5 | C20  | C25  | H25A | 109.5 |
| C20  | C25  | H25B | 109.5 | C20  | C25  | H25C | 109.5 |
| H25A | C25  | H25B | 109.5 | H25A | C25  | H25C | 109.5 |

Table S13-7. Bond angles involving hydrogens ( $^{\circ}$ ) (continued)

| atom | atom | atom | angle     | atom | atom | atom | angle     |
|------|------|------|-----------|------|------|------|-----------|
| H25B | C25  | H25C | 109.5     | C19  | C26  | H26A | 112.1(19) |
| C19  | C26  | H26B | 109.4(19) | C19  | C26  | H26C | 112(3)    |
| H26A | C26  | H26B | 109(3)    | H26A | C26  | H26C | 108(3)    |
| H26B | C26  | H26C | 106(3)    | C18  | C27  | H27A | 109.5     |
| C18  | C27  | H27B | 109.5     | C18  | C27  | H27C | 109.5     |
| H27A | C27  | H27B | 109.5     | H27A | C27  | H27C | 109.5     |
| H27B | C27  | H27C | 109.5     | N1   | C28  | H28A | 109.2     |
| N1   | C28  | H28B | 109.2     | C29  | C28  | H28A | 109.2     |
| C29  | C28  | H28B | 109.2     | H28A | C28  | H28B | 107.9     |
| C29  | C30  | H30  | 119.3     | C31  | C30  | H30  | 119.3     |
| C31  | C32  | H32  | 118.1     | C33  | C32  | H32  | 118.1     |
| C35  | C36  | H36A | 109.5     | C35  | C36  | H36B | 109.5     |
| C35  | C36  | H36C | 109.5     | H36A | C36  | H36B | 109.5     |
| H36A | C36  | H36C | 109.5     | H36B | C36  | H36C | 109.5     |
| C35  | C37  | H37A | 109.5     | C35  | C37  | H37B | 109.5     |
| C35  | C37  | H37C | 109.5     | H37A | C37  | H37B | 109.5     |
| H37A | C37  | H37C | 109.5     | H37B | C37  | H37C | 109.5     |
| C35  | C38  | H38A | 109.5     | C35  | C38  | H38B | 109.5     |
| C35  | C38  | H38C | 109.5     | H38A | C38  | H38B | 109.5     |
| H38A | C38  | H38C | 109.5     | H38B | C38  | H38C | 109.5     |
| C39  | C40  | H40A | 109.5     | C39  | C40  | H40B | 109.5     |
| C39  | C40  | H40C | 109.5     | H40A | C40  | H40B | 109.5     |
| H40A | C40  | H40C | 109.5     | H40B | C40  | H40C | 109.5     |
| C39  | C41  | H41A | 109.5     | C39  | C41  | H41B | 109.5     |
| C39  | C41  | H41C | 109.5     | H41A | C41  | H41B | 109.5     |
| H41A | C41  | H41C | 109.5     | H41B | C41  | H41C | 109.5     |
| C39  | C42  | H42A | 109.5     | C39  | C42  | H42B | 109.5     |
| C39  | C42  | H42C | 109.5     | H42A | C42  | H42B | 109.5     |
| H42A | C42  | H42C | 109.5     | H42B | C42  | H42C | 109.5     |
| Ti2  | C43  | H43A | 109.5     | Ti2  | C43  | H43B | 109.5     |
| Ti2  | C43  | H43C | 109.5     | H43A | C43  | H43B | 109.5     |
| H43A | C43  | H43C | 109.5     | H43B | C43  | H43C | 109.5     |
| Ti2  | C44  | H44A | 109.5     | Ti2  | C44  | H44B | 109.5     |
| Ti2  | C44  | H44C | 109.5     | H44A | C44  | H44B | 109.5     |
| H44A | C44  | H44C | 109.5     | H44B | C44  | H44C | 109.5     |
| C49  | C50  | H50A | 109.5     | C49  | C50  | H50B | 109.5     |
| C49  | C50  | H50C | 109.5     | H50A | C50  | H50B | 109.5     |

Table S13-7. Bond angles involving hydrogens ( $^{\circ}$ ) (continued)

| atom | atom | atom | angle | atom | atom | atom | angle |
|------|------|------|-------|------|------|------|-------|
| H50A | C50  | H50C | 109.5 | H50B | C50  | H50C | 109.5 |
| C48  | C51  | H51A | 109.5 | C48  | C51  | H51B | 109.5 |
| C48  | C51  | H51C | 109.5 | H51A | C51  | H51B | 109.5 |
| H51A | C51  | H51C | 109.5 | H51B | C51  | H51C | 109.5 |
| C47  | C52  | H52A | 109.5 | C47  | C52  | H52B | 109.5 |
| C47  | C52  | H52C | 109.5 | H52A | C52  | H52B | 109.5 |
| H52A | C52  | H52C | 109.5 | H52B | C52  | H52C | 109.5 |
| C46  | C53  | H53A | 109.5 | C46  | C53  | H53B | 109.5 |
| C46  | C53  | H53C | 109.5 | H53A | C53  | H53B | 109.5 |
| H53A | C53  | H53C | 109.5 | H53B | C53  | H53C | 109.5 |
| C45  | C54  | H54A | 109.5 | C45  | C54  | H54B | 109.5 |
| C45  | C54  | H54C | 109.5 | H54A | C54  | H54B | 109.5 |
| H54A | C54  | H54C | 109.5 | H54B | C54  | H54C | 109.5 |
| N1   | C55  | H55A | 109.0 | N1   | C55  | H55B | 109.0 |
| C56  | C55  | H55A | 109.0 | C56  | C55  | H55B | 109.0 |
| H55A | C55  | H55B | 107.8 | C56  | C57  | H57  | 119.2 |
| C58  | C57  | H57  | 119.2 | C58  | C59  | H59  | 118.0 |
| C60  | C59  | H59  | 118.0 | C62  | C63  | H63A | 109.5 |
| C62  | C63  | H63B | 109.5 | C62  | C63  | H63C | 109.5 |
| H63A | C63  | H63B | 109.5 | H63A | C63  | H63C | 109.5 |
| H63B | C63  | H63C | 109.5 | C62  | C64  | H64A | 109.5 |
| C62  | C64  | H64B | 109.5 | C62  | C64  | H64C | 109.5 |
| H64A | C64  | H64B | 109.5 | H64A | C64  | H64C | 109.5 |
| H64B | C64  | H64C | 109.5 | C62  | C65  | H65A | 109.5 |
| C62  | C65  | H65B | 109.5 | C62  | C65  | H65C | 109.5 |
| H65A | C65  | H65B | 109.5 | H65A | C65  | H65C | 109.5 |
| H65B | C65  | H65C | 109.5 | C66  | C67  | H67A | 109.5 |
| C66  | C67  | H67B | 109.5 | C66  | C67  | H67C | 109.5 |
| H67A | C67  | H67B | 109.5 | H67A | C67  | H67C | 109.5 |
| H67B | C67  | H67C | 109.5 | C66  | C68  | H68A | 109.5 |
| C66  | C68  | H68B | 109.5 | C66  | C68  | H68C | 109.5 |
| H68A | C68  | H68B | 109.5 | H68A | C68  | H68C | 109.5 |
| H68B | C68  | H68C | 109.5 | C66  | C69  | H69A | 109.5 |
| C66  | C69  | H69B | 109.5 | C66  | C69  | H69C | 109.5 |
| H69A | C69  | H69B | 109.5 | H69A | C69  | H69C | 109.5 |
| H69B | C69  | H69C | 109.5 | Ti3  | C70  | H70A | 109.5 |
| Ti3  | C70  | H70B | 109.5 | Ti3  | C70  | H70C | 109.5 |

Table S13-7. Bond angles involving hydrogens ( $^{\circ}$ ) (continued)

| atom | atom | atom | angle | atom | atom | atom | angle |
|------|------|------|-------|------|------|------|-------|
| H70A | C70  | H70B | 109.5 | H70A | C70  | H70C | 109.5 |
| H70B | C70  | H70C | 109.5 | Ti3  | C71  | H71A | 109.5 |
| Ti3  | C71  | H71B | 109.5 | Ti3  | C71  | H71C | 109.5 |
| H71A | C71  | H71B | 109.5 | H71A | C71  | H71C | 109.5 |
| H71B | C71  | H71C | 109.5 | C76  | C77  | H77A | 109.5 |
| C76  | C77  | H77B | 109.5 | C76  | C77  | H77C | 109.5 |
| H77A | C77  | H77B | 109.5 | H77A | C77  | H77C | 109.5 |
| H77B | C77  | H77C | 109.5 | C72  | C78  | H78A | 109.5 |
| C72  | C78  | H78B | 109.5 | C72  | C78  | H78C | 109.5 |
| H78A | C78  | H78B | 109.5 | H78A | C78  | H78C | 109.5 |
| H78B | C78  | H78C | 109.4 | C75  | C79  | H79A | 109.5 |
| C75  | C79  | H79B | 109.5 | C75  | C79  | H79C | 109.5 |
| H79A | C79  | H79B | 109.5 | H79A | C79  | H79C | 109.5 |
| H79B | C79  | H79C | 109.5 | C74  | C80  | H80A | 109.5 |
| C74  | C80  | H80B | 109.5 | C74  | C80  | H80C | 109.5 |
| H80A | C80  | H80B | 109.5 | H80A | C80  | H80C | 109.5 |
| H80B | C80  | H80C | 109.5 | C73  | C81  | H81A | 109.5 |
| C73  | C81  | H81B | 109.5 | C73  | C81  | H81C | 109.5 |
| H81A | C81  | H81B | 109.5 | H81A | C81  | H81C | 109.5 |
| H81B | C81  | H81C | 109.5 |      |      |      |       |



Table S13-8. Torsion Angles(°)

(Those having bond angles &gt; 160 or &lt; 20 degrees are excluded.)

| atom1 | atom2 | atom3 | atom4 | angle       | atom1 | atom2 | atom3 | atom4 | angle       |
|-------|-------|-------|-------|-------------|-------|-------|-------|-------|-------------|
| O1    | Ti1   | C18   | C19   | 123.94(10)  | O1    | Ti1   | C18   | C22   | -121.03(10) |
| O1    | Ti1   | C18   | C27   | 0.58(16)    | O1    | Ti1   | C19   | C18   | -63.56(11)  |
| O1    | Ti1   | C19   | C20   | -179.80(8)  | O1    | Ti1   | C19   | C26   | 60.14(18)   |
| O1    | Ti1   | C20   | C19   | 0.34(19)    | O1    | Ti1   | C20   | C21   | -115.30(13) |
| O1    | Ti1   | C20   | C25   | 121.73(16)  | O1    | Ti1   | C21   | C20   | 119.91(13)  |
| O1    | Ti1   | C21   | C22   | 3.11(19)    | O1    | Ti1   | C21   | C24   | -118.09(16) |
| O1    | Ti1   | C22   | C18   | 66.32(12)   | O1    | Ti1   | C22   | C21   | -178.12(9)  |
| O1    | Ti1   | C22   | C23   | -56.82(17)  | C16   | Ti1   | C18   | C19   | 11.05(16)   |
| C16   | Ti1   | C18   | C22   | 126.08(12)  | C16   | Ti1   | C18   | C27   | -112.31(17) |
| C16   | Ti1   | C19   | C18   | -171.31(11) | C16   | Ti1   | C19   | C20   | 72.45(11)   |
| C16   | Ti1   | C19   | C26   | -47.61(17)  | C16   | Ti1   | C20   | C19   | -106.76(11) |
| C16   | Ti1   | C20   | C21   | 137.61(11)  | C16   | Ti1   | C20   | C25   | 14.64(16)   |
| C16   | Ti1   | C21   | C20   | -44.92(12)  | C16   | Ti1   | C21   | C22   | -161.72(10) |
| C16   | Ti1   | C21   | C24   | 77.08(19)   | C16   | Ti1   | C22   | C18   | -87.67(16)  |
| C16   | Ti1   | C22   | C21   | 27.89(19)   | C16   | Ti1   | C22   | C23   | 149.19(15)  |
| C17   | Ti1   | C18   | C19   | -126.90(12) | C17   | Ti1   | C18   | C22   | -11.87(17)  |
| C17   | Ti1   | C18   | C27   | 109.74(16)  | C17   | Ti1   | C19   | C18   | 85.10(16)   |
| C17   | Ti1   | C19   | C20   | -31.14(18)  | C17   | Ti1   | C19   | C26   | -151.19(15) |
| C17   | Ti1   | C20   | C19   | 159.48(10)  | C17   | Ti1   | C20   | C21   | 43.85(12)   |
| C17   | Ti1   | C20   | C25   | -79.12(17)  | C17   | Ti1   | C21   | C20   | -138.53(11) |
| C17   | Ti1   | C21   | C22   | 104.67(11)  | C17   | Ti1   | C21   | C24   | -16.53(17)  |
| C17   | Ti1   | C22   | C18   | 170.50(12)  | C17   | Ti1   | C22   | C21   | -73.94(12)  |
| C17   | Ti1   | C22   | C23   | 47.36(17)   | C18   | Ti1   | C19   | C18   | 0.00(10)    |
| C18   | Ti1   | C19   | C20   | -116.24(17) | C18   | Ti1   | C19   | C26   | 123.7(2)    |
| C19   | Ti1   | C18   | C19   | 0.00(10)    | C19   | Ti1   | C18   | C22   | 115.03(18)  |
| C19   | Ti1   | C18   | C27   | -123.4(2)   | C18   | Ti1   | C20   | C19   | 37.10(9)    |
| C18   | Ti1   | C20   | C21   | -78.53(11)  | C18   | Ti1   | C20   | C25   | 158.5(2)    |
| C20   | Ti1   | C18   | C19   | -37.12(9)   | C20   | Ti1   | C18   | C22   | 77.91(11)   |
| C20   | Ti1   | C18   | C27   | -160.48(19) | C18   | Ti1   | C21   | C20   | 79.11(11)   |
| C18   | Ti1   | C21   | C22   | -37.68(9)   | C18   | Ti1   | C21   | C24   | -158.9(2)   |
| C21   | Ti1   | C18   | C19   | -77.74(11)  | C21   | Ti1   | C18   | C22   | 37.28(10)   |
| C21   | Ti1   | C18   | C27   | 158.9(2)    | C18   | Ti1   | C22   | C18   | 0.00(11)    |
| C18   | Ti1   | C22   | C21   | 115.56(19)  | C18   | Ti1   | C22   | C23   | -123.1(2)   |
| C22   | Ti1   | C18   | C19   | -115.03(19) | C22   | Ti1   | C18   | C22   | -0.00(11)   |
| C22   | Ti1   | C18   | C27   | 121.6(2)    | C19   | Ti1   | C20   | C19   | -0.00(10)   |
| C19   | Ti1   | C20   | C21   | -115.63(17) | C19   | Ti1   | C20   | C25   | 121.4(2)    |
| C20   | Ti1   | C19   | C18   | 116.24(17)  | C20   | Ti1   | C19   | C20   | -0.00(10)   |

Table S13-8. Torsion angles ( $^{\circ}$ ) (continued)

| atom1 | atom2 | atom3 | atom4 | angle       | atom1 | atom2 | atom3 | atom4 | angle       |
|-------|-------|-------|-------|-------------|-------|-------|-------|-------|-------------|
| C20   | Ti1   | C19   | C26   | -120.1(2)   | C19   | Ti1   | C21   | C20   | 37.66(9)    |
| C19   | Ti1   | C21   | C22   | -79.14(11)  | C19   | Ti1   | C21   | C24   | 159.7(2)    |
| C21   | Ti1   | C19   | C18   | 79.22(11)   | C21   | Ti1   | C19   | C20   | -37.02(9)   |
| C21   | Ti1   | C19   | C26   | -157.1(2)   | C19   | Ti1   | C22   | C18   | -37.67(10)  |
| C19   | Ti1   | C22   | C21   | 77.89(12)   | C19   | Ti1   | C22   | C23   | -160.81(19) |
| C22   | Ti1   | C19   | C18   | 37.92(9)    | C22   | Ti1   | C19   | C20   | -78.32(11)  |
| C22   | Ti1   | C19   | C26   | 161.6(2)    | C20   | Ti1   | C21   | C20   | 0.00(10)    |
| C20   | Ti1   | C21   | C22   | -116.80(17) | C20   | Ti1   | C21   | C24   | 122.0(2)    |
| C21   | Ti1   | C20   | C19   | 115.63(17)  | C21   | Ti1   | C20   | C21   | -0.00(10)   |
| C21   | Ti1   | C20   | C25   | -123.0(2)   | C20   | Ti1   | C22   | C18   | -79.10(12)  |
| C20   | Ti1   | C22   | C21   | 36.47(9)    | C20   | Ti1   | C22   | C23   | 157.76(19)  |
| C22   | Ti1   | C20   | C19   | 78.71(11)   | C22   | Ti1   | C20   | C21   | -36.92(9)   |
| C22   | Ti1   | C20   | C25   | -159.9(2)   | C21   | Ti1   | C22   | C18   | -115.56(19) |
| C21   | Ti1   | C22   | C21   | 0.00(10)    | C21   | Ti1   | C22   | C23   | 121.3(2)    |
| C22   | Ti1   | C21   | C20   | 116.80(17)  | C22   | Ti1   | C21   | C22   | 0.00(11)    |
| C22   | Ti1   | C21   | C24   | -121.2(2)   | O2    | Ti2   | C45   | C46   | 163.56(10)  |
| O2    | Ti2   | C45   | C49   | -79.74(12)  | O2    | Ti2   | C45   | C54   | 40.5(2)     |
| O2    | Ti2   | C46   | C45   | -23.7(2)    | O2    | Ti2   | C46   | C47   | -138.81(11) |
| O2    | Ti2   | C46   | C53   | 98.6(2)     | O2    | Ti2   | C47   | C46   | 88.5(2)     |
| O2    | Ti2   | C47   | C48   | -27.5(3)    | O2    | Ti2   | C47   | C52   | -150.62(15) |
| O2    | Ti2   | C48   | C47   | 166.02(8)   | O2    | Ti2   | C48   | C49   | 50.62(15)   |
| O2    | Ti2   | C48   | C51   | -72.1(2)    | O2    | Ti2   | C49   | C45   | 106.68(11)  |
| O2    | Ti2   | C49   | C48   | -138.17(11) | O2    | Ti2   | C49   | C50   | -14.03(17)  |
| C43   | Ti2   | C45   | C46   | -66.5(2)    | C43   | Ti2   | C45   | C49   | 50.3(2)     |
| C43   | Ti2   | C45   | C54   | 170.49(18)  | C43   | Ti2   | C46   | C45   | 138.47(13)  |
| C43   | Ti2   | C46   | C47   | 23.34(19)   | C43   | Ti2   | C46   | C53   | -99.2(2)    |
| C43   | Ti2   | C47   | C46   | -160.02(15) | C43   | Ti2   | C47   | C48   | 84.02(13)   |
| C43   | Ti2   | C47   | C52   | -39.1(2)    | C43   | Ti2   | C48   | C47   | -94.08(13)  |
| C43   | Ti2   | C48   | C49   | 150.51(14)  | C43   | Ti2   | C48   | C51   | 27.8(2)     |
| C43   | Ti2   | C49   | C45   | -148.00(12) | C43   | Ti2   | C49   | C48   | -32.84(16)  |
| C43   | Ti2   | C49   | C50   | 91.29(19)   | C44   | Ti2   | C45   | C46   | 53.64(13)   |
| C44   | Ti2   | C45   | C49   | 170.34(12)  | C44   | Ti2   | C45   | C54   | -69.4(2)    |
| C44   | Ti2   | C46   | C45   | -127.93(14) | C44   | Ti2   | C46   | C47   | 116.94(14)  |
| C44   | Ti2   | C46   | C53   | -5.6(2)     | C44   | Ti2   | C47   | C46   | -63.38(14)  |
| C44   | Ti2   | C47   | C48   | -179.34(12) | C44   | Ti2   | C47   | C52   | 57.5(2)     |
| C44   | Ti2   | C48   | C47   | 0.89(19)    | C44   | Ti2   | C48   | C49   | -114.52(15) |
| C44   | Ti2   | C48   | C51   | 122.8(2)    | C44   | Ti2   | C49   | C45   | -13.8(2)    |

Table S13-8. Torsion angles ( $^{\circ}$ ) (continued)

| atom1 | atom2 | atom3 | atom4 | angle       | atom1 | atom2 | atom3 | atom4 | angle       |
|-------|-------|-------|-------|-------------|-------|-------|-------|-------|-------------|
| C44   | Ti2   | C49   | C48   | 101.33(15)  | C44   | Ti2   | C49   | C50   | -134.53(17) |
| C45   | Ti2   | C46   | C45   | 0.00(12)    | C45   | Ti2   | C46   | C47   | -115.1(2)   |
| C45   | Ti2   | C46   | C53   | 122.3(3)    | C46   | Ti2   | C45   | C46   | 0.00(14)    |
| C46   | Ti2   | C45   | C49   | 116.7(2)    | C46   | Ti2   | C45   | C54   | -123.1(3)   |
| C45   | Ti2   | C47   | C46   | 37.51(12)   | C45   | Ti2   | C47   | C48   | -78.45(14)  |
| C45   | Ti2   | C47   | C52   | 158.4(3)    | C47   | Ti2   | C45   | C46   | -37.58(11)  |
| C47   | Ti2   | C45   | C49   | 79.12(14)   | C47   | Ti2   | C45   | C54   | -160.6(3)   |
| C45   | Ti2   | C48   | C47   | 78.24(14)   | C45   | Ti2   | C48   | C49   | -37.17(12)  |
| C45   | Ti2   | C48   | C51   | -159.9(3)   | C48   | Ti2   | C45   | C46   | -78.78(14)  |
| C48   | Ti2   | C45   | C49   | 37.92(12)   | C48   | Ti2   | C45   | C54   | 158.2(3)    |
| C45   | Ti2   | C49   | C45   | 0.00(13)    | C45   | Ti2   | C49   | C48   | 115.2(2)    |
| C45   | Ti2   | C49   | C50   | -120.7(3)   | C49   | Ti2   | C45   | C46   | -116.7(2)   |
| C49   | Ti2   | C45   | C49   | 0.00(12)    | C49   | Ti2   | C45   | C54   | 120.2(3)    |
| C46   | Ti2   | C47   | C46   | 0.00(14)    | C46   | Ti2   | C47   | C48   | -116.0(2)   |
| C46   | Ti2   | C47   | C52   | 120.9(3)    | C47   | Ti2   | C46   | C45   | 115.1(2)    |
| C47   | Ti2   | C46   | C47   | 0.00(14)    | C47   | Ti2   | C46   | C53   | -122.6(3)   |
| C46   | Ti2   | C48   | C47   | 37.13(11)   | C46   | Ti2   | C48   | C49   | -78.27(14)  |
| C46   | Ti2   | C48   | C51   | 159.0(2)    | C48   | Ti2   | C46   | C45   | 78.05(14)   |
| C48   | Ti2   | C46   | C47   | -37.08(12)  | C48   | Ti2   | C46   | C53   | -159.6(3)   |
| C46   | Ti2   | C49   | C45   | -36.80(11)  | C46   | Ti2   | C49   | C48   | 78.36(14)   |
| C46   | Ti2   | C49   | C50   | -157.5(2)   | C49   | Ti2   | C46   | C45   | 36.50(11)   |
| C49   | Ti2   | C46   | C47   | -78.63(14)  | C49   | Ti2   | C46   | C53   | 158.8(3)    |
| C47   | Ti2   | C48   | C47   | 0.00(12)    | C47   | Ti2   | C48   | C49   | -115.4(2)   |
| C47   | Ti2   | C48   | C51   | 121.9(3)    | C48   | Ti2   | C47   | C46   | 116.0(2)    |
| C48   | Ti2   | C47   | C48   | 0.00(12)    | C48   | Ti2   | C47   | C52   | -123.2(3)   |
| C47   | Ti2   | C49   | C45   | -77.92(14)  | C47   | Ti2   | C49   | C48   | 37.24(11)   |
| C47   | Ti2   | C49   | C50   | 161.4(2)    | C49   | Ti2   | C47   | C46   | 78.29(14)   |
| C49   | Ti2   | C47   | C48   | -37.67(11)  | C49   | Ti2   | C47   | C52   | -160.8(2)   |
| C48   | Ti2   | C49   | C45   | -115.2(2)   | C48   | Ti2   | C49   | C48   | -0.00(13)   |
| C48   | Ti2   | C49   | C50   | 124.1(3)    | C49   | Ti2   | C48   | C47   | 115.4(2)    |
| C49   | Ti2   | C48   | C49   | -0.00(13)   | C49   | Ti2   | C48   | C51   | -122.7(3)   |
| O3    | Ti3   | C72   | C73   | -94.16(11)  | O3    | Ti3   | C72   | C76   | 149.24(11)  |
| O3    | Ti3   | C72   | C78   | 26.0(2)     | O3    | Ti3   | C73   | C72   | 93.33(11)   |
| O3    | Ti3   | C73   | C74   | -151.52(11) | O3    | Ti3   | C73   | C81   | -27.8(2)    |
| O3    | Ti3   | C74   | C73   | 38.18(17)   | O3    | Ti3   | C74   | C75   | 154.69(10)  |
| O3    | Ti3   | C74   | C80   | -82.7(2)    | O3    | Ti3   | C75   | C74   | -58.5(3)    |
| O3    | Ti3   | C75   | C76   | 57.3(3)     | O3    | Ti3   | C75   | C79   | 179.90(16)  |

Table S13-8. Torsion angles ( $^{\circ}$ ) (continued)

| atom1 | atom2 | atom3 | atom4 | angle       | atom1 | atom2 | atom3 | atom4 | angle       |
|-------|-------|-------|-------|-------------|-------|-------|-------|-------|-------------|
| O3    | Ti3   | C76   | C72   | -40.89(18)  | O3    | Ti3   | C76   | C75   | -155.43(9)  |
| O3    | Ti3   | C76   | C77   | 82.0(2)     | C70   | Ti3   | C72   | C73   | 30.0(2)     |
| C70   | Ti3   | C72   | C76   | -86.6(2)    | C70   | Ti3   | C72   | C78   | 150.18(19)  |
| C70   | Ti3   | C73   | C72   | -159.93(12) | C70   | Ti3   | C73   | C74   | -44.79(15)  |
| C70   | Ti3   | C73   | C81   | 78.9(2)     | C70   | Ti3   | C74   | C73   | 137.43(14)  |
| C70   | Ti3   | C74   | C75   | -106.05(14) | C70   | Ti3   | C74   | C80   | 16.60(19)   |
| C70   | Ti3   | C75   | C74   | 72.60(14)   | C70   | Ti3   | C75   | C76   | -171.59(14) |
| C70   | Ti3   | C75   | C79   | -49.0(2)    | C70   | Ti3   | C76   | C72   | 125.10(15)  |
| C70   | Ti3   | C76   | C75   | 10.55(19)   | C70   | Ti3   | C76   | C77   | -112.0(2)   |
| C71   | Ti3   | C72   | C73   | 156.64(11)  | C71   | Ti3   | C72   | C76   | 40.04(15)   |
| C71   | Ti3   | C72   | C78   | -83.2(2)    | C71   | Ti3   | C73   | C72   | -36.3(2)    |
| C71   | Ti3   | C73   | C74   | 78.8(2)     | C71   | Ti3   | C73   | C81   | -157.45(18) |
| C71   | Ti3   | C74   | C73   | -131.38(13) | C71   | Ti3   | C74   | C75   | -14.86(19)  |
| C71   | Ti3   | C74   | C80   | 107.8(2)    | C71   | Ti3   | C75   | C74   | 167.91(14)  |
| C71   | Ti3   | C75   | C76   | -76.27(13)  | C71   | Ti3   | C75   | C79   | 46.4(2)     |
| C71   | Ti3   | C76   | C72   | -142.91(14) | C71   | Ti3   | C76   | C75   | 102.54(12)  |
| C71   | Ti3   | C76   | C77   | -20.05(19)  | C72   | Ti3   | C73   | C72   | -0.00(11)   |
| C72   | Ti3   | C73   | C74   | 115.1(2)    | C72   | Ti3   | C73   | C81   | -121.1(3)   |
| C73   | Ti3   | C72   | C73   | -0.00(12)   | C73   | Ti3   | C72   | C76   | -116.6(2)   |
| C73   | Ti3   | C72   | C78   | 120.2(3)    | C72   | Ti3   | C74   | C73   | -37.61(11)  |
| C72   | Ti3   | C74   | C75   | 78.90(14)   | C72   | Ti3   | C74   | C80   | -158.4(2)   |
| C74   | Ti3   | C72   | C73   | 37.49(10)   | C74   | Ti3   | C72   | C76   | -79.11(13)  |
| C74   | Ti3   | C72   | C78   | 157.7(3)    | C72   | Ti3   | C75   | C74   | -78.05(14)  |
| C72   | Ti3   | C75   | C76   | 37.77(11)   | C72   | Ti3   | C75   | C79   | 160.4(2)    |
| C75   | Ti3   | C72   | C73   | 78.43(13)   | C75   | Ti3   | C72   | C76   | -38.17(11)  |
| C75   | Ti3   | C72   | C78   | -161.4(3)   | C72   | Ti3   | C76   | C72   | 0.00(13)    |
| C72   | Ti3   | C76   | C75   | -114.5(2)   | C72   | Ti3   | C76   | C77   | 122.9(3)    |
| C76   | Ti3   | C72   | C73   | 116.6(2)    | C76   | Ti3   | C72   | C76   | 0.00(13)    |
| C76   | Ti3   | C72   | C78   | -123.2(3)   | C73   | Ti3   | C74   | C73   | 0.00(13)    |
| C73   | Ti3   | C74   | C75   | 116.5(2)    | C73   | Ti3   | C74   | C80   | -120.8(3)   |
| C74   | Ti3   | C73   | C72   | -115.1(2)   | C74   | Ti3   | C73   | C74   | 0.00(12)    |
| C74   | Ti3   | C73   | C81   | 123.7(3)    | C73   | Ti3   | C75   | C74   | -36.86(12)  |
| C73   | Ti3   | C75   | C76   | 78.96(13)   | C73   | Ti3   | C75   | C79   | -158.4(2)   |
| C75   | Ti3   | C73   | C72   | -78.45(13)  | C75   | Ti3   | C73   | C74   | 36.69(11)   |
| C75   | Ti3   | C73   | C81   | 160.4(3)    | C73   | Ti3   | C76   | C72   | 36.77(11)   |
| C73   | Ti3   | C76   | C75   | -77.78(13)  | C73   | Ti3   | C76   | C77   | 159.6(2)    |
| C76   | Ti3   | C73   | C72   | -36.84(11)  | C76   | Ti3   | C73   | C74   | 78.30(13)   |

Table S13-8. Torsion angles ( $^{\circ}$ ) (continued)

| atom1 | atom2 | atom3 | atom4 | angle       | atom1 | atom2 | atom3 | atom4 | angle       |
|-------|-------|-------|-------|-------------|-------|-------|-------|-------|-------------|
| C76   | Ti3   | C73   | C81   | -158.0(3)   | C74   | Ti3   | C75   | C74   | 0.00(12)    |
| C74   | Ti3   | C75   | C76   | 115.8(2)    | C74   | Ti3   | C75   | C79   | -121.5(3)   |
| C75   | Ti3   | C74   | C73   | -116.5(2)   | C75   | Ti3   | C74   | C75   | 0.00(13)    |
| C75   | Ti3   | C74   | C80   | 122.7(3)    | C74   | Ti3   | C76   | C72   | 77.69(13)   |
| C74   | Ti3   | C76   | C75   | -36.86(10)  | C74   | Ti3   | C76   | C77   | -159.4(2)   |
| C76   | Ti3   | C74   | C73   | -78.90(13)  | C76   | Ti3   | C74   | C75   | 37.62(11)   |
| C76   | Ti3   | C74   | C80   | 160.3(2)    | C75   | Ti3   | C76   | C72   | 114.5(2)    |
| C75   | Ti3   | C76   | C75   | -0.00(12)   | C75   | Ti3   | C76   | C77   | -122.6(3)   |
| C76   | Ti3   | C75   | C74   | -115.8(2)   | C76   | Ti3   | C75   | C76   | -0.00(11)   |
| C76   | Ti3   | C75   | C79   | 122.6(3)    | C1    | N1    | C28   | C29   | -155.87(17) |
| C28   | N1    | C1    | C2    | 75.2(2)     | C1    | N1    | C55   | C56   | 75.7(2)     |
| C55   | N1    | C1    | C2    | -160.66(15) | C28   | N1    | C55   | C56   | -160.19(16) |
| C55   | N1    | C28   | C29   | 79.5(2)     | N1    | C1    | C2    | C3    | 15.9(3)     |
| N1    | C1    | C2    | C7    | -163.74(16) | C1    | C2    | C3    | C4    | -178.84(17) |
| C1    | C2    | C7    | O1    | 0.8(3)      | C1    | C2    | C7    | C6    | 179.10(17)  |
| C3    | C2    | C7    | O1    | -178.83(17) | C3    | C2    | C7    | C6    | -0.6(3)     |
| C7    | C2    | C3    | C4    | 0.8(3)      | C2    | C3    | C4    | C5    | -0.6(3)     |
| C2    | C3    | C4    | C12   | 178.90(17)  | C3    | C4    | C5    | C6    | 0.2(3)      |
| C3    | C4    | C12   | C13   | -63.4(2)    | C3    | C4    | C12   | C14   | 55.6(2)     |
| C3    | C4    | C12   | C15   | 175.53(17)  | C5    | C4    | C12   | C13   | 116.1(2)    |
| C5    | C4    | C12   | C14   | -124.9(2)   | C5    | C4    | C12   | C15   | -5.0(3)     |
| C12   | C4    | C5    | C6    | -179.31(17) | C4    | C5    | C6    | C7    | 0.0(3)      |
| C4    | C5    | C6    | C8    | 177.96(17)  | C5    | C6    | C7    | O1    | 178.32(17)  |
| C5    | C6    | C7    | C2    | 0.1(3)      | C5    | C6    | C8    | C9    | -112.9(2)   |
| C5    | C6    | C8    | C10   | 124.9(2)    | C5    | C6    | C8    | C11   | 6.3(3)      |
| C7    | C6    | C8    | C9    | 64.9(3)     | C7    | C6    | C8    | C10   | -57.3(2)    |
| C7    | C6    | C8    | C11   | -175.86(17) | C8    | C6    | C7    | O1    | 0.4(3)      |
| C8    | C6    | C7    | C2    | -177.75(17) | Ti1   | C18   | C19   | Ti1   | 0.000(10)   |
| Ti1   | C18   | C19   | C20   | 64.81(14)   | Ti1   | C18   | C19   | C26   | -120.3(2)   |
| Ti1   | C18   | C22   | Ti1   | -0.000(10)  | Ti1   | C18   | C22   | C21   | -65.94(14)  |
| Ti1   | C18   | C22   | C23   | 117.7(2)    | C19   | C18   | C22   | Ti1   | 65.65(17)   |
| C19   | C18   | C22   | C21   | -0.3(3)     | C19   | C18   | C22   | C23   | -176.6(2)   |
| C22   | C18   | C19   | Ti1   | -65.25(17)  | C22   | C18   | C19   | C20   | -0.4(3)     |
| C22   | C18   | C19   | C26   | 174.5(2)    | C27   | C18   | C19   | Ti1   | 115.9(3)    |
| C27   | C18   | C19   | C20   | -179.3(2)   | C27   | C18   | C19   | C26   | -4.4(4)     |
| C27   | C18   | C22   | Ti1   | -115.4(3)   | C27   | C18   | C22   | C21   | 178.6(2)    |
| C27   | C18   | C22   | C23   | 2.3(4)      | Ti1   | C19   | C20   | Ti1   | -0.0        |

Table S13-8. Torsion angles ( $^{\circ}$ ) (continued)

| atom1 | atom2 | atom3 | atom4 | angle       | atom1 | atom2 | atom3 | atom4 | angle       |
|-------|-------|-------|-------|-------------|-------|-------|-------|-------|-------------|
| Ti1   | C19   | C20   | C21   | 64.88(14)   | Ti1   | C19   | C20   | C25   | -120.9(2)   |
| C18   | C19   | C20   | Ti1   | -63.88(18)  | C18   | C19   | C20   | C21   | 1.0(3)      |
| C18   | C19   | C20   | C25   | 175.3(2)    | C26   | C19   | C20   | Ti1   | 121.0(3)    |
| C26   | C19   | C20   | C21   | -174.2(2)   | C26   | C19   | C20   | C25   | 0.1(4)      |
| Ti1   | C20   | C21   | Ti1   | -0.0        | Ti1   | C20   | C21   | C22   | 62.93(14)   |
| Ti1   | C20   | C21   | C24   | -122.3(2)   | C19   | C20   | C21   | Ti1   | -64.12(17)  |
| C19   | C20   | C21   | C22   | -1.2(3)     | C19   | C20   | C21   | C24   | 173.6(2)    |
| C25   | C20   | C21   | Ti1   | 121.7(3)    | C25   | C20   | C21   | C22   | -175.4(2)   |
| C25   | C20   | C21   | C24   | -0.6(4)     | Ti1   | C21   | C22   | Ti1   | -0.000(10)  |
| Ti1   | C21   | C22   | C18   | 64.76(14)   | Ti1   | C21   | C22   | C23   | -118.8(2)   |
| C20   | C21   | C22   | Ti1   | -63.84(17)  | C20   | C21   | C22   | C18   | 0.9(3)      |
| C20   | C21   | C22   | C23   | 177.4(2)    | C24   | C21   | C22   | Ti1   | 121.4(3)    |
| C24   | C21   | C22   | C18   | -173.8(2)   | C24   | C21   | C22   | C23   | 2.6(4)      |
| N1    | C28   | C29   | C30   | 10.2(3)     | N1    | C28   | C29   | C34   | -168.58(18) |
| C28   | C29   | C30   | C31   | -177.11(19) | C28   | C29   | C34   | O2    | -5.0(3)     |
| C28   | C29   | C34   | C33   | 172.86(19)  | C30   | C29   | C34   | O2    | 176.3(2)    |
| C30   | C29   | C34   | C33   | -5.9(3)     | C34   | C29   | C30   | C31   | 1.6(3)      |
| C29   | C30   | C31   | C32   | 2.1(4)      | C29   | C30   | C31   | C39   | -180.0(2)   |
| C30   | C31   | C32   | C33   | -1.6(4)     | C30   | C31   | C39   | C40   | 4.0(3)      |
| C30   | C31   | C39   | C41   | -114.9(2)   | C30   | C31   | C39   | C42   | 125.1(2)    |
| C32   | C31   | C39   | C40   | -178.1(2)   | C32   | C31   | C39   | C41   | 63.0(3)     |
| C32   | C31   | C39   | C42   | -57.0(3)    | C39   | C31   | C32   | C33   | -179.6(2)   |
| C31   | C32   | C33   | C34   | -2.5(4)     | C31   | C32   | C33   | C35   | 174.8(2)    |
| C32   | C33   | C34   | O2    | -176.1(2)   | C32   | C33   | C34   | C29   | 6.2(3)      |
| C32   | C33   | C35   | C36   | -121.2(2)   | C32   | C33   | C35   | C37   | -2.7(3)     |
| C32   | C33   | C35   | C38   | 117.6(2)    | C34   | C33   | C35   | C36   | 55.9(3)     |
| C34   | C33   | C35   | C37   | 174.4(2)    | C34   | C33   | C35   | C38   | -65.3(3)    |
| C35   | C33   | C34   | O2    | 6.7(4)      | C35   | C33   | C34   | C29   | -171.0(2)   |
| Ti2   | C45   | C46   | Ti2   | 0.000(10)   | Ti2   | C45   | C46   | C47   | 64.41(19)   |
| Ti2   | C45   | C46   | C53   | -123.2(3)   | Ti2   | C45   | C49   | Ti2   | 0.0         |
| Ti2   | C45   | C49   | C48   | -65.42(17)  | Ti2   | C45   | C49   | C50   | 118.5(3)    |
| C46   | C45   | C49   | Ti2   | 65.4(2)     | C46   | C45   | C49   | C48   | -0.0(3)     |
| C46   | C45   | C49   | C50   | -176.1(3)   | C49   | C45   | C46   | Ti2   | -64.2(2)    |
| C49   | C45   | C46   | C47   | 0.2(3)      | C49   | C45   | C46   | C53   | 172.7(3)    |
| C54   | C45   | C46   | Ti2   | 123.7(3)    | C54   | C45   | C46   | C47   | -171.9(3)   |
| C54   | C45   | C46   | C53   | 0.5(5)      | C54   | C45   | C49   | Ti2   | -122.4(3)   |
| C54   | C45   | C49   | C48   | 172.2(3)    | C54   | C45   | C49   | C50   | -3.8(5)     |

Table S13-8. Torsion angles ( $^{\circ}$ ) (continued)

| atom1 | atom2 | atom3 | atom4 | angle       | atom1 | atom2 | atom3 | atom4 | angle       |
|-------|-------|-------|-------|-------------|-------|-------|-------|-------|-------------|
| Ti2   | C46   | C47   | Ti2   | 0.000(10)   | Ti2   | C46   | C47   | C48   | 63.61(19)   |
| Ti2   | C46   | C47   | C52   | -119.8(3)   | C45   | C46   | C47   | Ti2   | -64.0(2)    |
| C45   | C46   | C47   | C48   | -0.3(4)     | C45   | C46   | C47   | C52   | 176.3(3)    |
| C53   | C46   | C47   | Ti2   | 123.6(4)    | C53   | C46   | C47   | C48   | -172.8(3)   |
| C53   | C46   | C47   | C52   | 3.8(6)      | Ti2   | C47   | C48   | Ti2   | 0.0         |
| Ti2   | C47   | C48   | C49   | 65.10(18)   | Ti2   | C47   | C48   | C51   | -119.7(3)   |
| C46   | C47   | C48   | Ti2   | -64.8(2)    | C46   | C47   | C48   | C49   | 0.3(3)      |
| C46   | C47   | C48   | C51   | 175.5(3)    | C52   | C47   | C48   | Ti2   | 118.7(4)    |
| C52   | C47   | C48   | C49   | -176.2(3)   | C52   | C47   | C48   | C51   | -1.0(5)     |
| Ti2   | C48   | C49   | Ti2   | -0.0        | Ti2   | C48   | C49   | C45   | 66.09(17)   |
| Ti2   | C48   | C49   | C50   | -118.0(3)   | C47   | C48   | C49   | Ti2   | -66.3(2)    |
| C47   | C48   | C49   | C45   | -0.2(3)     | C47   | C48   | C49   | C50   | 175.7(3)    |
| C51   | C48   | C49   | Ti2   | 118.6(3)    | C51   | C48   | C49   | C45   | -175.3(3)   |
| C51   | C48   | C49   | C50   | 0.6(5)      | N1    | C55   | C56   | C57   | 13.3(3)     |
| N1    | C55   | C56   | C61   | -164.35(17) | C55   | C56   | C57   | C58   | -176.43(18) |
| C55   | C56   | C61   | O3    | -6.2(3)     | C55   | C56   | C61   | C60   | 171.79(18)  |
| C57   | C56   | C61   | O3    | 176.09(19)  | C57   | C56   | C61   | C60   | -5.9(3)     |
| C61   | C56   | C57   | C58   | 1.2(3)      | C56   | C57   | C58   | C59   | 2.8(3)      |
| C56   | C57   | C58   | C66   | -178.78(19) | C57   | C58   | C59   | C60   | -2.4(4)     |
| C57   | C58   | C66   | C67   | 118.8(2)    | C57   | C58   | C66   | C68   | -122.4(2)   |
| C57   | C58   | C66   | C69   | -1.7(4)     | C59   | C58   | C66   | C67   | -62.9(3)    |
| C59   | C58   | C66   | C68   | 55.9(3)     | C59   | C58   | C66   | C69   | 176.6(2)    |
| C66   | C58   | C59   | C60   | 179.2(2)    | C58   | C59   | C60   | C61   | -2.1(4)     |
| C58   | C59   | C60   | C62   | 173.9(2)    | C59   | C60   | C61   | O3    | -175.9(2)   |
| C59   | C60   | C61   | C56   | 6.2(3)      | C59   | C60   | C62   | C63   | -119.6(2)   |
| C59   | C60   | C62   | C64   | -1.6(3)     | C59   | C60   | C62   | C65   | 119.0(2)    |
| C61   | C60   | C62   | C63   | 56.1(3)     | C61   | C60   | C62   | C64   | 174.2(2)    |
| C61   | C60   | C62   | C65   | -65.3(3)    | C62   | C60   | C61   | O3    | 8.2(4)      |
| C62   | C60   | C61   | C56   | -169.7(2)   | Ti3   | C72   | C73   | Ti3   | 0.0         |
| Ti3   | C72   | C73   | C74   | -65.31(16)  | Ti3   | C72   | C73   | C81   | 119.6(2)    |
| Ti3   | C72   | C76   | Ti3   | 0.000(11)   | Ti3   | C72   | C76   | C75   | 65.31(15)   |
| Ti3   | C72   | C76   | C77   | -119.2(2)   | C73   | C72   | C76   | Ti3   | -65.0(2)    |
| C73   | C72   | C76   | C75   | 0.3(3)      | C73   | C72   | C76   | C77   | 175.8(2)    |
| C76   | C72   | C73   | Ti3   | 65.0(2)     | C76   | C72   | C73   | C74   | -0.3(3)     |
| C76   | C72   | C73   | C81   | -175.5(2)   | C78   | C72   | C73   | Ti3   | -122.7(3)   |
| C78   | C72   | C73   | C74   | 172.0(2)    | C78   | C72   | C73   | C81   | -3.2(4)     |
| C78   | C72   | C76   | Ti3   | 122.9(3)    | C78   | C72   | C76   | C75   | -171.7(2)   |

Table S13-8. Torsion angles ( $^{\circ}$ ) (continued)

| atom1 | atom2 | atom3 | atom4 | angle      | atom1 | atom2 | atom3 | atom4 | angle      |
|-------|-------|-------|-------|------------|-------|-------|-------|-------|------------|
| C78   | C72   | C76   | C77   | 3.7(4)     | Ti3   | C73   | C74   | Ti3   | 0.000(10)  |
| Ti3   | C73   | C74   | C75   | -64.56(16) | Ti3   | C73   | C74   | C80   | 121.6(2)   |
| C72   | C73   | C74   | Ti3   | 64.78(19)  | C72   | C73   | C74   | C75   | 0.2(3)     |
| C72   | C73   | C74   | C80   | -173.6(2)  | C81   | C73   | C74   | Ti3   | -120.2(3)  |
| C81   | C73   | C74   | C75   | 175.2(3)   | C81   | C73   | C74   | C80   | 1.4(4)     |
| Ti3   | C74   | C75   | Ti3   | -0.000(10) | Ti3   | C74   | C75   | C76   | -64.33(15) |
| Ti3   | C74   | C75   | C79   | 116.5(2)   | C73   | C74   | C75   | Ti3   | 64.30(19)  |
| C73   | C74   | C75   | C76   | -0.0(3)    | C73   | C74   | C75   | C79   | -179.2(2)  |
| C80   | C74   | C75   | Ti3   | -121.9(3)  | C80   | C74   | C75   | C76   | 173.7(2)   |
| C80   | C74   | C75   | C79   | -5.4(4)    | Ti3   | C75   | C76   | Ti3   | -0.000(10) |
| Ti3   | C75   | C76   | C72   | -64.92(15) | Ti3   | C75   | C76   | C77   | 119.6(2)   |
| C74   | C75   | C76   | Ti3   | 64.75(19)  | C74   | C75   | C76   | C72   | -0.2(3)    |
| C74   | C75   | C76   | C77   | -175.7(2)  | C79   | C75   | C76   | Ti3   | -116.1(3)  |
| C79   | C75   | C76   | C72   | 178.9(2)   | C79   | C75   | C76   | C77   | 3.4(4)     |



Table S13-9. Intramolecular contacts less than 3.60 Å

| atom | atom | distance | atom | atom | distance |
|------|------|----------|------|------|----------|
| O1   | C1   | 2.788(3) | O1   | C8   | 2.959(3) |
| O1   | C9   | 3.136(3) | O1   | C10  | 3.014(3) |
| O1   | C27  | 3.321(3) | O2   | C28  | 2.769(3) |
| O2   | C35  | 2.976(3) | O2   | C36  | 3.032(3) |
| O2   | C38  | 3.136(3) | O2   | C50  | 3.454(4) |
| O3   | C55  | 2.766(3) | O3   | C62  | 2.964(3) |
| O3   | C63  | 3.051(3) | O3   | C65  | 3.105(3) |
| N1   | C3   | 2.784(3) | N1   | C30  | 2.792(3) |
| N1   | C57  | 2.831(3) | C1   | C26  | 3.478(4) |
| C1   | C56  | 3.094(3) | C1   | C57  | 3.250(3) |
| C2   | C5   | 2.763(3) | C2   | C28  | 3.058(3) |
| C3   | C6   | 2.809(3) | C3   | C13  | 3.066(4) |
| C3   | C14  | 2.988(4) | C3   | C28  | 3.208(3) |
| C3   | C54  | 3.592(4) | C4   | C7   | 2.816(3) |
| C5   | C9   | 3.537(3) | C5   | C11  | 2.845(3) |
| C5   | C13  | 3.585(4) | C5   | C15  | 2.906(4) |
| C7   | C9   | 3.132(3) | C7   | C10  | 3.089(3) |
| C10  | C23  | 3.594(4) | C16  | C25  | 3.179(4) |
| C17  | C24  | 3.196(4) | C23  | C24  | 3.153(4) |
| C23  | C27  | 3.204(4) | C24  | C25  | 3.176(4) |
| C25  | C26  | 3.141(4) | C26  | C27  | 3.242(4) |
| C26  | C56  | 3.596(4) | C26  | C61  | 3.579(4) |
| C29  | C32  | 2.756(3) | C29  | C55  | 3.109(3) |
| C30  | C33  | 2.814(3) | C30  | C40  | 2.867(4) |
| C30  | C41  | 3.558(4) | C30  | C55  | 3.239(3) |
| C31  | C34  | 2.816(3) | C32  | C36  | 3.593(4) |
| C32  | C37  | 2.850(4) | C32  | C41  | 3.099(4) |
| C32  | C42  | 3.046(5) | C34  | C36  | 3.046(3) |
| C34  | C38  | 3.185(3) | C38  | C50  | 3.521(4) |
| C43  | C51  | 3.241(5) | C43  | C52  | 3.480(5) |
| C44  | C53  | 3.197(5) | C50  | C51  | 3.237(4) |
| C50  | C54  | 3.106(5) | C51  | C52  | 3.189(6) |
| C52  | C53  | 3.171(5) | C53  | C54  | 3.197(5) |
| C56  | C59  | 2.757(3) | C57  | C60  | 2.815(4) |
| C57  | C67  | 3.591(5) | C57  | C69  | 2.886(4) |
| C58  | C61  | 2.813(3) | C59  | C63  | 3.590(4) |
| C59  | C64  | 2.856(4) | C59  | C67  | 3.079(5) |

Table S13-9. Intramolecular contacts less than 3.60 Å (continued)

| atom | atom | distance | atom | atom | distance |
|------|------|----------|------|------|----------|
| C59  | C68  | 3.036(4) | C61  | C63  | 3.065(4) |
| C61  | C65  | 3.178(4) | C70  | C80  | 3.171(5) |
| C71  | C77  | 3.179(5) | C77  | C78  | 3.216(5) |
| C77  | C79  | 3.223(5) | C78  | C81  | 3.125(6) |
| C79  | C80  | 3.175(5) | C80  | C81  | 3.182(5) |

Table S13-10. Intramolecular contacts less than 3.60 Å involving hydrogens

| atom | atom | distance | atom | atom | distance |
|------|------|----------|------|------|----------|
| Ti1  | H1A  | 3.118    | Ti1  | H1B  | 3.517    |
| Ti1  | H9B  | 3.439    | Ti1  | H10C | 3.032    |
| Ti1  | H23C | 3.371    | Ti1  | H24C | 3.492    |
| Ti1  | H25B | 3.467    | Ti1  | H27B | 3.318    |
| Ti1  | H26B | 3.42(3)  | Ti2  | H28A | 3.313    |
| Ti2  | H28B | 3.379    | Ti2  | H36A | 3.300    |
| Ti2  | H38A | 3.129    | Ti2  | H50B | 3.379    |
| Ti2  | H51B | 3.392    | Ti2  | H52B | 3.430    |
| Ti2  | H53C | 3.533    | Ti2  | H54C | 3.494    |
| Ti3  | H55A | 3.215    | Ti3  | H55B | 3.415    |
| Ti3  | H63A | 3.310    | Ti3  | H65A | 3.119    |
| Ti3  | H77C | 3.422    | Ti3  | H78C | 3.487    |
| Ti3  | H79B | 3.357    | Ti3  | H80C | 3.490    |
| Ti3  | H81B | 3.420    | O1   | H1A  | 2.538    |
| O1   | H1B  | 2.935    | O1   | H9B  | 2.494    |
| O1   | H10B | 3.464    | O1   | H10C | 2.339    |
| O1   | H16B | 3.288    | O1   | H16C | 3.288    |
| O1   | H17B | 3.238    | O1   | H17C | 3.238    |
| O1   | H27A | 3.550    | O1   | H27B | 2.816    |
| O1   | H54A | 3.594    | O2   | H28A | 2.599    |
| O2   | H28B | 2.814    | O2   | H36A | 2.344    |
| O2   | H36B | 3.509    | O2   | H38A | 2.481    |
| O2   | H43B | 3.194    | O2   | H43C | 3.194    |
| O2   | H44B | 3.309    | O2   | H44C | 3.309    |
| O2   | H50B | 2.914    | O2   | H54C | 3.439    |
| O3   | H55A | 2.545    | O3   | H55B | 2.849    |
| O3   | H63A | 2.375    | O3   | H63B | 3.540    |
| O3   | H65A | 2.443    | O3   | H70B | 3.218    |
| O3   | H70C | 3.218    | O3   | H71B | 3.248    |
| O3   | H71C | 3.248    | O3   | H78C | 3.252    |
| O3   | H81B | 3.185    | O3   | H26B | 3.50(3)  |
| N1   | H3   | 2.413    | N1   | H30  | 2.418    |
| N1   | H57  | 2.478    | C1   | H3   | 2.657    |
| C1   | H16B | 3.161    | C1   | H27B | 3.044    |
| C1   | H28A | 2.787    | C1   | H28B | 2.445    |
| C1   | H55A | 2.515    | C1   | H55B | 3.246    |
| C1   | H57  | 2.901    | C1   | H26A | 3.17(3)  |

Table S13-10. Intramolecular contacts less than 3.60 Å involving hydrogens (continued)

| atom | atom | distance | atom | atom | distance |
|------|------|----------|------|------|----------|
| C1   | H26B | 3.09(3)  | C2   | H27B | 2.991    |
| C2   | H28B | 2.641    | C2   | H54A | 3.187    |
| C2   | H54C | 3.182    | C2   | H57  | 3.336    |
| C3   | H1A  | 3.225    | C3   | H1B  | 3.057    |
| C3   | H5   | 3.235    | C3   | H13A | 2.743    |
| C3   | H13C | 3.378    | C3   | H14A | 2.658    |
| C3   | H14B | 3.255    | C3   | H28B | 2.784    |
| C3   | H30  | 3.471    | C3   | H54A | 3.495    |
| C3   | H54C | 2.939    | C3   | H57  | 3.183    |
| C3   | H69C | 3.522    | C4   | H13A | 2.665    |
| C4   | H13B | 3.354    | C4   | H13C | 2.713    |
| C4   | H14A | 2.663    | C4   | H14B | 2.700    |
| C4   | H14C | 3.351    | C4   | H15A | 2.733    |
| C4   | H15B | 2.753    | C4   | H15C | 3.386    |
| C4   | H54B | 3.582    | C4   | H54C | 3.229    |
| C5   | H3   | 3.241    | C5   | H9C  | 3.412    |
| C5   | H10B | 3.582    | C5   | H11B | 2.708    |
| C5   | H11C | 2.785    | C5   | H13C | 3.498    |
| C5   | H14B | 3.588    | C5   | H15A | 2.822    |
| C5   | H15B | 2.799    | C5   | H54A | 3.557    |
| C5   | H54B | 3.561    | C6   | H9A  | 3.351    |
| C6   | H9B  | 2.685    | C6   | H9C  | 2.685    |
| C6   | H10A | 3.362    | C6   | H10B | 2.705    |
| C6   | H10C | 2.705    | C6   | H11A | 3.384    |
| C6   | H11B | 2.743    | C6   | H11C | 2.743    |
| C6   | H54A | 3.282    | C7   | H1A  | 2.673    |
| C7   | H1B  | 2.870    | C7   | H3   | 3.268    |
| C7   | H5   | 3.257    | C7   | H9B  | 2.840    |
| C7   | H9C  | 3.396    | C7   | H10B | 3.324    |
| C7   | H10C | 2.797    | C7   | H27B | 2.900    |
| C7   | H54A | 3.071    | C8   | H5   | 2.680    |
| C9   | H10A | 2.729    | C9   | H10B | 3.386    |
| C9   | H10C | 2.740    | C9   | H11A | 2.665    |
| C9   | H11B | 2.663    | C9   | H11C | 3.342    |
| C9   | H17B | 3.432    | C9   | H17C | 3.429    |
| C9   | H54A | 3.540    | C10  | H9A  | 2.725    |
| C10  | H9B  | 2.746    | C10  | H9C  | 3.385    |

Table S13-10. Intramolecular contacts less than 3.60 Å involving hydrogens (continued)

| atom | atom | distance | atom | atom | distance |
|------|------|----------|------|------|----------|
| C10  | H11A | 2.635    | C10  | H11B | 3.325    |
| C10  | H11C | 2.644    | C10  | H17C | 3.267    |
| C10  | H23A | 3.186    | C10  | H23C | 3.195    |
| C11  | H5   | 2.425    | C11  | H9A  | 2.650    |
| C11  | H9B  | 3.340    | C11  | H9C  | 2.681    |
| C11  | H10A | 2.625    | C11  | H10B | 2.657    |
| C11  | H10C | 3.324    | C12  | H3   | 2.652    |
| C12  | H5   | 2.732    | C13  | H3   | 2.922    |
| C13  | H14A | 2.695    | C13  | H14B | 3.348    |
| C13  | H14C | 2.671    | C13  | H15A | 3.341    |
| C13  | H15B | 2.673    | C13  | H15C | 2.673    |
| C13  | H54C | 3.308    | C14  | H3   | 2.778    |
| C14  | H13A | 2.696    | C14  | H13B | 2.667    |
| C14  | H13C | 3.349    | C14  | H15A | 2.676    |
| C14  | H15B | 3.338    | C14  | H15C | 2.653    |
| C14  | H40B | 3.492    | C14  | H69A | 3.237    |
| C14  | H69C | 3.492    | C15  | H5   | 2.518    |
| C15  | H13A | 3.340    | C15  | H13B | 2.674    |
| C15  | H13C | 2.674    | C15  | H14A | 3.336    |
| C15  | H14B | 2.667    | C15  | H14C | 2.666    |
| C16  | H1A  | 2.870    | C16  | H17A | 3.365    |
| C16  | H17B | 3.121    | C16  | H25A | 3.219    |
| C16  | H25B | 2.800    | C16  | H44B | 3.418    |
| C16  | H53C | 3.505    | C16  | H26B | 3.17(3)  |
| C17  | H9B  | 2.945    | C17  | H10C | 3.152    |
| C17  | H16A | 3.384    | C17  | H16C | 3.101    |
| C17  | H23C | 3.030    | C17  | H24A | 3.228    |
| C17  | H24C | 2.837    | C18  | H1B  | 3.384    |
| C18  | H10C | 3.539    | C18  | H23A | 2.693    |
| C18  | H23B | 3.203    | C18  | H23C | 3.244    |
| C18  | H26A | 2.75(3)  | C18  | H26B | 3.24(3)  |
| C18  | H26C | 3.21(5)  | C19  | H1B  | 3.188    |
| C19  | H16A | 3.395    | C19  | H16B | 3.288    |
| C19  | H25A | 2.669    | C19  | H25B | 3.247    |
| C19  | H25C | 3.178    | C19  | H27A | 3.384    |
| C19  | H27B | 2.881    | C19  | H27C | 2.881    |
| C20  | H16A | 2.749    | C20  | H16B | 3.334    |

Table S13-10. Intramolecular contacts less than 3.60 Å involving hydrogens (continued)

| atom | atom | distance | atom | atom | distance |
|------|------|----------|------|------|----------|
| C20  | H17A | 3.506    | C20  | H24A | 3.366    |
| C20  | H24B | 2.855    | C20  | H24C | 2.854    |
| C20  | H26A | 3.39(3)  | C20  | H26B | 2.86(3)  |
| C20  | H26C | 2.82(4)  | C21  | H16A | 3.497    |
| C21  | H17A | 2.759    | C21  | H17C | 3.305    |
| C21  | H23A | 3.365    | C21  | H23B | 2.843    |
| C21  | H23C | 2.843    | C21  | H25A | 3.366    |
| C21  | H25B | 2.859    | C21  | H25C | 2.859    |
| C22  | H10C | 3.241    | C22  | H17A | 3.372    |
| C22  | H17C | 3.217    | C22  | H24A | 2.671    |
| C22  | H24B | 3.181    | C22  | H24C | 3.242    |
| C22  | H27A | 2.673    | C22  | H27B | 3.224    |
| C22  | H27C | 3.211    | C23  | H10C | 2.901    |
| C23  | H17C | 3.172    | C23  | H24A | 2.716    |
| C23  | H27A | 2.772    | C24  | H17A | 2.535    |
| C24  | H17C | 3.427    | C24  | H23B | 3.099    |
| C24  | H23C | 3.128    | C24  | H25B | 3.150    |
| C24  | H25C | 3.143    | C25  | H16A | 2.505    |
| C25  | H16B | 3.432    | C25  | H24B | 3.149    |
| C25  | H24C | 3.142    | C25  | H26B | 3.13(3)  |
| C25  | H26C | 3.06(4)  | C26  | H1A  | 3.378    |
| C26  | H1B  | 2.708    | C26  | H16B | 3.320    |
| C26  | H25A | 2.700    | C26  | H27B | 3.242    |
| C26  | H27C | 3.196    | C26  | H55A | 3.231    |
| C26  | H63A | 3.498    | C26  | H63B | 3.287    |
| C27  | H1B  | 3.133    | C27  | H10C | 3.549    |
| C27  | H23A | 2.779    | C27  | H68B | 3.520    |
| C27  | H26A | 2.87(3)  | C28  | H1A  | 2.509    |
| C28  | H1B  | 3.247    | C28  | H3   | 2.859    |
| C28  | H30  | 2.673    | C28  | H44B | 3.041    |
| C28  | H54C | 2.906    | C28  | H55A | 2.745    |
| C28  | H55B | 2.459    | C29  | H3   | 3.204    |
| C29  | H13A | 3.488    | C29  | H54C | 3.379    |
| C29  | H55B | 2.714    | C29  | H78A | 3.175    |
| C30  | H3   | 3.049    | C30  | H13A | 3.324    |
| C30  | H28A | 3.208    | C30  | H28B | 3.101    |
| C30  | H32  | 3.231    | C30  | H40A | 2.725    |

Table S13-10. Intramolecular contacts less than 3.60 Å involving hydrogens (continued)

| atom | atom | distance | atom | atom | distance |
|------|------|----------|------|------|----------|
| C30  | H40B | 2.820    | C30  | H41A | 3.446    |
| C30  | H42A | 3.560    | C30  | H55B | 2.796    |
| C30  | H57  | 3.562    | C30  | H78A | 3.177    |
| C30  | H78C | 3.412    | C31  | H40A | 2.738    |
| C31  | H40B | 2.764    | C31  | H40C | 3.391    |
| C31  | H41A | 2.691    | C31  | H41B | 3.358    |
| C31  | H41C | 2.696    | C31  | H42A | 2.683    |
| C31  | H42B | 2.685    | C31  | H42C | 3.349    |
| C31  | H78A | 3.395    | C32  | H30  | 3.239    |
| C32  | H36B | 3.509    | C32  | H37A | 2.750    |
| C32  | H37C | 2.748    | C32  | H38C | 3.536    |
| C32  | H41A | 3.356    | C32  | H41C | 2.813    |
| C32  | H42A | 3.280    | C32  | H42B | 2.751    |
| C32  | H78A | 3.527    | C33  | H36A | 2.659    |
| C33  | H36B | 2.678    | C33  | H36C | 3.344    |
| C33  | H37A | 2.749    | C33  | H37B | 3.385    |
| C33  | H37C | 2.730    | C33  | H38A | 2.705    |
| C33  | H38B | 3.379    | C33  | H38C | 2.747    |
| C33  | H50B | 3.494    | C33  | H78A | 3.548    |
| C34  | H28A | 2.684    | C34  | H28B | 2.824    |
| C34  | H30  | 3.270    | C34  | H32  | 3.256    |
| C34  | H36A | 2.725    | C34  | H36B | 3.282    |
| C34  | H38A | 2.884    | C34  | H38C | 3.489    |
| C34  | H50B | 3.059    | C34  | H78A | 3.415    |
| C35  | H32  | 2.693    | C36  | H37A | 3.332    |
| C36  | H37B | 2.654    | C36  | H37C | 2.654    |
| C36  | H38A | 2.735    | C36  | H38B | 2.696    |
| C36  | H38C | 3.370    | C36  | H43B | 3.351    |
| C36  | H43C | 3.249    | C36  | H77B | 3.411    |
| C37  | H32  | 2.437    | C37  | H36A | 3.330    |
| C37  | H36B | 2.655    | C37  | H36C | 2.655    |
| C37  | H38A | 3.332    | C37  | H38B | 2.658    |
| C37  | H38C | 2.658    | C38  | H36A | 2.735    |
| C38  | H36B | 3.371    | C38  | H36C | 2.695    |
| C38  | H37A | 2.662    | C38  | H37B | 2.649    |
| C38  | H37C | 3.334    | C38  | H43C | 3.290    |
| C38  | H50A | 3.043    | C38  | H50B | 3.195    |

Table S13-10. Intramolecular contacts less than 3.60 Å involving hydrogens (continued)

| atom | atom | distance | atom | atom | distance |
|------|------|----------|------|------|----------|
| C38  | H51B | 3.221    | C39  | H30  | 2.705    |
| C39  | H32  | 2.675    | C40  | H30  | 2.471    |
| C40  | H41A | 2.663    | C40  | H41B | 2.621    |
| C40  | H41C | 3.323    | C40  | H42A | 2.682    |
| C40  | H42B | 3.327    | C40  | H42C | 2.627    |
| C40  | H69A | 3.361    | C41  | H32  | 2.949    |
| C41  | H40A | 2.659    | C41  | H40B | 3.323    |
| C41  | H40C | 2.625    | C41  | H42A | 3.339    |
| C41  | H42B | 2.670    | C41  | H42C | 2.671    |
| C41  | H78B | 3.495    | C42  | H32  | 2.853    |
| C42  | H40A | 3.324    | C42  | H40B | 2.658    |
| C42  | H40C | 2.658    | C42  | H41A | 3.335    |
| C42  | H41B | 2.675    | C42  | H41C | 2.675    |
| C43  | H36A | 2.803    | C43  | H38A | 3.260    |
| C43  | H44A | 3.431    | C43  | H44C | 3.134    |
| C43  | H51A | 3.192    | C43  | H51B | 2.948    |
| C43  | H52B | 2.864    | C44  | H28A | 2.897    |
| C44  | H28B | 3.543    | C44  | H43A | 3.394    |
| C44  | H43B | 3.157    | C44  | H53A | 3.338    |
| C44  | H53C | 2.750    | C45  | H28B | 3.255    |
| C45  | H44B | 3.558    | C45  | H50A | 3.346    |
| C45  | H50B | 2.831    | C45  | H50C | 2.831    |
| C45  | H53A | 3.376    | C45  | H53B | 2.871    |
| C45  | H53C | 2.871    | C46  | H44A | 2.833    |
| C46  | H44B | 3.202    | C46  | H52A | 2.654    |
| C46  | H52B | 3.227    | C46  | H52C | 3.186    |
| C46  | H54A | 2.686    | C46  | H54B | 3.173    |
| C46  | H54C | 3.263    | C47  | H43A | 2.883    |
| C47  | H43C | 3.566    | C47  | H44A | 3.191    |
| C47  | H51A | 2.655    | C47  | H51B | 3.227    |
| C47  | H51C | 3.170    | C47  | H53A | 2.688    |
| C47  | H53B | 3.175    | C47  | H53C | 3.264    |
| C48  | H38A | 3.387    | C48  | H43A | 3.052    |
| C48  | H43C | 3.067    | C48  | H50A | 2.715    |
| C48  | H50B | 3.256    | C48  | H50C | 3.211    |
| C48  | H52A | 3.376    | C48  | H52B | 2.880    |
| C48  | H52C | 2.880    | C49  | H38A | 3.190    |



Table S13-10. Intramolecular contacts less than 3.60 Å involving hydrogens (continued)

| atom | atom | distance | atom | atom | distance |
|------|------|----------|------|------|----------|
| C49  | H51A | 3.375    | C49  | H51B | 2.873    |
| C49  | H51C | 2.873    | C49  | H54A | 3.347    |
| C49  | H54B | 2.834    | C49  | H54C | 2.834    |
| C50  | H38A | 2.853    | C50  | H38C | 3.293    |
| C50  | H51B | 3.207    | C50  | H51C | 3.214    |
| C50  | H54B | 3.087    | C50  | H54C | 3.043    |
| C51  | H38A | 3.327    | C51  | H43A | 3.157    |
| C51  | H43C | 2.863    | C51  | H50A | 2.828    |
| C51  | H52B | 3.169    | C51  | H52C | 3.159    |
| C52  | H43A | 2.786    | C52  | H44A | 3.422    |
| C52  | H51A | 2.753    | C52  | H53A | 2.741    |
| C53  | H16C | 3.536    | C53  | H44A | 2.725    |
| C53  | H44B | 3.161    | C53  | H52A | 2.727    |
| C53  | H54A | 2.775    | C54  | H13C | 3.335    |
| C54  | H28B | 2.681    | C54  | H50B | 3.086    |
| C54  | H50C | 3.042    | C54  | H53B | 3.164    |
| C54  | H53C | 3.169    | C55  | H1A  | 2.758    |
| C55  | H1B  | 2.485    | C55  | H28A | 2.482    |
| C55  | H28B | 3.232    | C55  | H30  | 2.856    |
| C55  | H57  | 2.683    | C55  | H71B | 3.024    |
| C55  | H78A | 3.401    | C55  | H78C | 3.076    |
| C55  | H26A | 3.42(3)  | C55  | H26B | 3.24(3)  |
| C56  | H1B  | 2.693    | C56  | H30  | 3.278    |
| C56  | H78C | 3.265    | C56  | H26A | 2.93(3)  |
| C56  | H26B | 3.41(3)  | C57  | H1B  | 2.777    |
| C57  | H3   | 3.560    | C57  | H30  | 3.165    |
| C57  | H40A | 3.314    | C57  | H55A | 3.223    |
| C57  | H55B | 3.085    | C57  | H59  | 3.238    |
| C57  | H67C | 3.511    | C57  | H68B | 3.573    |
| C57  | H69A | 2.762    | C57  | H69C | 2.817    |
| C57  | H26A | 3.28(3)  | C58  | H67A | 2.657    |
| C58  | H67B | 3.350    | C58  | H67C | 2.704    |
| C58  | H68A | 2.671    | C58  | H68B | 2.723    |
| C58  | H68C | 3.360    | C58  | H69A | 2.731    |
| C58  | H69B | 3.382    | C58  | H69C | 2.750    |
| C59  | H57  | 3.245    | C59  | H63B | 3.506    |
| C59  | H64B | 2.768    | C59  | H64C | 2.749    |

Table S13-10. Intramolecular contacts less than 3.60 Å involving hydrogens (continued)

| atom | atom | distance | atom | atom | distance |
|------|------|----------|------|------|----------|
| C59  | H65C | 3.545    | C59  | H67A | 2.754    |
| C59  | H67C | 3.378    | C59  | H68A | 2.708    |
| C59  | H68B | 3.312    | C60  | H63A | 2.676    |
| C60  | H63B | 2.699    | C60  | H63C | 3.356    |
| C60  | H64A | 3.394    | C60  | H64B | 2.751    |
| C60  | H64C | 2.751    | C60  | H65A | 2.699    |
| C60  | H65B | 3.377    | C60  | H65C | 2.745    |
| C60  | H26A | 3.38(3)  | C61  | H55A | 2.646    |
| C61  | H55B | 2.840    | C61  | H57  | 3.265    |
| C61  | H59  | 3.249    | C61  | H63A | 2.750    |
| C61  | H63B | 3.308    | C61  | H65A | 2.873    |
| C61  | H65C | 3.485    | C61  | H78C | 3.420    |
| C61  | H81B | 3.548    | C61  | H26A | 3.03(3)  |
| C61  | H26B | 3.49(3)  | C61  | H26C | 3.58(4)  |
| C62  | H59  | 2.684    | C63  | H64A | 2.654    |
| C63  | H64B | 2.642    | C63  | H64C | 3.332    |
| C63  | H65A | 2.749    | C63  | H65B | 2.696    |
| C63  | H65C | 3.378    | C63  | H70B | 3.304    |
| C63  | H70C | 3.343    | C63  | H26C | 3.15(5)  |
| C64  | H59  | 2.438    | C64  | H63A | 3.331    |
| C64  | H63B | 2.649    | C64  | H63C | 2.649    |
| C64  | H65A | 3.347    | C64  | H65B | 2.673    |
| C64  | H65C | 2.673    | C65  | H63A | 2.743    |
| C65  | H63B | 3.379    | C65  | H63C | 2.701    |
| C65  | H64A | 2.656    | C65  | H64B | 3.348    |
| C65  | H64C | 2.687    | C65  | H70C | 3.214    |
| C65  | H81A | 3.459    | C65  | H81B | 3.046    |
| C66  | H57  | 2.727    | C66  | H59  | 2.670    |
| C67  | H59  | 2.927    | C67  | H68A | 2.701    |
| C67  | H68B | 3.353    | C67  | H68C | 2.670    |
| C67  | H69A | 2.675    | C67  | H69B | 2.646    |
| C67  | H69C | 3.334    | C68  | H59  | 2.826    |
| C68  | H67A | 2.703    | C68  | H67B | 2.669    |
| C68  | H67C | 3.353    | C68  | H69A | 3.331    |
| C68  | H69B | 2.655    | C68  | H69C | 2.655    |
| C69  | H14A | 3.163    | C69  | H14B | 3.269    |
| C69  | H57  | 2.504    | C69  | H67A | 3.330    |

Table S13-10. Intramolecular contacts less than 3.60 Å involving hydrogens (continued)

| atom | atom | distance | atom | atom | distance |
|------|------|----------|------|------|----------|
| C69  | H67B | 2.666    | C69  | H67C | 2.666    |
| C69  | H68A | 3.327    | C69  | H68B | 2.660    |
| C69  | H68C | 2.660    | C70  | H63A | 2.844    |
| C70  | H65A | 3.176    | C70  | H71A | 3.384    |
| C70  | H71C | 3.084    | C70  | H79B | 3.052    |
| C70  | H80A | 3.527    | C70  | H80C | 2.583    |
| C71  | H55A | 2.819    | C71  | H70A | 3.373    |
| C71  | H70B | 3.093    | C71  | H77A | 3.192    |
| C71  | H77C | 2.818    | C71  | H79A | 3.479    |
| C71  | H79B | 3.444    | C71  | H26B | 3.50(3)  |
| C72  | H55B | 3.214    | C72  | H77A | 3.377    |
| C72  | H77B | 2.875    | C72  | H77C | 2.876    |
| C72  | H81A | 3.359    | C72  | H81B | 2.845    |
| C72  | H81C | 2.845    | C73  | H65A | 3.333    |
| C73  | H78A | 3.363    | C73  | H78B | 2.840    |
| C73  | H78C | 2.840    | C73  | H80A | 2.662    |
| C73  | H80B | 3.168    | C73  | H80C | 3.241    |
| C74  | H70A | 2.879    | C74  | H70C | 3.111    |
| C74  | H79A | 3.361    | C74  | H79B | 2.849    |
| C74  | H79C | 2.849    | C74  | H81A | 2.687    |
| C74  | H81B | 3.242    | C74  | H81C | 3.185    |
| C75  | H70A | 2.996    | C75  | H71A | 2.972    |
| C75  | H77A | 2.693    | C75  | H77B | 3.204    |
| C75  | H77C | 3.258    | C75  | H80A | 3.374    |
| C75  | H80B | 2.870    | C75  | H80C | 2.870    |
| C76  | H71A | 2.926    | C76  | H71B | 3.141    |
| C76  | H78A | 2.695    | C76  | H78B | 3.177    |
| C76  | H78C | 3.265    | C76  | H79A | 2.696    |
| C76  | H79B | 3.238    | C76  | H79C | 3.228    |
| C77  | H71A | 2.902    | C77  | H71B | 2.959    |
| C77  | H78A | 2.798    | C77  | H79A | 2.796    |
| C78  | H41A | 3.101    | C78  | H55B | 2.659    |
| C78  | H77B | 3.168    | C78  | H77C | 3.208    |
| C78  | H81B | 3.103    | C78  | H81C | 3.067    |
| C79  | H70A | 3.009    | C79  | H71A | 2.950    |
| C79  | H77A | 2.795    | C79  | H80B | 3.176    |
| C79  | H80C | 3.117    | C80  | H70A | 2.852    |

Table S13-10. Intramolecular contacts less than 3.60 Å involving hydrogens (continued)

| atom | atom | distance | atom | atom | distance |
|------|------|----------|------|------|----------|
| C80  | H70C | 2.972    | C80  | H79B | 3.170    |
| C80  | H79C | 3.112    | C80  | H81A | 2.758    |
| C81  | H65A | 2.947    | C81  | H65C | 3.499    |
| C81  | H78B | 3.102    | C81  | H78C | 3.067    |
| C81  | H80A | 2.749    | H1A  | H3   | 3.456    |
| H1A  | H16B | 2.228    | H1A  | H16C | 3.196    |
| H1A  | H27B | 3.482    | H1A  | H28A | 2.563    |
| H1A  | H28B | 2.457    | H1A  | H44B | 3.152    |
| H1A  | H55A | 2.520    | H1A  | H55B | 3.527    |
| H1A  | H26A | 3.350    | H1A  | H26B | 2.812    |
| H1B  | H3   | 3.181    | H1B  | H16B | 3.346    |
| H1B  | H27B | 2.349    | H1B  | H27C | 3.439    |
| H1B  | H28A | 3.555    | H1B  | H28B | 3.410    |
| H1B  | H55A | 2.522    | H1B  | H55B | 3.445    |
| H1B  | H57  | 2.632    | H1B  | H26A | 2.254    |
| H1B  | H26B | 2.539    | H1B  | H26C | 3.550    |
| H3   | H13A | 2.360    | H3   | H13C | 3.424    |
| H3   | H14A | 2.181    | H3   | H14B | 3.216    |
| H3   | H14C | 3.588    | H3   | H28B | 2.672    |
| H3   | H30  | 2.561    | H3   | H40B | 3.541    |
| H3   | H54C | 3.154    | H3   | H57  | 2.663    |
| H3   | H69A | 3.448    | H3   | H69C | 3.381    |
| H5   | H9C  | 3.505    | H5   | H11A | 3.389    |
| H5   | H11B | 2.133    | H5   | H11C | 2.272    |
| H5   | H15A | 2.331    | H5   | H15B | 2.258    |
| H5   | H15C | 3.486    | H9A  | H10A | 2.545    |
| H9A  | H10C | 3.013    | H9A  | H11A | 2.454    |
| H9A  | H11B | 2.918    | H9A  | H11C | 3.553    |
| H9A  | H17B | 3.511    | H9A  | H17C | 3.341    |
| H9B  | H10A | 3.029    | H9B  | H10C | 2.580    |
| H9B  | H11A | 3.555    | H9B  | H11B | 3.568    |
| H9B  | H17B | 2.559    | H9B  | H17C | 2.789    |
| H9B  | H53B | 3.460    | H9B  | H54A | 3.315    |
| H9C  | H11A | 2.967    | H9C  | H11B | 2.485    |
| H9C  | H11C | 3.576    | H9C  | H53B | 3.375    |
| H9C  | H54A | 2.998    | H9C  | H54B | 3.423    |
| H10A | H11A | 2.416    | H10A | H11B | 3.528    |

Table S13-10. Intramolecular contacts less than 3.60 Å involving hydrogens (continued)

| atom | atom | distance | atom | atom | distance |
|------|------|----------|------|------|----------|
| H10A | H11C | 2.900    | H10A | H17C | 3.186    |
| H10A | H23A | 3.396    | H10A | H23C | 3.113    |
| H10B | H11A | 2.932    | H10B | H11B | 3.556    |
| H10B | H11C | 2.460    | H10B | H23A | 3.029    |
| H10B | H23C | 3.495    | H10B | H27A | 3.189    |
| H10C | H11A | 3.529    | H10C | H11C | 3.551    |
| H10C | H17B | 3.572    | H10C | H17C | 2.575    |
| H10C | H23A | 2.652    | H10C | H23C | 2.538    |
| H10C | H27A | 3.123    | H10C | H27B | 3.482    |
| H13A | H14A | 2.523    | H13A | H14B | 3.593    |
| H13A | H14C | 2.968    | H13A | H15B | 3.568    |
| H13A | H15C | 3.568    | H13A | H28B | 3.522    |
| H13A | H30  | 3.375    | H13A | H50B | 3.377    |
| H13A | H54C | 2.957    | H13B | H14A | 2.959    |
| H13B | H14B | 3.559    | H13B | H14C | 2.466    |
| H13B | H15A | 3.570    | H13B | H15B | 2.956    |
| H13B | H15C | 2.485    | H13C | H14A | 3.594    |
| H13C | H14C | 3.562    | H13C | H15A | 3.570    |
| H13C | H15B | 2.485    | H13C | H15C | 2.956    |
| H13C | H50B | 3.276    | H13C | H50C | 3.150    |
| H13C | H54B | 2.893    | H13C | H54C | 2.871    |
| H14A | H15A | 3.570    | H14A | H15C | 3.552    |
| H14A | H30  | 3.347    | H14A | H40B | 2.657    |
| H14A | H57  | 3.379    | H14A | H69A | 2.562    |
| H14A | H69B | 3.420    | H14A | H69C | 3.049    |
| H14B | H15A | 2.486    | H14B | H15B | 3.569    |
| H14B | H15C | 2.929    | H14B | H69A | 3.083    |
| H14B | H69B | 3.142    | H14B | H69C | 3.029    |
| H14C | H15A | 2.963    | H14C | H15B | 3.558    |
| H14C | H15C | 2.461    | H14C | H40B | 3.501    |
| H16A | H17A | 3.308    | H16A | H17B | 3.447    |
| H16A | H25A | 2.622    | H16A | H25B | 1.945    |
| H16A | H25C | 3.417    | H16A | H26B | 3.336    |
| H16B | H25A | 3.190    | H16B | H25B | 3.239    |
| H16B | H44B | 2.887    | H16B | H55A | 3.373    |
| H16B | H71B | 3.327    | H16B | H71C | 3.527    |
| H16B | H26B | 2.574    | H16C | H17A | 3.396    |

Table S13-10. Intramolecular contacts less than 3.60 Å involving hydrogens (continued)

| atom | atom | distance | atom | atom | distance |
|------|------|----------|------|------|----------|
| H16C | H17B | 2.766    | H16C | H25B | 3.504    |
| H16C | H44A | 3.502    | H16C | H44B | 3.041    |
| H16C | H53C | 2.647    | H17A | H23C | 3.233    |
| H17A | H24A | 2.643    | H17A | H24B | 3.452    |
| H17A | H24C | 1.990    | H17B | H24C | 3.554    |
| H17C | H23C | 2.400    | H17C | H24A | 3.177    |
| H17C | H24C | 3.258    | H23A | H27A | 2.104    |
| H23A | H27B | 3.438    | H23A | H27C | 3.404    |
| H23B | H24A | 2.549    | H23B | H24B | 3.496    |
| H23B | H27A | 3.394    | H23C | H24A | 2.545    |
| H23C | H27A | 3.436    | H24B | H25B | 3.247    |
| H24B | H25C | 2.814    | H24C | H25B | 2.814    |
| H24C | H25C | 3.227    | H25A | H71C | 3.254    |
| H25A | H26B | 2.535    | H25A | H26C | 2.503    |
| H25C | H26C | 3.449    | H27B | H68B | 3.450    |
| H27B | H69C | 3.533    | H27B | H26A | 2.751    |
| H27C | H68B | 2.846    | H27C | H26A | 2.676    |
| H28A | H30  | 3.437    | H28A | H44B | 2.309    |
| H28A | H44C | 3.032    | H28A | H54C | 3.449    |
| H28A | H55A | 2.492    | H28A | H55B | 2.449    |
| H28A | H71B | 3.086    | H28A | H77C | 3.005    |
| H28B | H30  | 3.247    | H28B | H44B | 2.903    |
| H28B | H54A | 2.746    | H28B | H54B | 3.513    |
| H28B | H54C | 1.965    | H28B | H55A | 3.491    |
| H28B | H55B | 3.421    | H30  | H40A | 2.171    |
| H30  | H40B | 2.327    | H30  | H40C | 3.436    |
| H30  | H41A | 3.551    | H30  | H55B | 2.622    |
| H30  | H57  | 2.649    | H30  | H78A | 3.565    |
| H30  | H78C | 3.390    | H32  | H37A | 2.170    |
| H32  | H37B | 3.403    | H32  | H37C | 2.254    |
| H32  | H38C | 3.583    | H32  | H41A | 3.392    |
| H32  | H41C | 2.410    | H32  | H42A | 3.257    |
| H32  | H42B | 2.289    | H36A | H37B | 3.552    |
| H36A | H37C | 3.552    | H36A | H38A | 2.580    |
| H36A | H38B | 3.000    | H36A | H43B | 2.489    |
| H36A | H43C | 2.600    | H36A | H77B | 3.145    |
| H36B | H37A | 3.554    | H36B | H37B | 2.934    |

Table S13-10. Intramolecular contacts less than 3.60 Å involving hydrogens (continued)

| atom | atom | distance | atom | atom | distance |
|------|------|----------|------|------|----------|
| H36B | H37C | 2.459    | H36B | H38B | 3.583    |
| H36B | H77B | 2.788    | H36B | H78A | 3.466    |
| H36C | H37A | 3.554    | H36C | H37B | 2.459    |
| H36C | H37C | 2.934    | H36C | H38A | 2.999    |
| H36C | H38B | 2.495    | H36C | H38C | 3.581    |
| H36C | H43B | 3.416    | H36C | H43C | 3.141    |
| H37A | H38A | 3.558    | H37A | H38B | 2.944    |
| H37A | H38C | 2.467    | H37B | H38A | 3.548    |
| H37B | H38B | 2.453    | H37B | H38C | 2.925    |
| H37C | H38B | 3.554    | H37C | H38C | 3.560    |
| H38A | H43C | 2.652    | H38A | H50A | 2.486    |
| H38A | H50B | 2.624    | H38A | H51B | 2.548    |
| H38B | H43C | 3.184    | H38B | H50A | 3.523    |
| H38B | H51B | 3.091    | H38C | H50A | 2.764    |
| H38C | H50B | 2.936    | H40A | H41A | 2.482    |
| H40A | H41B | 2.913    | H40A | H41C | 3.564    |
| H40A | H42A | 3.571    | H40A | H42C | 3.529    |
| H40A | H57  | 3.111    | H40A | H67C | 3.396    |
| H40A | H69A | 3.186    | H40A | H78C | 3.399    |
| H40B | H41A | 3.566    | H40B | H41B | 3.518    |
| H40B | H42A | 2.495    | H40B | H42B | 3.568    |
| H40B | H42C | 2.897    | H40B | H57  | 3.419    |
| H40B | H69A | 2.826    | H40C | H41A | 2.925    |
| H40C | H41B | 2.401    | H40C | H41C | 3.518    |
| H40C | H42A | 2.979    | H40C | H42B | 3.542    |
| H40C | H42C | 2.435    | H40C | H67C | 3.469    |
| H40C | H69A | 3.567    | H41A | H42B | 3.564    |
| H41A | H42C | 3.564    | H41A | H78A | 3.349    |
| H41A | H78B | 2.661    | H41A | H78C | 2.822    |
| H41B | H42A | 3.571    | H41B | H42B | 2.956    |
| H41B | H42C | 2.486    | H41C | H42A | 3.571    |
| H41C | H42B | 2.486    | H41C | H42C | 2.956    |
| H41C | H78B | 3.535    | H43A | H44A | 3.355    |
| H43A | H44C | 3.419    | H43A | H51A | 2.833    |
| H43A | H51B | 3.101    | H43A | H52A | 3.351    |
| H43A | H52B | 2.019    | H43A | H52C | 3.462    |
| H43B | H44A | 3.501    | H43B | H44C | 2.806    |

Table S13-10. Intramolecular contacts less than 3.60 Å involving hydrogens (continued)

| atom | atom | distance | atom | atom | distance |
|------|------|----------|------|------|----------|
| H43B | H52B | 3.539    | H43C | H51A | 2.906    |
| H43C | H51B | 2.322    | H43C | H52B | 3.364    |
| H44A | H52A | 3.091    | H44A | H52B | 3.417    |
| H44A | H53A | 2.614    | H44A | H53C | 2.403    |
| H44B | H53A | 3.493    | H44B | H53C | 2.466    |
| H44B | H71B | 3.499    | H44C | H71B | 3.446    |
| H44C | H77A | 3.587    | H44C | H77C | 3.076    |
| H50A | H51B | 2.641    | H50A | H51C | 2.699    |
| H50B | H54B | 3.211    | H50B | H54C | 2.715    |
| H50C | H54B | 2.715    | H50C | H54C | 3.090    |
| H51A | H52B | 2.581    | H51A | H52C | 2.616    |
| H51C | H52C | 3.550    | H52A | H53A | 2.055    |
| H52A | H53B | 3.320    | H52A | H53C | 3.417    |
| H52B | H53A | 3.422    | H52C | H53A | 3.339    |
| H53B | H54A | 2.653    | H53B | H54B | 3.509    |
| H53C | H54A | 2.576    | H55A | H57  | 3.469    |
| H55A | H71B | 2.189    | H55A | H71C | 3.041    |
| H55A | H77C | 3.449    | H55A | H26A | 3.095    |
| H55A | H26B | 2.516    | H55B | H57  | 3.223    |
| H55B | H71B | 3.034    | H55B | H77C | 3.140    |
| H55B | H78A | 2.413    | H55B | H78B | 3.560    |
| H55B | H78C | 2.229    | H57  | H69A | 2.242    |
| H57  | H69B | 3.471    | H57  | H69C | 2.314    |
| H59  | H64A | 3.404    | H59  | H64B | 2.269    |
| H59  | H64C | 2.165    | H59  | H65C | 3.595    |
| H59  | H67A | 2.363    | H59  | H67C | 3.416    |
| H59  | H68A | 2.237    | H59  | H68B | 3.272    |
| H63A | H64A | 3.553    | H63A | H64B | 3.544    |
| H63A | H65A | 2.596    | H63A | H65B | 2.998    |
| H63A | H70B | 2.462    | H63A | H70C | 2.719    |
| H63A | H26A | 3.515    | H63A | H26C | 2.825    |
| H63B | H64A | 2.933    | H63B | H64B | 2.441    |
| H63B | H64C | 3.547    | H63B | H65B | 3.584    |
| H63B | H26A | 3.156    | H63B | H26C | 2.587    |
| H63C | H64A | 2.454    | H63C | H64B | 2.915    |
| H63C | H64C | 3.552    | H63C | H65A | 3.013    |
| H63C | H65B | 2.494    | H63C | H65C | 3.584    |



Table S13-10. Intramolecular contacts less than 3.60 Å involving hydrogens (continued)

| atom | atom | distance | atom | atom | distance |
|------|------|----------|------|------|----------|
| H63C | H70B | 3.337    | H63C | H70C | 3.232    |
| H64A | H65A | 3.557    | H64A | H65B | 2.462    |
| H64A | H65C | 2.928    | H64B | H65B | 3.563    |
| H64B | H65C | 3.578    | H64B | H68A | 3.561    |
| H64C | H65A | 3.581    | H64C | H65B | 2.973    |
| H64C | H65C | 2.495    | H65A | H70C | 2.566    |
| H65A | H81A | 2.829    | H65A | H81B | 2.430    |
| H65B | H70C | 3.090    | H65C | H81A | 3.323    |
| H65C | H81B | 2.798    | H67A | H68A | 2.533    |
| H67A | H68C | 2.969    | H67A | H69A | 3.566    |
| H67A | H69B | 3.545    | H67B | H68A | 2.964    |
| H67B | H68B | 3.561    | H67B | H68C | 2.463    |
| H67B | H69A | 2.966    | H67B | H69B | 2.457    |
| H67B | H69C | 3.557    | H67C | H68C | 3.561    |
| H67C | H69A | 2.488    | H67C | H69B | 2.924    |
| H67C | H69C | 3.570    | H68A | H69B | 3.550    |
| H68A | H69C | 3.550    | H68B | H69A | 3.559    |
| H68B | H69B | 2.939    | H68B | H69C | 2.464    |
| H68C | H69A | 3.559    | H68C | H69B | 2.464    |
| H68C | H69C | 2.938    | H70A | H71A | 3.325    |
| H70A | H71C | 3.398    | H70A | H79B | 2.275    |
| H70A | H79C | 3.573    | H70A | H80A | 3.420    |
| H70A | H80B | 3.535    | H70A | H80C | 2.115    |
| H70B | H71A | 3.424    | H70B | H71C | 2.729    |
| H70B | H79B | 3.589    | H70B | H80C | 3.489    |
| H70C | H80A | 3.069    | H70C | H80C | 2.408    |
| H71A | H77A | 2.631    | H71A | H77C | 2.754    |
| H71A | H79A | 2.662    | H71A | H79B | 2.809    |
| H71B | H77A | 3.117    | H71B | H77C | 2.325    |
| H71B | H26B | 3.299    | H71C | H26B | 2.942    |
| H71C | H26C | 3.589    | H77A | H79A | 2.127    |
| H77A | H79B | 3.457    | H77A | H79C | 3.419    |
| H77B | H78A | 2.644    | H77B | H78B | 3.541    |
| H77B | H79A | 3.413    | H77C | H78A | 2.636    |
| H77C | H79A | 3.464    | H78B | H81B | 3.220    |
| H78B | H81C | 2.737    | H78C | H81B | 2.738    |
| H78C | H81C | 3.121    | H79B | H80B | 3.315    |

Table S13-10. Intramolecular contacts less than 3.60 Å involving hydrogens (continued)

| atom | atom | distance | atom | atom | distance |
|------|------|----------|------|------|----------|
| H79B | H80C | 2.812    | H79C | H80B | 2.812    |
| H79C | H80C | 3.151    | H80A | H81A | 2.080    |
| H80A | H81B | 3.437    | H80A | H81C | 3.344    |
| H80B | H81A | 3.354    | H80C | H81A | 3.442    |

Table S13-11. Intermolecular contacts less than 3.60 Å involving hydrogens

| atom | atom               | distance | atom | atom               | distance |
|------|--------------------|----------|------|--------------------|----------|
| C8   | H14C <sup>1</sup>  | 3.480    | C9   | H14C <sup>1</sup>  | 3.271    |
| C9   | H52A <sup>2</sup>  | 3.302    | C9   | H52C <sup>2</sup>  | 3.405    |
| C10  | H13B <sup>1</sup>  | 3.432    | C10  | H14C <sup>1</sup>  | 3.285    |
| C10  | H15C <sup>1</sup>  | 3.346    | C10  | H36C <sup>3</sup>  | 3.346    |
| C10  | H38B <sup>3</sup>  | 3.304    | C11  | H14C <sup>1</sup>  | 3.279    |
| C11  | H42A <sup>1</sup>  | 3.414    | C11  | H64A <sup>4</sup>  | 3.210    |
| C11  | H65B <sup>4</sup>  | 3.520    | C12  | H10A <sup>5</sup>  | 3.569    |
| C13  | H10A <sup>5</sup>  | 3.389    | C13  | H37B <sup>6</sup>  | 3.335    |
| C14  | H9A <sup>5</sup>   | 3.208    | C14  | H10A <sup>5</sup>  | 3.312    |
| C14  | H11A <sup>5</sup>  | 3.287    | C14  | H52B <sup>3</sup>  | 3.188    |
| C15  | H10A <sup>5</sup>  | 3.390    | C15  | H17C <sup>5</sup>  | 3.449    |
| C15  | H51A <sup>3</sup>  | 3.331    | C15  | H63C <sup>4</sup>  | 3.236    |
| C15  | H64A <sup>4</sup>  | 3.465    | C16  | H81C <sup>7</sup>  | 3.394    |
| C17  | H52C <sup>2</sup>  | 3.137    | C17  | H79C <sup>7</sup>  | 3.366    |
| C17  | H80B <sup>7</sup>  | 2.945    | C18  | H24B <sup>8</sup>  | 3.244    |
| C19  | H23B <sup>8</sup>  | 3.367    | C19  | H24B <sup>8</sup>  | 3.536    |
| C20  | H23B <sup>8</sup>  | 3.467    | C23  | H25C <sup>8</sup>  | 3.363    |
| C23  | H36C <sup>3</sup>  | 3.126    | C23  | H37B <sup>3</sup>  | 3.476    |
| C23  | H63B <sup>8</sup>  | 3.314    | C23  | H26C <sup>8</sup>  | 3.29(5)  |
| C24  | H27C <sup>8</sup>  | 3.078    | C24  | H63B <sup>8</sup>  | 3.352    |
| C24  | H79A <sup>7</sup>  | 3.532    | C24  | H79C <sup>7</sup>  | 3.212    |
| C25  | H23B <sup>8</sup>  | 3.369    | C25  | H36B <sup>7</sup>  | 3.137    |
| C25  | H77B <sup>7</sup>  | 3.074    | C26  | H23B <sup>8</sup>  | 3.113    |
| C26  | H24B <sup>8</sup>  | 3.587    | C27  | H24B <sup>8</sup>  | 2.964    |
| C27  | H25C <sup>8</sup>  | 3.388    | C27  | H36C <sup>3</sup>  | 3.301    |
| C36  | H10B <sup>9</sup>  | 3.457    | C36  | H23A <sup>9</sup>  | 2.921    |
| C36  | H25C <sup>10</sup> | 3.262    | C36  | H27A <sup>9</sup>  | 2.950    |
| C37  | H13B <sup>6</sup>  | 3.483    | C37  | H23A <sup>9</sup>  | 3.547    |
| C37  | H50C <sup>6</sup>  | 3.503    | C37  | H70B <sup>10</sup> | 3.442    |
| C38  | H10B <sup>9</sup>  | 3.436    | C40  | H64C <sup>11</sup> | 3.323    |
| C40  | H67A <sup>11</sup> | 3.196    | C41  | H67A <sup>11</sup> | 3.463    |
| C41  | H71A <sup>10</sup> | 3.268    | C41  | H79A <sup>10</sup> | 3.573    |
| C41  | H79B <sup>10</sup> | 3.269    | C42  | H11C <sup>5</sup>  | 3.535    |
| C42  | H50A <sup>6</sup>  | 3.303    | C42  | H51B <sup>6</sup>  | 3.365    |
| C42  | H51C <sup>6</sup>  | 3.098    | C43  | H69C <sup>9</sup>  | 3.484    |
| C44  | H68C <sup>9</sup>  | 3.509    | C45  | H80C <sup>4</sup>  | 3.319    |
| C46  | H80A <sup>4</sup>  | 3.597    | C46  | H80C <sup>4</sup>  | 3.526    |

Table S13-11. Intermolecular contacts less than 3.60 Å involving hydrogens (continued)

| atom | atom               | distance | atom | atom               | distance |
|------|--------------------|----------|------|--------------------|----------|
| C47  | H80B <sup>4</sup>  | 3.268    | C47  | H80C <sup>4</sup>  | 3.344    |
| C48  | H80B <sup>4</sup>  | 3.428    | C48  | H80C <sup>4</sup>  | 3.021    |
| C49  | H80C <sup>4</sup>  | 3.009    | C50  | H37A <sup>6</sup>  | 3.089    |
| C50  | H42B <sup>6</sup>  | 3.344    | C50  | H70A <sup>4</sup>  | 3.256    |
| C50  | H80C <sup>4</sup>  | 3.550    | C51  | H11C <sup>9</sup>  | 3.445    |
| C51  | H15A <sup>9</sup>  | 3.327    | C51  | H42B <sup>6</sup>  | 3.337    |
| C51  | H42C <sup>6</sup>  | 3.341    | C51  | H80C <sup>4</sup>  | 3.555    |
| C52  | H9A <sup>2</sup>   | 3.099    | C52  | H14B <sup>9</sup>  | 3.191    |
| C52  | H15A <sup>9</sup>  | 3.458    | C52  | H17B <sup>2</sup>  | 3.435    |
| C52  | H80B <sup>4</sup>  | 3.492    | C53  | H53B <sup>2</sup>  | 3.569    |
| C63  | H15B <sup>12</sup> | 3.230    | C63  | H23B <sup>8</sup>  | 3.373    |
| C63  | H24A <sup>8</sup>  | 3.372    | C64  | H11B <sup>12</sup> | 3.121    |
| C64  | H15B <sup>12</sup> | 3.527    | C64  | H40C <sup>11</sup> | 3.369    |
| C64  | H42C <sup>11</sup> | 3.348    | C65  | H11B <sup>12</sup> | 3.176    |
| C67  | H67C <sup>11</sup> | 3.475    | C68  | H44C <sup>3</sup>  | 3.490    |
| C68  | H77A <sup>3</sup>  | 2.917    | C68  | H79A <sup>3</sup>  | 3.476    |
| C69  | H43A <sup>3</sup>  | 3.597    | C69  | H43B <sup>3</sup>  | 3.578    |
| C70  | H50C <sup>12</sup> | 2.935    | C71  | H41C <sup>7</sup>  | 3.399    |
| C72  | H16A <sup>10</sup> | 3.413    | C72  | H25B <sup>10</sup> | 3.115    |
| C73  | H16A <sup>10</sup> | 3.296    | C74  | H17A <sup>10</sup> | 3.525    |
| C75  | H17A <sup>10</sup> | 3.389    | C75  | H24C <sup>10</sup> | 3.087    |
| C76  | H24C <sup>10</sup> | 3.426    | C76  | H25B <sup>10</sup> | 3.044    |
| C77  | H24C <sup>10</sup> | 3.562    | C77  | H25B <sup>10</sup> | 3.269    |
| C77  | H25C <sup>10</sup> | 3.526    | C77  | H68B <sup>9</sup>  | 3.494    |
| C78  | H25B <sup>10</sup> | 3.350    | C79  | H17A <sup>10</sup> | 3.272    |
| C79  | H24C <sup>10</sup> | 2.855    | C79  | H41B <sup>7</sup>  | 3.234    |
| C79  | H51C <sup>12</sup> | 3.431    | C80  | H17A <sup>10</sup> | 3.496    |
| C80  | H17B <sup>10</sup> | 3.248    | C81  | H16C <sup>10</sup> | 3.535    |
| H5   | H51A <sup>3</sup>  | 3.376    | H5   | H64A <sup>4</sup>  | 2.929    |
| H5   | H65B <sup>4</sup>  | 3.422    | H9A  | C14 <sup>1</sup>   | 3.208    |
| H9A  | C52 <sup>2</sup>   | 3.099    | H9A  | H14B <sup>1</sup>  | 3.166    |
| H9A  | H14C <sup>1</sup>  | 2.419    | H9A  | H15C <sup>1</sup>  | 3.434    |
| H9A  | H52A <sup>2</sup>  | 2.795    | H9A  | H52B <sup>2</sup>  | 3.121    |
| H9A  | H52C <sup>2</sup>  | 2.864    | H9B  | H52A <sup>2</sup>  | 3.276    |
| H9B  | H52C <sup>2</sup>  | 3.097    | H9C  | H52A <sup>2</sup>  | 3.309    |
| H9C  | H65B <sup>4</sup>  | 3.185    | H10A | C12 <sup>1</sup>   | 3.569    |
| H10A | C13 <sup>1</sup>   | 3.389    | H10A | C14 <sup>1</sup>   | 3.312    |

Table S13-11. Intermolecular contacts less than 3.60 Å involving hydrogens (continued)

| atom | atom              | distance | atom | atom              | distance |
|------|-------------------|----------|------|-------------------|----------|
| H10A | C15 <sup>1</sup>  | 3.390    | H10A | H13B <sup>1</sup> | 2.540    |
| H10A | H14C <sup>1</sup> | 2.438    | H10A | H15C <sup>1</sup> | 2.542    |
| H10A | H37B <sup>3</sup> | 3.560    | H10A | H38B <sup>3</sup> | 3.179    |
| H10B | C36 <sup>3</sup>  | 3.457    | H10B | C38 <sup>3</sup>  | 3.436    |
| H10B | H13B <sup>1</sup> | 3.553    | H10B | H36C <sup>3</sup> | 2.596    |
| H10B | H37B <sup>3</sup> | 3.545    | H10B | H38B <sup>3</sup> | 2.569    |
| H10B | H43C <sup>3</sup> | 3.187    | H10C | H15C <sup>1</sup> | 3.321    |
| H10C | H36C <sup>3</sup> | 3.376    | H11A | C14 <sup>1</sup>  | 3.287    |
| H11A | H14A <sup>1</sup> | 3.355    | H11A | H14C <sup>1</sup> | 2.428    |
| H11A | H40B <sup>1</sup> | 3.317    | H11A | H42A <sup>1</sup> | 2.945    |
| H11A | H42C <sup>1</sup> | 3.434    | H11B | C64 <sup>4</sup>  | 3.121    |
| H11B | C65 <sup>4</sup>  | 3.176    | H11B | H64A <sup>4</sup> | 2.462    |
| H11B | H64C <sup>4</sup> | 3.017    | H11B | H65B <sup>4</sup> | 2.559    |
| H11B | H65C <sup>4</sup> | 3.043    | H11C | C42 <sup>1</sup>  | 3.535    |
| H11C | C51 <sup>3</sup>  | 3.445    | H11C | H38B <sup>3</sup> | 3.400    |
| H11C | H42A <sup>1</sup> | 3.005    | H11C | H42C <sup>1</sup> | 3.179    |
| H11C | H43C <sup>3</sup> | 3.581    | H11C | H51A <sup>3</sup> | 3.362    |
| H11C | H51B <sup>3</sup> | 2.816    | H11C | H64A <sup>4</sup> | 3.172    |
| H13B | C10 <sup>5</sup>  | 3.432    | H13B | C37 <sup>6</sup>  | 3.483    |
| H13B | H10A <sup>5</sup> | 2.540    | H13B | H10B <sup>5</sup> | 3.553    |
| H13B | H37A <sup>6</sup> | 3.429    | H13B | H37B <sup>6</sup> | 2.717    |
| H13B | H38B <sup>6</sup> | 3.065    | H13C | H37A <sup>6</sup> | 3.348    |
| H13C | H37B <sup>6</sup> | 3.077    | H13C | H63C <sup>4</sup> | 3.424    |
| H14A | H11A <sup>5</sup> | 3.355    | H14B | C52 <sup>3</sup>  | 3.191    |
| H14B | H9A <sup>5</sup>  | 3.166    | H14B | H43A <sup>3</sup> | 2.758    |
| H14B | H52A <sup>3</sup> | 3.529    | H14B | H52B <sup>3</sup> | 2.320    |
| H14B | H52C <sup>3</sup> | 3.386    | H14C | C8 <sup>5</sup>   | 3.480    |
| H14C | C9 <sup>5</sup>   | 3.271    | H14C | C10 <sup>5</sup>  | 3.285    |
| H14C | C11 <sup>5</sup>  | 3.279    | H14C | H9A <sup>5</sup>  | 2.419    |
| H14C | H10A <sup>5</sup> | 2.438    | H14C | H11A <sup>5</sup> | 2.428    |
| H14C | H52B <sup>3</sup> | 3.312    | H15A | C51 <sup>3</sup>  | 3.327    |
| H15A | C52 <sup>3</sup>  | 3.458    | H15A | H17C <sup>5</sup> | 3.436    |
| H15A | H43A <sup>3</sup> | 3.550    | H15A | H51A <sup>3</sup> | 2.363    |
| H15A | H52B <sup>3</sup> | 2.945    | H15A | H52C <sup>3</sup> | 3.089    |
| H15A | H64A <sup>4</sup> | 3.352    | H15B | C63 <sup>4</sup>  | 3.230    |
| H15B | C64 <sup>4</sup>  | 3.527    | H15B | H63B <sup>4</sup> | 3.468    |
| H15B | H63C <sup>4</sup> | 2.328    | H15B | H64A <sup>4</sup> | 2.728    |

Table S13-11. Intermolecular contacts less than 3.60 Å involving hydrogens (continued)

| atom | atom              | distance | atom | atom              | distance |
|------|-------------------|----------|------|-------------------|----------|
| H15B | H65B <sup>4</sup> | 3.547    | H15C | C10 <sup>5</sup>  | 3.346    |
| H15C | H9A <sup>5</sup>  | 3.434    | H15C | H10A <sup>5</sup> | 2.542    |
| H15C | H10C <sup>5</sup> | 3.321    | H15C | H17C <sup>5</sup> | 2.673    |
| H15C | H23C <sup>5</sup> | 2.899    | H15C | H52C <sup>3</sup> | 3.517    |
| H15C | H63C <sup>4</sup> | 3.394    | H16A | C72 <sup>7</sup>  | 3.413    |
| H16A | C73 <sup>7</sup>  | 3.296    | H16A | H78B <sup>7</sup> | 3.196    |
| H16A | H81C <sup>7</sup> | 3.048    | H16C | C81 <sup>7</sup>  | 3.535    |
| H16C | H80B <sup>7</sup> | 3.553    | H16C | H81A <sup>7</sup> | 3.534    |
| H16C | H81C <sup>7</sup> | 2.984    | H17A | C74 <sup>7</sup>  | 3.525    |
| H17A | C75 <sup>7</sup>  | 3.389    | H17A | C79 <sup>7</sup>  | 3.272    |
| H17A | C80 <sup>7</sup>  | 3.496    | H17A | H52C <sup>2</sup> | 3.513    |
| H17A | H79C <sup>7</sup> | 2.467    | H17A | H80B <sup>7</sup> | 2.705    |
| H17B | C52 <sup>2</sup>  | 3.435    | H17B | C80 <sup>7</sup>  | 3.248    |
| H17B | H52C <sup>2</sup> | 2.522    | H17B | H79C <sup>7</sup> | 3.586    |
| H17B | H80A <sup>7</sup> | 3.574    | H17B | H80B <sup>7</sup> | 2.330    |
| H17C | C15 <sup>1</sup>  | 3.449    | H17C | H15A <sup>1</sup> | 3.436    |
| H17C | H15C <sup>1</sup> | 2.673    | H17C | H52C <sup>2</sup> | 2.963    |
| H17C | H80B <sup>7</sup> | 3.558    | H23A | C36 <sup>3</sup>  | 2.921    |
| H23A | C37 <sup>3</sup>  | 3.547    | H23A | H25C <sup>8</sup> | 3.015    |
| H23A | H36B <sup>3</sup> | 2.885    | H23A | H36C <sup>3</sup> | 2.156    |
| H23A | H37B <sup>3</sup> | 2.944    | H23A | H37C <sup>3</sup> | 3.513    |
| H23B | C19 <sup>8</sup>  | 3.367    | H23B | C20 <sup>8</sup>  | 3.467    |
| H23B | C25 <sup>8</sup>  | 3.369    | H23B | C26 <sup>8</sup>  | 3.113    |
| H23B | C63 <sup>8</sup>  | 3.373    | H23B | H25A <sup>8</sup> | 3.133    |
| H23B | H25C <sup>8</sup> | 3.056    | H23B | H36C <sup>3</sup> | 3.511    |
| H23B | H37B <sup>3</sup> | 3.503    | H23B | H63A <sup>8</sup> | 3.448    |
| H23B | H63B <sup>8</sup> | 2.677    | H23B | H63C <sup>8</sup> | 3.516    |
| H23B | H26C <sup>8</sup> | 2.332    | H23C | H15C <sup>1</sup> | 2.899    |
| H23C | H36C <sup>3</sup> | 3.536    | H23C | H37B <sup>3</sup> | 3.436    |
| H23C | H63B <sup>8</sup> | 3.078    | H23C | H63C <sup>8</sup> | 3.484    |
| H24A | C63 <sup>8</sup>  | 3.372    | H24A | H27C <sup>8</sup> | 3.526    |
| H24A | H63B <sup>8</sup> | 2.425    | H24A | H64B <sup>8</sup> | 3.003    |
| H24A | H79C <sup>7</sup> | 3.261    | H24A | H26A <sup>8</sup> | 3.558    |
| H24A | H26C <sup>8</sup> | 3.264    | H24B | C18 <sup>8</sup>  | 3.244    |
| H24B | C19 <sup>8</sup>  | 3.536    | H24B | C26 <sup>8</sup>  | 3.587    |
| H24B | C27 <sup>8</sup>  | 2.964    | H24B | H27A <sup>8</sup> | 3.425    |
| H24B | H27C <sup>8</sup> | 2.116    | H24B | H63B <sup>8</sup> | 3.553    |

Table S13-11. Intermolecular contacts less than 3.60 Å involving hydrogens (continued)

| atom | atom               | distance | atom | atom               | distance |
|------|--------------------|----------|------|--------------------|----------|
| H24B | H68B <sup>8</sup>  | 3.531    | H24B | H77A <sup>7</sup>  | 3.443    |
| H24B | H77B <sup>7</sup>  | 3.417    | H24B | H79A <sup>7</sup>  | 3.578    |
| H24B | H26A <sup>8</sup>  | 3.244    | H24B | H26C <sup>8</sup>  | 3.512    |
| H24C | C75 <sup>7</sup>   | 3.087    | H24C | C76 <sup>7</sup>   | 3.426    |
| H24C | C77 <sup>7</sup>   | 3.562    | H24C | C79 <sup>7</sup>   | 2.855    |
| H24C | H77A <sup>7</sup>  | 3.290    | H24C | H77B <sup>7</sup>  | 3.407    |
| H24C | H79A <sup>7</sup>  | 2.801    | H24C | H79C <sup>7</sup>  | 2.380    |
| H25A | H23B <sup>8</sup>  | 3.133    | H25A | H36B <sup>7</sup>  | 3.133    |
| H25A | H37C <sup>7</sup>  | 3.570    | H25A | H78B <sup>7</sup>  | 3.451    |
| H25B | C72 <sup>7</sup>   | 3.115    | H25B | C76 <sup>7</sup>   | 3.044    |
| H25B | C77 <sup>7</sup>   | 3.269    | H25B | C78 <sup>7</sup>   | 3.350    |
| H25B | H36B <sup>7</sup>  | 3.444    | H25B | H77B <sup>7</sup>  | 2.643    |
| H25B | H78A <sup>7</sup>  | 3.397    | H25B | H78B <sup>7</sup>  | 2.990    |
| H25C | C23 <sup>8</sup>   | 3.363    | H25C | C27 <sup>8</sup>   | 3.388    |
| H25C | C36 <sup>7</sup>   | 3.262    | H25C | C77 <sup>7</sup>   | 3.526    |
| H25C | H23A <sup>8</sup>  | 3.015    | H25C | H23B <sup>8</sup>  | 3.056    |
| H25C | H27A <sup>8</sup>  | 3.033    | H25C | H27C <sup>8</sup>  | 3.099    |
| H25C | H36B <sup>7</sup>  | 2.420    | H25C | H36C <sup>7</sup>  | 3.346    |
| H25C | H77B <sup>7</sup>  | 2.627    | H27A | C36 <sup>3</sup>   | 2.950    |
| H27A | H24B <sup>8</sup>  | 3.425    | H27A | H25C <sup>8</sup>  | 3.033    |
| H27A | H36A <sup>3</sup>  | 3.073    | H27A | H36B <sup>3</sup>  | 3.012    |
| H27A | H36C <sup>3</sup>  | 2.322    | H27A | H43B <sup>3</sup>  | 3.502    |
| H27C | C24 <sup>8</sup>   | 3.078    | H27C | H24A <sup>8</sup>  | 3.526    |
| H27C | H24B <sup>8</sup>  | 2.116    | H27C | H25C <sup>8</sup>  | 3.099    |
| H32  | H50A <sup>6</sup>  | 3.196    | H32  | H50C <sup>6</sup>  | 3.593    |
| H36A | H27A <sup>9</sup>  | 3.073    | H36B | C25 <sup>10</sup>  | 3.137    |
| H36B | H23A <sup>9</sup>  | 2.885    | H36B | H25A <sup>10</sup> | 3.133    |
| H36B | H25B <sup>10</sup> | 3.444    | H36B | H25C <sup>10</sup> | 2.420    |
| H36B | H27A <sup>9</sup>  | 3.012    | H36C | C10 <sup>9</sup>   | 3.346    |
| H36C | C23 <sup>9</sup>   | 3.126    | H36C | C27 <sup>9</sup>   | 3.301    |
| H36C | H10B <sup>9</sup>  | 2.596    | H36C | H10C <sup>9</sup>  | 3.376    |
| H36C | H23A <sup>9</sup>  | 2.156    | H36C | H23B <sup>9</sup>  | 3.511    |
| H36C | H23C <sup>9</sup>  | 3.536    | H36C | H25C <sup>10</sup> | 3.346    |
| H36C | H27A <sup>9</sup>  | 2.322    | H37A | C50 <sup>6</sup>   | 3.089    |
| H37A | H13B <sup>6</sup>  | 3.429    | H37A | H13C <sup>6</sup>  | 3.348    |
| H37A | H50A <sup>6</sup>  | 3.041    | H37A | H50B <sup>6</sup>  | 3.042    |
| H37A | H50C <sup>6</sup>  | 2.671    | H37A | H70B <sup>10</sup> | 3.338    |

Table S13-11. Intermolecular contacts less than 3.60 Å involving hydrogens (continued)

| atom | atom               | distance | atom | atom               | distance |
|------|--------------------|----------|------|--------------------|----------|
| H37B | C13 <sup>6</sup>   | 3.335    | H37B | C23 <sup>9</sup>   | 3.476    |
| H37B | H10A <sup>9</sup>  | 3.560    | H37B | H10B <sup>9</sup>  | 3.545    |
| H37B | H13B <sup>6</sup>  | 2.717    | H37B | H13C <sup>6</sup>  | 3.077    |
| H37B | H23A <sup>9</sup>  | 2.944    | H37B | H23B <sup>9</sup>  | 3.503    |
| H37B | H23C <sup>9</sup>  | 3.436    | H37C | H23A <sup>9</sup>  | 3.513    |
| H37C | H25A <sup>10</sup> | 3.570    | H37C | H70B <sup>10</sup> | 2.834    |
| H38B | C10 <sup>9</sup>   | 3.304    | H38B | H10A <sup>9</sup>  | 3.179    |
| H38B | H10B <sup>9</sup>  | 2.569    | H38B | H11C <sup>9</sup>  | 3.400    |
| H38B | H13B <sup>6</sup>  | 3.065    | H38B | H42A <sup>6</sup>  | 3.217    |
| H38C | H38C <sup>6</sup>  | 3.539    | H38C | H42A <sup>6</sup>  | 3.399    |
| H38C | H42B <sup>6</sup>  | 3.556    | H40A | H67A <sup>11</sup> | 2.821    |
| H40B | H11A <sup>5</sup>  | 3.317    | H40B | H64C <sup>11</sup> | 3.572    |
| H40C | C64 <sup>11</sup>  | 3.369    | H40C | H59 <sup>11</sup>  | 2.939    |
| H40C | H64C <sup>11</sup> | 2.414    | H40C | H67A <sup>11</sup> | 2.720    |
| H41A | H67A <sup>11</sup> | 3.131    | H41A | H67B <sup>11</sup> | 3.416    |
| H41A | H71A <sup>10</sup> | 3.391    | H41B | C79 <sup>10</sup>  | 3.234    |
| H41B | H59 <sup>11</sup>  | 3.314    | H41B | H64C <sup>11</sup> | 3.515    |
| H41B | H67A <sup>11</sup> | 3.014    | H41B | H68A <sup>11</sup> | 2.874    |
| H41B | H71A <sup>10</sup> | 3.106    | H41B | H79A <sup>10</sup> | 2.793    |
| H41B | H79B <sup>10</sup> | 2.800    | H41C | C71 <sup>10</sup>  | 3.399    |
| H41C | H70A <sup>10</sup> | 3.310    | H41C | H70B <sup>10</sup> | 3.580    |
| H41C | H71A <sup>10</sup> | 2.789    | H41C | H71C <sup>10</sup> | 3.164    |
| H41C | H79A <sup>10</sup> | 3.495    | H41C | H79B <sup>10</sup> | 2.873    |
| H42A | C11 <sup>5</sup>   | 3.414    | H42A | H11A <sup>5</sup>  | 2.945    |
| H42A | H11C <sup>5</sup>  | 3.005    | H42A | H38B <sup>6</sup>  | 3.217    |
| H42A | H38C <sup>6</sup>  | 3.399    | H42A | H50A <sup>6</sup>  | 3.461    |
| H42A | H51B <sup>6</sup>  | 3.266    | H42A | H51C <sup>6</sup>  | 3.465    |
| H42B | C50 <sup>6</sup>   | 3.344    | H42B | C51 <sup>6</sup>   | 3.337    |
| H42B | H38C <sup>6</sup>  | 3.556    | H42B | H50A <sup>6</sup>  | 2.425    |
| H42B | H50C <sup>6</sup>  | 3.535    | H42B | H51B <sup>6</sup>  | 3.091    |
| H42B | H51C <sup>6</sup>  | 2.719    | H42B | H70A <sup>10</sup> | 3.563    |
| H42B | H79B <sup>10</sup> | 3.287    | H42C | C51 <sup>6</sup>   | 3.341    |
| H42C | C64 <sup>11</sup>  | 3.348    | H42C | H11A <sup>5</sup>  | 3.434    |
| H42C | H11C <sup>5</sup>  | 3.179    | H42C | H51B <sup>6</sup>  | 3.174    |
| H42C | H51C <sup>6</sup>  | 2.683    | H42C | H64A <sup>11</sup> | 3.313    |
| H42C | H64B <sup>11</sup> | 3.408    | H42C | H64C <sup>11</sup> | 2.800    |
| H42C | H79B <sup>10</sup> | 3.223    | H43A | C69 <sup>9</sup>   | 3.597    |



Table S13-11. Intermolecular contacts less than 3.60 Å involving hydrogens (continued)

| atom | atom              | distance | atom | atom              | distance |
|------|-------------------|----------|------|-------------------|----------|
| H43A | H14B <sup>9</sup> | 2.758    | H43A | H15A <sup>9</sup> | 3.550    |
| H43A | H69B <sup>9</sup> | 3.191    | H43A | H69C <sup>9</sup> | 3.091    |
| H43B | C69 <sup>9</sup>  | 3.578    | H43B | H27A <sup>9</sup> | 3.502    |
| H43B | H68B <sup>9</sup> | 3.107    | H43B | H68C <sup>9</sup> | 3.450    |
| H43B | H69B <sup>9</sup> | 3.330    | H43B | H69C <sup>9</sup> | 2.974    |
| H43C | H10B <sup>9</sup> | 3.187    | H43C | H11C <sup>9</sup> | 3.581    |
| H44A | H69B <sup>9</sup> | 3.481    | H44A | H81C <sup>7</sup> | 3.230    |
| H44C | C68 <sup>9</sup>  | 3.490    | H44C | H68B <sup>9</sup> | 3.557    |
| H44C | H68C <sup>9</sup> | 2.622    | H44C | H69B <sup>9</sup> | 3.469    |
| H50A | C42 <sup>6</sup>  | 3.303    | H50A | H32 <sup>6</sup>  | 3.196    |
| H50A | H37A <sup>6</sup> | 3.041    | H50A | H42A <sup>6</sup> | 3.461    |
| H50A | H42B <sup>6</sup> | 2.425    | H50A | H70A <sup>4</sup> | 3.268    |
| H50B | H37A <sup>6</sup> | 3.042    | H50C | C37 <sup>6</sup>  | 3.503    |
| H50C | C70 <sup>4</sup>  | 2.935    | H50C | H32 <sup>6</sup>  | 3.593    |
| H50C | H37A <sup>6</sup> | 2.671    | H50C | H42B <sup>6</sup> | 3.535    |
| H50C | H70A <sup>4</sup> | 2.584    | H50C | H70B <sup>4</sup> | 2.993    |
| H50C | H70C <sup>4</sup> | 2.740    | H50C | H80C <sup>4</sup> | 3.218    |
| H51A | C15 <sup>9</sup>  | 3.331    | H51A | H5 <sup>9</sup>   | 3.376    |
| H51A | H11C <sup>9</sup> | 3.362    | H51A | H15A <sup>9</sup> | 2.363    |
| H51B | C42 <sup>6</sup>  | 3.365    | H51B | H11C <sup>9</sup> | 2.816    |
| H51B | H42A <sup>6</sup> | 3.266    | H51B | H42B <sup>6</sup> | 3.091    |
| H51B | H42C <sup>6</sup> | 3.174    | H51C | C42 <sup>6</sup>  | 3.098    |
| H51C | C79 <sup>4</sup>  | 3.431    | H51C | H42A <sup>6</sup> | 3.465    |
| H51C | H42B <sup>6</sup> | 2.719    | H51C | H42C <sup>6</sup> | 2.683    |
| H51C | H70A <sup>4</sup> | 3.529    | H51C | H79B <sup>4</sup> | 2.890    |
| H51C | H79C <sup>4</sup> | 3.066    | H51C | H80B <sup>4</sup> | 3.459    |
| H51C | H80C <sup>4</sup> | 3.098    | H52A | C9 <sup>2</sup>   | 3.302    |
| H52A | H9A <sup>2</sup>  | 2.795    | H52A | H9B <sup>2</sup>  | 3.276    |
| H52A | H9C <sup>2</sup>  | 3.309    | H52A | H14B <sup>9</sup> | 3.529    |
| H52B | C14 <sup>9</sup>  | 3.188    | H52B | H9A <sup>2</sup>  | 3.121    |
| H52B | H14B <sup>9</sup> | 2.320    | H52B | H14C <sup>9</sup> | 3.312    |
| H52B | H15A <sup>9</sup> | 2.945    | H52C | C9 <sup>2</sup>   | 3.405    |
| H52C | C17 <sup>2</sup>  | 3.137    | H52C | H9A <sup>2</sup>  | 2.864    |
| H52C | H9B <sup>2</sup>  | 3.097    | H52C | H14B <sup>9</sup> | 3.386    |
| H52C | H15A <sup>9</sup> | 3.089    | H52C | H15C <sup>9</sup> | 3.517    |
| H52C | H17A <sup>2</sup> | 3.513    | H52C | H17B <sup>2</sup> | 2.522    |
| H52C | H17C <sup>2</sup> | 2.963    | H52C | H80B <sup>4</sup> | 2.881    |

Table S13-11. Intermolecular contacts less than 3.60 Å involving hydrogens (continued)

| atom | atom               | distance | atom | atom               | distance |
|------|--------------------|----------|------|--------------------|----------|
| H53A | H53A <sup>2</sup>  | 3.581    | H53A | H53B <sup>2</sup>  | 3.005    |
| H53A | H81A <sup>7</sup>  | 3.480    | H53B | C53 <sup>2</sup>   | 3.569    |
| H53B | H53A <sup>2</sup>  | 3.005    | H53B | H53B <sup>2</sup>  | 3.218    |
| H53B | H80A <sup>4</sup>  | 3.414    | H54B | H65B <sup>4</sup>  | 3.413    |
| H54B | H70C <sup>4</sup>  | 3.160    | H59  | H40C <sup>11</sup> | 2.939    |
| H59  | H41B <sup>11</sup> | 3.314    | H63A | H23B <sup>8</sup>  | 3.448    |
| H63B | C23 <sup>8</sup>   | 3.314    | H63B | C24 <sup>8</sup>   | 3.352    |
| H63B | H15B <sup>12</sup> | 3.468    | H63B | H23B <sup>8</sup>  | 2.677    |
| H63B | H23C <sup>8</sup>  | 3.078    | H63B | H24A <sup>8</sup>  | 2.425    |
| H63B | H24B <sup>8</sup>  | 3.553    | H63C | C15 <sup>12</sup>  | 3.236    |
| H63C | H13C <sup>12</sup> | 3.424    | H63C | H15B <sup>12</sup> | 2.328    |
| H63C | H15C <sup>12</sup> | 3.394    | H63C | H23B <sup>8</sup>  | 3.516    |
| H63C | H23C <sup>8</sup>  | 3.484    | H64A | C11 <sup>12</sup>  | 3.210    |
| H64A | C15 <sup>12</sup>  | 3.465    | H64A | H5 <sup>12</sup>   | 2.929    |
| H64A | H11B <sup>12</sup> | 2.462    | H64A | H11C <sup>12</sup> | 3.172    |
| H64A | H15A <sup>12</sup> | 3.352    | H64A | H15B <sup>12</sup> | 2.728    |
| H64A | H42C <sup>11</sup> | 3.313    | H64B | H24A <sup>8</sup>  | 3.003    |
| H64B | H42C <sup>11</sup> | 3.408    | H64B | H79A <sup>3</sup>  | 3.371    |
| H64B | H79C <sup>3</sup>  | 3.177    | H64C | C40 <sup>11</sup>  | 3.323    |
| H64C | H11B <sup>12</sup> | 3.017    | H64C | H40B <sup>11</sup> | 3.572    |
| H64C | H40C <sup>11</sup> | 2.414    | H64C | H41B <sup>11</sup> | 3.515    |
| H64C | H42C <sup>11</sup> | 2.800    | H65B | C11 <sup>12</sup>  | 3.520    |
| H65B | H5 <sup>12</sup>   | 3.422    | H65B | H9C <sup>12</sup>  | 3.185    |
| H65B | H11B <sup>12</sup> | 2.559    | H65B | H15B <sup>12</sup> | 3.547    |
| H65B | H54B <sup>12</sup> | 3.413    | H65C | H11B <sup>12</sup> | 3.043    |
| H67A | C40 <sup>11</sup>  | 3.196    | H67A | C41 <sup>11</sup>  | 3.463    |
| H67A | H40A <sup>11</sup> | 2.821    | H67A | H40C <sup>11</sup> | 2.720    |
| H67A | H41A <sup>11</sup> | 3.131    | H67A | H41B <sup>11</sup> | 3.014    |
| H67A | H67C <sup>11</sup> | 3.136    | H67B | H41A <sup>11</sup> | 3.416    |
| H67B | H81B <sup>11</sup> | 3.082    | H67B | H81C <sup>11</sup> | 3.472    |
| H67C | C67 <sup>11</sup>  | 3.475    | H67C | H67A <sup>11</sup> | 3.136    |
| H67C | H67C <sup>11</sup> | 2.907    | H68A | H41B <sup>11</sup> | 2.874    |
| H68A | H77A <sup>3</sup>  | 2.710    | H68A | H79A <sup>3</sup>  | 2.679    |
| H68B | C77 <sup>3</sup>   | 3.494    | H68B | H24B <sup>8</sup>  | 3.531    |
| H68B | H43B <sup>3</sup>  | 3.107    | H68B | H44C <sup>3</sup>  | 3.557    |
| H68B | H77A <sup>3</sup>  | 2.712    | H68B | H77B <sup>3</sup>  | 3.546    |
| H68C | C44 <sup>3</sup>   | 3.509    | H68C | H43B <sup>3</sup>  | 3.450    |

Table S13-11. Intermolecular contacts less than 3.60 Å involving hydrogens (continued)

| atom | atom               | distance | atom | atom               | distance |
|------|--------------------|----------|------|--------------------|----------|
| H68C | H44C <sup>3</sup>  | 2.622    | H68C | H71A <sup>3</sup>  | 3.593    |
| H68C | H77A <sup>3</sup>  | 2.831    | H68C | H77C <sup>3</sup>  | 3.588    |
| H69B | H43A <sup>3</sup>  | 3.191    | H69B | H43B <sup>3</sup>  | 3.330    |
| H69B | H44A <sup>3</sup>  | 3.481    | H69B | H44C <sup>3</sup>  | 3.469    |
| H69C | C43 <sup>3</sup>   | 3.484    | H69C | H43A <sup>3</sup>  | 3.091    |
| H69C | H43B <sup>3</sup>  | 2.974    | H70A | C50 <sup>12</sup>  | 3.256    |
| H70A | H41C <sup>7</sup>  | 3.310    | H70A | H42B <sup>7</sup>  | 3.563    |
| H70A | H50A <sup>12</sup> | 3.268    | H70A | H50C <sup>12</sup> | 2.584    |
| H70A | H51C <sup>12</sup> | 3.529    | H70B | C37 <sup>7</sup>   | 3.442    |
| H70B | H37A <sup>7</sup>  | 3.338    | H70B | H37C <sup>7</sup>  | 2.834    |
| H70B | H41C <sup>7</sup>  | 3.580    | H70B | H50C <sup>12</sup> | 2.993    |
| H70C | H50C <sup>12</sup> | 2.740    | H70C | H54B <sup>12</sup> | 3.160    |
| H71A | C41 <sup>7</sup>   | 3.268    | H71A | H41A <sup>7</sup>  | 3.391    |
| H71A | H41B <sup>7</sup>  | 3.106    | H71A | H41C <sup>7</sup>  | 2.789    |
| H71A | H68C <sup>9</sup>  | 3.593    | H71C | H41C <sup>7</sup>  | 3.164    |
| H77A | C68 <sup>9</sup>   | 2.917    | H77A | H24B <sup>10</sup> | 3.443    |
| H77A | H24C <sup>10</sup> | 3.290    | H77A | H68A <sup>9</sup>  | 2.710    |
| H77A | H68B <sup>9</sup>  | 2.712    | H77A | H68C <sup>9</sup>  | 2.831    |
| H77B | C25 <sup>10</sup>  | 3.074    | H77B | H24B <sup>10</sup> | 3.417    |
| H77B | H24C <sup>10</sup> | 3.407    | H77B | H25B <sup>10</sup> | 2.643    |
| H77B | H25C <sup>10</sup> | 2.627    | H77B | H68B <sup>9</sup>  | 3.546    |
| H77C | H68C <sup>9</sup>  | 3.588    | H78A | H25B <sup>10</sup> | 3.397    |
| H78B | H16A <sup>10</sup> | 3.196    | H78B | H25A <sup>10</sup> | 3.451    |
| H78B | H25B <sup>10</sup> | 2.990    | H79A | C24 <sup>10</sup>  | 3.532    |
| H79A | C41 <sup>7</sup>   | 3.573    | H79A | C68 <sup>9</sup>   | 3.476    |
| H79A | H24B <sup>10</sup> | 3.578    | H79A | H24C <sup>10</sup> | 2.801    |
| H79A | H41B <sup>7</sup>  | 2.793    | H79A | H41C <sup>7</sup>  | 3.495    |
| H79A | H64B <sup>9</sup>  | 3.371    | H79A | H68A <sup>9</sup>  | 2.679    |
| H79B | C41 <sup>7</sup>   | 3.269    | H79B | H41B <sup>7</sup>  | 2.800    |
| H79B | H41C <sup>7</sup>  | 2.873    | H79B | H42B <sup>7</sup>  | 3.287    |
| H79B | H42C <sup>7</sup>  | 3.223    | H79B | H51C <sup>12</sup> | 2.890    |
| H79C | C17 <sup>10</sup>  | 3.366    | H79C | C24 <sup>10</sup>  | 3.212    |
| H79C | H17A <sup>10</sup> | 2.467    | H79C | H17B <sup>10</sup> | 3.586    |
| H79C | H24A <sup>10</sup> | 3.261    | H79C | H24C <sup>10</sup> | 2.380    |
| H79C | H51C <sup>12</sup> | 3.066    | H79C | H64B <sup>9</sup>  | 3.177    |
| H80A | C46 <sup>12</sup>  | 3.597    | H80A | H17B <sup>10</sup> | 3.574    |
| H80A | H53B <sup>12</sup> | 3.414    | H80B | C17 <sup>10</sup>  | 2.945    |

Table S13-11. Intermolecular contacts less than 3.60 Å involving hydrogens (continued)

| atom | atom               | distance | atom | atom               | distance |
|------|--------------------|----------|------|--------------------|----------|
| H80B | C47 <sup>12</sup>  | 3.268    | H80B | C48 <sup>12</sup>  | 3.428    |
| H80B | C52 <sup>12</sup>  | 3.492    | H80B | H16C <sup>10</sup> | 3.553    |
| H80B | H17A <sup>10</sup> | 2.705    | H80B | H17B <sup>10</sup> | 2.330    |
| H80B | H17C <sup>10</sup> | 3.558    | H80B | H51C <sup>12</sup> | 3.459    |
| H80B | H52C <sup>12</sup> | 2.881    | H80C | C45 <sup>12</sup>  | 3.319    |
| H80C | C46 <sup>12</sup>  | 3.526    | H80C | C47 <sup>12</sup>  | 3.344    |
| H80C | C48 <sup>12</sup>  | 3.021    | H80C | C49 <sup>12</sup>  | 3.009    |
| H80C | C50 <sup>12</sup>  | 3.550    | H80C | C51 <sup>12</sup>  | 3.555    |
| H80C | H50C <sup>12</sup> | 3.218    | H80C | H51C <sup>12</sup> | 3.098    |
| H81A | H16C <sup>10</sup> | 3.534    | H81A | H53A <sup>10</sup> | 3.480    |
| H81B | H67B <sup>11</sup> | 3.082    | H81C | C16 <sup>10</sup>  | 3.394    |
| H81C | H16A <sup>10</sup> | 3.048    | H81C | H16C <sup>10</sup> | 2.984    |
| H81C | H44A <sup>10</sup> | 3.230    | H81C | H67B <sup>11</sup> | 3.472    |
| H26A | H24A <sup>8</sup>  | 3.558    | H26A | H24B <sup>8</sup>  | 3.244    |
| H26C | C23 <sup>8</sup>   | 3.29(5)  | H26C | H23B <sup>8</sup>  | 2.332    |
| H26C | H24A <sup>8</sup>  | 3.264    | H26C | H24B <sup>8</sup>  | 3.512    |

Symmetry Operators:

- |                                   |                                |
|-----------------------------------|--------------------------------|
| (1) $-X+1/2+1, Y+1/2-1, -Z+1/2+1$ | (2) $-X+1, -Y+1, -Z+1$         |
| (3) $X+1, -Y+2, Z+1$              | (4) $X+1, -Y+2, Z$             |
| (5) $-X+1/2+1, Y+1/2, -Z+1/2+1$   | (6) $-X+1, -Y+2, -Z+1$         |
| (7) $-X+1/2, Y+1/2-1, -Z+1/2+1$   | (8) $-X+1, -Y+1, -Z+2$         |
| (9) $X, -Y+2, Z$                  | (10) $-X+1/2, Y+1/2, -Z+1/2+1$ |
| (11) $-X+1, -Y+2, -Z+2$           | (12) $X, -Y+2, Z+1$            |
